# Supplementary material for: Genome-Wide Identification, Structure Characterization, and Expression Pattern Profiling of the Aquaporin Gene Family in Betula pendula
Source: MDPI journal article supplement (doi:10.3390/ijms22147269), 2021-07-06
Supplement: s1 [file s1]

Figure S12

(a) Distribution and homocedasticity

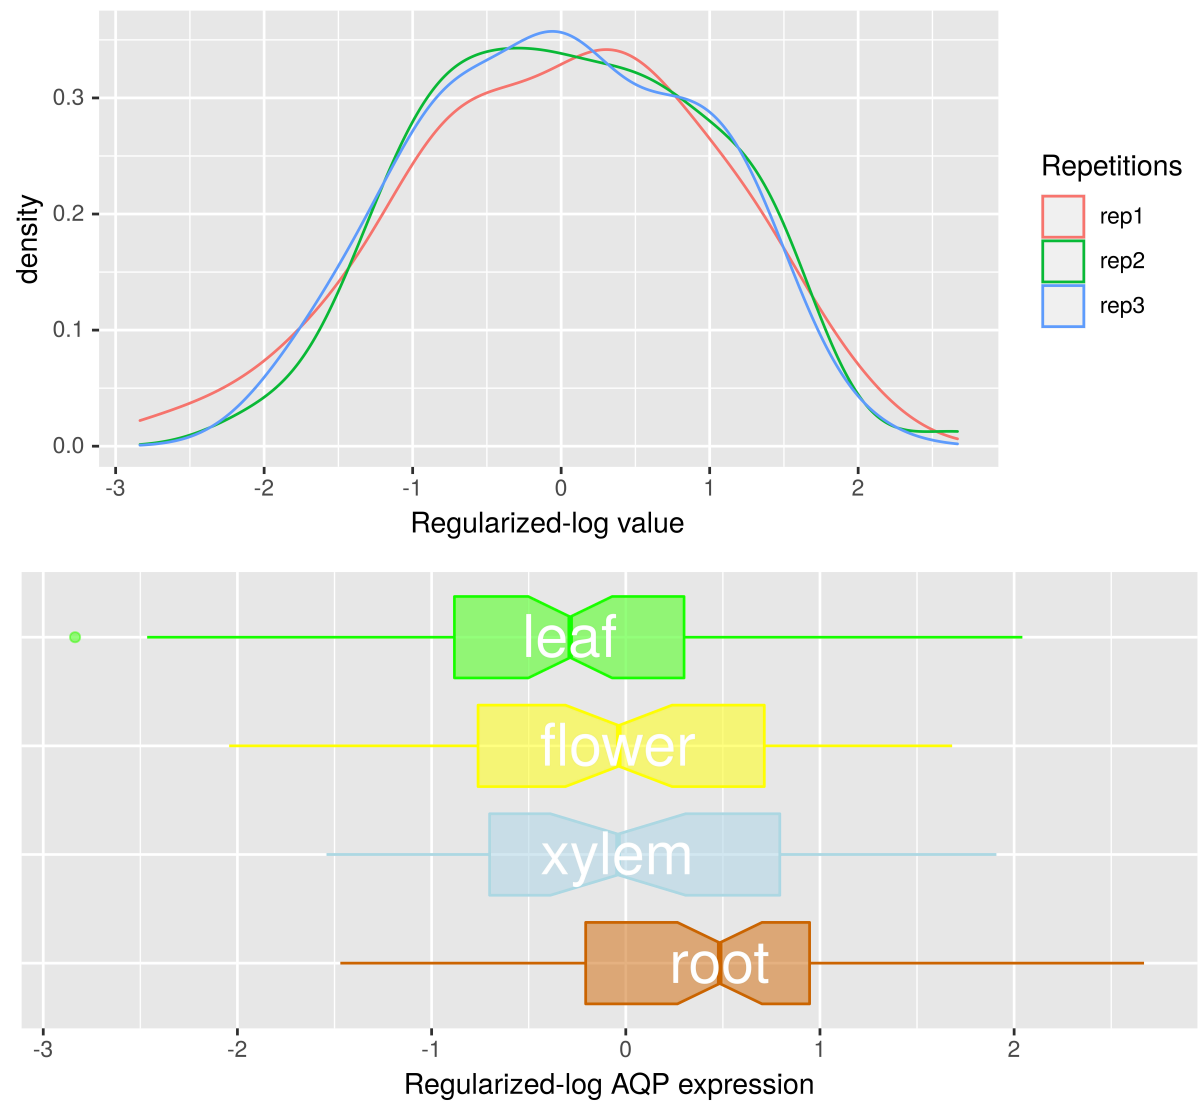

(b) Analysis of variance

| term       | df  | sumsq  | meansq  | statistic | p.value   | contribVariance |
|------------|-----|--------|---------|-----------|-----------|-----------------|
| Tissue     | 3   | 17.22  | 5.738   | 6.242     | 0.0004195 | 83.7 %          |
| rep        | 2   | 0.2507 | 0.1253  | 0.1364    | 0.8726    | 1.8 %           |
| Tissue:rep | 5   | 0.3554 | 0.07107 | 0.07732   | 0.9956    | 1 %             |
| Residuals  | 252 | 231.7  | 0.9193  |           |           | 13.4 %          |

**Figure S12. Exploratory data analysis of organ experiment.** (A) Normality of regularized-log AQP expression data and homoscedasticity. (B) Analysis of variance. The effect of the organ is clear and significant on the general expression profile of AQP.
