# Supplementary material for: Genome-Wide Identification, Structure Characterization, and Expression Pattern Profiling of the Aquaporin Gene Family in Betula pendula
Source: MDPI journal article supplement (doi:10.3390/ijms22147269), 2021-07-06
Supplement: s1 [file s1]

**Figure S6. Amino acid sequence alignments per subfamily of the *Bpe*AQP members from *Betula pendula*. S6A, PIP; S6B, TIP; S6C, XIP; S6D, NIP; S6E, SIP. Legends are detailed at the end of each subfamily alignment.**

### ***Plasma membrane intrinsic proteins (PIPs)***

10 20 30 40 50 60 70 80 90 100

AtPIP1;1 -----MEGKEEDVRVGANKFPERQPIGT--SAQSD---KDYKEPPPAFFPELSSWSFWRAGIAETIATFLFLYITVLTVMGVKRSPNM-----CASVGI  
SlPIP1;1 -----MAENKEEDVNLGANKFREPQPLGT--SAQTD---KDYKEPPPAFLYEPGELSSWSFYRAGIAETMATFLFLYITILTVMGLKRSDSL-----CSSVGI  
BpePIP1;1 -----MEGKDEDVRLGANRYRERQPIGT--AAQSQDT-KDYQEPAAFFPELSSWSFYRAGIAETVATFLFLYITVLTVMGVSKSPSK-----CSTVGI  
BpePIP1;3 -----MEGKEEDVRLGANKFPERQPIGT--AAQSQDEGKDYIEPPPAFLFEPSELTSWSFYRAGIAETVATFLFLYITVLTVMGVAKSPSK-----CSTVGI  
BpePIP1;2 -----MEGKEEDVRLGANKYTERQPLGT--AAQTD---KDYKEPPPAFLFEPGELCSWSFYRAGIAETVATFLFLYITVLTVMGVKRSSSV-----CASVGI  
BpePIP1;4 -----MEGKEEDVKVGASKFPERQAIGT--SAQTD---KDYKEPPPAFLFEPGELQSWSFWRAGIAETIATFLFLYITLLTVMGVSRAPSK-----CASVGV  
AtPIP2;1 -----MAKDVEAVPGEF-FQTRDYQDPPPAFFIDGAELKKWSFYRAVIAETVATLLFLYITVLTVIGYKIQSDTDAGGVDCGGVGI  
SlPIP2;1 MVRHEWLKESTRAKKQRPKKKTETQKWAKIWRLVNLNMHQKTYQDPPPAFLIDPEELGKWSFYRAVIAETIATLLFLYITVLTVIGYKQSST---DQCGVGI  
BpePIP2;1 -----MSKEVS-EEGQSHQHKGKDYVDPPPAFLDLAELKLWSFYRSLIAETIATLLFLYITVATVIGHKKATGP-----CDGVGL  
BpePIP2;2 -----MSKEVT-EEEREASQPVKDYVDPPPAFLFDVAEFTMWSFYRAVIAETIATLLFLYITVATVIGYKKQTDTP-----CETVGL  
BpePIP2;3 -----MSKEVT-EEAEASQPVVDPPPAFLFDVEELTEWSFYRAVIAETIATLLFLYITVATVIGYKKQNDQ-----CETVGL  
BpePIP2;4 -----MAKDAEVPPEH-GSFTAKDYHDDPPPAFLFDVAELTKWSFYRALIAETIATLLFLYITVLTVIGYKQIDPANDGEACGGVGV  
BpePIP2;5 -----MAKDVEVAEHQGEYSAKDYHDDPPPAFLIDYDELTKWSFYRALIAETIATLLFLYITVLTVIGYKQTDPSKNPDQCGGVGI  
BpePIP2;6 -----MAKDMEVGGQSG-FSAKDYHDDPPPAFLIDAEELTKWSFYRAVIAETIATLLFLYITVLTVIGYRAQSDTTRGGDDCGGVGI

-----TM1-----

115 125 135 145 155 165 175 185 195 205

AtPIP1;1 QGIAWAFGGMIFALVYCTAGISGGHINPAVTFGLFLARKLSLTFALFYIVMQCLGAICGAGVVKGFQPKQYQALGGGANVVAHGYTKGSGLGAELIGTFVLVYTV  
SlPIP1;1 QGVAWAFGGMIFALVYCTAGISGGHINPAVTFGLFLARKLSLTFAVFYIVMQCLGAICGAGVVKGFQKQPYQRLGGGANVQPGYTKGDGLGAELIGTFVLVYTV  
BpePIP1;1 QGIAWAFGGMIFALVYCTAGISGGHINPAVTFGLFLARKLSLTFAVFYIVMQCLGAICGAGVVKGFQKNQYERLGGGANVSSGYSKGDGLGAELIGTFVLVYTV  
BpePIP1;3 QGIAWAFGGMIFALVYCTAGISGGHINPAVTFGLFLARKLSLTFALFYIVMQCLGAICGAGVVKGFQKQYERLGGGANVFNPGYTKGDGLGAELIGTFVLVYTV  
BpePIP1;2 QGIAWAFGGMIFALVYCTAGISGGHINPAVTFGLLLARKLSLTFAVFYIVMQCLGAICGAGVVKGFQKTPFEINGGGANVNVHGYTKGDGLGAELIGTFVLVYTV  
BpePIP1;4 QGIAWAFGGMIFALVYCTAGISGGHINPAVTFGLFLARKLSLTFALFYIVMQCLGAICGAGVVKGFQKTQYERVGGGANVNVHGYTKGDGLGAELIGTFVLVYTV  
AtPIP2;1 LGIAWAFGGMIFILVYCTAGISGGHINPAVTFGLFLARKVSLPRALLYIAQCLGAICGVGVKAFQSSYYTRYGGGANSLADGYSTGTGLAEELIGTFVLVYTV  
SlPIP2;1 LGIAWAFGGMIFVLVYCTAGISGGHINPAVTFGLFLARKVSLVRAIMYIVAQCLGAICGCGLVKAFQKAYYVKYGGGANVTLNDGYSTGTGLAEELIGTFVLVYTV  
BpePIP2;1 LGIAWAFGGMIFVLVYCTAGISGGHINPAVTFGLFLARKVSLIRAVSYMVAQCLGAICGVGLVKAFMKHDYNMQGGGANVSPGYSTGTALGAELIGTFVLVYTV  
BpePIP2;2 LGVAWAFGGMIFVLVYSTAGISGGHINPAVTFGLFLARKVSLIRAIYMAQCLGAICGAGLVKGIMKDSYDAFGGGTNTVSPYTKGTALGAELIGTFVLVYTV  
BpePIP2;3 LGVAWAFGGMIFILVYSTAGISGGHINPAVTFGLFLARKVSLIRAIYMAQCLGAICGAGLVKGIMKDYDALGGGTNTVSPYTKGTALGAELIGTFVLVYTV  
BpePIP2;4 LGIAWAFGGMIFVLVYCTAGISGGHINPAVTFGLFLARKVSLVRAVSYMVAQCLGAISGVGLVKAFNKAHYTRYGGGANVTLADGYSTGVGLGAELIGTFVLVYTV  
BpePIP2;5 LGIAWAFGGMIFVLVYCTAGISGGHINPAVTFGLFLARKVSLIRALLYMVAQCLGAICGVGLVKAFQKSDYNRYGGGANVSVGYNKGVGLGAELIGTFVLVYTV  
BpePIP2;6 LGIALAFGGMIFVLVYCTAGISGGHINPAVTFGLFLARKVSLVRAILYMAQCLGAICGCGLVKAFQRAHYTRYGGGANVSVGYNKGTGLAEELIGTFVLVYTV

H2 NPA;LB- P1

---TM2-----TM3-----TM4---

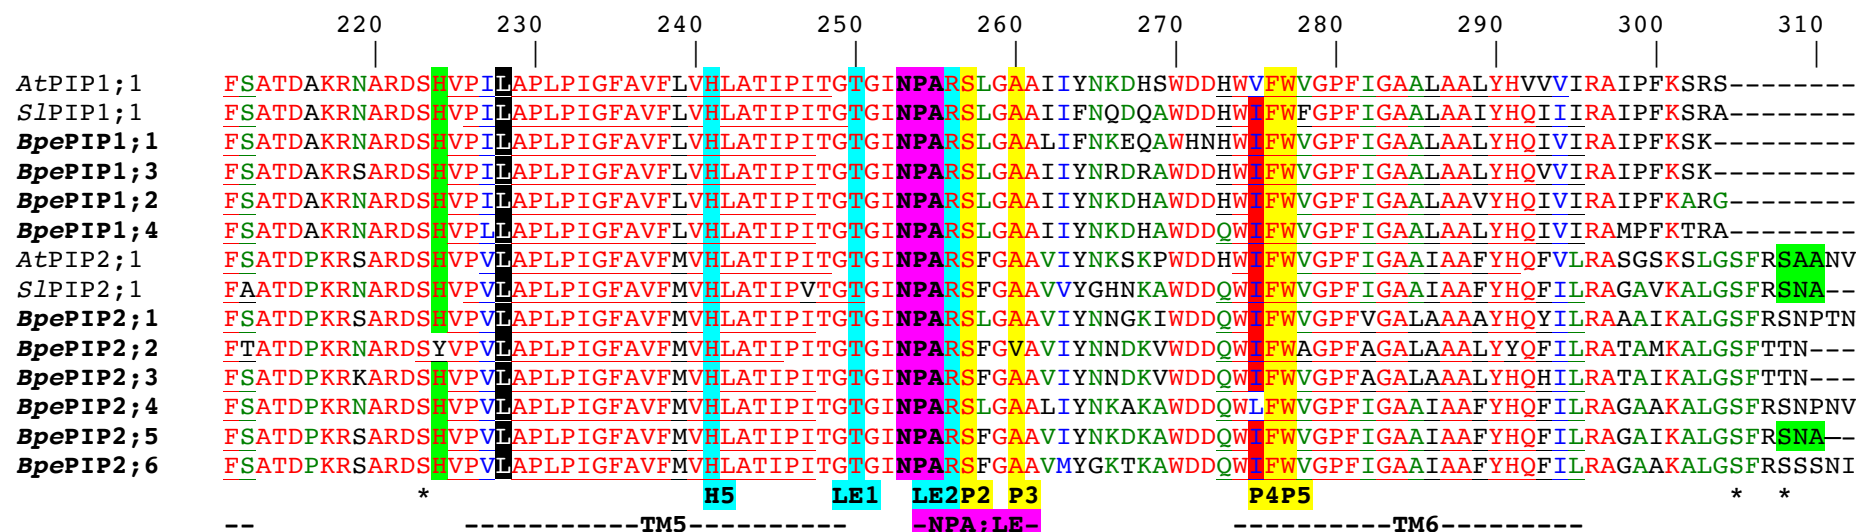

**Figure S6A. Amino acid sequence alignment of the *BpePIP* subfamily members from *Betula pendula*.** S/PIP1;1 and S/PIP2;1 (Solyc10g054840.1.1; Reuscher et al., 2013) from Tomato, and AtPIP1;1 (At3g61430) and AtPIP2;1 (At3g53420) (Muries et al., 2011) from *Arabidopsis thaliana* were used as references. The highest residue similarities between MIP members are shown in red (100%), and green (>80%). Residues with similar physicochemical behaviors are shown in blue. The six transmembrane regions (TM1-TM6) and the two hemi-helicoidal regions that include the «NPA» motives «NPA1» (in Loop B) and «NPA2» (in Loop E) (framed in purple) are underlined. The amino acids residues constituting the ar/R constriction region are shown with blue highlights and labeled H2, H5, LE1 and LE2. Residues constituting the Froger's positions are shown with yellow highlights and labeled P1 to P5. In addition, AEF motif, the His residue involved in gating, the RKXSXXR motif, the SxA motif for putative phosphorylation by PKC are marked in green, the KdvE motif for putative conserved methylation sites are marked in red, and the putative conserved blocking residue (L) is marked in black. Lastly, the Cysteines (C) involved in the tetramerization of PIPs are mentioned in purple. Columns or regions with conserved putative phosphorylation sites are marked with an asterisk. Isoleucine (I) at the position 275 on the alignment and surligned in red and placed in loop E would be key for the transport of CO<sub>2</sub>. Serine (S) at the position 146 on the alignment and surligned in red would be key for the transport of H<sub>2</sub>O<sub>2</sub>.

## Tonoplast intrinsic proteins (TIPs)

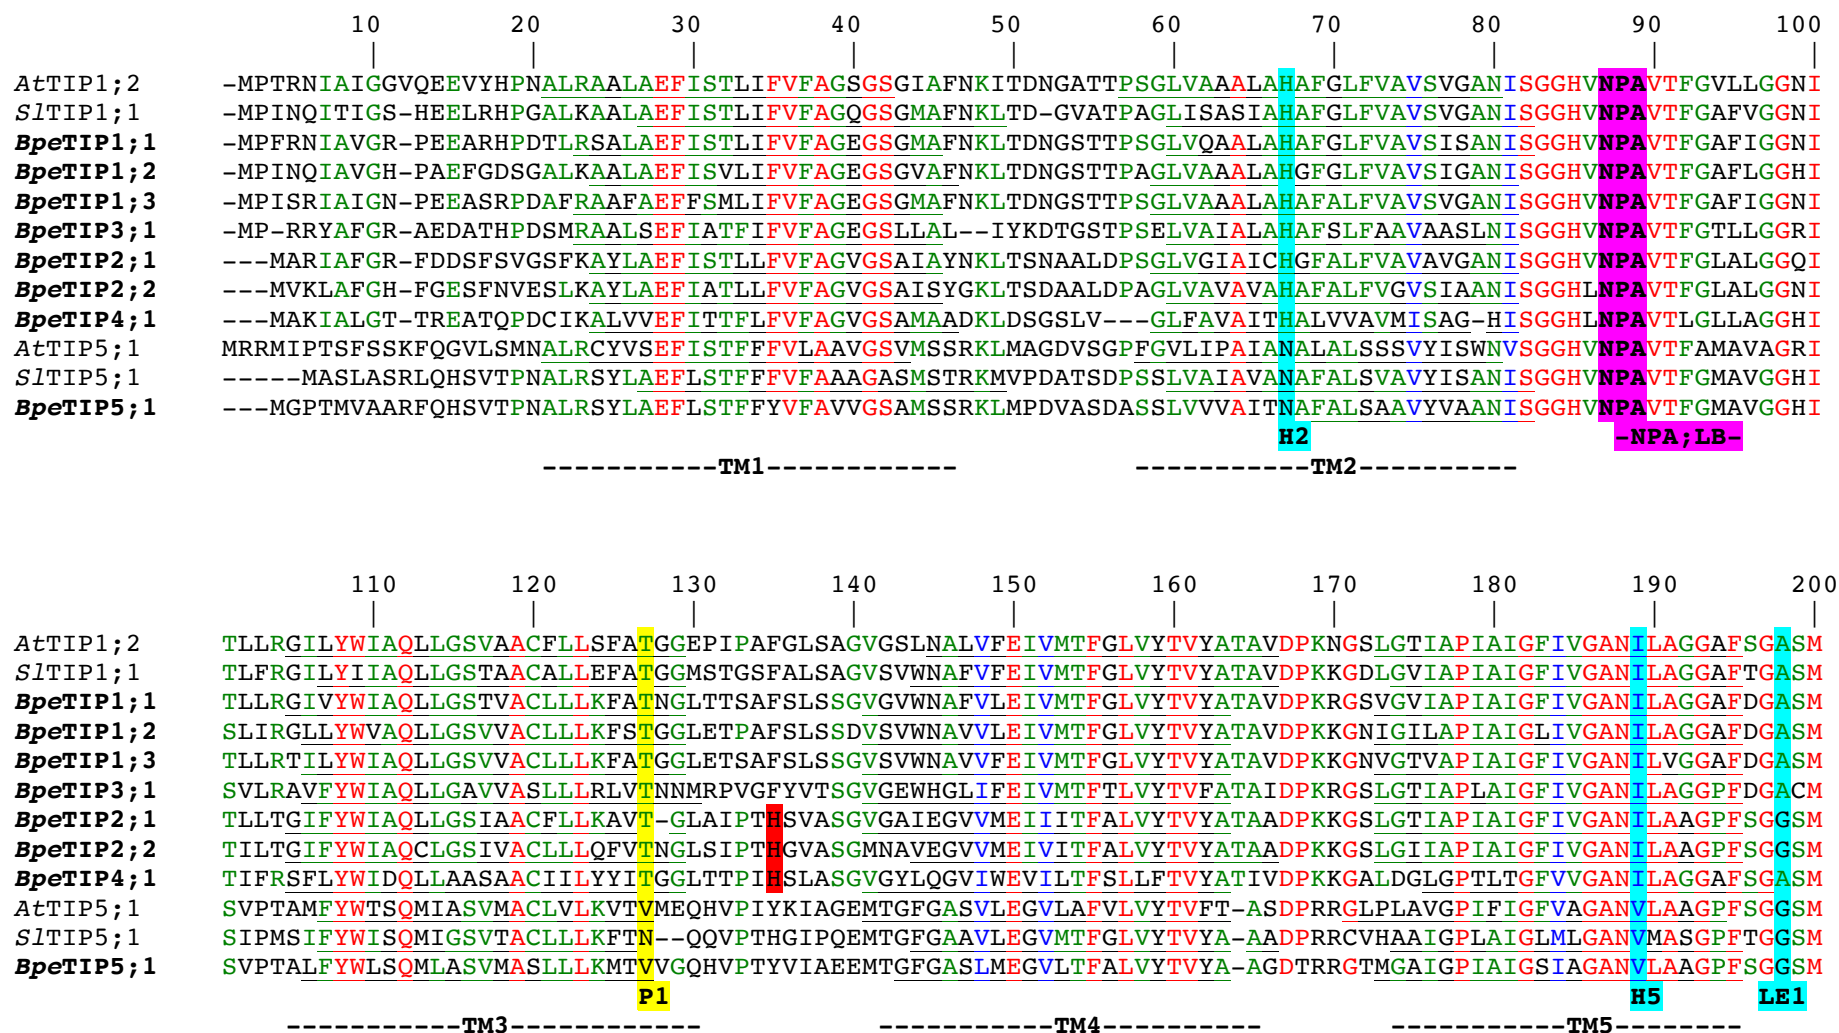

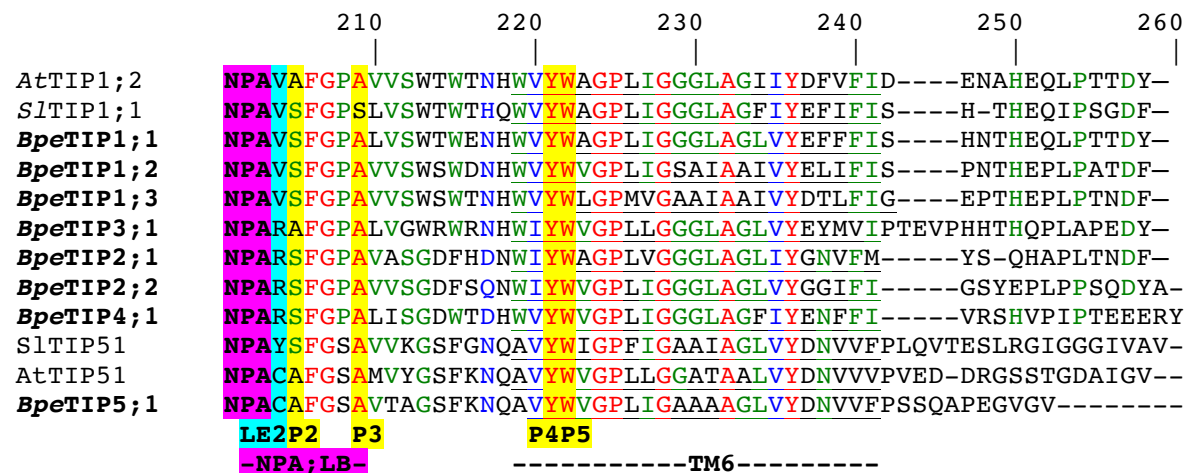

**Figure S6B. Amino acid sequence alignment of the *BpeTIP* subfamily members from *Betula pendula*.** *SlTIP1;1* (Solyc06g074820.1) and *SlTIP5;1* (Solyc03g093230.1) (Reuscher et al., 2013) from Tomato and *AtTIP1;1* (At2g36830) and *AtTIP5;1* (At3g47440) from *Arabidopsis thaliana* were used as references. The highest residue similarities between MIP members are shown in red (100%), and green (>80%). Residues with similar physicochemical behaviors are shown in blue. The six transmembrane domains (TMH1-6) and the two hemi-helicoidal regions that include the «NPA» motives «NPA1» (in Loop B) and «NPA2» (in Loop E) (framed in purple) are underlined. The amino acids residues constituting the ar/R constriction region are shown with blue highlights and labeled H2, H5, LE1 and LE2, and residues constituting the Froger's positions are shown with yellow highlights and labeled P1 to P5. Histidine (H) surligned in red and placed in loop C would be key for the de-protonation of  $\text{NH}_4^+$ , which would allow the transport of  $\text{NH}_3$  independent of pH.

## Uncharacterized *X* intrinsic proteins (XIPs)

The *BpeXIP2*;1 sequence used for the alignment was the redefined sequence (redefinition detailed in the Figure S6)

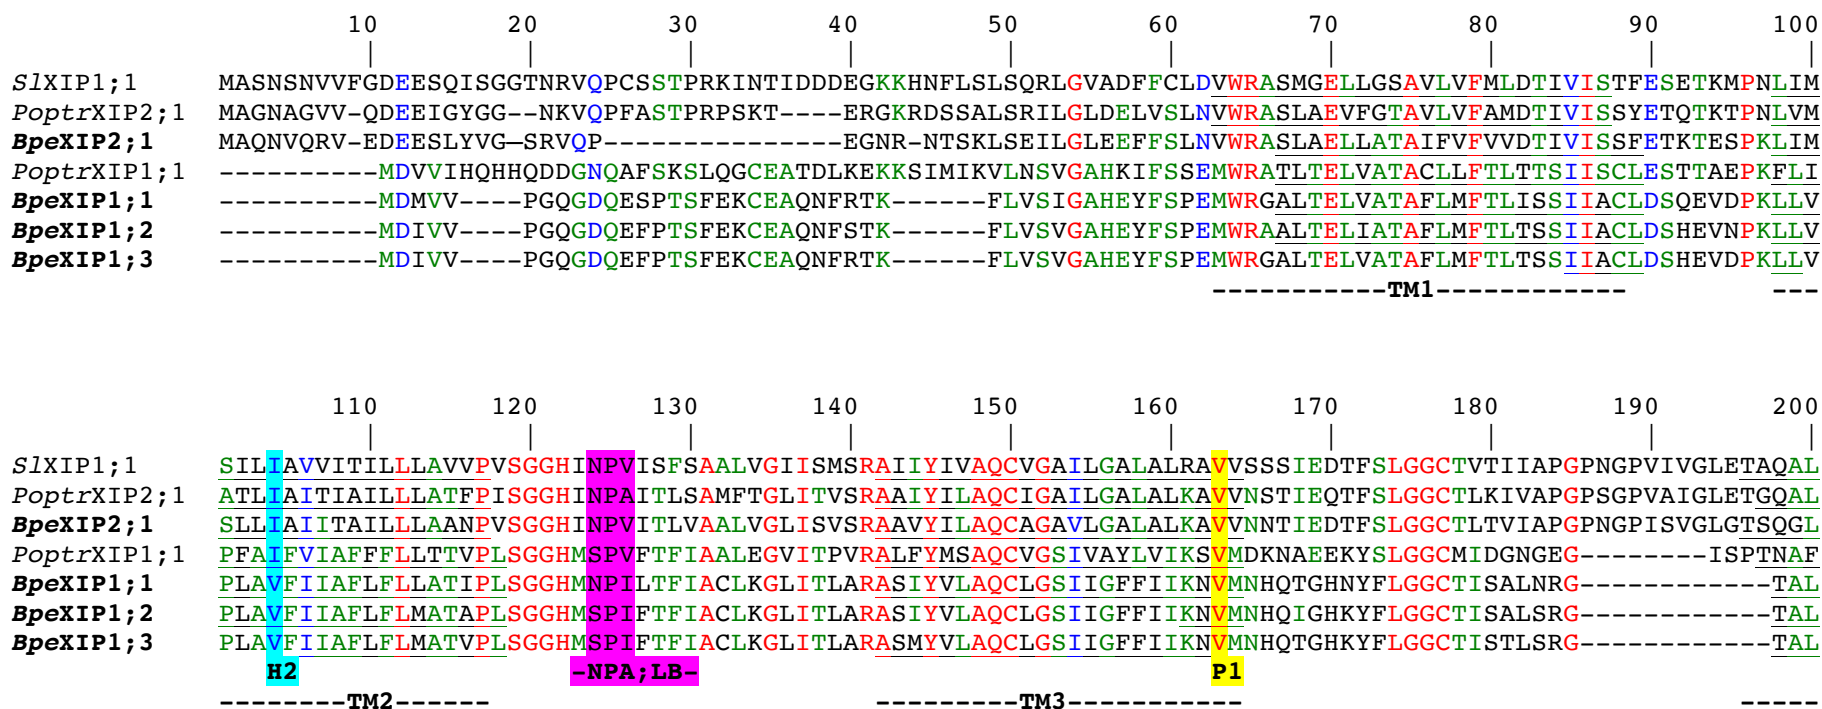

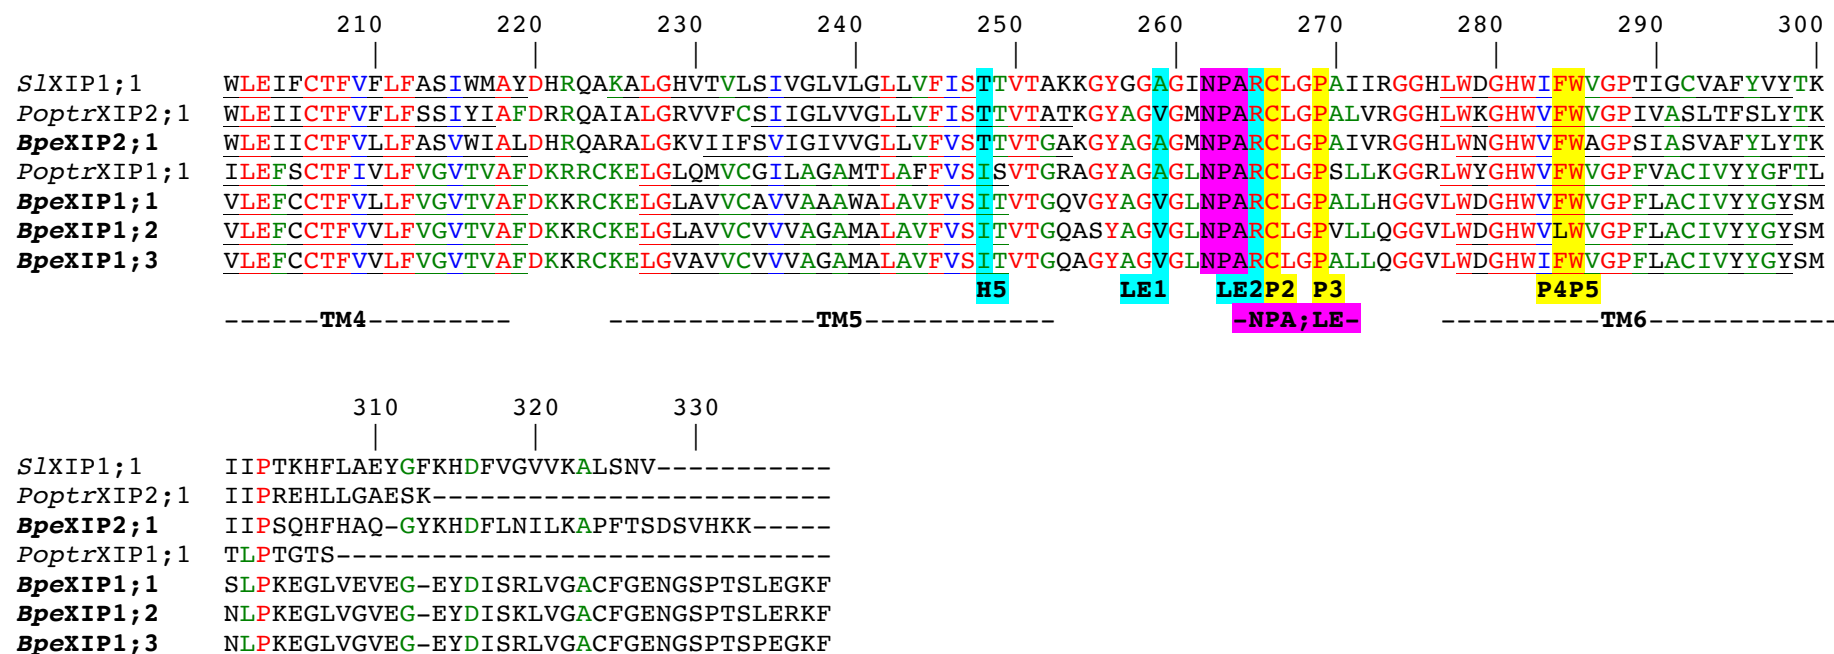

**Figure S6C. Amino acid sequence alignment of the *BpeXIP* subfamily members from *Betula pendula*.** *SlXIP1;1* (Solyc10g054840.1; Reuscher et al., 2013) from Tomato and *PoptrXIP2;1* and *PoptrXIP1;1* (Potri.009G128500.1, Potri.009G128100, resp.; Lopez et al, 2012) from Poplar were used as references. The highest residue similarities between MIP members are shown in red (100%), and green (>80%). Residues with similar physicochemical behaviors are shown in blue. The six transmembrane domains (TMH1-6) and the two hemi-helical regions that include the «NPA» motives «NPA1» (in Loop B) and «NPA2» (in Loop E) (framed in purple) are underlined. The amino acids residues constituting the ar/R constriction region are shown with blue highlights and labeled H2, H5, LE1 and LE2, and residues constituting the Froger's positions are shown with yellow highlights and labeled P1 to P5.



### ***Nodulin-26 like intrinsic proteins (NIPs)***

10 20 30 40 50 60 70 80 90 100  
 | | | | | | | | | |  
 AtNIP1;1 -----MADISGNGYGNAREEVVMVNLKDEVEHQOEMEDIHNPRPLKKQDSLLSVSVPFLOKLI**AEFLGTYFLVFTGCASVVVNM**  
 SlNIP1;1 -----MADHQINVNGNINHGVS-**NIKEDHDLNNHKESST**---SSF----LTPFPIQK**VI**AE**MI**GTY**FL**IFAGCGSVVVN****  
**BpeNIP1;1** -----MGIEELEISKVEEGVGTSAAKTNSDVTVAFCSASVVTITQKLI**AEVIGTYFVIFAGCGAVAVN**  
**BpeNIP4;1** -----MSSQDITKVEEGNSSSSNNNGNSGV---CNSSEIVQLVQK**VI**AE**VIGTYFL**IFAGCGSVVVN****  
**BpeNIP1;2** -----MAENSGSNGSQSITL-NVKECEANHNQASSASK---TNHGGGFCVSVPFMQKL**VAEVLGTYFLIFAGCGAVVVNL**  
**BpeNIP2;1** -----MATDPKPKNLAEANEFVSLNPISRKPKP-GLLRALLEEHPYPGFLSK**VVAETIATYLLVFVTCGSAALSA**  
**BpeNIP5;1** -----MYFFFFGGKSLGFIYLF--LS--AFYLG**AEFVGTFILIFMATAGPIVNQ**  
**BpeNIP5;2** -----MILGLNIFASMDQCLLIEIIKVLKFIFILNDMH--NSTLG**AEFVGTFIMVFSAAAAPIVNE**  
**BpeNIP6;1** MENEEVPSAPSTPATPGTPGAPLFGGFKAERSGNGRRSLLKNCSKCFSDQEWALEEGTLPKLSCSLPPPIPLAKK**VGAEFIGTLILIFAGTATAMVNQ**  
 AtNIP7;1 -----MNGEARSRVVDQEAGSTPSTLRDEDHPSRQRLFGCLPYDIDLNPRI**VMAELVGTFILMFVSCGVISSTQ**  
 SlNIP7;1 -----MKLPSYENGLSVEFQVDASASEQSTYDQETTSSNVEMLERNVNCNSILGIDPIFLRM**VLAELGTFLLMFCICGMMASME**  
**BpeNIP7;1** -----MKGQPHHLDDHTIDHAPTSQGSKDDQEMGVNAMS KSDVLKNSPFSCFPQGM DLNLGRV**VLAELVGTFILMF**CVCGGIIACTQ  
 -----TM1

110 120 130 140 150 160 170 180 190 200

AtNIP1;1 QNDNVVTLPGIAIVWGLTIMVLIYSLGHISGAHINPAVNTIAFASCGRFPLKQVPAYVISQVIGSTLAAATLRLLFGLDHDVDCSGKHDVFIGSSPVGSDLQ

SlNIP1;1 ADKGMITFPGVAITWGLVVMVMVYSVGHISGAHFNPSVNTIAFASVKRFPPWKQVPAYVAAQVLGATLASGTLRLIF-----NGKHDHFAGTLPSTGDFQ

BpeNIP1;1 KIYGSVTFPGICVTWGLIVTVMIIYTVGHISGAHFNPAVNTITS AIFRRFPYKEVPLYIAAQLMGSI LASGTLALVF-----DVTTPDAYFGTVPTGNSNQ

BpeNIP4;1 KIYGSVSFPGICVVWGLIVMVMIIYSVGHISGAHFNPAVNTITFAIFRRFPLKQVPLYIVAQMIGSTLASATLCALF-----PVDKKSFFGTAPVGSNFQ

BpeNIP1;2 GNDKVVTAPGVSIVWGLAVMVLVYSVGHISGAHFNPAVNTIAFATCRRFPWKQVPAYVSAQVLGSTMASGTLRLIF-----NGHENRFVGTIPAGSNLQ

BpeNIP2;1 ADENKVSCLAASVAGGLIVTVMIIYAVGHISGAHFNPAVNTLAFAAVRHFPWKQVPLYAAAQLAGAISAFAATLRLVIL-----NPIKELGTTSPGTGTEIE

BpeNIP5;1 KYNGAESLIGNAACAGLAVMVVILSTGHISGAHLNPSLTIAFATLRFHPWLQVPAYIAAQVSGSICASFALKGVF-----HPYMSGGVTVPSVTEGQ

BpeNIP5;2 KYQGAETLIGSAACAGLAVMAMVLSTGHISGAHFNPSVNTIAFAALRHFPWVQVPGYLVAAQVSASICAFAATLKGVF-----HPFMSGGVTVPAVGIGQ

BpeNIP6;1 KTHGSETLLGCAASSGLAVMVVILSTGHISGAHLNPALENTIAFAALKHFPWKHVPMYIGAQVVASFCAAFALKGIF-----HPIMGGGVTVPSGSYGQ

AtNIP7;1 LSGGHVGLLEIAVTAAGLSVVVVYSIGHISGAHLNPSITIAFAVFGGFPWSQVPLYITAQTLGATAATLVGVSIV-----GVNADIMATKTPALSCVS

SlNIP7;1 IMGVQVGLMEYATTAALT VVVVVFSIGPISGAHINPAVNTLAFAAVGHFPWSKVPLYVVAQVGGSI LATYTGKLVY-----GLKAEFVTTKPLHSCTS

BpeNIP7;1 LSKGEVGLLEIAATAAGLT VVVVIFSI GHISCAHVNPAVNTIAFATFGHFPWSKVPLYILAQTLGSVLATCIGQSVY-----DVKSEFMTTRPLRGCSS

H2 H2 P1

-----TM2----- -NPA;LB- -----TM3-----



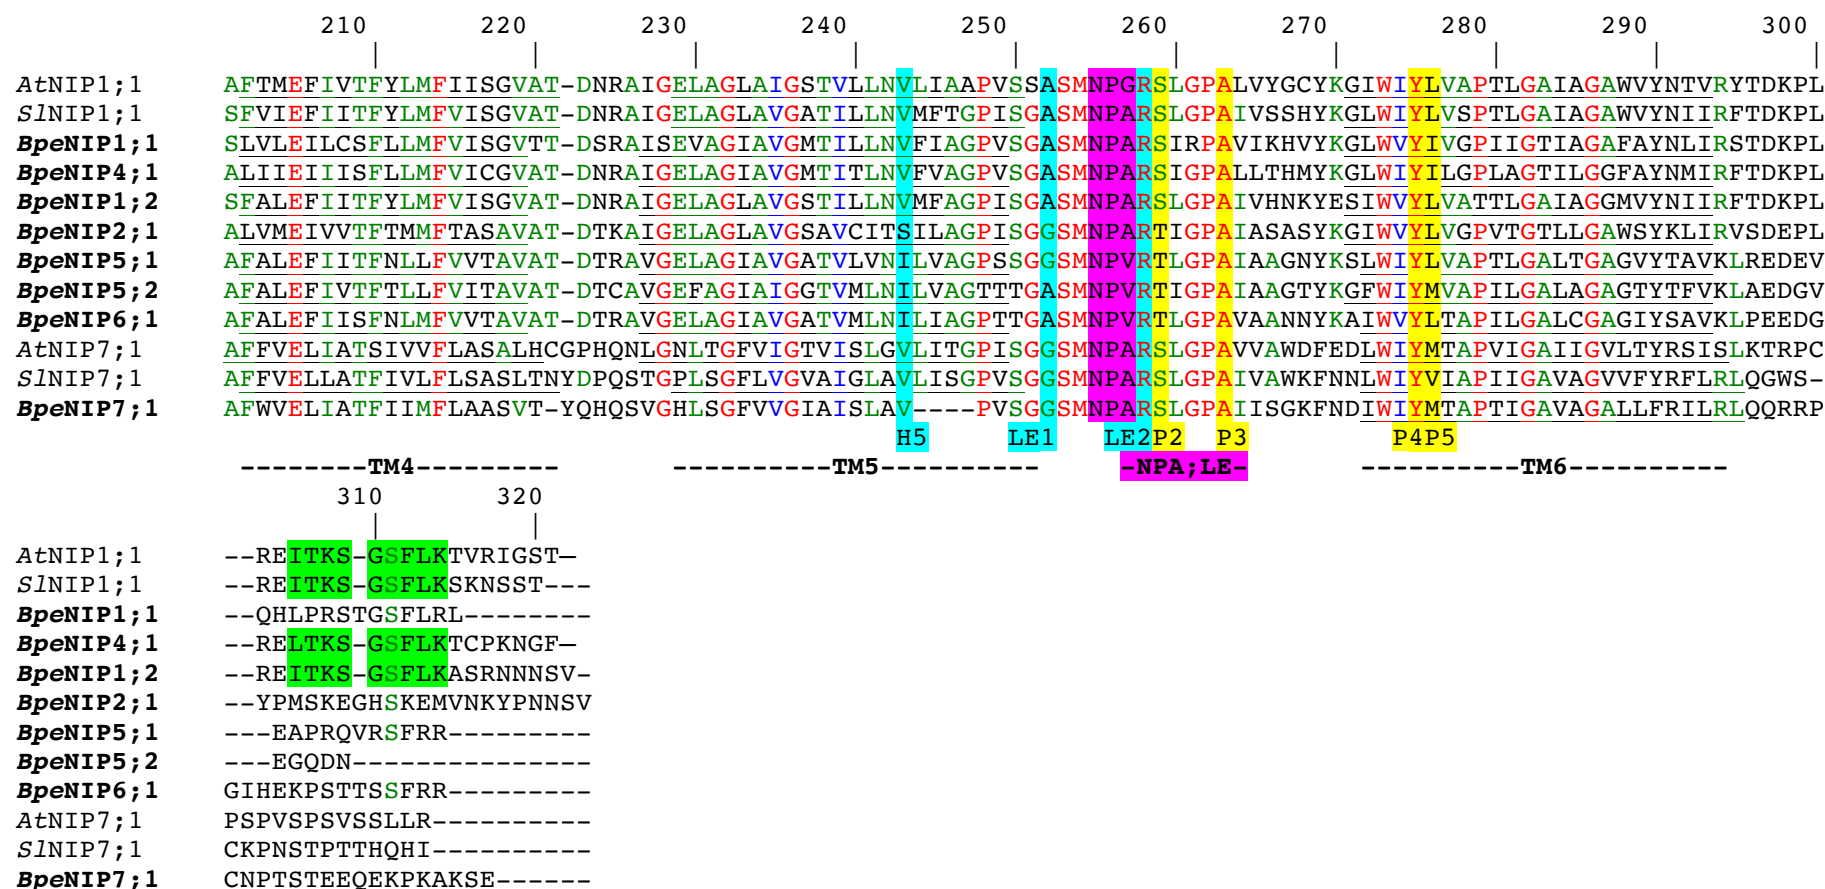

**Figure S6D. Amino acid sequence alignment of the *BpeNIP* subfamily members from *Betula pendula*.** SlnIP1;1 (Solyc03g0059.2) and SlnIP7;1 (Solyc03g0059.1) (Reuscher et al., 2013) from Tomato and AtNIP1;1 (AT4G19030) and AtNIP7;1 (AT3G06100) from *Arabidopsis thaliana* were used as references. The highest residue similarities between MIP members are shown in red (100%), and green (>80%). Residues with similar physicochemical behaviors are shown in blue. The six transmembrane domains (TMH1-6) and the two hemi-helical regions that include the «NPA» motives «NPA1» (in Loop B) and «NPA2» (in Loop E) (framed in purple) are underlined. The amino acids residues constituting the ar/R constriction region are shown with blue highlights and labeled H2, H5, LE1 and LE2, and residues constituting the Froger's positions are shown with yellow highlights and labeled P1 to P5. The putative conserved Calcium-dependent Protein Kinase recognition sites in the C-terminus are highlighted in green. Tyrosine (Y) surlined in red and localized in the TM2 would allow the transport of Urea and Glycine.



## Small basic intrinsic proteins (SIPs)

|           |                                                                                                         |     |               |     |               |     |               |     |          |     |               |
|-----------|---------------------------------------------------------------------------------------------------------|-----|---------------|-----|---------------|-----|---------------|-----|----------|-----|---------------|
|           | 10                                                                                                      | 20  | 30            | 40  | 50            | 60  | 70            | 80  | 90       | 100 |               |
| AtSIP1;1  | -MMGVLSKSAIGDMLMTFSWVLSATFGIQTAALISAGDFQAITWAPLVILTSLIFVYVSIFTVI---FGSASFNPTGSAAFYVAGVPGDTLFSLAIRLP     |     |               |     |               |     |               |     |          |     |               |
| SlSIP1;1  | --MGVIKAAIADGLLTFLWVFCSSNIGVSTYFIASYFGIVNEI-PSLFIITTLIVFVIFLMDFLGDVLGGAGFNPTGNAAFYAAAGLG-DDSLVSAAVRCP   |     |               |     |               |     |               |     |          |     |               |
| BpeSIP1;1 | --MGAIKAAIGDAVLTFMWVFSASTLGAATTVTARALGIEGLVWPSVFIITTVLVFVLVFFFTLIANALGGASFNPTGTASFYAAAGLG-PDTLFSMALRFP  |     |               |     |               |     |               |     |          |     |               |
| BpeSIP1;2 | --MGLMRVAIGDAILTSLWVFSAPMMGILTPIIATYLGVOAKSLAGLFITTLATSLVLIFQLIGKVLGGASFNPSTTVSFYAAAGLKHNSSLISMAVQFP    |     |               |     |               |     |               |     |          |     |               |
| AtSIP2;1  | --MGRIGLVVTDLVLSFMWVWAGVLVNI---LVHGVLGFSRTDPSGEIVRYLFSIISMFIIFAYLQQATKGGLYNPLTALAAGVSG-GFSSFIISVFVRIP   |     |               |     |               |     |               |     |          |     |               |
| SlSIP2;1  | MGVSRRSLVISDFIMSFMWVWSSVLIKM---FVHKILGYGAHD-----LKGAYNPLTILSGAISG-DLTNFIIFTVAARIP                       |     |               |     |               |     |               |     |          |     |               |
| BpeSIP2;1 | --MASAGLLVSDFIISFMWVWVSGVLIKI---FVYKVLLELGH-EPSGEVIKCALSIIVNMFFFAFLGKTTKGGAYNPLTVFAGAISG-DFKRFLFDAGARIP |     |               |     |               |     |               |     |          |     |               |
|           | -----TM1-----                                                                                           |     |               |     | -----TM2----- |     |               |     | -NPA;LB- |     | -----TM3----- |
| 110       | 120                                                                                                     | 130 | 140           | 150 | 160           | 170 | 180           | 190 | 200      |     |               |
| AtSIP1;1  | AQAI GAAGGALAIMEFIPEKYKHMIGGPSLQVDVHTGAIAETILSFGITFAVLLIILRGPRRLAKTFLALATISFVVAGSKYTGTPAMNPAIAFGWAYM    |     |               |     |               |     |               |     |          |     |               |
| SlSIP1;1  | AQVAGAVAGSLALVELIPKHYHHMLDGPALKVDVQGTGAIAEGVLTFFVITFMIFVIVLRGPESVLLKNWLLTMVTLPLVLAGSNFTGTPSMNPANAFGWAYL |     |               |     |               |     |               |     |          |     |               |
| BpeSIP1;1 | AQAA GAVGGALAIMEVMPKNYKHMIGGPSLKVLDLHIGAIAGVLTFLISFAVLVIVLRGPRSPILKTWLLAMATVALVIAGSNYTGTPSMNPANAFGWAYV  |     |               |     |               |     |               |     |          |     |               |
| BpeSIP1;2 | AQAA GGLVGAKAILQVLPSQYKQRLRGPSLKVLDLLTGVI EAALTLGLSFAILLIMLRGPKNPLVKVWLAVAVTVGLLVAGSGYTGTPSMNPANAFGWAFV |     |               |     |               |     |               |     |          |     |               |
| AtSIP2;1  | VEVIGSILAVKHIHVFPEIGK---GPKLNVAIHHGALTEGILTFFIVLLSMGLTRKIPGSFFMKTWIGSLAKLTLHLGSDLTGGCMNPAAVMGWAYA       |     |               |     |               |     |               |     |          |     |               |
| SlSIP2;1  | SQVFGSITGVRFIIAAFPNIGR---GPVLSIDIHRGALTEGILTFAIVSISLGLSRRSRASTFMKTWISSLSKLTLLHLGSDLTGGCMNPASVMGWAYA     |     |               |     |               |     |               |     |          |     |               |
| BpeSIP2;1 | AQVIGSIIGVKLI IETFPEIGL---GPRLNVDIHRGALTEGILTFAIVIISLGLARKIPGSFVMKTWISSVSKLTLLHLGSDLTGGCMNPASVMGWAYA    |     |               |     |               |     |               |     |          |     |               |
|           | ---TM3---                                                                                               |     | -----TM4----- |     |               |     | -----TM5----- |     |          |     | -NPA;LE-      |
|           |                                                                                                         |     |               |     |               |     |               |     |          |     |               |
| 210       | 220                                                                                                     | 230 | 240           | 250 |               |     |               |     |          |     |               |
| AtSIP1;1  | YSSHNTWDHIYVYWISSFVGALS AALLFRSIFPPPRPQK-KKQKKA-----                                                    |     |               |     |               |     |               |     |          |     |               |
| SlSIP1;1  | SNTHKTLHFYVYWISPFIGAILAAWIFRVLFPFPVEQKPQKQKRN-----                                                      |     |               |     |               |     |               |     |          |     |               |
| BpeSIP1;1 | NNRHNTWEQFYVYWICPFVGAILAAWVFRALFPPT-----PAKQKKA-----                                                    |     |               |     |               |     |               |     |          |     |               |
| BpeSIP1;2 | NNQHNTWEHFYVYWIGSFTGATVAGWIYRFLFP-----                                                                  |     |               |     |               |     |               |     |          |     |               |
| AtSIP2;1  | RGEHITKEHLLVYWLGPVKATLLAVWFFKVVFKPLTEEQEKPKAKSE----                                                     |     |               |     |               |     |               |     |          |     |               |
| SlSIP2;1  | RGDHIITKEHIHVYWLAPIQATLLAVWTFNLLVSPSKDKEAKKTEKKSE---                                                    |     |               |     |               |     |               |     |          |     |               |
| BpeSIP2;1 | RGDHIITKEHILVYWLAPIEATLLAVWIFRLVVRPIKEEKANVKKNESLRIC                                                    |     |               |     |               |     |               |     |          |     |               |
|           | P4P5                                                                                                    |     | -----TM4----- |     |               |     |               |     |          |     |               |

**Figure S6E. Amino acid sequence alignment of the *BpeNIP* subfamily members from *Betula pendula*.** *S/SIP1;1* (Solyc12g0196.1), *S/SIP1;2* (Solyc10g0784.1) and *S/SIP2;1* (Solyc01g0567.1) (Reuscher et al., 2013) from Tomato, and *AtSIP1;1* (AT3G04090), *AtSIP1;2* (AT5G18290) and *AtSIP2;1* (AT3G56950) from *Arabidopsis thaliana* were used as references. The highest residue similarities between MIP members are shown in red (100%), and green (>80%). Residues with similar physicochemical behaviors are shown in blue. The six transmembrane domains (TMH1-6) and the two hemi-helical regions that include the «NPA» motives «NPA1» (in Loop B) and «NPA2» (in Loop E) (framed in purple) are underlined. The amino acids residues constituting the ar/R constriction region are shown with blue highlights and labeled H2, H5, LE1 and LE2, and residues constituting the Froger's positions are shown with yellow highlights and labeled P1 to P5.
