# Supplementary material for: Genome-Wide Identification, Structure Characterization, and Expression Pattern Profiling of the Aquaporin Gene Family in Betula pendula
Source: MDPI journal article supplement (doi:10.3390/ijms22147269), 2021-07-06
Supplement: s1 [file s1]

Figure S3

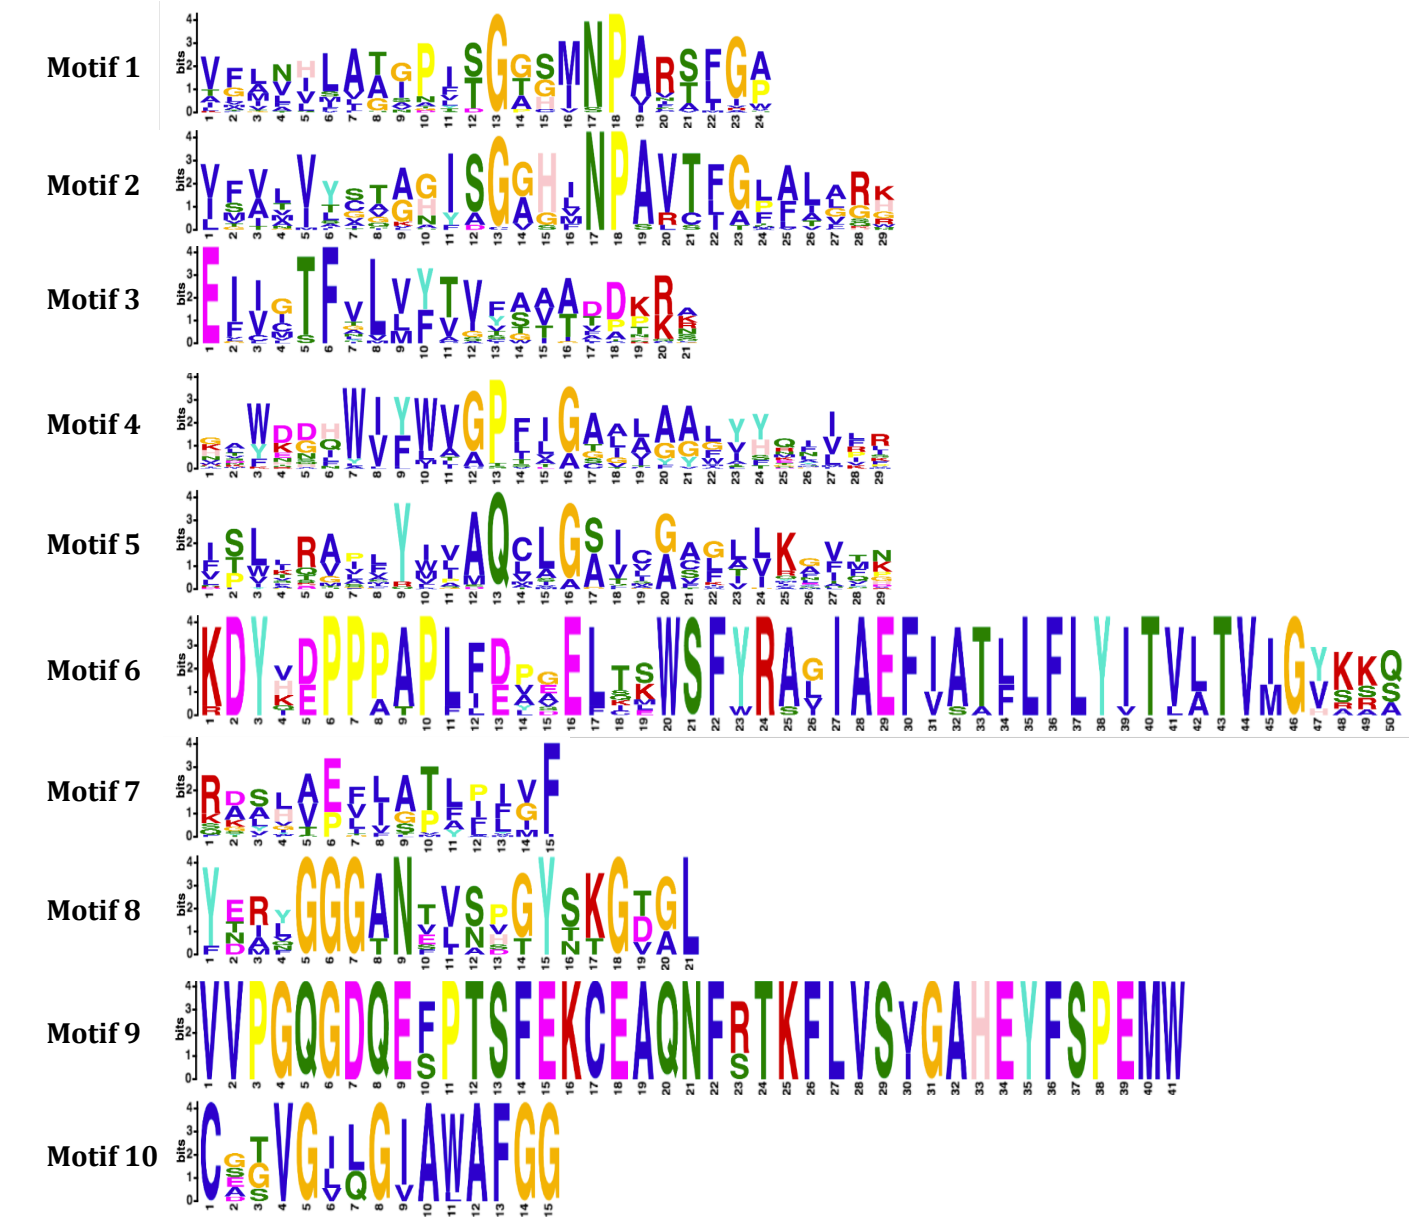

Figure S3. Amino acids constituting the ten motifs of the 33 full-length *BpeAQP* protein sequences (Figure 2C). Motif analysis was performed with the MEME web server. The statistics of MEME motifs detected in the AQP multiple alignments are detailed in the next pages of this document.

Motif 1

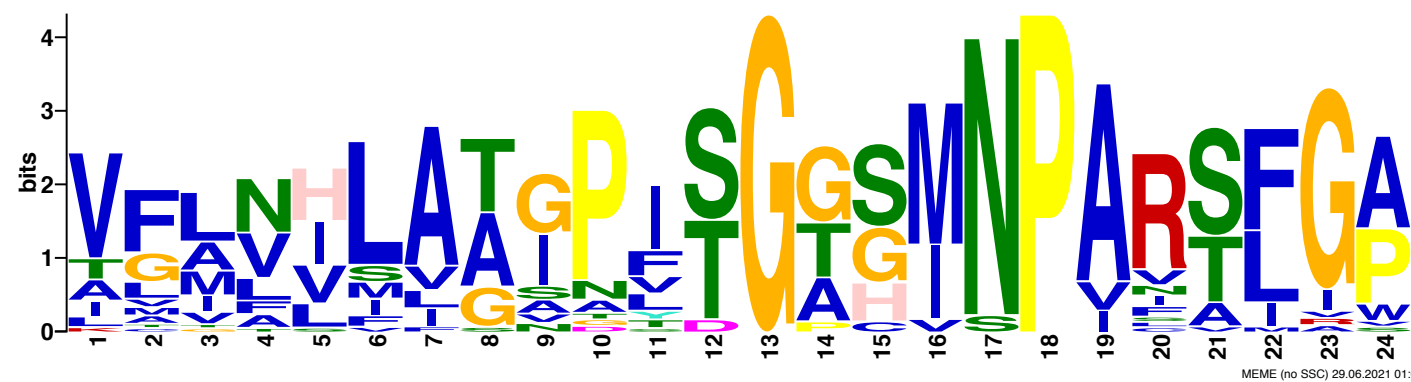

MOTIF 1

VFLNHLAAGPISGGSMNPARSFGA MEME-1,  
width = 24 sites = 34 llr = 1338 E-value = 9.2 10<sup>-296</sup>.

Simplified pos.-specific probability matrix :

|   |                                 |
|---|---------------------------------|
| A | 1121::7411:::2:::8:1::5         |
| C | :::~::~~::~~::1:~::~~:::        |
| D | :::~::~~::~~::1:~::~~:::        |
| E | :::~::~~::~~::~~::~~:::         |
| F | :4:1:1:::2:~::~~:::1:5::        |
| G | :2:~::~~::24:~::~a43:~::~~::8:  |
| H | :::3:~::~~::~~::2:~::~~:::      |
| I | 1:1:311:3:4:~::~3:11:11:        |
| K | :::~::~~::~~::~~::~~:::         |
| L | 1141161:::1:~::~~::~~::4::      |
| M | :12::1:~::~~::~~::6:~::~~:::    |
| N | :::4:~::~~::11:~::~~::9:1:~:::  |
| P | :::~::~~::8:~::1:~::~a:~::~4    |
| Q | :::~::~~::~~::~~::~~:::         |
| R | :::~::~~::~~::~~::~6:~:::       |
| S | :::~::1:~::1:5:~::4:1:~::5:~::  |
| T | 1:~::~~::4:~::14:3:~::~~::3:~:: |
| V | 61132:1:1:1:~::~~::1:11:~:::    |
| W | :::~::~~::~~::~~::~~::1         |
| Y | :::~::~~::~~::~~::~~:::         |

Detailed statistics of MEME motifs detected in the AQP multiple alignments.

*Simplified po(sition)-specific probability matrix* represents in horizontal coordinate the position of each amino-acid in the motif and in vertical coordinate the relative occurrence of amino-acid variation in the detected motif. For instance, in the motif 1, the first amino-acid (left-most column in the matrix) is represented majoritarilly by V (6), and minoritarilly by A(1), I(1), L(1) and T(1). Capital letters are IUPAC's amino-acid one-letter code. **a** = all sequences show the same amino-acid. **llr** = log-likelihood ratio. Colons are meant for visual alignments of each column in the matrix when using a monospaced font. This statistical approach applies to all of the following 9 motifs.

## Motif 2

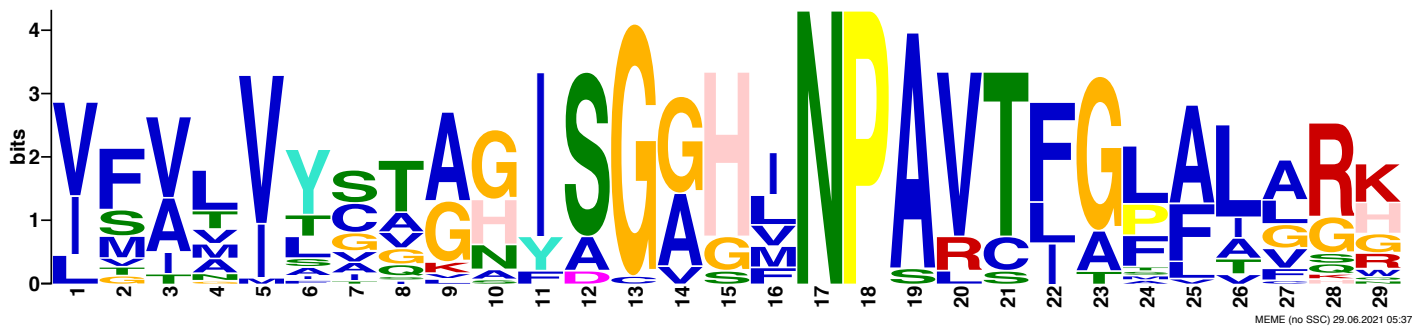

## MOTIF 2

VFVLVYSTAGISGGHINPAVTFGLALARK MEME-2,  
width = 29 sites = 31 llr = 1510 E-value =  $2.8 \cdot 10^{-344}$ .

Simplified pos.-specific probability matrix :

|   |                              |
|---|------------------------------|
| A | ::31:11251:2:4:::9:::2:513:: |
| C | :::::3:::2::::               |
| D | :::1::::                     |
| E | :::~                         |
| F | :5:::1:::1:::5:23:1::        |
| G | :1:::2145::a52:::7::222      |
| H | :::3:::8:::3                 |
| I | 3:1:3:1::8:::3:::2:::1::     |
| K | :::1:::3                     |
| L | 2::4:2:::2:::1:2:4162::      |
| M | :2:1:::2:::~                 |
| N | :::1:::2:::a:::~             |
| P | :::~:a:::2:::~               |
| Q | :::1:::~:1:                  |
| R | :::~:2:::61                  |
| S | :2:::13:::8:1:::1:1:::1:     |
| T | :112:2:4:::~:8:1:1::         |
| V | 51517:11:::1:2::8:::12::     |
| W | :::~:1                       |
| Y | :::5:::2:::~                 |

**Motif 3**

bits

1 2 3 4 5 6 7 8 9 10 11 12 13 14 15 16 17 18 19 20 21 22 23 24 25 26 27 28 29

MEME (no SSC) 29.06.2021 05:4

**MOTIF 3**

EEIGTFVLVYTVFAAADKRA MEME-4,  
width = 21 sites = 31 llr = 1150 E-value =  $2.6 \cdot 10^{-255}$ .

```
Simplified pos.-specific probability matrix :
A   :::::1:::1::44511::2
C   ::12::::::::::1::::::::::
D   :::::::::::::::46:::
E   a:::::::::::::::::::::
F   :2:::a:::5::4:::1:::
G   :::4:::1:::1:1::::::::::
H   ::::::::::::::::::::1::
I   :752::::::::::1::11:::::
K   ::::::::::::::::::::442
L   :::1:::193::::::::::1:::
M   :::1:::2:::::::::::
N   ::::::1::::::::::::::1:2
P   ::::::::::::::::::::22::
Q   ::::::::::::::::::::1
R   ::::::::::::::::::::62
S   ::::1::::::::::113:::::1
T   ::::9:1:::6:11242:2::
V   ::41:::515:371:3:1:::::
W   :::::::::::::::1::::::::::
Y   :::::::::::5::2::::::::::
```

|   |                          |
|---|--------------------------|
| A | :::::1:::1::44511::2     |
| C | ::12::::::::::1::::::::: |
| D | : ::::: : :::::46:::     |
| E | a: ::::: : ::::: :       |
| F | :2:::a:::5::4:::1:::     |
| G | :::4::1:::1:1::: :::     |
| H | : ::::: : :::::1:::      |
| I | :752::: : 1::11::: :     |
| K | : ::::: : ::::: :442     |
| L | :::1::193::: : 1:::      |
| M | :::1:::2::: : :::        |
| N | : :::::1::: : : 1:2      |
| P | : ::::: : ::::: :22::    |
| Q | : ::::: : ::::: : 1      |
| R | : ::::: : ::::: :62      |
| S | :::1::: : 113::: : 1     |
| T | :::9:1:::6:11242:2::     |
| V | ::41::515:371:3:1:::     |
| W | : ::::: : : 1::: :::     |
| Y | : ::::: : 5::2::: :::    |

Motif 4

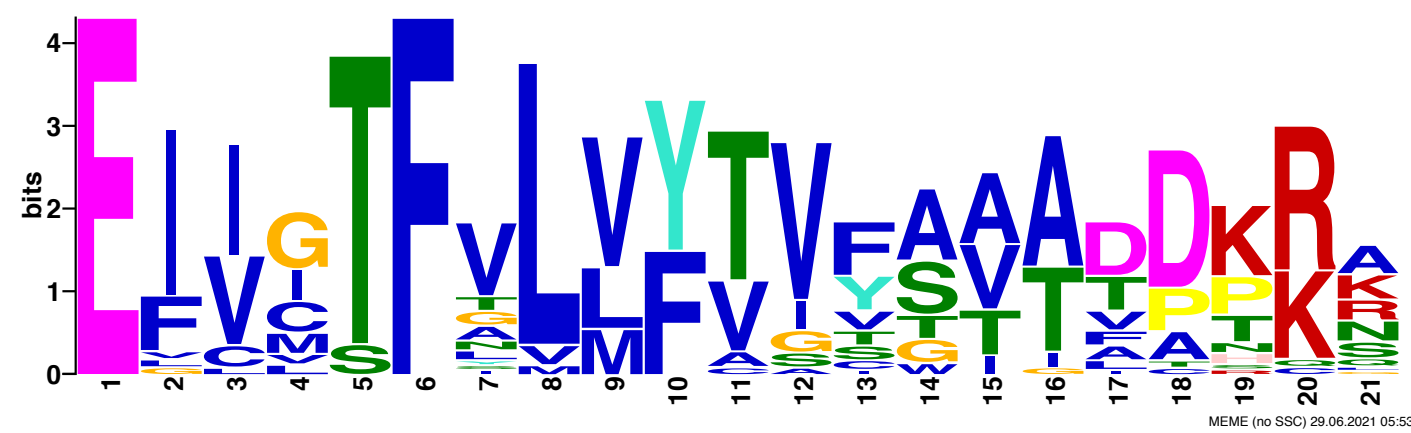

MOTIF 4

GAWDDHWIYWVGPFIGAALAALYYQIILR MEME-3,  
width = 29 sites = 32 llr = 1445 E-value = 9.4 10<sup>-312</sup>.

Simplified pos.-specific probability matrix :

|   |                                |
|---|--------------------------------|
| A | :2:::12::1263366:1::1:::       |
| C | ::::1:::1:::1:::1:::1:::       |
| D | :1:44:::1:::1:::1:::1:::1:::   |
| E | :::1:::1:::1:::1:::1:::1:::    |
| F | :::1:::1:::4:::5:::1:2:1:2:21  |
| G | 2:::3:::8:::811:332::1:::      |
| H | 2::113:::1:::1:::1:::1:::3:::  |
| I | ::::2:5:11::15::21::2:2411     |
| K | 21:2:::1:::1:::1:::1:::1:::11  |
| L | :2:::1:::11::23::34::4:::1221  |
| M | ::::1:::1:::1:::1:::1:::1:::   |
| N | 11:111:::1:::1:::1:::12:::     |
| P | ::::9:::1:::1:::1:::1:::21     |
| Q | ::::13:::1:::1:::1:::1:::3:::  |
| R | ::::1:::1:::1:::1:::1:::1:::23 |
| S | :1:::1:::1:::1:::1:::1:::1:::1 |
| T | :1:::1:::1:::11:1:::11:::      |
| V | 11:::4::7:::1:11::2:::31:      |
| W | 1:6:::9::8:::1:::1:::1:::      |
| Y | :::2:::1:5:::12:55:1:::        |

## Motif 5

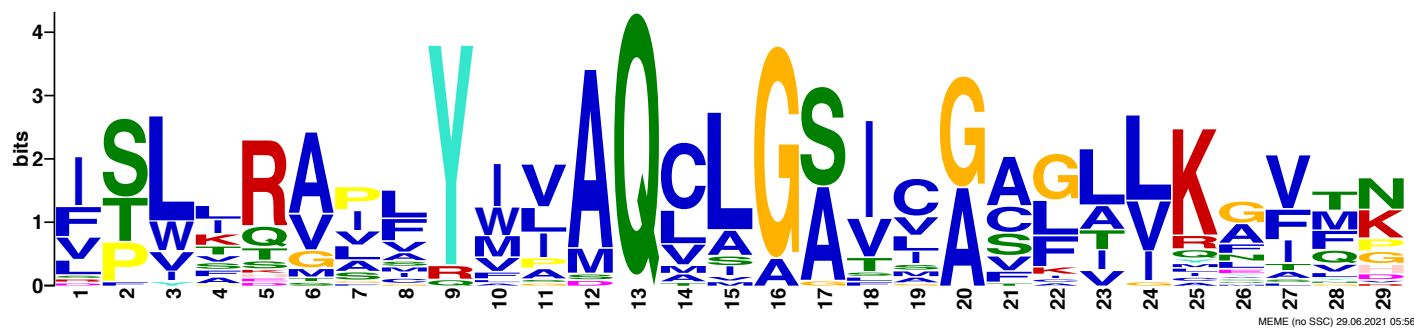

## MOTIF 5

ISLLRAPLYIVAQCLGSICGAGLLKGVN MEME-5,

width = 29 sites = 34 llr = 1433 E-value = 8.6 10<sup>-297</sup>.

Simplified pos.-specific probability matrix :

|   |                                     |
|---|-------------------------------------|
| A | :::1:511:::18:1115:154:2:::21:::    |
| C | :::1:::5:::4:2:::1:::               |
| D | :::1:::                             |
| E | :::1:::                             |
| F | 2::1:::2:1:::12:::122:::            |
| G | :::1:::9:::5:4:::3:1:::             |
| H | :::1:::                             |
| I | 4:12:::21:42:::1:::61:::12:2:::     |
| K | :::1:::1:::7:::3:::                 |
| L | 1:62:::13:::2:::27:::1:::345:1:1::: |
| M | :::1:1:2:1:1:::1:::2:::             |
| N | :::1:::3:::                         |
| P | :2:::2:::1:::1:::                   |
| Q | :::1:::a:::1:1:::                   |
| R | :::6:::1:::1:::                     |
| S | :5:11:11:::1:5:1:2:::1:::           |
| T | :3:11:::1:::1:::12:::               |
| V | 2:11:211:14:::1:::22:1:13:::41:::   |
| W | :::2:::2:::1:::                     |
| Y | :::9:::1:::                         |

## Motif 6

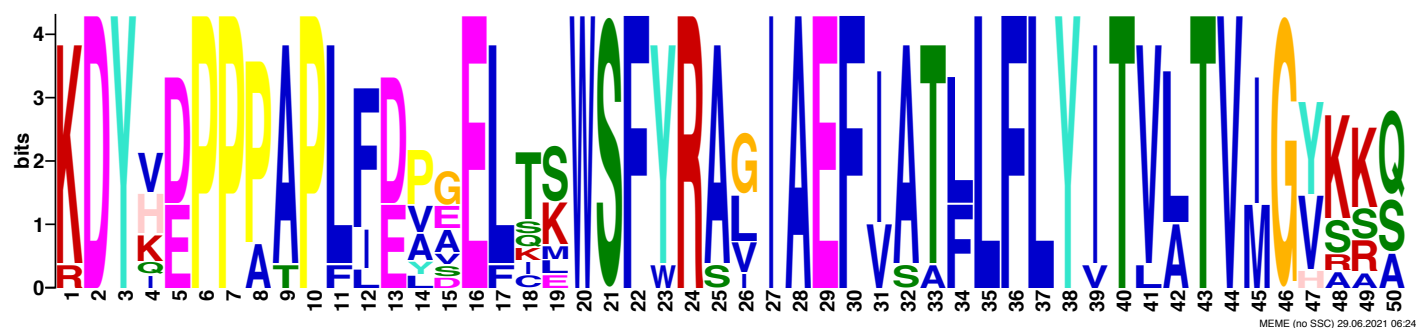

## MOTIF 6

KDYVDPPPAPLFDPGELTSWSFYRAGIAEFIATLLFLYITVLTVIGYKKQ MEME-6,  
width = 50 sites = 10 llr = 1223 E-value = 1.2 10<sup>-269</sup>.

Simplified pos.-specific probability matrix :

[illegible]

Motif 7

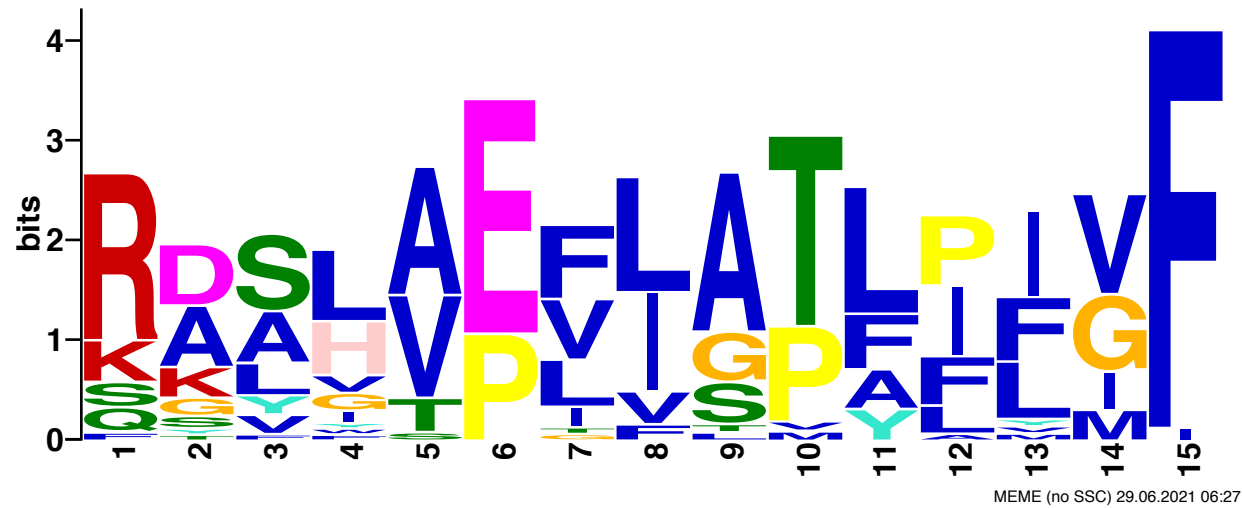

MOTIF 7

RDSLAEFJATLIIVF MEME-7,  
width = 15 sites = 32 llr = 737 E-value = 3.7 10 116.

Simplified pos.-specific probability matrix :

|   |                     |
|---|---------------------|
| A | :33:5:::6:2:::      |
| C | : :::::             |
| D | :3: :::::           |
| E | : ::::7: :::::      |
| F | : :::::31::223:a    |
| G | :1:1: ::::2: ::::3: |
| H | : ::3: :::::        |
| I | : ::1::14: ::342:   |
| K | 22: :::::           |
| L | : :24::24::513::    |
| M | : ::::: :::::1:     |
| N | : ::::: :::::       |
| P | : ::::3:::3:3:::    |
| Q | 1: :::::            |
| R | 6: :::::            |
| S | 114: :::::2: :::::  |
| T | : :::1: ::6: :::::  |
| V | : :114:31: :::::4:  |
| W | : ::::: :::::       |
| Y | : :1: :::::1: ::::: |



## Motif 8

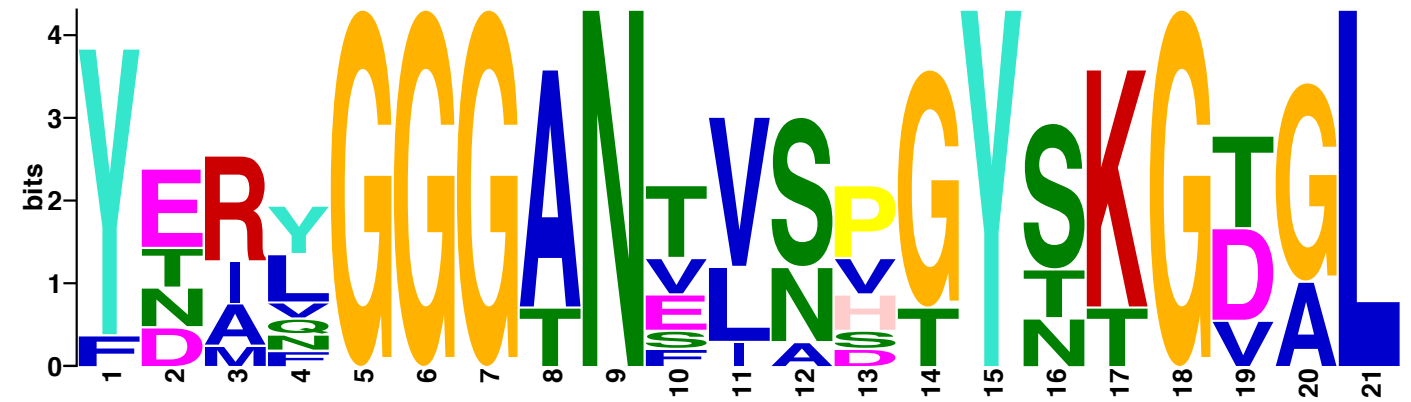

MEME (no SSC) 29.06.2021 06:30

## MOTIF 8

YERYGGGANTVSPGYSKGTGL MEME-8,  
width = 21 sites = 10 llr = 451 E-value = 1.6 10<sup>-61</sup>.

Simplified pos.-specific probability matrix :

[illegible]

## Motif 9

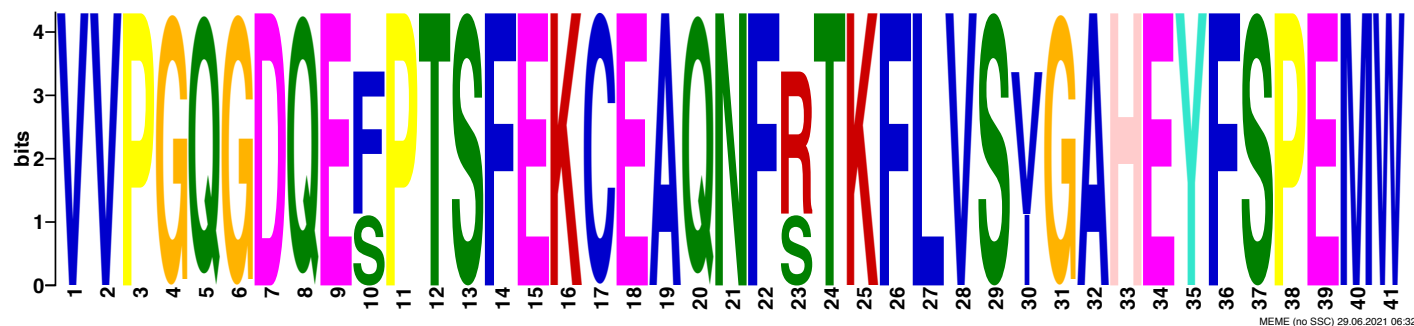

## MOTIF 9

VVPGQGDQEFPTSFEKCEAQNFKFLVSVGAHEYFSPMW MEME-9,  
width = 41 sites = 3 llr = 371 E-value = 1.6 10-050.

Simplified pos.-specific probability matrix :

[illegible]

Motif 10

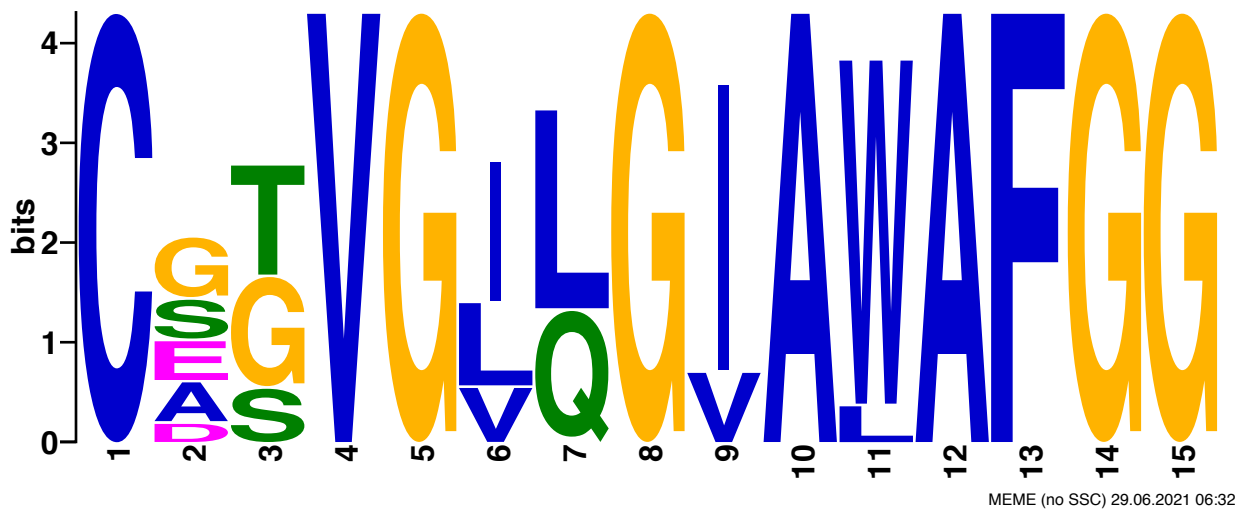

MOTIF 10

CGTVGILGIAWAFGG MEME-10,  
width = 15 sites = 10 llr = 346 E-value = 2.3 10-48.

Simplified pos.-specific probability matrix :

|   |                      |
|---|----------------------|
| A | :2:~::~~::a:a::~     |
| C | a:~::~~::~~::        |
| D | :1:~::~~::~~::       |
| E | :2:~::~~::~~::       |
| F | :~::~~::~~::a::~     |
| G | :34:a:~::a::~~::aa   |
| H | :~::~~::~~::~~::     |
| I | :~::~~::5::~8::~~::  |
| K | :~::~~::~~::~~::     |
| L | :~::~~::36::~1::~~:: |
| M | :~::~~::~~::~~::     |
| N | :~::~~::~~::~~::     |
| P | :~::~~::~~::~~::     |
| Q | :~::~~::4::~~::~~::  |
| R | :~::~~::~~::~~::     |
| S | :22:~::~~::~~::      |
| T | :~::4::~~::~~::~~::  |
| V | :~::a:2::~2::~~::~   |
| W | :~::~~::~~::9::~~::  |
| Y | :~::~~::~~::~~::     |
