# Supplementary material for: Genome-Wide Identification, Structure Characterization, and Expression Pattern Profiling of the Aquaporin Gene Family in Betula pendula
Source: MDPI journal article supplement (doi:10.3390/ijms22147269), 2021-07-06
Supplement: s1 [file s1]

**Figure S1. Detailed *Bpe*AQP sequences (genomic, CDS and protein sequences) from *Betula pendula*.**

All sequences are presented in their original version.

For the genomic sequences, the introns are in blue.

Codons "Stop" and "Start" are in red.

All sequences are classified according to their subfamily.

>FXXK01000000.1 corresponds to NCBI information

>Bpev01.c0000.g0000.m0001 corresponds to CoGe information

5 AQP subfamilies : PIP ; TIP ; XIP ; NIP and SIP

**PIP1 – Plasmalemmic Intrinsic Protein type 1**

***Bpe*PIP1;1**

>FXXK01000191.1:845000–855000 *Betula pendula* genome assembly, contig:

Contig190, whole genome shotgun sequence

>Bpev01.c0190.g0072.m0001

Contig190 850,536–851,776 (1) ::

join(850536..850869,850961..851256,851339..851479,851684..851776)

**>*Bpe*PIP1;1**

AATATTTCTCGTTTGGGCCAACATCATCAAGCACAAATTATTATGAGTAATCATACGTCTCCAGCTGATAATGCAT  
GTGTATAATAATAATTAAGACTTAGTAGTGTGTATATATATATTGTAGCCAAGCTGAAAAGACTAAATTAA  
TCACTTGGGACAATAAATTTTCATCACTTTATCTTATCGTCTTAAGCACAACAATTTTTTAAACCCATAAGCTATT  
GGTGTATTTGTGGGTGGCAGAATATAACGAATTTTCTAGATGGGCCGGGTATGCTACTTAACTAGTGATTTTCGA  
ATGAGACATATCGTAGGGTCGGCAGTGCCTGGTTTGTAAATTAGTCATCATCAGGCGGTGAGGGGCGGTCTCTTTT  
TTTATTTTATTTTGTGTTTGGTTTCTTTTATTTTATTTTATTTTATTTTATTTGTAAGATAAATTTGTAATTT  
TACAACAAGGTGGCTGAGTTATCAGCCATGCCACGTGACATCGATTGGTTTGTATGTGAATTCCTGTTTGCATC  
CAAAGAGTCTTGCCAAACAACAACAAGAGGAGCACTTCGGACAAATAGTTCTTAGGAATTTGTTTAGTACTTTT  
TGATACCCTAAAATCAGATTGGTATAATTAATTTCCCATTTTTTTATATTAAACATTGTTCAACATTGCCCTAG  
GGTTTTCTAATGTCCAAACATATTTCAATTTACTTTTCGCTAACAAAGACTTAATACAATTCAAAATTTTCAGCAAT  
TTGTTACTCGTATTGTTATAAGAGTTCTTATGAAGCTCACTTGTCCAAATAGATAAGTGGATAATTCAAAATTTG  
TTTTGACAGGTAACTTTATATTAATTTCTTGTCTTTGTTGTTCTAATTATTAGCAATCCAAACAGTAAAAAA  
TAGAGATCTCTATCTGACTTAATCTAAATTATAATAATTCGGAACATATAGGATGTTTCACTGTGATAGAAAT  
TTCAGAATTCGACTTAAAGTTAAGACCAACTTGAAAGCTCTTTAGGTATATGCTATTACAGCATACGCGTGCAG  
GACCTTTTAAAGTGCCACTATCACTTCCAACCTCTCGAAGTGGTTTCATCCAATCGTGCTTCGCCATCATTTCCAAAC  
TTTGATTGAAAGTCAAGGATAATTGCAAGTTAAATAAAAAAGCAAAGTGAGAGTTACAAAACAAAAAGACAAGGA  
CGCCCATGATGATTTTTGCAAGCCAAGAAGCCAGCTTTGATAAAGGTTGGTGGATGACTGAATACATGGATCGGT  
CGGTGGGAGGTACGACAATGCACAGTTTATGCTCTCTAAATTACTGATAAAATACCAAAATGAATTCACAACA  
CCTGCCAACCTTTGTCCCATATATACTTGCCCTACAAATACCCACACCTCACTTCACTCAAGTCTCAACCAAGC  
TTCCACAAAGCCTAAAGATAGTGAGTGCACATAGCCTTAGAGAGAAAGGAAATGAGAGGGGAAGGATGAAGATGTG  
AGGCTGGGAGCAAACAGGTACAGAGAGAGGCAACCAATCGGAACAGCGGCTCAGAGCCAAGATACCAAGGACTAC  
CAGGAGCCACCGGCGGCACCCTTCTTTGAGCCAGGGGAGTTATCATCATGGTCTTTTACAGGGCCGGCATAGCC  
GAGTTTGTGGCCACTTTCTTGTCTTTTACATCACCGTTTTTAACGGTGATGGGTGCTCTCAAGTCTCCCTCCAAG  
TGTTGCGACTGTTGGTATTCAAGGCATTGCTTGGGCTTTTCGGCGGCATGATCTTGTCTCTGCTATTGCACCGCT  
GGGATTTTCAGGTAAGAATAAGTACATATTTTTATTTGATCCGCCGGTGTGAAATTTTGAGAGGACTAATCTCA  
TTGTTTGTGTTGGGGTGGTGGTGCAGGGGTCATATCAACCTGTCAGTGACTTTCGGGCTGTCTTGGCAAGGAA  
GCTGTGCTGACGAGGGCGGTGTTTTACATAGTAATGCAGTGTGTTGGGAGCCATCTGCGGTGCTGGTGTGGTAAA  
GGGCTTCCAGAAAACAGTACGAGAGGCTTGGTGGTGGTGCCAATACCATCAGCTCGGGATATTCCAAGGGTGA  
TGGCCTTGAGCCGAGATTGTTGGCACCTTCGTGCTCGTCTACACCGTTTTCTCTGCCACCGACGCCAAGCGAAA  
TGCCCGAGATTCCCACGTTTCTGTAAAGCAAAATCTCTACGCAATGCGCATATATCTTTGTTTCTAATTTAATA  
ATGACCACCAATAAACTTTATGTTTCAGATCTTGGCGCCATTGGCTATTGGGTTTGTGTGTTTCTGGTTCACT  
TGGCCACCATCCCCATCACAGGACAGGCATCAACCCGCAAGGAGTCTTGGGGCAGCCCTCATTTTCAACAAGG  
AACAAGCTTGGCATAACCATGTAAGCCTTTTTTTTTTTAATTATTATTATTATTATTATTTTATCATTTCTTG  
TCTATTACAAGTGAAAGTTTAATAGATTGAATTGGAAGAATTTTCTTCAAAATTCGAAAATTTGGGGGAAAAATTT  
TGTTCAATTTAAACCTGAGAACAGATGTTTTGCAGAATTGACTGACAGTTTCTTGTAAATACTTCTGGTGCAGT  
GGATTTTTTGGGTGGGACCTTTTATTGGGGCAGCACTAGCTGCTTTGTACCATCAGATAGTGATCAGGGCCATTTC  
CATTCAGTCAAAAATGATTACATTATTGAAGCAATGACCTGCAAAATGGTTGGTTGGTATCTAAGTTATCCTATG

GCCTTTTCGTTTTTACCAGGGTATTTTTCTTGTATTTTCTTTATGTTTGTATGTAAACGGGCAAGCAAACAAGGTG  
ATCTGGCGTAGGTTGTGGTGGTTTTCTCCACTCGACTTCTCTCTATTGTGTTTGGCTTGTATAATATAAGTACT  
GAAAATCAAGAATGGCAGTTGTATAAATATTACAGCATTCCAATATTTACAAATAATATCATTTTTGAAGCTCTCT  
GCTTCCCTTCAATGTACCCTAAATGAGGTAATTTTGAACACTACTCAAATGCAACAAGTGTCTAGATGTGTCAAT  
TTTTGTGCACATAGTTTAGCTCAGTAAGCCGCTTCCAATCTTGTTTTTTGAAGTATTTCTATAAAAATCTCCCATC  
ATTTCTTTTATCTGGATCAGAAGTGAAAAAGATCTTGTCTGTAAACCTTTTCTCCATTCAATTAGAAAAAAAAA  
AAATGCAACAAGTTCAAGTCACAAACCTCAACAAATAATAGACAACAAGAATAAGAACATAAATGAGTCCCGAA  
AAGAACAAAGTCAGCTTGAGATCTTGTTCAAAAATCAGCTCTAAATATGAAAAATTATATGGAGTGCAAGAGCCAA  
AAATTAATGTTACACATGAGTACAATCACTACAAGAATATAATCATAATGAAAAATAAGGAGCCAAAAAAAATGTA  
ATCAAGAGCCTCTGTAATGACGGCTGAAACCGTCATTTGAACAAAAACGTGTTATTATAGCATATTTTTAGATT  
ATCATTATAATGCAATAAAAAATCCAAGCAAAAAAGCTCCAATATCATTATACACCATTTTTTTAAACACGAAGG  
TTATATTTGGTACGTGAAATGACTATTCCATTAAAAAAA

**>BpePIP1;1**

**ATG**GAGGGGAAGGATGAAGATGTGAGGCTGGGAGCAAACAGGTACAGAGAGAGGGCAACCAATCGGAACAGCGGCT  
CAGAGCCAAGATACCAAGGACTACCAGGAGCCACCGGCGGCACCTTCTTTGAGCCAGGGGAGTTATCATCATGG  
TCCTTTTACAGGGCCGGCATAGCCGAGTTTGTGGCCACTTTCTTGTCTTTTACATCACCGTTTTAACGGTGATG  
GGTGTCTCCAAGTCTCCCTCCAAGTGTTCGACTGTTGGTATTCAAGGCATTGCTTGGGCTTTCGGCGGCATGATC  
TTTGCTCTCGTCTATTGCACCGCTGGGATTTACAGGGGTCATATCAACCTGCAGTGACTTTCGGGCTGTTCTTG  
GCAAGGAAGCTGTCTGTACGAGGGCGGTGTTTTACATAGTAATGCAGTGTTTGGGAGCCATCTGCGGTGCTGGT  
GTGGTAAAGGGCTTCCAGAAAAACCAGTACGAGAGGCTTGGTGGTGCCAAATACCATCAGCTCGGGATATTCC  
AAGGGTGATGGCCTTGGAGCCGAGATTGTTGGCACCTTCGTGCTCGTCTACACCGTTTTCTCTGCCACCGACGCC  
AAGCGAAATGCCCAGATTCCCACGTTCTTATCTTGGCGCCATTGCCTATTGGGTTTGCTGTGTTTCTGGTTCAC  
TTGGCCACCATCCCCATCACAGGGACAGGCATCAACCCGCAAGGAGTCTTGGGGCAGCCCTCATTTTCAACAAG  
GAACAAGCTTGGCATAACCATTGGATTTTTTGGGTGGGACCTTTCATTGGGGCAGCACTAGCTGCTTGTACCAT  
CAGATAGTGATCAGGGCCATTCCATTCAAGTCAAAA**TGA**

**>BpePIP1;1**

MEGKDEDVRLGANRYRERQPIGTAAQSQDTKDYQEPPAAPFFEPGELSSWSFYRAGIAEFVATFLFLYITVLTVM  
GVSKSPSKCSTVGIQGIAWAFGGMIFALVYCTAGISGGHINPAVTFGLFLARKLSLTRAIFYIVMQCLGAICGAG  
VVKGFQKNQYERLGGGANTISSGYSKGDGLGAEIVGTFVLVYTVFSATDAKRNARDSHVPILAPLPIGFAVFLVH  
LATIPITGTGINPARSLGAALIFNKEQAWHNHWFVWGPFIGAALAALYHQIVIRAIPIFKSK\*

## **BpePIP1;2**

**>FXXK01000171.1:510000-525000** *Betula pendula* genome assembly, contig:  
Contig170, whole genome shotgun sequence

**>Bpev01.c0170.g0038.m0001**

*Bpe*\_Chr14 5,426,780-5,430,337 (-1) ::  
complement(join(5426780..5426875,5426970..5427110,5429613..5429908,5430010..  
.5430337))

**>BpePIP1;2**

TAAAATATATTTTATGTCAAAATTTAAAGTTGGCCTAACAATGTACATTATATTTATTTTAAATTATTTAAA  
AGACGTATCAATATTAAAGGCATGAACTTGTTAGATATATAAAATTTTAAATTTTGACCATTAAATAAAGGTAT  
ATCTATTTCAATTTCGAACGAAAAAGATCTTGTCTTGTGAGTTTATAAAAAGACTAGTAATTTAAAGTTATAGTAATT  
TAGTAAGTGTCTTTTTTTTTTAAATTTTTTGGTTAAAAAAAAGGGTGAGATTTCTCATTTTCCCTGGTTAAAAAA  
CTTGAATGCTATGATGGCCAACTTCTCTGGAATGGACCCTAAACCTAAGTACGATGCTAGAACGTTGCAAAAG  
TGTCATACATAGCCGTTGCCACGTGCTTGCACAAAGGGTGTGCTTTCCTAACGGTCACAAAACGGCCACTTTCT  
CTCAGCCATTGATTTGCTTTCCGTTTTCTCATTATTGTGTGGCTGCGATTGCTCCAAGTCTCTATCGTTGAAAC  
TTGAAAAGTAATCCCGTTACTTGGCAAAAAAGGGCAAAAATATATTTAAAAAAAAGTTACACAAGAAAAATAA  
AGAGAAACAGTCTACACAAGAGAAGATCATTTCCCTATTAAGTAAAGGTCAAAAAACAAAAACAAAAAGATTT  
AATATAAGGTTTAACTTTTCATAACATGTTAAATTATTATTTTAAAAATTTAAAAATTTTTTTTTTAAAT  
AATTTAATTAAGATTTTAAACATAGAATATTTTAAAGTAAATTAGATAAACACCCATTAGCTAAGTTGTGAACC  
CATTAAAGTTAATTAGGAGTTGGGGCTACAAAAAAAAGGGCTGCAACAGTCCAGAGCAGAAAAATGAATTC  
AGCTCAGGAGTAACATCATGATAAAGCATAACCCATAACTTGGTCTTAAAGTCCAATCCATTTTCTTCTCTTC  
TCTTTTTTTGTGTTTTTTTTTAGTCCTTGTAATGTGATATAAACCACTAATAAAGGGCTTTGTTAATATTTATG  
AGAAAACCTCATATTATTGAACCCCATCATGGATGCCATGGATTAAAGTATATAATTCTATTTTTGAGTTAAAAA  
CAAAAAGAATTGACCTTCTAATCCAAAAAGAAAAAAGAAAAAAGAGAGAAAAAGAGAGAAGAATAAAGAGTA  
AGCTTTTCATTCTTTTTTCTTCGCCTGAATGAGTGACTTTGGGAAAAAGGCAGGAGGGGCAAGCAAGCTTTCACTT  
CCTTTAAGCAACACACTTTTATAACAAGTCTGAAATTCACTGAGCTTGACCACATGTGACCACAACACCTTTAT  
TTTTGGACCTTTTTTTTTCCACAGACATTTCTTAATTAAGATTAGGTGAATGATCAAAATGGCCAGAACAGCTA  
ATCAAGTTCATCAGAAATTTCAAAATCCATCAAGAGACAAAAATATCATAAAGTATGATACCTACAAAAAAAATAA  
AAAAGTATGACACTCTGTAGAGGATAAGAACAAAAAGAAAGGCACCAACCAGAACCTGTCAACATCCCTCTGCTCT

TTCCAGAGCAATCCCCATCCCCCTAATACACTTAACTAAAAAGCAAAAAAATAATGACCAAAATTTATTAGAAAA  
ATAAAAAAGACAACCCATTTTTGCTTTCAGCTAAATAATACACTCCCCCATCTATAAAACCCACTTTAGCTTCA  
CCCTTCTCCCCACTTCACAGCCTCTGTTTTTGAGTGTGCTGAGAGAAAAATATCATCTTTTTGAAGAGAGAAAGC  
TCAGTGAGGTAGTGAACAGTAAACC**ATG**GAGGGAAAGGAAGAGGATGTTAGGCTTGGAGCAAAACAAGTACACAG  
AGAGGCAGCCGTTGGGCACAGCAGCTCAGACAGACAAGGACTACAAGGAGCCACCTCCAGCTCCTCTGTTTGAGC  
CAGGGGAGCTCTGCTCATGGTCCTTCTACAGGGCTGGGATTGCTGAGTTTGTGGCCACTTCTTGTTCCTCTACA  
TCACCGTCTTGACTGTCATGGGTGTTAAGCGCTCTAGCAGTGTGTGCTTCTGTGGGTATCCAAGGAATTGCTT  
GGGCTTTTTGGTGGTATGATTTTTGCTCTTGTCTACTGCACGTGCTGGTATTTTCAG**GTAAAA**TAGCTTCCCTGAAT  
CCCTCCTCTCTCCTTTTTCTGGGTTTTTTTTCTTTTTCTTTTTCTTTTTTATAAGTTAAATCAATTTATATT  
**AACAGG**TGGACACATCAACCCGGCTGTGACCTTTGGACTCCTCCTTGCGAGGAAGCTCTCCCTCACAAGAGCTGT  
ATTCTACATAATCATGCAGTGCCTTGGAGCCATCTGTGGGGCTGGTGTGTGAAGGGGTTCTGGGAAGACCCCGTT  
CGAGATTAATGGTGGTGGAGCCAACGTTGTGAACCATGGCTACACCAAGGGTGATGGGCTTGGTGCTGAGATCGT  
TGGCACCTTTGTCTTGTCTACACTGTCTTCTCTGCAACTGATGCCAAGAGAAACGCCAGAGACTCTCACGTCCC  
**TGTATG**TATTCTCTGCTCTTTCTTTGTATAACTTTATTTTTTGTGATCTTTGCAAGTGCTTTTGATAGCTTTTG  
AATTTGCAGGTTGATTTTTTCATGATTTCTTCTTGTGCTATTTTACTTGACTTTTTATAAGTATTTGTTTTCTG  
CAGGTTTTCTCTTTTTCTTGTGCTATTGCTTGTAGTTTGGTTGTTTGGCTGTATTTTCCCTTGAGTGGGTATTGT  
GGTGGGTTATTTTTGGGACCTGTTGCTAAAAGTTGATTATTTGATTGATTTCCCTAACTCTCCCTTTCCCTTGGTT  
TCCAAAATAAGCTGGTTTTTATTTAACAACCTTAACAAAATAATTTTTTTTTTTTTTCAAAAACCAAGAAAAGG  
TTTCTCTTTTACGAAGTAAGCTATATATATAGTCTGCATTTTTTTTTTAATAGTATTTTTTCTGATTTTTTGAAC  
TTTTGTTCTTCTTTTTCTTTTTATTATATATATATATATATCTACGGGGACTAGGGTTGCATTTTGATCTTTCTCA  
TGATATTGAATTACTTTTTAAAAAAATTGTGCTGAGAGAGAGAGATGTCTTGGGTGCTTTTAGGTGAGACCTCGT  
GGGTTTGAGACCCCCACCACATATTAAAGTATAAAAACAATTTGTCTGGCTCCTTTAGGCCTTTGGTTTCTCTAC  
TTTCCCTTATCCTCTGGTTTCTTCCCTCCGCTTTGGATTAGGAAAAGAGAAATATTGCTAGGTTTACTATTTTTTT  
TTAAAGATATGCTCGGTGTCTGCCAAGCTCTGTCTTACTTGTGAGTAATTTTTATTTTTTATTTATTTTTAAATGA  
AGTCAATTAGACGAGGTTAGACGACTTGGTAGGATACCAATCATATCTTTTTTTTTTGGGGCAATGTTAGTTGT  
ACAATCGAGTTGTCCAACCTTTCTTCGTGTTAACATGAAGAAAGTTGGACCAAGTTGGACACTTCGGTTGTACAAC  
TAGCATTGCTCTCTCTTTTTATTTTTATTTTTTCAAAAAGTTGGTTTTCCAAGTAATGTGTCAATTATTTTCATC  
ACTGCTTCTATTTACTAAAGATAAAGGCTATGTGTCTATCCATATTGTTTGTCTTTATCCATCCAATTTACGTAT  
TTTTGTCTAAAAAACAAAGATTGATGGACAAAGTGGATGGACGCTTGCTTGGCCTTTCTCTTTACTGAAACAGTA  
GATCACATTAGATGGTGACACATTATTTTTGAACTAACTTTTTGAGAAAAAAATTTGAGAAAACTAGCATTTCT  
CGAAGGGAATATTGTATACACCTAGCCAGCTCGATCAATCTTTTACCATGGATTTTAGGGATTAACGTTAATTT  
GTGGGTAACACCTTGCAAATAACAGTATCTGTTGATGTGCCAAAGAAATGGATTGGAACCTAGCTCATCTTGAT  
GTGTCCAATCTATTGTATAAAAAATGAGCTTGGTGAGTGTCAATCCATTTGGTTTTTGTTTTAAATCATAGGCTTAA  
TTTTCTTTATCAAAGTGATTATTTCCGCAATATATCATATGAGATTCAAAAAAATGTGTTCAAAATCCTTTTTTC  
ATGCTGACATGGCAGGAATTTTAGTGGAAGCTATAAATGTTGTCTCTCTGACTTTGTTCTTATAGTATTTAATTC  
CTGCCATTTCAATGTGAAAAAGGATTTGAGCTAATTGTCTGATGTTTTTCCACCGATAACTTTATCATGCAAATA  
TTCATTTTGATCAACTTTATGTTGATATATTGTCAAAGGATTAAGATAAGTTTTTTTTGTGCACTTGATGTTCTAA  
GTGGGAGTAGTTAGATAGATTGTAAGATTTTACTCGAGAAACATAGAATACATAGAAGAAATGTGCGAGAGGCTT  
AGCCTTAGCATGAAGGAATTAAATTGAGGGAGCTGGGTTGTACTTGTGTGGAAGATACAAAATGAGTTATCCCTTA  
TGGTTGATGTTAGAATATTACCATGATTGTAATAGAATATTCTCATAATATTACTATGGGCCTAATGTTGGATCG  
GTACACACGTGATGATGAGTGAACCTGCATGGGAAGTTGCTGGTTCAAGTGACACGTGAAGATTAACATACCGAG  
AATATTATGAAAATAATCTATTACAATTATGGTAATATTTTATCTAGATTGGTAACAATTTAACAGCTGAGCTAC  
CTTCTTGGCATCTTTTGGTGAGCATGGCTTCTTTACAATTTCAAATCCAATCATGGACATATATATCAACTTATT  
TGTCCATCTATCTCTGTCAATCACATGACATGTGGATGGTTTATGATTGGACTGAATTGTATATCGAAGGAGCCC  
TTCCCTCCCTCATGTGTTCTTCAACCTACCATATGTATGTGTACATTTGTTTTTAGCAGTTTTTCTGTGCTTT  
TTCTTTGTTTGAATTGAATTATTATACTGAAAAGCAACAAAAATTAATGATGCATCAAATCAATATTCTTGTCTG  
ATGTTGTATTTTTTTTATCATGTCTGCAGATTTTGGCTCCACTTCCCATTGGGTTTCGCGGTGTTCTTGGTTCAATTT  
GGCCACCATCCCCATCACAGGAAGTGGTATTAACCCAGCCAGGAGTCTTGGAGCTGCCATTATCTACAACAAAGA  
CCACGCATGGGATGACCAC**GTAA**GCATTTTGTAGTAAAAACCATTTATAATTATCTTGTGCTTTAAGTGGATGAGA  
TTTATAATAATAACAATAATCTCTCTTTGCTTGACCAGTGGATCTTCTGGGTGGGACCCCTTCATCGGAGCTGCTC  
TTGCTGCTGTGTACCACCAGATAGTCATCAGAGCCATTCCCTTTCAAGGCCAGGGGT**TAA**GATTCTTCTTGAGGCT  
TGGGGATAATATCAAACCTATCTCTCTGTTTTCTTCTTTTTCTTCTCTGTTTTACTTTGTTGTGTATTTTCAGA  
GCCATTCTTTTCATGTGTTTTGGTGTGAGGAGTTAATTATGTGTGTAAATTATATGTCAAGTTTGTGACAGCTTT  
TAATGGAGAATTCTTTAATCTTTTATGCTACATTCCCCAGCTTTTAAATGGGAATACCACTTCATTACGGGTGGG  
ATGGTTAGTTAGGACAGGTCATTCAATGTTGAATTGCTCTTTCTGTAAGAAGAAACCATGAAACAAGCAAACTAGA  
TGTTGAATTTATTGCATTTTTAACAGCCTATTGTGAAGTAAGTTTTAAGAAATGCATAAGGCTTCATCTATCCCT  
GACGTCCTTGGGAAAGCTTTATCACACCAAGTTATCACACCATGCGTTATTACTCTCAATGTTAGTCAAGTTA  
TAATTGAAGTTTTTTTAAATTTATTTATAAAGGTTAATTTTACATAGTGAAGAATCAATATATAACTTAACTCT  
GAATTCCTCAACAATCTACCTGTTCTATTAATAGAATCATGTGTTCTAAAGATGTATATCGGTTTAAATAAGTCCG  
ACGAAGGACCAACCTATTTGAAAGAAGTTTGTGAAACATGCTTAATGAATTCATCTGCTTTTAAACAAGCAAAAC  
AAAGCTGGGAACCTCTGAGATGGGTTTGGGAATATACTTCATTGGCTTTGTCCCTTTTCTTTTTTGAATTTACTT  
AGCCCTCAATCTACGTTATATTTTTTCCACTCCACTTGATGATCAAAGACTTTGTTAAGAAGGAAGTAAGAAAA  
AAAATACTAATGATCTAGCATGTGAAAGAGTAAAAGCATTTAAGGTGGTTGAGATGTTGACATGAAAGATGATGT

GCACCCATCTCAAAAAAAAAAGAAAAAAAAAAAAAAAAAGAAAAAAAAAGAAAGATGATGTGCACCTACCCCTTCCAAAAGG  
GACACCCGTACACCCCGCTGTGATGGGTTGACAATTATCCCTCAATTACTCCAAGATGCAATACCTTATTGG  
ATGAACCACCACTAGTCCTTTGGAAGCTCTCGAATTGACAAGCTCCTAACATATTTGATGACTTTATGATAGGCC  
AAAAATAGACCCTTGGCCAAATTCGGGTTGGATAGCGGATCTTTAGTATTTGGGTTAGGATTATAAAGCTCAAAAC  
TTCAAATTTTAAACCGAAAGTTAGAGCAATGAAACAGAACAAAGAACAAAT

>**BpePIP1;2**

**ATG**GAGGGAAAGGAAGAGGATGTTAGGCTTGGAGCAAACAAGTACACAGAGAGGCAGCCGTTGGGCACAGCAGCT  
CAGACAGACAAGGACTACAAGGAGCCACCTCCAGCTCCTCTGTTTGAGCCAGGGGAGCTCTGCTCATGGTCCTTC  
TACAGGGCTGGGATTGCTGAGTTTGTGGCCACTTTCTTGTTCCTCTACATCACCGTCTTGACTGTCATGGGTGTT  
AAGCGCTCTAGCAGTGTGTTGTGCTTCTGTGGGTATCCAAGGAATTGCTTGGGCTTTTGGTGGTATGATTTTTGCT  
CTTGTCTACTGCACTGCTGGTATTTTCAGGTGGACACATCAACCCGGCTGTGACCTTTGGACTCCTCCTTGCGAGG  
AAGCTCTCCCTCACAAGAGCTGTATTCTACATAATCATGCAGTGCCTTGGAGCCATCTGTGGGGCTGGTGTGTTGTG  
AAGGGGTTTCGGGAAGACCCCGTTTCGAGATTAATGGTGGTGGAGCCAACGTTGTGAACCATGGCTACACCAAGGGT  
GATGGGCTTGGTGTGAGATCGTTGGCACCTTTGTCTTGTCTACACTGTCTTCTCTGCAACTGATGCCAAGAGA  
AACGCCAGAGACTCTCACGTCCCTATTTTGGCTCCACTTCCCATTGGGTTTCGCGGTGTTCTTGGTTCATTTGGCC  
ACCATCCCCATCACAGGAAGTGGTATTAACCCAGCCAGGAGTCTTGGAGCTGCCATTATCTACAACAAAGACCAC  
GCATGGGATGACCACTGGATCTTCTGGGTGGGACCCTTCATCGGAGCTGCTCTTGTCTGTGTACCACCAGATA  
GTCATCAGAGCATTCTTTCAAGGCCAGGGGT**TAA**

>**BpePIP1;2**

MEGKEEDVRLGANKYTERQPLGTAAQTDKDYKEPPAPLFEPEGELCSWSFYRAGIAEFVATFLFLYITVLTVMGV  
KRSSSVCASVGIQGIAWAFGGMIFALVYCTAGISGGHINPAVTFGLLLARKLSLTRAIFYIIMQCLGATCGAGVV  
KGFGKTPFEINGGGANVVNHGYTKDGLGAEIVGTFVLVYTVFSATDAKRNARDSHVPI LAPLP IGFVFLVHLA  
TIPITGTGINPARSLGAIIYNKDHAWDDHWIFWVGPFIGAALAAYVHQIVIRAIPFKARG\*

## **BpePIP1;3**

>**FXXK01001700.1**:4600-7500 *Betula pendula* genome assembly, contig:

Contig1699, whole genome shotgun sequence

>**Bpev01.c1699.g0001.m0001**

Chr *Bpe*\_Chr5 1,627,018-1,628,297 (1) ::

join(1627018..1627354,1627572..1627867,1627959..1628099,1628205..1628297)

>**BpePIP1;3**

AATCCTTAAGCTTGTATACTAAGATTTTCTTAATTTTAAGTAATGTTAAGATGATTTTTTTAAGTGAAATATCTT  
AGTATAAATAGTTAAGGAATACGTTACACATCTATTATTTATTTATTTTATTTTATTTTATTTATATATAAAAAATAT  
TTAAATTTAATATTGAATTATAAGATTATACATATGATCAAGGACGGAGGGAAGGGGGCTGGTAGGGGCCCGGC  
CCCCAACAAACAAGAAAAAAAAAATTTCAAGCTTAATTACAAGTTAATTTTGTTTTTTTTACCTTTTGGCTCATA  
CCCAAATTTTTTTTTTAACCTTACCTTTAAATTTTTTTAATTTTGAATTCATACTTATTTTATCTCTCGACTCCGTC  
CCTGCATATGATCTCATAAATTAAATAAAAAATTTATACATATTTTTTAGAAGCGTAAAAATTAATAATAAAAAA  
ACAATCATTTTATCAACCAGTTAAATCTAACAAAAACAAATTCGTACACCATGTGATGATTTATGAAAGAGGAGCA  
AAATCAAGAATTGCCTATTTCTTATTAGACGTAAATGTATCGTGCAATCTTTGTTAGCCACGTATGCAGTATGCA  
ATATGCAACATGAGCTGAATTGATGTGATGTAGCCAGGAACCGACCGACCCCATGAAACTGACTTGGACTATACT  
ATTACGAAAGCTGGAAACTAAAACAGTAAACCCAACATTTTCTCGTCTTTAAGCACATGGACGGTGGACTC  
ATTCATTCAAACCTCACAGATGTATGGACGAGGTTGTGCCAAGTAGGATAATCTCTGATGTCACTTTCAACAAAAC  
ACGCGGGGGTATTGAAGTCCTTTAACATGAAACTCAGAAAATGATTGGTCCGCCGCGAGATAACAAAAATAAAT  
TCAATTAGAAATACCAACGAGGTCCACCACCTCACCTGCTTAGCCCATGATGCCTTATATAATCCCACTACTTC  
TACTCTCACCACTCTCATCGGAGAGATCAAACGTCACTCACTAAATTAATAAATCAACTTGAGAGAGAGAGAGCTT  
TGTGAGTAGAGCTAAA**ATG**GAGGGCAAGGAAGAGGATGTTAGATTGGGAGCCAACAAGTTCCCGGAGAGGCAGCC  
GATTGGGACGGCGGCTCAGAGCCAAGACGAGGGCAAGGACTACATAGAGCCTCCGCCGGCGCGCTGTTTCGAGCC  
GTCTGAGCTCACATCTTGGTCCTTTTACAGGGCTGGAATCGCCGAATTCGTGGCCACCTTCTGTCTGTACAT  
CACAGTTTTGACTGTGATGGGCGTTGCTAAGTCCCCGAGCAAGTGTCTAACCGTCGGGATTCAAGGGATCGCTTG  
GGCCTTTGGCGGCATGATCTTCGCCCTTGTCTACTGCACCGCTGGCATCTCAG**GTTTCGACACTGCAAAAACTGCA**  
**CGTTATTTTGTCTTTTTTAGTTATTATGTTTAATTTTCGGCTTTGACCCAAAAAAAACAAAAACGAAAA**  
**ACGCCCACCGTGGGGCTCGAACCACGACCACAAGGTTAAGAGCCTTGCGCTCTACCAACTGAGCTAGACGGGCT**  
**CACATGATACAGGTTGATTGATGATGGTAATTATTTTAATGGCAG**GGGGTACATAAACC CGCGGTGACGTTTG  
GGCTGTTTCTGGCGAGGAAGCTGTCTGTTGACGAGGGCGTTGTTCTACATAGTTATGCAGTGCCTGGGTGCGATTT  
GCGGTGCTGGTGTGTTGAAGGTTTCCAGAAGAGCCAGTACGAAATTTGGGCGGTGGGGCCAACTTTGTGAACC  
CTGGTTACACCAAGGGCGATGGCCTTGGCGCTGAGATTGTTGACCTTGTCTGTCTGTCTACACTGTCTTCTCTG  
CCACTGACGCCAAGCGTAGCGCCAGGGACTCCACGTTCCC**GTAAGCAATCTCACTCTCCCTCTTCCCTCTCCCTC**  
**TCTAAATATGATTTTTCTTTTTTTCTTTTGTTAACGATGGTGTATGTATTTGATCAG**ATTTTGGCACCTCTACCA  
ATTGGGTTTCGCGTTTTCTTGGTGCACCTGGCTACCATCCCATAACCGGAACTGGTATTAACCCAGCTCGGAGT  
CTTGGTGGCGCAATCATCTACAACAGGGACCGCGCTGGGATGACCAT**GTAACCATCTGATTTCTCCCATCTCT**

TAATTCTAAGAACCTATCACCTAATCAATGTTCTTACTCGTTACAACCTGTTTTGTTTTTCATATACTTTTGTGTG  
CAGTGGATTTTCTGGGTGGGGCCATTTCATTGGGGCAGCACTTGCAGCTCTGTACCACCAGGTTGTGATCAGGGCC  
ATTCCCTTCAAAATCGAAG**TGA**TGATTGATCAGATCATACAACCCGTGATGTTCCAAGTTCAAGATCAAGCCAAGC  
TTGTCGATCCAGTCTCTCCGTTTTTCTTTCTTTTTTTTTTTTTTTTTTTTTTTTTTTTTTTTTTTTTTTTTTTTT  
CTTTTTCTGTGTGTATGTATCTGTACGTAAGATGTGTAAAAGTAGGCTAGTAGCATGCTTCTTTCAAGGGCCCTTC  
TTTTCCACTATCTTTTTTGTCCAAACGGAGGTTGTTGATGGGCCCCATTTCTAGTGGGTGGGCTTTGTATGCTTC  
TGCCAGCTTGATTGTCTATCCAATAACAATGATTCTGTATGTTCAAATTGAATTA

>**BpePIP1;3**

**ATG**GAGGGCAAGGAAGAGGATGTTAGATTGGGAGCCAACAAGTTCCCGGAGAGGCAGCCGATTGGGACGGCGGGCT  
CAGAGCCAAGACGAGGGCAAGGACTACATAGAGCCTCCGCCGGCGCGCTGTTTCGAGCCGTCTGAGCTCACATCT  
TGGTCCTTTTACAGGGCTGGAATCGCCGAATTCGTGGCCACCTTCTGTCTGTACATCACAGTTTTGACTGTG  
ATGGGCGTTGCTAAGTCCCCGAGCAAGTGCTCAACCGTCGGGATTCAAGGGATCGCTTGGGCCTTTGGCGGCATG  
ATCTTCGCCCTTGTCTACTGCACCGCTGGCATCTCAGGGGGTCACATAAACCCGGCGGTGACGTTTGGGCTGTTT  
CTGGCGAGGAAGCTGTCTGTTGACGAGGGCGTTGTTCTACATAGTTATGCAGTGCCTGGGTGCGATTTCGCGTGTCT  
GGTGTGTGAAGGGTTTCCAGAAGAGCCAGTACGAAATTTTGGGCGGTGGGGCCAACTTTGTGAACCTTGTTAC  
ACCAAGGGCGATGGCCTTGGCGCTGAGATTGTTGGTACCTTTGTTCTTGTCTACACTGTCTTCTCTGCCACTGAC  
GCCAAGCGTAGCGCCAGGACTCCACGTTCCCATTTTGGCACCTCTACCAATTGGGTTTCGCGGTTTTCTTGGTG  
CACTTGGCTACCATCCCCATAACCGGAAGTGGTATTAACCCAGCTCGGAGTCTTGGTGCGGCAAT**CATCTACAAC**  
**AGGGACCGC**GCCTGGGATGACCATTGGATTTTCTGGGTGGGGCCATTCATTGGGGCAGCACTTGCAGCTCTGTAC  
CACCAG**TTGTGATCAGGGCCATTCC**CTTCAAATCGAAG**TGA**

>**BpePIP1;3**

MEGKEEDVRLGANKFPERQPIGTAAQSQDEGKDYIEPPAPLFEPSELTSWSFYRAGIAEFVATFLFLYITVLT  
MGVAKSPSKCSTVGIQGIAWAFGGMIFALVYCTAGISGGHINPAVTFGLFLARKLSLTRALFYIVMQCLGAICGA  
GVVKGFKSQYEILGGGANFVNPGYTKGDGLGAEIVGTFVLVYTVFSATDAKRSARDSHVPILAPLPIGFAVFLV  
HLATIPITGTGINPARSLGAIIYNRDRADDHWIFWVGPFIGAALAALYHQVVIRAIPFKSK\*

## **BpePIP1;4**

>**FXXK01000028.1**:937000-947000 *Betula pendula* genome assembly, contig:  
Contig27, whole genome shotgun sequence

>**Bpev01.c0027.g0083.m0001**

*Bpe*\_Chr5 22,880,015-22,885,763 (-1) ::

complement(join(22880015..22880110,22880210..22880350,22882759..22883054,22  
885436..22885763))

>**BpePIP1;4**

ACAAAGAGAGAAAACCTCAGAAAATATGCATTTAAAAAAGGAAGCAGATCAAGATTTTTTTAAAAATAATTAG  
AGTATTTTATTGTGTAGATTCTTTCAAATATTAATTATTGTTTTCAAATTAATGTTGAGTCCGAAATCCAACAA  
TAAGCTATGAGCGAAGGACTTTTCGTTGTTCTCCTCACTTGATCACTGGTGAGGGCATTGTGGTCCAATAAAAAATGG  
ACGATGAGAGAAGGGTGCGGAAGAAGTAAAAATGGGTGTGGAAACAGCACCTCCCATGATGGAAAAGTGGGACTA  
AAAGAAGATGAAAATTGAAAAGGGCCTACAGAAAGATAAGGACAGCCCAGCATCTTGGCATTGTGACAGAGTATC  
CCCGCTTTTCTCATCCATCTTTTTAGCACTTTCCAGAAGCATCTCTCGACTTAACCCACAGAAAACCCATCTTT  
TTAAACCCCGGAATTGCAACCCTAAATGGTTATGTTTGGTAAAGGATAATCCGTTTGGCTTCTTTTATTTTTTA  
TAAAAATTATTTTAAAGAAATAATCATTTAAGGGTGTTTATTTGTTTTTTTTTCTTTTAAAGTTGAGAAATTTGAA  
AAAAAATTAATTTAAGGTATTTAAATTTAAGTAAATTTAATTTCTCAACTCAAGTTATTTTCATCATTTTAT  
GTTAAAAATTAACATGCTGTGTACAGTGATTTTTCTGTTTAAATTTAAAGTGCTTGACAAATGGGAATGTTTTTT  
CATCAATTCGAAATTTTTTTAGTTTCTCAACTCAGGATATTTTCATCAATTTATGTTAAAAATTAACAAATCCGT  
GACCGTGTCACTTTTCATTTGATTGAACGTGCTCAACTAAGGAAATTGAGTGTGAAAATTGGTAGTTGGTGGGAG  
AATGTGCAATGAGTGATAATTAAGGGATTAAAGTGTAATTAATCTTAAAAAACCAGGGTTGAAACAGTTGAAT  
GAGATGTTAGTTTAAAGGGGGGAGGGGGGGCCAAAGCTTTTGTACCATGATCAAGTACTGTTCACTGACTACTATC  
TTTTCTTTCTATATAATCATTTCCACTCAGCTGTTGTTCCACATCTTCAAGCTTTAAGCTTTATCAGAGAGAAAAG  
GAGAGAGAAAAGAAAGAGTTGCAGAAGAAAAGGAAAGAAAAG**ATG**GAGGGGAAAAGAGGATGTGAAAGTAG  
GAGCGAGCAAGTTCCCAGAGAGGCAGGCCATAGGGACGTCGGCACAGACGGACAAGGACTACAAGGAGCCACCAC  
CGGCTCCACTGTTTGTAGCCCGGTGAGCTTCAGTCCTGGTCTTTCTGGAGGGCTGGGATAGCTGAGTTTCATTGCCA  
CCTTCTCTTCTCTACATCACTCTCCTCACTGTCTGTTTCCAGGGCTCCAGCAAGTGTGCCCTCTGTTG  
GTGTTACAGGCATTGCTTGGGCCTTTGGGGGTATGATCTTTGCCCTTGTACTGCACTGCTGGTATCTCAG**GTT**  
**AGACCC**CTCTCTCTCTCTCTGTTTGAATTTCTGGGCTTTTCTTTGTGGGTTTTTGTGTTTTTGAAG**AGCTTTTG**  
TGGTTGTAGATGTTGAGAAATGTACGGATTTTCTTGGTTGCGAGTTGTTGTTGTTTGGCTTTTTTTTTTTGTG  
GGATTTTGTGTTTTTGAAGAATCTTTGTGGTTCTATATGTTGAGACATGTACAGATTTTCTTGGTTCCAAGTTGTT  
TGTTAAAGGTGTTTGTTCATGGGAAATGGGAAGAAAATAAACTTGTTATAACGAGGGTAGCTTTTTTAAAGATGC  
CATGTATTCTCTTATGTCTTTTTAGAAATCAGGGGGAGGGTTGGTCGTTTTTGTAAATGAATTTTCTTTTTTTTA  
TTTGGCTGTTTGTGTTGCTGATGAAAACCTGAGAAAAGAGAATAAAATGTATAGACTAAATGGGTTTTGAGGGATC

TGTTTTATATTTTGCCACTTTTTTTTTTTAACTGTTGAGTACGTTAGGTTTTATGATGGCTAATTCGATAACTAA  
GTTTGGTCTAAGTTTAAAGATTGTTAGTCAAATTGGGTACCTCGGTTGGTGGGGCGTCTGAACGAGAACTTATACA  
AAGAATCAATAGTCTATATAAACCTCGGAGTGCAGGATTTTCCACAGACCCTGAGGCCAGACCTTTTGCATCCAT  
ACGCCTTCAATTTTATCTCTCTTAGACTTTGTTTAAACCACACAAATTCCTAAAAACCTTCAGGAATTCTGGGTTG  
CAAGAGCAGTCTCGATAGAAGAATTGGCCAGAGTTCCTGAGCTACTATGGTAGAGACAAATGGGTTGTTTGTGTGT  
GGTACACATTAGGTTTAAATTACAAAGGTTTTGTAAAGAGTAAACCATGTAAATTTATATTTCTATAATGGATGAGT  
CTCTTGGGTTTGGTTGTTCTAATGTGGTTTTACTTTTTGAAGAGTTCCTTTAAAAGGTTTCCACATTCTCACCAAAC  
TTGTTGTGCTTGATTCTTTGGTTAACTTTGGTGATTGTGAAAATTTGATTGAGTTTGCTGGAAAAACACCCATGC  
ACCCCATCTAGGTGTGTTTGGGGTCATTGGGCATAATTTTCAGAGTATACGTGTTATCGTATAAAAGATTGAGTCTA  
TCTTGGAGAGGTGAGTGGTTAATATAACACATTTTTTTTTTTTGATAAGTAAGAGTCAATTCATTAAAAAGCGCAAA  
AGCGCAGTCTTGGCACACAGGAAGTATACAAAGGACCGCAAGGGGAATAAAAAATATACAAGAAAAATCATTAAAGC  
TTATCACTAGAGGAGTTAGATAAGCAGCTGTCCAAGAAAAGAGAGTGTGAAAAAAGAAAGACTTGAGCTCCTCAA  
TCGATCTTTTTTTGTCTTCGAAATTACGATCATTTTCGTTCCCTCCAAAGACATCACATGAGGCAAGATGGCACCA  
TCTTCCACACAACAGCACTCTGGGAGCGACCACAGTCCACCAGCTGGCAAACAGGTCTATCACATGAAGAGGCA  
TAACCCACGATAACCCAAAACGGCTGAAGATAGTAGTCCATAAGGCGCTAGTAGCCTCATAACATAATTGGATCC  
AAACCTATAGGCTTAAGCTTTTTAACTTTTAGGTTGAGTGTTATTTCATCAAAAAAAAAAACTTTTAGGTTGAGTGTT  
GTCCTAACATGCAATATTATGGTCTCATTATAAGGCTCTCCAAAGTATCAATATTCTTAACAAATGATATCAAAG  
CCGATTGTTGTGTGCAGTATGGTGGAGTGGTGCAGGCACGTGATTGTTGAGTACAAACATGTGAGTGTAATAAT  
TGAGTCCAACATCAGAAAGGTCAAAGGTGTCAAGTATGAATGATTAAATATAGGATAGTTGAGCCAAACCCATA  
GGTTTAAAGCTTCTAAGTTAATTGGTGCTTACCATGCTATATTATGGTCTTTTTTGAAGACTTTCACAGCTATCA  
ATCTCCCTTCCATATGGTTTTCTGATAAATATAGGAAAAATAATTTGCATCAAAGTTGTAAAGTTTATGACTAGGT  
TGACCCGCGATGCTATGATTTGACCAAAAGTGATTCCCTGTTTTGCACGCTGATAGGAACTTGTGGATCTGGGTC  
TTACACTGTTGATCCACGAAGCTGATTTCTGCGAGTGCATTTTTGTTTTTATTATTTTACCTATATATATATATA  
AAAAAAAAGAAATTAATAAAAAAATCTATTACTAGAATTTCTGAGATTTTCCATTGGGACTGTTTTTAACATTTG  
GTTGGACTATGAGAAAATTGGAGGAATAAGGAATCAAGTACATATTAATTCTTACATTTCTCACTTAATAAGCT  
GTTACCTTTTGTCTGATTTTTTAATCAAGTGCCTTGTGTTTCATGGTTTGTCCAGGTGGACACATCAACCCAGCTGT  
GACATTTGGTCTGTTTTCTTGCAAGGAAGCTTTCTCTTGACAAGAGCACTTTTCTACATTGTAATGCAATGCCCTTGG  
CGCAATCTGTGGTGCCGGTGTGGTAAAGGGATTCCAAAAAACACAGTATGAAAGGGTGGGTGGTGGAGCCAAATGT  
AGTGAACCATGGCTACAGCAAGGGGGATGGCCTTGGCGCTGAGATTGTTGGCACTTTTCGTTCTTGTCTACACAGT  
TTTCTCTGCAACTGATGCTAAGAGAAATGCACGAGACTCCCATGTACCTGTAAGTATTACCCAGTTTCTTTGTTT  
TTTTCTATGCAATACCTGTAAGTATTTGTCCCTCATATTGTTGTTTGGATCTAGTTTGTGTACATCAAATCAAGA  
CTTTGTAATGCAAAATAGTACAGAAGAGGAAAAAATAATCAATTACACACAAGAGACACAATACTAATGTGT  
GCTCGACATAAAGGCCTACATGCAGGCAGATACAATCACAGAGAAATTTGACTGACAAAGTATGAGTATTAAGG  
TTGCGAGAAACACTCAGATCCCGAGCCTACTAACCTTAAAGCTCAATATACTAAAAAGCTTTACTCTCACAAACATG  
GTAAGAGAACCTTTTGATTGGACTCCTCTCTTTGCCATGATATAGAACGCTCTGAGAAAAACACTATACACCCCT  
ACATACATATAAAGACTAAGTTGGCTAGAGCAAGTTGGTTAAAGCCAAGTCAGAATGCATGGCCACTAAGTTGGG  
AAGGTTTTGCATTTAACTGACTCAACAATAAAGATATGCACAGTAAAAAAGAGCATTCAAATTTCAACA  
GTATATAACAGTGACTCCTACTGTAAGTCTAGATTAAAAACCAAACCTCTCAACTAATGGCCTCTTTTCATTCCC  
TTTGTGCTTAATAATTTGTGGTGATGTGGCTTGAATGGTATGGGAATGTATGGTTTGGGTTGCCAAACTATTAT  
ATACTTATAAAAGGCTATTACCTGCGTACAAGTTCTCCTTGAAGTAGATGATGCCTTTTCTTGTCCCTTGATAGGCA  
TGCCAAGCTTTGGGTGGTCACTCTTGTACTCCACTCTACCCTTTTGTGATATTTGGGCCTATTGGAAGTCTT  
ACGTGATAAGTGCAAGGACAAGCTTTTGTCTGAAGTTAGCAACAATACTAATGTGTGAATGCTTTTTGTTGGGTTG  
TGTTGTTTCCACAACCTCTTGTATACATGTCTTATGCACAAAGACATGCATCAGCCACTAGTTGCATGATTTGCC  
AACAAACACATGGTTGGTTTAACTTGGTTTGTCTGTGAGATAATATACATAATATAACAATATTTGTGCAAGTA  
GCATTTTTCAATACAAAAAGTGCATTCACTTAATAATTTTTGTGGAACCTCACTAATGATTGATTGTTGTGTC  
ACTGCTCAGTTTAAATGTAGAGGTCCATCCACATAGTTTGAATTGATGTTTGTGTTTAAATTTTGCATGTGGGGTT  
CACATGTATGCCTGTTGAGTGCCTGCTTGTGTTGATGGTTTTAAGAACCTTTTGAAAAAGATACACCGCTGGTTAG  
CCAGTACTTAGGGACTGTACTCTGCATGTGAACCTTTGACTAGGTTCAATGCCCTAGACTAGTCATAGTTTGAAGTT  
TCTTTTAATGTATTAATATATAGAGCCAAATCAATTTATTGGGACCACATGTCTTTATTAATACTCTGTTAATGGA  
CTTAACAAAGTCTAGGTTTTGTTTCTGGATAGATTCCCAATCTAATGGGATCGTTTAAAGAGGAGGGCAACTAGC  
TTATGATGGGCTAGGTGTGAGTGGGATACATGCGTGTGTTGTATGGACACACACAAAAATTATTTCAACTCAAAAT  
ATTTCAACTAAGGCATTGTGATGATCATAGGTATAAAGTATAAACCTGTCTGAAAAAGATGGTGTTAGGGGTCAGC  
AATTTGGGGTTGAAATCGAAATCAATTGCTGTGAGGTGTAGTGTAGCTTGAAATTGAAATAATGGTGAGTACTTT  
GAATGTTTTAAGCCAAACATTCTACATGTTTGCATTTTTTTCAGTCAAACATTCTGCATGTTTGAAGCTTGTATTC  
TTTTTAGAAAGAGCACTTAATTTCTACTCCTTGGAAGAGGACCAAGCTAATCTATGAGCTTGTCTAGTCTCTAGT  
CAGAGAGATGTTGCTCTTGTAAAGTAGCTTGAAGCAAGACTTAATGCAATGTGTAATAATCAAGCATAAGTTTGG  
ACTCGCATGAATTAATACAGAACCTCCACTTGGAACTGACTTTGGGATAAAAAAATTTGACTTATAAGCTAG  
TCCTACTTCGTACTTGGTTTTGATTTGTGTTTACTCCTTGTGTAATATTAATTAATAATTTACATTTTATTATTTT  
CTATTAACCTTTAAGCTTTTCGAAATAAGTAGTGATTCAACATAGGATCAGAGTAAAGATTTTAAAGTTTGAACCTTG  
TCTTTATTAATTTACCTTCTATTTCAATTAATAATTTTACGCTGTGGTCTCAATTATTAAATAAAAGTTTGAATTT  
ACACGTGAGGAGTAGTGTTAGAATACTAATTAACATAATTAACCTTATCATTAAATTTGCTGCTAGCTACTATTACT  
TTCTTGCCTTACAAATATGCTGGTCATAAACGTCTCCTTGTGTTGAGTTCAACTGCAGCTCTTGGCTCCACTTCCA  
ATTGGGTTTGCAGTGTTTTTGGTTTACCTGGCAACCATCCCCATCACAGGAAGTGGCATCAACCTTGCTAGGAGC

CTTGGGGCTGCCATCATCTACAACAAGGACCACGCATGGGACGACCAGGTGAGTAAAAAGTGTTTTATGATTGCA  
TACATTCACCTTCTGGATGCGTGGACATGTGATTTATAACTGAAGCGTATGATGTGTTTGTGTCGTGCTTCAGTGG  
ATCTTCTGGGTGGGGCCGTTTCATTGGAGCTGCACTTGCTGCCCTTTACCACCAGATAGTTATCAGAGCCATGCCA  
TTCAAAACCAGAGCC**TGA**GAACTCGTGTATTTTCGTCTTCAATCTTGTGTTTTGCTCTGTTTGGATCATGTTTGAC  
CCGTCTTCTCTTTATTAATGTTGAGAGTGGAATTGATGTGATGTTTATGTGCATAAGTAATCTGGCTTTGTGAC  
AGTGGACAACCTTTTTTTTTCTNCAGTAGACAACCTCTTAACCTGTAAGTCTTGTTTAGTACGCAAAATGATTATT  
TTATTAAGAAAATTAATAGTTATTATTTGAAATGAAAGAATGCGGAATAAATAACTATTTATATTCTTTAGTTTG  
ATAATAACACATATGTTTTTCATTGAAATTATATCAAAATTATTAATAATATCTAAAAAAAACACTAATTAAAAAA  
AAAATCCCTAGAAAAAGTTTTTGGTGGCTGACCACCCCATCATGGAAGAACCACAGGAGTGGTTGTACAACCCC  
TGATTTTTTTCGGTTGCCCCGGTTGTTTTTCAGTGTATGGGTATTTTGATTATGTTGAAATTTTTTGGTAAGCGGA  
TGGGCGAATGAAAGGTTGATTTTAGGGCCTTGATTGTTGTTCTTGCTAATTGTGGATGGTTGAACTGGGAGGTA  
ATGATTTTGGTGGAAGTCGATTTTCGATTGAAGAAGGTTTGATTTCAGTTGGCTTAACATATTGGGTGTTATGGAA  
TCTCGATGGCTGATGAATTATGAGTTGTGAATTGGCCGAAGGGCCGATTATGCAAAGGTTCTGTAGGATAGTTTA  
CTGGGTTTCATATTGTGGAACCTGGGTTGTGATGGTTTTAGAAATTGATTGCGCCGAAAATTTGAGTAGTAATT  
GGTGTGGGTTTTTTCGGTAATTTTGGTAGCTAACCGATTGGAGAGAAGGGGCAGATTGGTAGCTCTTTTGTTTTG  
TTTGGGTTGTGCTGTGGACGATTTTCGTAGACTGAAAGGAAAGAAATTTTTGGAGTTGATGGGAATTTTGGATGTT  
CTTGAAGGTCTGTTATGGTGTGTTAATTAACGTGCCCTTGGGCATATGGAGGGAGCATATACACTACCCTGAA  
GTTTTCTCTATCTTTACAGCCATGCTTAGTAAGGCTGTC

**>BpePIP1;4**

**ATG**GAGGGGAAGAAGAGGATGTGAAAGTAGGAGCGAGCAAGTTCCAGAGAGGCAGGCCATAGGGACGTCGGCA  
CAGACGGACAAGGACTACAAGGAGCCACCACCGGCTCCACTGTTTGAGCCCGGTGAGCTTCAGTCCTGGTCTTTC  
TGGAGGGCTGGGATAGCTGAGTTTCATTGCCACCTTCCTCTTCTCTACATCACTCTCCTCACTGTCATGGGTGTT  
TCCAGGGCTCCCAGCAAGTGTGCCTCTGTTGGTGTTCAGGGCATTGCTTGGGCCTTTGGGGGTATGATCTTTGCC  
CTTGTTTACTGCACTGCTGGTATCTCAGGTGGACACATCAACCCAGCTGTGACATTTGGTCTGTTTCTTGCAAGG  
AAGCTTTCTTGACAAGAGCACTTTTCTACATTGTAATGCAATGCCTTGGCGCAATCTGTGGTGCCGGTGTGGTA  
AAGGGATTCCAAAAACACAGTATGAAAGGGTGGGTGGTGGAGCCAATGTAGTGAACCATGGCTACAGCAAGGGG  
GATGGCCTTGGCGCTGAGATTGTTGGCACTTTTCGTTCTTGTCTACACAGTTTTCTCTGCAACTGATGCTAAGAGA  
AATGCACGAGACTCCCATGTACCTCTCTTGGCTCCACTTCCAATTGGGTTTGCACTGTTTTTGGTTACCTGGCA  
ACCATCCCCATCACAGGAAGTGGCATCAACCTGCTAGGAGCCTTGGGGCTGCCATCATCTACAACAAGGACCAC  
GCATGGGACGACCAAGTGGATCTTCTGGGTGGGGCCGTTTCATTGGAGCTGCACTTGCTGCCCTTTACCACCAGATA  
GTTATCAGAGCATGCCATTCAAAACCAGAGCC**TGA**

**>BpePIP1;4**

MEGKEEDVKVGASKFPERQAIQTSQTDKDYKEPPAPLFEPEGELQSWSFWRAGIAEFIAITFLFLYITLLTVMGV  
SRAPSKCASVGVQGIWAFAFGMIFALVYCTAGISGHHINPAVTFGLFLARKLSLTRALFYIVMQCLGAICGAGVV  
KGFQKTQYERVGGGANVVNHGYSKGDGLGAEIVGTFLVYTVFSATDAKRNARDSHVPLPLPIGFAVFLVHLA  
TIPITGTGINPARSLGAIIYNKDHAWDDQWIFWVGPFIGAALAALYHQIVIRAMPFKTRA\*

### **BpePIPlA-like**

**>FXXK01000380.1** :39453-39706 *Betula pendula* genome assembly, contig:  
Contig379, whole genome shotgun sequence

**>Bpev01.c0379.g0007.m0001**

Chr Bpe\_Chrl4 13,436,305-13,436,932 (1) ::  
join(13436305..13436468,13436863..13436932)

### **>BpePIPlA-like**

AAACAAAACAAAAAACAACAACTGGACTGGCTGTGCTAGATTTCATAATTTAATGATGAACTAGCATATCACATTGC  
AGAGAGATTTCAGAAATTTAGCTTCACCCTTATCCCCACTTCACAGCCTCTGTTTTTGGAGCGTGCTGAGAGAAAAAT  
AGCATCTTTTTGAGAGAGAGAGAGAGAGAGAGAAAGAAAGCTCAGCATTGGTAGTGAACAGTAAAC**ATG**GAGGGC  
AAGGAAGAGGATGTTAAGCTTGGAGCAAACAAGTACTCAGAGAGGCAGCCGTTGGGCACAGCAGCTCAGACAGAC  
AAGGACTACAAGGAGCGACCTCCAGCTCCTCTGTTTGGAGCCAGGGGAACCTCTCCTCATGG**GTGTTAAGCGCTCTG**  
**GCAGTGTATCCATATGTTTCACTCAAAAGAAAAAAGAAAAAGAAATGGTTACGGACTAATGAAATGTGTGATGGA**  
**GTGGAAAAATCTTTAGGATGCTTTTCATGGATGAGATTTAGGACATAAAAAACATTGTCACCACAGAAGAGATCTC**  
**TTGGGTGATCATGTCT//**

### **>BpePIPlA-like**

MEGKEEDVKLGANKYSERQPLGTAAQTDKDYKERPPAPLFEPEGELSSW

### BpePIP1b-like

```
>FXXK01000008.1|:31941-32239 Betula pendula genome assembly, contig:
Contig7, whole genome shotgun sequence
>Bpev01.c0007.g0002.m0001
Chr5          15,083,781-15,094,079          (-1)          ::
complement(join(15083781..15083934,15086266..15086354,15093924..15094079))
>BpePIP1b-like
ATGCACCGCACTACTACAGATTTCCCATCTATACGCGCGACCATAATAGCCTTGAGGCTACACCTGCTTTTCCC
CACTCTGAGAACCACCACCATGATTGCCACCACTCTCCATCAGCAGCAACAAAGAACCATCGGTGCGATAGG
AGTCCATGCGGCGTAGCGCAGCACAACACAGCTAGTTCGTGGAGCTGGTGCGGTGCGGCGAAGCTAGTCCGTGGA
GGTGGAGCTGGTGCGGAGAGAAGAAGCAAAGAAAGAAATGAGGGGAAAGAAGAGGATGTGAAAGTCGAAACGACC
AAGTTCCCAGATAGGCAGCCCATAGGACCTCGGCGCAGACGGACAGAGACTACAAGGAGCCACCACCAGCTCCA
TTGTTTGTAGCCAGTGAGCTCTAG //
>BpePIP1b-like
MEGKEEDVKVETTKFPDRQPIRTSAQTDRDYKEPPAPLPFEPSEL*SWCFWRARVDEFIRDLLERERNVCVLELGV
```

## PIP2 – Plasmalemmic Intrinsic Protein type 2

### BpePIP2;1

```
>FXXK01000659.1:65175-71398 Betula pendula genome assembly, contig:
Contig658, whole genome shotgun sequence
>Bpev01.c0658.g0014.m0001
Bpe_Ch3,complement(join(19090629..19090748,19090840..19090980,19091085..19
091380,19091486..19091774))) Genomic Location: 19090629-19091774
```

### >BpePIP2;1

```
GAATTTCAACCTTGCAATAAGCTTAGATAAATTTCTAGAATTATAGTCGTAATAGCAAACGAGAGCGAGAGAGTGG
TTTCTGACTTAGTACCTTGTTCTTGATACCATGTAAATTAACATTTTGTGCATAAAAAATTTAAGTTAATAAAAAAT
AAAATTTTATTTTTTCTTGGTCCTCTACAACCTAGAGAAAAGTTATCTCAAACCTATTAGAGCATTTCCCGAGACC
AATGAATTACATTCGGCTCAGTAAATGGTAAATATATGGTGAGTTGCTACAATATCCACCAGATTTGGTGAGC
TTGGTTCACCTACCAAATGTGAAAAAGAAAAAAAAAATTAATAAATCTACACTATTTTTTCTCATCTCAAAGA
AAGAATAAAAAAATAAATGAAATGTATATTTAAAGTCAATAGTTAAATAAAAAATTTAAGAGAAAATCTTTCC
ATAATTTTTTACACGTTTTTGAAATACCTTTTTTGATATTTTGATTTTTTCTCACTTTGACCTTTCATCTTCAAAA
TATTTTCATTTAGCTTCCATCTGTAAAGATTTTCTTTAAATCCTAACGAAGTAGTGCAAAAATTTATCAAAATACC
ATTTATTTTAAATTTTTTTTATAATTTTTTTTTTAAATACACGAATTTTTTTTATAATTTTAATAAGGTTTGACGA
TAAAAATATGCAAAAAGGGCTAAATAATATAAATTAATAAATATAAAAAAGTAAAGTAAAGAAATCAAAATATCA
TAAAAATATTTTAAATGCATGAAAGTTTGACGGCTTTACTAAAGTTTTCCTAAACTTAATGTAAATGCAGTAG
TCTCCTTTGCGTTTAGCAATATTCATTGACATTAGCAAAAATCCACATCGGCAGCAGCCCCCATCTTGAAAT
AACCCTTTAGGCTTTTCTAGTTTCTAAGCATGCACTAGTGCCCTTCATTACTCTTAACAAAAACCCAAAAG
GCCTTTTGTAGTTGTTTAAACATGGTCCTACTGAATTAGGGTAGTCTCAAAAAAGTAAAGAGGGTTGCCCTAAAAG
AGAAGACAGGGGATGGCAAAAAGACAAGAAATAACCGTTGTAGGCGTGCGCTCAGGCGTGCGCTTTGGTTGGATGC
CAGGCTGACTCATGAGCCCTACCCAGAGAGAGATGATTAGCCCTCACATGGTCTTCGCTGTACACCTCGGTCCC
ACTCCACGTCCTCCACCCCTCTCTAAACCTAAACCTAATCCTCTGAAAAAACTCTTCTCTATTTCCCAACCAT
TTTATTTTCTACATATTTTATATTATATATACATAGCTGATAGCACCACTTTATATTCCCAACTGCCCATTTGGC
TTATCCATATAATGCACCATTTCCCTACCCCTCTTACACTCTTTATAACTCTCTCTCTCTCTCTCTCTCTCTCT
AGCTCACAAAAGTTCCCGAGAAACAAACACAAACCAACAGAGAGAGCTTCACAAGGAGTACTGTGTGAAAGAAATC
AGAAAGATGTCGAAGGAAGTGAGCGAAGAAGGGCAGAGCCACCAGCATGGGAAGGACTACGTGGACCTCCACCG
GCACCACTCCTCGACCTGGCCGAGCTCAAGCTCTGGTCCTTCTACAGATCCCTCATTGCCGAGTTTCATCGCCACC
CTCCTCTTCTCTACGTCACTGTGCGCACTGTCTCGGCCACAAGAAGGCCACCGGGCCCTGCGATGGCGTGGGC
CTTCTGGGTATTGCTTGGGCCTTCGGTGGCATGATCTTCGTCCTTGTCTACTGCACCGCCGGTATCTCTGTAA
AACCACCCCATACCCCAACAATGCTTGAAATTTTCAAACTCTCTTGTGTTGAAGTAATTTTGTGATGGGTTTT
TGCTTTTGTGTTGCTATATATGCAGGTGGGCATATCAACCCGGCTGTGACGTTTCGGGTGTGTTCTTGCCAGGAAG
GTCTCGCTGATTTCGGGCTGTGTCTGTACATGGTGGCGCAGTGCTTGGGAGCTATTTGCGGTGTTGGGTTGGTCAAG
GCTTTCATGAAGCAGACTACAACATGCAAGGCGGTGGAGCTAACTCTGTAGTCCAGGGTACAGTACCGGCACC
GCCTTGGGTGCTGAGATCATCGGTACCTTTGTGCTCGTCTACACCGTTTCTCAGCCACTGACCCAAAGAGGAGT
GCTCGTGACTCTCACGTGCCTGTATGTAACCGTTTTTCACTTTTTGATTTCTTCATGTTCAAGTAATTCGTTGCC
```



TATTTTAGGCCATGTGGTAGAATACGGTTTTTCATGTTTGTCTGCGTGCAGGTGTTGGCTCCACTCCCTATTGGGT  
TCGCCGTTTTTCATGGTGCACCTTGGCCACCATCCCCATCACTGGAACCTGGTATTAACCCAGCTAGGAGCCTTGGTG  
CTGCTGTTATCTACAACAACGGCAAAATCTGGGATGACCAA**GTAAAGTATATATACACTAACAGGCACATCCGGGT**  
**GAATTTGTGAATTTTTTTGGAGTTACTAACAAGTGGGTAAATATATGTAATGTGCAGTGGATCTTCTGGGTGGT**  
CCGTTTGTGGGAGCACTGGCTGCAGCGGCGTACCACCAGTACATACTGAGAGCAGCGGCGATCAAGGCTTTGGGA  
TCCTTCCGCAGCAACCCAACCAAC**TAA**AGGAGACAAAGACAAAGCAACCAACCGAAACCTGAATGAAAACTTTCT  
AAAATGTCTCATAATTTTCTCTTTTCTCCACTACTATTTGTTTGTGTTGCGTGTATGAGATCGAGGATGTTGATGA  
TGATTATGATGATGACCCCTTCTTCTTTTCTTTTCTTTGTTTTTATTTTTTTTTTATTTTTTTTATAATTTAATCTTTTA  
TTGTTAGCATTGGATGTGTATCATATATTGTTTCATGACTAGTGATGATGGTGGTGCTCCTTTTTTAATCCCTGTT  
GTTGGACTTCTCTCTCTCTCTAATCTTCTCCCTAATCTTCTTTTCGTTATGGTCTGTTTATTCTAATTTCTCTGA  
CAATAAAAAGGATTTAAAACCAATTAAGTCTTCATTTTGTGAAACGACAAAACGGTGCGCTTATAGGGGTTTT  
AACGTCAGATATAATAGGATCGAGTGGGTTTTAGCCCTTGGAATCTCCCTAAAGACAAGCCACGTGTCCTTCCAG  
GAGCACACCTGGGAAGGGCCAAAGATGCCCTTAAAGCTTTTAATGGGTCTGATACCCAGCTTTCTCTCTCACTCT  
CCCTCCGAAAGGTCACCTGACATATTCTGGCAAGCCAAAGTGTCTTACTGTAGTGTCGCTTTTAGGACAAAGGTC  
CAACCAATGGGACGAAGCGAAGAAAAAGCAGAAAATGAAAGAGGATGGGATTTCGAGGATGTGCCACGCTGTGAG  
GGGCCACGTGTCATGGGACCATAGGATAGCATGTTCATGGCATCACATGGGTGGGTAAAGTGGG

>**BpePIP2;1**

**ATG**TCTGAAGGAAGTGAGCGAAGAAGGGCAGAGCCACCAGCATGGGAAGGACTACGTGGACCTCCACCGGCACCA  
TTCCTCGACCTGGCCGAGCTCAAGCTCTGGTCTTCTACAGATCCCTCATTGCCGAGTTCATCGCCACCCTCCTC  
TTCCTCTACGTCACTGTGCGCCACTGTCATCGGCCACAAGAAGGCCACCGGGCCCTGCGATGGCGTGGGCCTTCTG  
GGTATTGCTTGGGCCTTCGGTGGCATGATCTTCGTCCTTGTCTACTGCACCGCCGGTATCTCTGGTGGGCATATC  
AACCCGGCTGTGACGTTTCGGGTGTTCTTGGCCAGGAAGGTCTCGCTGATTTCGGGCTGTGTCTGATGGTGGCG  
CAGTGCTTGGGAGCTATTTGCGGTGTTGGGTGGTCAAGGCTTTTCATGAAGCAGCACTACAACATGCAAGGCGGT  
GGAGCTAACTCTGTTAGTCCAGGGTACAGTACCGGCACCGCCTTGGGTGCTGAGATCATCGGTACCTTTGTGCTC  
GTCTACACCGTTTTCTCAGCCACTGACCCAAAGAGGAGTGCTCGTACTCTCACGTGCCTGTGTTGGCTCCACTC  
CCTATTGGGTTTCGCCGTTTTTCATGGTGCACCTTGGCCACCATCCCCATCACTGGAACCTGGTATTAACCCAGCTAGG  
AGCCTTGGTGCTGCTGTTATCTACAACAACGGCAAAATCTGGGATGACCAATGGATCTTCTGGGTGGTCCGTTT  
GTGGGAGCACTGGCTGCAGCGGCGTACCACCAGTACATACTGAGAGCAGCGGCGATCAAGGCTTTGGGATCCCTTC  
CGCAGCAACCCAACCAAC**TAA**

>**BpePIP2;1**

MSKEVSEEGQSHQHKGKDYVDPPAPLLDLAELKLWSFYRSLIAEFIATLLFLYVTVATVIGHKKATGPCDGVGLL  
GIAWAFGGMIFVLVYCTAGISGGHINPAVTFGLFLARKVSLIRAVSYMVAQCLGAICGVGLVKAFMKHDYNMQGG  
GANSVSPGYSTGTALGAEIIGTFVLVYTVFSATDPKRSARDSHVPVLAPLPIGFAVFMVHLATIPITGTGINPAR  
SLGAAVIYNNGKIWDDQWIFWVGPFVVGALAAAAYHQYILRAAAIKALGSFRSNPTN\*

## **BpePIP2;2**

>**FXXK01000578.1a**|:150836-155543 *Betula pendula* genome assembly, contig:  
Contig577, whole genome shotgun sequence

>**Bpev01.c0577.g0022.m0001**

Chr *Bpe*\_Chr9 1,816,676-1,817,768 (-1) ::

complement(join(1816676..1816786,1816869..1817009,1817105..1817400,1817480.  
.1817768))

>**BpePIP2;2**

AGCCATGGTTCGTCCAGCCAATACACTGGATTTATCCAGAAATGCTGGAATTCAATCACGAACAGATTTTCTCCCA  
ATAACATTAAACGTACAACCTCCCGAAAGCTTCCACCCCTTCGCAAGAGTAGATTTTATAATCTCCTTGCTTACT  
ACTCGGTTCAGCCATAAGTTTTTCCAACCACACATTGTTGTCTTCGAGTGACGTTATCTACAAGCTCCTCCACCTGA  
ATCTCCAGGCCACATTCTCCTCCTCCGTCAGAGAGAATTTTCCCAAGAGTTTGACAAGTCGTTTCGCCACAGAA  
CCCATAGCAGTCGTCTCTGTCAATGATAGTCAACCCCTTCAGAGATGTCCACCCGTATAAACTAAAGACAAAAT  
CTGAATTCTACTTCTCAGTCCTAAAAGGACGAGAAAAAACTTTTCTTCTCCTCTAGAACCCTCCAGAGAGAAAAAC  
TCATGCACGAAGCCTTAAATTTATTACAAGTTGGTATAACCACATGAACCTATTATATATATTTTCCATTTGAAAA  
TTTATAGGGAGGGCGGGCTCCATGACTAAGCCAAATAGGCCACGTCTCAATTTATAAAAAGGCCCTTAAAAAGGC  
CTTTTATTTATATAAAAATTTGTCAAAAAGAAAAAGTGA AAAAGGGTAAAAAGGCCTTAAAAATAAAATAAAGA  
AGAGGTCATTTGTTATGCGCGCTATGAGGGTTTTTTTTTATAAAAAAAATCTAACTAAATTAAGCACTATGCACTC  
TGTTTTTTATATTTATTTTATCTTATTTTCTTTTATCGCTTCTAATCGTTTGTGTTTATTGGTTATATCGTTCTTTA  
TTTTTTTTTGATATTTTATATGTTATACCTTCAATCAGATGTCAATTGATTTTGTGTTTTCGGTGTATATGAGTTTCA  
TTCACGTAATGATTTTATAGTAAATTTTACATCTCAAAAAGTTAGAACGATGATTTTAAATTAATTTTATAGATA  
TTTAGTCTAAAAATTTCTTATATTAATTTTATAATTA AAAATAAACCATTTTTTAAATTTTGGCAATCCACAAC  
TTTTATTAAGCCTTTTCTTCTTCTTCTTCTTCTTACGCACATGACTAGATTTTATAATTAATTTACAACCTTGATT  
TATTGGAGCTATATCAATCACTAAAAATGATTATCACTCTCAAAATCACATAATGACATGTTTCAACAAAATTTTTT  
AAAAATGTAAATCAGTTGTAAGTCTAACATATATTATTGTGCGAGAACAAATACAAGACCATGTTGTGTAAATC

ACGAAGTTCTTCATGTTTCGCATTGAAAAAAAAAAGAAAGAAGAAAAAGTGAAAGTGATATTTGGTGATCGAACA  
ACACTAACAGACAATGTGGTTGTTCCATCAGCATAATCTCAATCAGTGTAGCGCCTGTACGTATAAGGACGTACA  
CAGTTTTTAAGCACTAAAATTGCACATTACGTCTCTGACATTCTTGAAGATTTTTACTGCTTTCCCGATTAAACAG  
ATGGATTAACAAAATCGTGGGCTGAGCATTACACTGGGTAATCAAAATAGTCAAAAAAGTTATTTTGATTAATT  
GAAAATAGTAAACAACCTTTTTTCATTTCGTCTAATCACTTCAGCTAAGAAATTGGTTAATTGATACAGTATTCAAC  
AAATTTTTTAGTACGTATAAAAAAATTAATAGAAAAAACAATTGATTTTCATTTCTTTTGGGTATAGTTAAAA  
CAGATTAAAAAATATTTAAAAATTTAATAATAAAAAATAGATAGTTACAATATTGTGCAGCATGTAGGTGCACAAA  
AAAAGTTTCATAACTTTTTTTTTTAAAAAAGTATTAATTAATTTTAACCAATATTCGTGTGGCGGCCGGGA  
TGTGAATGTTACGTACATACCATCATTATCTCTTGATTTTGCAGTAAATTCTCATCAAAATAAAAAACAAAAAGA  
TGCTAATTTTGTCTTCGTTTTGAAAAATTAGACTTAGGTTACGAGTGACACTTCAGCTTGCCAATAACCTCTAGC  
CAGAACCGCCCGGACTAGAAAAGATGCTCTGCCTGCTGCATCGATCCCATTGTTCCTCAAAATCTGTCAATC  
AAGTTCTCATTGTCTTCAGTAGCGAAGGACAAAGAGAGAACGTACAATTTATAAGAGCTAATCTATTGCATGC  
TCTAACTTGAGTCTTTTAAAAATTTTATGAAGATGTCGAAGGAAGTGACTGAAGAAAGAGAAGCTTCTCAGCCG  
GTGAAGACTACGTTGATCCACCAGCAACACCACCTTTTTGACGTAGCAGAGTTTACTATGTGGTCCCTTTTACAGA  
GCAGTTATCGCCGAGTTTCATTGCGGCCCTTCTCTTTCTCTACATAACTGTGCGCCACCGTTATCGGTTACAAGAAG  
CAAACCGATCCATGCGAGACAGTTGGCCTTCTGGGCGTCGCTTGGGCGCTTGGGGGCATGATTTTCGTTCTTGTT  
TATAGCACTGCAGGAATATCAGGTTTATTTCTCTATTTATTTTATTTAATAGATTTTTCACGACATATATATGCT  
AATTAATTAGTCATATATATGTACAGGTGGTCATATTAATCCAGCCGTGACGTTTCGGTTTATTCCTGGCACGAAA  
GGTTTCGTTGATAAGGGCGATTGTTACATGGTGGCTCAGTGCTTGGGAGCAATATGTGGAGCAGGGTTGGTGAA  
GGGATCATGAAGGAATCCTACGATGCTTTTGGAGGTGGCACGAACACCGTGCTCTCAACCTACTCCAAGGGAAC  
CGCTTTAGGAGCTGAGATTATTGGGACTTTTCGTACTTGTCTATACAGTCTTCACTGCCACAGATCCTAAGCGAAA  
CGCACGCGACTCCTACGTCCAGTAATTAAGTAGCTTTAGTTTCTAAGTCGTTTGAAATTTATAACGCCAACCTC  
GTACTAATAACTAACATATATATTTGTGTGTTAAATGATAGGTTTTGGCTCCCTTGCCAATTGGGTTTGCGGTA  
TTTATGGTGCATTTGGCCACCATCCCCATCACAGGCACAGGAATAAACCCAGCTCGTAGTTTGGGGTTGCTGTA  
ATCTACAACAACGACAAAGTTTGGGACGATCAGGTCAGCTTAATTTTAGCACCATCGATTAATTGATCAGACTTT  
TGATTTGTTGTTGACTGAACGTGGTGATGGTGATAAATAGTGGATTTTCTGGGCGGGACCTTTTGGCGGAGCGCT  
CGCTGCAGCACTATATTATCAGTTTATTCTGAGAGCCACCGCCATGAAAGCTTTGGGATCGTTTACCACCAAC  
TAGGCCAATATTTCTCCTCACTTCTCAGTTTGTTCCTCTGTACTTTTTTTTTTTGGTTCCCTCTGTACTTATCTATGT  
GTACAGGTGTATGTGATTTTTTTTTTTTTTGGTTCTTTCTTGTGTGTATAGTTATCCTCGTACTAATCTATAAAAT  
TAAATAAAAAAAGTCATCCTCGTACTACTATTGATGATTGATGGTTACGATCTTGGTTGTGGGGTTACTACTA  
TCTCGATCTCGTGTTGTGTTCTGTTCTGGGTGTTCTCAAAATATTGGATGGTGCGTCTAATATATATATATATAT  
AATATATATATATATATATAGACACACGCGACGTTAACATAGAACTGATTAGATCGATGTGAAAAATGAAAGTAG  
TGCAGCATAAGTTAAATGTTTGACAAGGAAGATAATTATATATATATATATTTTTGGACGTTGGTTGGATTGCGGG  
TAAGCTTTAAATAAGAAGAAAATTATCGGAGTGCTTAGGCCGATGGCTAGTGGAAGAGCCTCAGCATTTTTGT  
CTCAACGAGGAAATTTCTTTTGAGAGAAGAACATACCTGAGTTATGGGGACAAGGGATCTTTTCTTTGAGGCTTC  
TTTGGAGCTCTTTTGAACTTTTATGAGAGTGGGCCTTACTTCGGCCGGGTATTGGCCCTTGGGCTCAGACTTAT

>BpePIP2; 2

ATGTCGAAGGAAGTGACTGAAGAAAGAGAAGCTTCTCAGCCGGTGAAAGACTACGTTGATCCACCAGCAACACCA  
CTTTTTGACGTAGCAGAGTTTACTATGTGGTCCTTTTACAGAGCAGTTATCGCCGAGTTTCATTGCGGCCCTTCTC  
TTTCTCTACATAACTGTGCGCCACCGTTATCGGTTACAAGAAGCAAACCGATCCATGCGAGACAGTTGGCCTTCTG  
GGCGTCGCTTGGGCCTTTGGGGGCATGATTTTCGTTCTTGTTTATAGCACTGCAGGAATATCAGGTGGTCATATT  
AATCCAGCCGTGACGTTTCGGTTTATTCCTGGCACGAAAGGTTTCGTTGATAAGGGCGATTGTTACATGGTGGCT  
CAGTGCTTGGGAGCAATATGTGGAGCAGGGTTGGTGAAGGGGATCATGAAGGACTCCTACGATGCTTTTGGAGGT  
GGCACGAACACCGTGCTCTCAACCTACTCCAAGGGAACCGCTTTAGGAGCTGAGATTATTGGGACTTTTCGTACTT  
GTCTATACAGTCTTCACTGCCACAGATCCTAAGCGAAACGACGCGACTCCTACGTCCCAGTTTGGCTCCCTTG  
CCAATTGGGTTTGGCGTATTTATGGTGCATTTGGCCACCATCCCCATCACAGGCACAGGAATAAACCCAGCTCGT  
AGTTTTGGGGTTGCTGTAATCTACAACAACGACAAAGTTTGGGACGATCAGTGGATTTTCTGGGCGGGACCTTTT  
GCGGGAGCGCTCGCTGCAGCACTATATTATCAGTTTATTCTGAGAGCCACCGCCATGAAAGCTTTGGGATCGTTT  
ACCACCAACTAG

>BpePIP2; 2

MSKEVTEEREASQPVKDYVDPPATPLFDVAEFTMWSFYRAVIAEFIAALLFLYITVATVIGYKKQTDPCETVGLL  
GVAWAFGGMIFVLVYSTAGISGGHINPAVTFGLFLARKVSLIRAICYMVAQCLGAICGAGLVKGIMKDSYDAFGG  
GTNTVSPTYSKGTALGAEIIGTFVLVYTVFTATDPKRNARDSYVPVLAPLPIGFAVFMVHLATIPITGTGINPAR  
SFGVAVIYNNDKVWDDQWIFWAGPFAGALAAALYYQFILRATAMKALGSFTTN\*

### BpePIP2;3

>FXXK01000578.1B:153006-168500 *Betula pendula* genome assembly, contig: Contig577, whole genome shotgun sequence  
>Bpev01.c0577.g0023.m0001 (next to Bpev01.c0577.g0022.m0001)  
Chr *Bpe*\_Chr9 1,830,657-1,832,603 (-1) ::  
complement(join(1830657..1830767,1830849..1830989,1831922..1832217,1832315..1832603))

### >BpePIP2;3

TAATGTCCGATCTAGTGGTCATGATCACCCCGTGTGGTGGTTGCAAGTGAGTGATACATCAATCTTCTATATCGGC  
GCACTTTTGTAGAAGTAAAAATAGTGTTTTACATATTTTAATTGGTATTCTATTTAATATTTTATAATGTTAGCAA  
AAAATTATTTGGAATTTATTTAATAGAGTACTTTAGTAGCTTGAAGGTATTGAGTACGTAATATTTTTCGATTTA  
ATGGAGATTAGTATGTAATATAAAACAAAAAAGAATATGATGTAATTAATTTTCATAAAACCTCTAGCGAGGTGT  
AATTTTCCCTTTTGTAGTATTGGTATGTTTATCATAATTAACCAGTAGACTTTGAAAGTGCCGCACTGCCGCCAC  
TATATTCTACATCTCTATCATCTGGCAATACATCAATATCAATGATTAAAGTTAAAGCCATTACACAATTTTGTAG  
AATTAATATTAATGAAGAGCTAATTGTGGAGAAGGAATATGCCGATAGAAAGTAGGAATATCTTTTGCTTGCCAT  
GCACAAAAAGTATTATAATTAATACAAGTGTATGAGATTAGGTAAATTAGTAATCTAGCTTATTGAATAGATACT  
TCTTCTTAATTTGTTCCACTCACTATAATTTTCTTAGTAAGTATAACATTATAATATTGTACGAACACTACAAGA  
CCATTTCTTATAAATCACGAAGTCTTTCACGTTCCAAATTAATAAAAAAATAAAAAAATAAAAGAAAAAGAAAA  
AGAAAGAAAGATGTGAAGGTTAAATCATCCATATGCATGAAATATATGACTTAATTATTTAATTAATATTTTAAC  
ACATTTTATTATTGAGGTTCAAACTCTATTTTAAATAGTGAGACTTAAGGTATAAAATATTTAACTAATCAAAAT  
AAGAGATGAGTGACAAAGATAATTAAGTTTAACTCAAGATCTTGCTCTCATATCACAACTTATTCAAAAAAC  
TTAAATTGATAAAAAATTCTAACATATAACAACCTCTCAAAAGAGAATGTGATCGATTAAATTGGTCTATCAGCAGAA  
TCTCAATCATTGTAGTAGTACTGTCCAGCCTGTCTGTATGAGGATAGAGTTTAAAGCAATAAAATGAATATTA  
TTTCTCGACATTCTTGAATATTTTACCTACCTGCTTTCACGATTAAAGAGATGAATCAACCAATGGTGGGT  
AACCATCACTATCGTTTGAATTTACGAGTAAATCTTGTCAAATAAAGGTAACAAAGATGCTTTCGTCTTCATTT  
GAAAATTGAACCTAGCTGAGGGTACTATACGAGAGTGACACTTCAGCTTGCCAATAATCTCTAGCAGAACCGGGA  
CTAGAAAAGATTCCCTGCCAGCATCACATTTGTTCCACTAATATTCTATAGCATATGCTCTCTCTCTATTTACA  
ATTTTCTCGCACATAAATTCAATCTTCCACTCACACCTCATCAACTTCTCAGTGTCTTAAAGAACAAATTTATAA  
AGATGTCGAAGGAAGTGACCGAAGAAGCAGAAGCTTCTCAGCCGGTGAGAGACTACGTTGATCCACCACCAGCAC  
CACTTTTGTAGCTAGAAGAGCTTACTGAGTGGTCCTTTTACAGAGCAGTTATCGCCGAGTTCATTTGACCCCTTC  
TCTTTCTCTACATCACCGTCGCCACCGTTATCGGTTACAAGAAGCAAAACGATCAATGCGAGACAGTTGGTCTTC  
TGGCGCTCGCTTGGGCCCTTTGGGGCGATGATTTTTCATCCTTGTTTATAGCACAGCAGGAATATCAGTTTATTTA  
TCTATTTATTTTATTTAATATATTTTTCACGACATATATACATGAGTAATGCCTAGTCATATTTATCTTTTG  
GATATAAGTACAGGTGGTCATATTAATCCAGCTGTGACTTTCGGTTTATTCTAGCACGAAAGGTTTCGTTGATA  
AGAGCGATTTGTACATGGTGGCTCAGTGCTTGGGAGCAATATGTGGAGCAGGGCTGGTGAAGGGCATCATGAAG  
GACTACTACGATGCTCTTGGAGGTGGTACGAACACCGTTTCTCTACCTACAACAAGGGAAGTCTTTAGGCGCT  
GAAATTATTGGGACTTTTCGTACTTGTCTATACAGTCTTCTCTGCCACGGATCCTAAGCGTAAAGCACGCGATTCC  
CACGTCCCAGTAAGTATAGCTTTTTTTTTTTTTTTTTTTTTTCTTTTTTCTTTAAATTTTAAATTTATATTTTA  
ATTATTATTATCATTAGTATTATTATATTAGAGCATTAGCAGCAGCTTCCCTTAAACTCCATTTCTTCCCTAGT  
GTAGGGAAAAGTGTAAACAAAAAATACAAAAAGTCCCTGCAGCAGCTTCCCTAAGTGTTTCTTAAACTATAGA  
AACACCAAGGGAACCACTTTTGGTTCCCTTGATGAAGGGAACCAAAAGTGTTCCTTAGCATTATTAATAATATAA  
AAAATTTCTCTCTCTCTACCATTTGTTTAAACAATATTTAAATGATTTCTCTTCTCTCTCTTCTCTCTAG  
CATTTAATTTAAATAGTATTTAATTCATGTAGGGAAGATGAAAGGAAGCTGCTATGTAGTGCATTTAACTAGGG  
AATAAAAAATGGTTTTGTTCCCTACATTAAAGAAAGCTTAAGGGAAGCTGCTGCTAATGCTCTTATATAGAAG  
TGCCAGTAAGTGGCTTTAGTTTCTAAGTCTAATTCGAATTTTATATGGCCAACCTCGTTAGTTATTAACATAACA  
TTCGGAATTTGGTATTGGCGTTGGTAATATGGATATAAAATTTTATATGTTAATCTTAAATTAATTTGACCTATAC  
AATTAGATAGGTTGGATTCTCGACTCAAATTACACTAATTTTGATTAATAATTTATAAATTTATATAAAAAATTA  
TAGCCCTTAGGTTGTATGTCAATATCAAATTTAGGTTTTATCGAAATATATAATTAATTAACATCAATATGACC  
TATTTAATTAATGAATAATATCTCTTTTAAATTTTATCTACAAATTTTATTAGTTCGTTTAGTCATACCGG  
CCCGTATTAATAACTAACATTTTGTGTGTGAAATTTGTAGGTTTTAGCTCCCTTGCCAATTGGGTTTGGCGTAT  
TTATGGTGCATTTGGCCACCATCCCATCACAGGCACAGGAATAAACCAGCTCGGAGTTTGGGGCTGCTGTAA  
TCTACAACAACGACAAAGTTTGGGACGATCAGGTCAGCTTTTGTAGCTCCATCGATTAAATTGATCAGACATTTGATT  
TGTTGTTGACTGAACGTGGTGATGGTGATAACAAACAGTGGATTTTCTGGGTGGGACCTTTTGGCGGAGCGCTCG  
CTGCAGCACTATATCATCAGCATATTCTGAGAGCCACCGCCATCAAAGCTTTAGGATCGTTTACCACCAACAGG  
CCAAGATTAGTCCCTCACTGCTCAGTTTTTCTCTGTACATATCTATATATGTGTGTTGTACAGGTTTATGAGA  
TATTTTCGTTTGTCTTCTCGTGTGTATGATCATCTCGTACATGCTAGCTATTGATGATTGGTGGTTACGATG  
TTGGTTGTGGGGCTACTATCTCTCGTGGGTGCTCTCTCAGATATTGAATAAATTTGGATTTGTGCGTCTAAT  
ATATATCTCTTTGGTGTGCATCAGAAGCATCGGATGAATGATGAATCTGTATTCTTCATGTTCCACCACACACA  
CACACACACACACACACACATATATATATATATATATACAATTTATTTTGTATTTTTTCTACTTTGTGTAA  
GTTTTATTTATTTATTTTAAATAAGTTATCCGCTAGCTACAAAAGGACTTTTTTTCAGTGAGCATGTCACAGTTAAT  
TACTCTTATTTTTTTTCAACTTTTTTTTTTTTTTAAAGATAAAGAAACAACTTCTATATTCTCTCGCGTAGATTG

ACATCACACAGCATCAATCATACGTACGCTCGTCCGCAGCATCAATTCATGAAGCTTCTTTATTAATTTTTTCGT  
CATTAAATTTAGGGCGTTTCATAACGCGCACACGTTCTCTTGTGGAGTAACGTACAATACGTCACTCCTCAAGAAGA

>**BpePIP2;3**

**ATG**TCTGAAGGAAGTGACCGAAGAAGCAGAAGCTTCTCAGCCGGTGAGAGACTACGTTGATCCACCACCAGCACCA  
CTTTTTTGACGTAGAAGAGCTTACTGAGTGGTCCTTTTACAGAGCAGTTATCGCCGAGTTCATTTGACCCCTTCTC  
TTTCTCTACATCACCGTCGCCACCGTTATCGGTTACAAGAAGCAAAACGATCAATGCGAGACAGTTGGTCTTCTG  
GGCGTCGCTTGGGCCCTTTGGGGGCATGATTTTCATCCTTGTTTATAGCACAGCAGGAATATCAGGTGGTCATATT  
AATCCAGCTGTGACTTTTCGGTTTATTCTAGCACGAAAGGTTTCGTTGATAAGAGCGATTGTTACATGGTGGCT  
CAGTGCTTGGGAGCAATATGTGGAGCAGGGCTGGTGAAGGGCATCATGAAGGACTACTACGATGCTCTTGGAGGT  
GGTACGAACACCGTTTCTCTACCTACAACAAGGGAAGTCTTTAGGCGCTGAAATTATTGGGACTTTTCGTACTT  
GTCTATACAGTCTTCTCTGCCACGGATCCTAAGCGTAAAGCACGCGATTCCCACGTCCAGTTTATAGTCCCTTG  
CCAATTGGGTTTGGCGTATTTATGGTGCACCTTGGCCACCATCCCCATCACAGGCACAGGAATAAACCCAGCTCGG  
AGTTTTTGGGGCTGCTGTAATCTACAACAACGACAAAGTTTGGGACGATCAGTGGATTTTCTGGGTGGGACCTTTT  
GCGGGAGCGCTCGCTGCAGCACTATATCATCAGCATATTCTGAGAGCCACCGCCATCAAAGCTTTAGGATCGTTC  
ACCACCAAC**TAG**

>**BpePIP2;3**

MSKEVTEEEAEASQPVRDYVDPPAPLFDVEELTEWSFYRAVIAEFISTLLFLYITVATVIGYKKQNDQCETVGLL  
GVAWAFGGMIFILVYSTAGISGGHINPAVTFGLFLARKVSLIRAI CYMVAQCLGAICGAGLVK GIMKDYDALGG  
GTNTVSPITYNKGTALGAEIIGTFVLVYTVFSATDPKRKARDSHVPVLAPLP IGFVFMVHLATIPITGTGINPAR  
SFGAAVIYNNDKVWDDQWIFWVGPFAGALAAALYHQHILRATAIKALGSFTTN\*

## **BpePIP2;4**

>**FXXK01000043.1**:236200-249239 *Betula pendula* genome assembly, contig:

Contig42, whole genome shotgun sequence

>**Bpev01.c0042.g0019.m0001**

Bpe\_Chr5 4,990,578-4,993,085 (-1) ::

complement(join(4990578..4990697,4990811..4990951,4992381..4992676,4992779.  
.4993085))

>**BpePIP2;4**

TTATCCCTCCACTGGAAATGTCCGTTACTTTGCACTGGCTACTGTGGGGGCTTGGCTGGGCTGGGCCCCGTTTCCC  
AAACGTTCCACAGCCAAACCGCCAAGCAATCTGAAGCCACCAGTTTACCACCACGTGATGTTTTTCTCTC  
TGAAATCTCAACCACAAAGTGAATCTCAACAACCATCCACGTCCACTCTTTCCCTAAATCCCACAGTTCAAAGA  
GCCCCCTTGGCATTGTTGTGTTTTGGCCTTTTGCATCATCAGTCATGAATCTTCTTTCTTTTGCTACACGTATTTT  
TTTTTTATCTCAGTAGTGGATTTTCGACAACCTGTTTTGAACTAAACACTGTTTGGTGCTTGCCATGCCGTACGGC  
TACGTTTTGTGTCCACCGGTTCTAATTTTTACGTGTCTGTCTTTGGCACGGGTTCACCCATTGGCTAATGAT  
TCTTATATTATTGGTCTCATTAATTGGTAACATAATTATTTTTACTTTTTTCATAGGCTAATAGGTAGTTAAATCT  
TTTACATCAAGAATGTCATTGGTCTTCGGTGCATCTTATTGTGTGTATAATAGACAAACAGCTAGGCCGTATAGA  
ACCAAACTGATATTATCGTTGAGAGGGATGAATTGATAGTTTTGGTTCATGTGATTTTCATTTTGTAACAAATAA  
TTCCACGAGGTTTGAAATGGACTTATAAATTCATGTGGTATGTCTATGTATAAAAAACAAATGATCAGTTTCATAAA  
TTTCAAGCATTTTTTTGATAGTTTTTAGGAAGTTGCACATTTATCCTTAAATAAATAAATAACAAAAAAGAATAA  
AGAAAAAGAAACAAAATTTGGTATGAGATGGCTGAACCATCTTTATAGCCAAACCTGCTAGAGGAGATGATCAA  
ATCACCTCCAAAAAATGAGGTAATTCGACTACCTCAAAATTGAGCAGTGAGGGTGACTAAACCATCTTAATG  
CTATGAAGATGGTTCAACCACTCTTAATACCAGCCGTCGAGGATGACTGAACATACTAAAGTTATTGAAGATA  
GTTTAACCATCCACAAAATCATGTAGAGGGTTAGCCAAACTGCCCTTAAGAGCGATGAGAATTGTTCAATCAC  
CCCTATAATTGGTTTTTCAAGAATGATCGAACTACCAACTAAGGTCTTTAGATCAAACCATAACAAGCCGACCACC  
TCCCAACCAAGTTTTGTTTTGTTTTGTTTTCTTTTTGGGTTTTTATACTTTTTTATTATGAATAAAATTTGTA  
ATTTACGAAGGTGCTGTTGAAGAAGTGGTTGGGAATTTATCCGGATGTATCATTTTGTGTCATAGACGTACATC  
CGTGATTTACAAATTTATTTTAAAATACATAGATTTCTTTGTTACAAAGTCAAATACTGCTAGATCAATTTAATA  
ATTTTGTTTTAAGATATGATAGTATATATGTTTAGGGATGATATTTCTTTTATTATTATTATTATTAGATAATC  
TCTTGAATCTCATCTAGTATCTGTTTAGGCGTTAATTTGTTAACGATCGAACGAGTAAGATAAGACAGTCTTACT  
TGTACAAGAGGTAATCTATAGGATTTTTAATCCACATTCTAAGATTCAAGGCTACGATCATACTCGGTCCGTACG  
CATTAGATAATTACAGAACAAGAAAAAACAACAAACAGCCGTATATATAGTAAGTGCGATGCAGAAAGACTTG  
CCAGTACATGCATGACAGATAGAGAGAGAGAAGAAATGGGGTAAGTGCGGGTTGGCGTGTTAAAGTCAGGCAGGG  
ACCGAAAGAGACCAAAAAGCTAGTGCTTAGTGGCTCTGCTCAGGCCTCAAATTGCAGTAATTAATGTTTTTTTTT  
TTTTCTTATATTTTATAAACGGGTAGGAGGGCTACTCTAGTTAGACTTACCATAGTAGCAGTACATTTACTCG  
CAAGGCTATTATTACAGAAAAAGTCTGGACAGTAAAAACTGCAACACTCTTAATCCTTATTGCGGGGCATTGCTA  
AAAAAATAAAACCTAAACAATAAAAAATCACAAACAAATACTTTTTTTTAAAGACCAATTGAACTATACCTTGAAC  
CGTCCAACCAACACACCAAAAGGACGATTTTCAAATACTTCCCATTTTTTTTTTTTTTTGAACGCCAAATACTTCC  
CATTTGAGAGTGAGTCTTGGATCGGGAACCCACATGATACTCGAATGCGACTAATCCCTCGGTGGTAGTAATTA  
TGTCTTAATCCCTACTGTTTATACCAAACTCCTTGACTAGTCCCTCCTTCACTGATTCCTCTTCTGTATATAT

ACCCACAGCGCTCACGTCTTCCACACCCAAAGCTTCTCTTTTTTGCTTGCTGTTAGTCTTGAGCCTCTGCTTA  
ATTTCTTCTCTCTTGCTTGTTTTCTTTTGGGTCTTATA**ATG**GCCAAGGACGCGGAGGTGCCAGAGCATGGCTCTT  
TCACGGCGAAGGACTACCACGACCCACCTCCGGCGCCGCTCTTTCGACGCCGTGGAGCTCACCAAGTGGTCCTTCT  
ACAGGGCTTTGATAGCCGAGTTTATAGCCACTTTGCTCTTTCTATATATCACAGTGCTCACCGTGATAGGGTACA  
AGAGCCAAATTGACCCCGCAATGACGGCGAAGCCTGTGGTGGGGTCGGCGTTCTTGGTATCGCTTGGGCCTTCG  
GAGGCATGATCTTTGTTCTTGTTTACTGCACTGCTGGGATTT**CAG****GTGGATTTTTTTTTTTCATAATTACTTTT**  
**TCCTATTTTCATAAATACATTGTGGGGGCTTTGGTAAATTTATTAATTATTATTTTATTGTTTTACGCAG**GGG  
GTCACATTAACCCGGCGGTGACGTTTCGGGCTGTTTTTGGCTCGAAAGGTGTCGCTGGTGCGGGCGGTGAGCTACA  
TGGTGGCTCAGTGCCTGGGAGCCATCAGCGGTGTTGGGCTAGTGAAAGCCTTTAATAAGGCGCACTACACTAGGT  
ATGGTGGTGGTGCCAACACGCTGGCTGATGGGTACAGCACAGGCGTTGGATTGGGCGCGGAGATCATCGGGACCT  
TCGTGCTTGTCTACACCGTGTTCTCTGCTACGGATCCCAAGAGGAATGCTAGAGATTCCCATGTTCCG**GTACGCA**  
**CCTTAACATTCTCCACTTTTTAGGGTTTTTTTATACTTAAGCCATCAATATATCATGCTAATCATGGCATAAACA**  
**CATGGTAACTTTTACCAGATATTTGGTTAATATACGAGGACTAGGATTTCTTCGAATTTTTGAAGGTTAAATCTT**  
**AATTATTGGACCAATGATTGAGATTTGCCATATCAATAGTTATCATTTTGGAGATAAATATGGTAAGTATTGAG**  
**GTGATAACGGGTTTTCTTATTTAGAAAGTATTTTAGTTTTCTTCCCAAACATAAAACCCCTCAATGGAAGAGTAGTAG**  
**AAGGAATTTGTTGCAAATAATCGTAAAAACAAAACAAATTAACCTGCCGTTCTTTGAGCTATTTCTCCTCATGT**  
**AAAGGCTTCACATGAAGAGAACGTGATCCTCAATGTAGCCGAGTTCTTTAAGCTTTTAATTTCTGGGAAAAATATA**  
**TTACTTGTATATTTCCCTCATAATCTCTTGCCCAACCCAAACAAAGAGTCGGAGCAAATGGTAAGAAAGTTATGA**  
**GAGGAATCTCCCTGCCGAGCTGGGAAGCTCCGTCCAAACAGAAGAAGCAGAGAGTCGGTCAAGCCTTACGTAT**  
**CCTTGCTCTAAAGAGAAGGGATAGGGATAGGGATAGGATAGGGATAAGGGATCTGCTTGCCCAACTAG**  
**CTCGGAGTATGGGGCTCACATGCCCGGAGCAAGCGTCCCGAGCCCTTCTCTTTGTGGGGCTGCCTGCATAGA**  
**TGGAATATGGGGTGGCTGGTAGGGGCCGTGACCCCGTCGGCTCTTTCCTCCACAAAAAAAAAAAAATTA**  
**AAAAAAAAAAAAATTTTAAATTTGTTGGCCGCTGAATAAAATTTTGATATACTTATGGCTCCTCTCAAGTTAAA**  
**TTTTAGTTTCGCTCACTGACCAAAAAAGGTAGCCAAGCAAATTTGGAGCCGATCCTGACAAGAGGGTGAATCATGAT**  
**TTTGCATTAAATTTTTCTTTTAATTAGTTTTGTGGTGGGAAAATTGTGTTGATTTCCTGAGATATTTACGAGGG**  
**GGTAATGTAGCATGAGCCATGCGGTGGCTAAGGTGGGTCCGTGGACAAGCATATGCATATGCACGGGACAACATA**  
**TTTTTGTTCCTTCCAAAAAGTGATTCTCCTTTTCCAATGCGTGAATACGCCTTGTTGTTTTCTCACCAAGGACA**  
**GTAGGTGGTGGCTTTGAGTAAGGTCCGAAATGAATGGCTCAAAAAAGTAGAAAAAAGAAAAAGAAAAAAG**  
**AATGTTCAAAATAAATGCGAAATGTCTTTTGTGCATCTCTCAGAGTCAGGGAGCTATTGTTTTCTTAAAGATTAT**  
**CTTCAATATAATGATCTATTATTATTATATGTGAATGTTATATTAACATTGTGTACTTGTCTTGACCTCAAG**GTT  
TTGGCTCCACTCCCAATTGGATTGCGGTCTTCATGGTTCACTTGGCCACCATCCCGATCACCGGCACCGGCATC  
AACCCCGCTAGGACCTCGGAGCCGCACCTATCTACAACAAGGCCAAAGCCTGGGATGACCA**GTAGTATATAT**  
**ACCTTTCTTCTTACTGTTGATATTTGTAGCATTTTATCATCCTTGTAATGCCATTGAATTACAATGTGTCTTAC**  
**ACTCTTTTTCACTTTGTTTTTTT**CAG**TGGCTCTTCTGGGTGGACCATTCAATTGGCGCAGCTATTGCAGCTTTCT**  
**ACCACCAATTCATCTTGAGAGCAGGTGCTGCAAAAGCTCTTGGGTCAATCAGGAGCAACCCCAATGTT**TGA**CTTT**  
GATAAGAAGAAGAAGAAGGCTTTCATAGTTTAAAGAAGAATATTAATGGGGGATTGGTTGTGCTAATGAGGATCAT  
TAAATTGTAGACGAAAGTCTCTTTGAGAAAAGGGAGCTTTTTCTGCCCTCTTTGTCTTCTAACCCCACTTGCC  
TTTCAATTTACTTCTATGTTGTCTTTTTTTTTTCCACTTGCTCTCTTTGGTCTCTCTTGTACTCTTGTGATTTTAA  
TTAACGTTTGTACTGAGGATCACTTTTTTGCTTTTTTTTTTGGTGTCTCAATTCAGTGAATTTGGTGCTAGGGGGGAG  
ACATGCCCCACTAGATCATACTAGGGAAATGACTTTTAAACACTAGGGATAGATGGGCCTGATTTTGCTATGTTTA  
ATCTTATGCTTTTGGTAGGTGAAATTTTCACTTCTACTATAAAATGAATCTTCCTTATTTTAAATACGGATCTGGCT  
TCTGTGCTGTAGTGAGAACTAAAGCACAGATGCTGTAAATATTGGACGGTTCAGATTTAATCAAATTTCTTTT  
AACTTAATGGTCTGTTTTTAACTCAAAGTCTTCTTCCAATAACACTTTCTCATCTCTTTCAATTTCTCTTTT

>**BpePIP2 ; 4**

**ATG**GCCAAGGACGCGGAGGTGCCAGAGCATGGCTCTTTTACGGCGAAGGACTACCACGACCCACCTCCGGCGCCG  
CTCTTTCGACGCCGTGGAGCTCACCAAGTGGTCCTTCTACAGGGCTTTGATAGCCGAGTTTATAGCCACTTTGCTC  
TTTCTATATATCACAGTGCTCACCGTGATAGGGTACAAGAGCCAAATTGACCCCGCAATGACGGCGAAGCCTGT  
GGTGGGGTCGGCGTTCTTGGTATCGCTTGGGCCTTCGGAGGCATGATCTTTGTTCTTGTTTACTGCACTGCTGGG  
ATTTACAGGGGGTCACATTAACCCGGCGGTGACGTTTCGGGCTGTTTTTGGCTCGAAAGGTGTCGCTGGTGCGGGCG  
GTGAGCTACATGGTGGCTCAGTGCCTGGGAGCCATCAGCGGTGTTGGGCTAGTGAAAGCCTTTAATAAGGCGCAC  
TACACTAGGTATGGTGGTGGTGCCAACACGCTGGCTGATGGGTACAGCACAGGCGTTGGATTGGGCGCGGAGATC  
ATCGGGACCTTCGTGCTTGTCTACACCGTGTTCTCTGCTACGGATCCCAAGAGGAATGCTAGAGATTCCCATGTT  
CCGGTTTTTGGCTCCACTCCCAATTGGATTGCGGTCTTCATGGTTCACTTGGCCACCATCCCGATCACCGGCACC  
GGCATCAACCCCGCTAGGAGCCTCGGAGCCGCACCTATCTACAACAAGGCCAAAGCCTGGGATGACCAATGGCTC  
TTCTGGGTGGACCATTCAATTGGCGCAGCTATTGCAGCTTTTACCACCAATTCATCTTGAGAGCAGGTGCTGCA  
AAAGCTCTTGGGTCAATCAGGAGCAACCCCAATGTT**TGA**

>**BpePIP2 ; 4**

MAKDAEVPFHGSFTAKDYHDPPLFDPAVELTKWSFYRALIAEFIAITLLFLYITVLTIVIGYKSQIDPANDGEAC  
GGVGVGLGIAWAFGGMIFVLVYCTAGISGGHINPAVTFGLFLARKVSLVRAVSVMVAQCLGAISGVGLVKAFNKAH  
YTRYGGGANTLADGYSTGVGLGAEIIGTFVLVYTVFSATDPKRNARDSHVPVLAPLPIGFAVFMVHLATIPITGT  
GINPARSLGAALIYNKAKAWDDQWLFVWGPFIGAAIAAFYHQFILRAGAAKALGSFRSNPNV\*

```
>FXXK01000553.1:54000-60000 Betula pendula genome assembly, contig:
Contig552, whole genome shotgun sequence
>Bpev01.c0552.g0003.m0001
Bpe_Chrl3 14,364,373-14,366,680 (-1) ::
complement(join(14364373..14364486,14364614..14364754,14365558..14365853,14
366371..14366680))
```

AATAAATACACAGCTTTGAATTTTATTATTATTGTGAGTCTTGATATTAAATATATATGTGTACGTGTTTTTATGTATGTATGATA  
 AATATATATGTGTGTGCGAGCATAATGAATTTTATATACATACACATAAACTTTGAGATTAAATTTATTTAAAAATTCATA  
 TTGATTTTATTTTATTTAACAATAATTAATTTAATAATTAGTATAGATTATATATAAAAAATAAACAACTCGTGATATTT  
 ACTCTATATAAAAGAAAATAATAAATTAATTTGAATAGCTTTGTATAAACCAAATTTTAAATTCATTCAAAAAATAATAAG  
 TTAAATTTTGAATAAAATAATCTAATTTCCGTAATAAACTTTAAACACAATTTTATATTTAAAAATAAAAAATAATAAATA  
 AAAATTTAAACATTTCAATACTCCACACAACCTTTTCTAATCAGTTGTCTACAACCCCTCTCAAAGGTCATGCCAAGTC  
 TAATTGGAAGAGAAAACTAGTGTCTGGAGGGCGAGCTTGCAGAGAGAATTACAGGGTCTTATTGTATGTTTTTATAG  
 GCCGTGTCTGTTGCGACGTCTGATCTTCTTCTTTTCCACCGAACTGATAACCTCATGCTGTAATCTAGTTACT  
 TTTTTTACACCAAGCTGGCCCTTTTTTAACTGTCTTTGAACTTGCATAAAATTTACAGAAAAACATGAGTTTTTGT  
 TTTTTTTAAATCTGCGCAGACAAATTGCAATAAAATCTCCACTACGTAGAATTTAATATGCTTTTTTTTTTTTTTAAATTC  
 AAAAAAGGAAAAAGATGACACAGAAAAAAATTTTACCACCTCTTTATCCAAAAAAGTCAAAAGATTCTA  
 AATAAAAAATAACAAAAATTAAGACTTTTCTGAAAAATATGCATTAAACTTTGAACAATATTATAAAAATAAAAATAAT  
 ATTGTAAAAACATTTGGGTGTGCTTTGAAAGAGAGCATAGTTAAGACTTTTCTTTTTTCCCCTTTAAACAAATACTTTT  
 AGGATAAAGGTTTTTTTTTTTTTTTTTCTACTCAATCTATTAAATTAATTTATATTTTCAAATATATGTGGAACCTCACA  
 TATTTTTATTAAAAATATATGTAAATTTTTTACATATATTTTTTAAACAATAGTAATTTTAATAGACTAAATTTAAAAA  
 AAAAAATTTCAACTCAATTTTACAGTTTACCCCCCTTGTCACGCATAATGAATGCCCTCTTGGTAGTTGTTCACGAATC  
 ACAATGCATCCTCTTAAGCAATCAATTATAACCAAAAAAAGGTTCCAACAAAGCTCGAAGACAGTGAAGA  
 AATAGACTGTTGCTTACTTGCCTGCTTAATCTCGATTAGATGACCGTTTCACTTTTAACTACAACACACACATA  
 TATATATATAGCCGTTAAATTTATGAAATTTTGGGCACCATACCGGGACCATCGAAGTAGCTGGAAGAAGAAAG  
 GAAAAAGAAAAAAGGGAGAAAGTAATCAAGAGCCGTTAGAGACGAGGTTGGGTCCATGCAAGCGAAATCAAGC  
 AAGATGGGCGGCAAAAACTATGTTAATCTTATCATTAGTGTCCATAAAATAAATAATTATTTATGGACTCTTAATTT  
 ATTGACCCTAATACTCTCTGCCCTCTCCCATAAATACCCCCCTGTACTCTCCTCTTAATCCACACACACACATACT  
 GCAGCATAACACAAAACTTCCCTACAGTGAGTATGCGGAAGGACGTTGAGGTTGCAGAGCACCAAGGAGAGTAC  
 TCGGCAAAAGACTACCATGACCCTCCTCCAGCACCTTTGATCGACTACGACGAGCTGATCAAGTGGTCTTTTTTAC  
 AGAGCTCTCATAGCAGAGTTCATCGCCACCCTTCTTTTTCTTTACATCACAGTCTTGACTGTGATTGGCTACAAG  
 AGCCAGACTGATCCCTCCAAGAACCCCGATCAATGTGGTGGGGTTGGCATTCTCGGCATCGCTTGGGCCCTTCGGC  
 GGCATGATCTTTCGTCTCTGTTTACTGCAACGCCGGTATCTCTGTATGATGGTAGCCAATTTATTTTACCTTTTTCTTT  
 TTCTTTTTTCCTTTTTTTTTTTTTCTTTTTTAACTTTCATATAGTCCCATAGTCTCCAAAAACATCGGTTCCCTTCTGCA  
 TGTTCCATAAATTTTTAAAAAATTTACTTTTGGTATTTTGTTTATAAATTAATTTATTTTTCGTAGATTCATGTTA  
 AATTTTTGTCTCAAAATTTTTAAAAATTTCTTATATTTTTTTTTTAAAAACAATTTATAAAATCTTTTTTGTCAAAATA  
 CTTTTCAAAATTCGAAGCAGATATTTTTTACAAATTTAGTTTAACTCTAAATCTTTTGGTTTTTTTATTTTCTAAAAAAT  
 TATAGGTATTTTTAAAAATTTTTTACATAAATTTAAACAATGAATCCGATCGATTAAAAGTTAAATGATAAAATATTCAGA  
 ATTCAAAAGAACAGAAAGTTAAAGAGAGCTATCTATTTTTTTTTTATTTTTTATTTTTTGGGTTATAACTA  
 AAAGAAATTTAAATGAAATATTTCTAATGTGGGCGAGGAGACACATTAACCCGGCAGTGACGTTCCGGCTGTTTTT  
 GGCGCGGAAGGTGTCGCTCATCAGGGCGTTGTTGTACATGGTAGCACAGTGTGTTGGGTGCAATCTGTGGTGTG  
 GCTGGTGAAGGCCCTTCCAGAAGTCTGACTACAACAGGTACGGAGGTGGGGCCAACGAGCTGAGTGTGGGTACAA  
 CAAGGGCGTCCGATTGGGGGGCCGAGATCATCGGTACCTTTGTCTCTGTCTACACTGTCTTCTCAGCCACTGATCC  
 TAAGAGGAGCGCAAGAGACTCCCATGTTCTGTAAAGCACCTGATCGCACCCCTGTCTCTTAAATGCAATTATATTCCG  
 TATATATGCTTTATTTATCGTCTCTTTTTTTTCTTTTTTTTTTTTTTAAAGTCTTTATTTATTTGTCTTGAATCTTGGTC  
 TTGCCCTACCTTAAAGTGAAGAGACATGCTGAATATGTGAGCTACTTTTATTAGCCTGTATGTATGTGCCATTG  
 AGTTCCCGATTAGACATCAGTACAGGCTGAAATACTGTAGCATCAGTTTGTAGTTCCGATTAGCATCAGTACAGGCTG  
 AATACTGTAGCATCAGTACAGGCTGAAATACTGTAGCATCAGTTTGTAGTTCTGATTAGCATCAGTACAGGCTGA  
 AATACTGTAGCATCAGTTTGTAGCTGATGTTTACAATTTACCCATGCCATTATATATTCTCTCAAGTGGTGGATTATT  
 TTCATTTTCATTTTTTTTTTTTTTTTGTCTTTACTTTTAAAGAAAAAGTGATTGAGCCATTTGTGCTTCATTACCTACCTT  
 TTTGATGGGTTCCGTTTAACTTTTTTGAAGAGTAGCTTGGATGGATGAATTTAACTACCTGATTGTACAAAAATAAT  
 CATTTTTTTTTTAAAGAAAAATTCAGCCTATTAAATTAATTTGGTAGGTAATGTTTTTGCATGAAATTATAATTTTGTATG  
 GAAGTAATTTTTTTTTTTTTTTTGTAGTAAGTAATTCATGTATATGTTATAAATGTTATCAAGCCCTAATTTTCTTTAAA  
 AATGAATCCACAACTTATACAAGTGTTGGATATATATATATGGTGATTTTTTGGTTGATTAAATTTGTTGTTAATTT  
 AAATGAAAGTTTTTGGCACCCTCCCTATCGGATTTGCTGTGTTTCATGGTTCACTTTGGCAACAATCCCAATCACT  
 GGAACCTGGTATCAACCCAGCAAGAAGTTTTTGGAGCAGCAGTGATCTACAACAAAGATAAGGCCTGGGATGACCAA  
 GTATATATCTCTTCTCCTTTCTTCAATATTTATTTATATATATATTTACTCTTTTCTTTTCTTTTCTTTTGTAAAT  
 AAATTAATTTAAGTACCTTTTCACTCTTATCATATATCTTTTATGGCATCTGTGCAATGGATATTTCTGGGTGACCTTT  
 TATTGGAGCTGCCATTGTCTGCCTTCTACCACCAATTCATCTTAAGAGCAGGAGCCATTAAAGCTCTAGGATCTTTT

CAGAAGCAATGCTTAAAAGAGCTTTTCCCCCA**TAA**ATTTCCAAAGAATAACAATATTGCGGAGTAAATTAATGG  
GAGGGGCCATGGAATTGTAGATAAACATGCCTATGTGGCAGGGGTGTATTTTGTATCCTGTCTTGTCCCTTTTTT  
TTTTGTTGGCTTTGCATGTATTTATTTGGTCATTGTCTGACTTTTGCATTTTTTACTTCTTTCTTTGTGGTGTATC  
CGTATTGTTTTCCACATATATATGAACTAGTAAAATGGACTGTGTTTCATCTTATTTGCAAATACTAGCTAATTAA  
TTTAATTTTCGCTGAATTTTTCTTCTAATTTTCAATGACGGGCCTGAGAAAAATGACTCAGACTTGAGAATGCAGC  
ATTAGTCATAGAACTTGAGTTCAAGCCAACCAGAGATTAGGTTACAGAATATTCTTACAGAAGAAATTAACCACC  
TGATGGAAAAAAAAGGGGTTTGTCTAGAACACCTTCTAGAGGTCCTTCTAGGGTCTTCTGAATTTTTTTGATTTT  
TTTAATCAAATTGGGCCACCATTTCATTGAGAGGTGGGCCCAATTTGATTAAAAAAATCAAAAAAATCTAGAA  
GGACCCCTAGAAGGACCTTTAGAAGGTGCACAAGCATTTTCCAAAAAAAAGGGTAACGAAAAAAGAGAAGAA  
AGGAACAACTTTTCATATATAAAGTCAAAAAGAAAGCTCAAATTTGTATTTTTTGCTTTTACAAAAGAAAAAGTTG  
TAAACAAATATTCTCTCTCTCTAACCATCCTTATCATCTCTCAATCTGTACAATTATTTAAGGTGAGCTTTAATA  
AAGAGGGCTAGCATCAAATTTAATATTAGT

**>BpePIP2;5**

**ATG**GCGAAGGACGTTGAGGTTGCAGAGCACCAAGGAGAGTACTCGGCAAAAGACTACCATGACCCCTCCTCCAGCA  
CCTTTGATCGACTACGACGAGCTGATCAAGTGGTCTTTTTTACAGAGCTCTCATAGCAGAGTTCATCGCCACCCTT  
CTTTTCCTTTACATCACAGTCTTGACTGTGATTGGCTACAAGAGCCAGACTGATCCCTCCAAGAACCCCGATCAA  
TGTGGTGGGGTTGGCATTCTCGGCATCGCTTGGGCCTTCGGCGGCATGATCTTCGTCTCGTTTACTGCACCGCC  
GGTATCTCTGGAGGACACATTAACCCGGCAGTGACGTTCCGGGCTGTTTTTGGCGCGGAAGGTGTCGCTCATCAGG  
GCGTTGTTGTACATGGTAGCACAGTGTTTGGGTGCAATCTGTGGTGTGGGCTGGTGAAGGCCTTCCAGAAGTCT  
GACTACAACAGGTACGGAGGTGGGGCCAACGAGCTGAGTGTGGGTACAACAAGGCGTCGGATTGGGGGCCGAG  
ATCATCGGTACCTTTGTTCTTGTCTACACTGTCTTCTCAGCCACTGATCCTAAGAGGAGCGCAAGAGACTCCCAT  
GTTCTGTTTTGGCACCCTCCCTATCGGATTTGCTGTGTTTCATGGTTCACCTTGGCAACAATCCCAATCACTGGA  
ACTGGTATCAACCCAGCAAGAAGTTTTGGAGCAGCAGTGATCTACAACAAAGATAAGGCCTGGGATGACCAATGG  
ATATTCTGGGTTGGACCTTTTATTGGAGCTGCCATTGCTGCCTTCTACCACCAATTCATCCTAAGAGCAGGAGCC  
ATTAAAGCTCTAGGATCTTTTCAAGCAATGCTTAAAAGAGCTTTTCCCCCA**TAA**

**>BpePIP2;5**

MAKDVEVAEHQGEYSAKDYHDPAPPLIDYDELIKWSFYRALIAEFIATLLFLYIITVLTVIGYKSQTDPSKNPDQ  
CGGVGILGIAWAFGGMIFVLVYCTAGISGGHINPAVTFGLFLARKVSLIRALLYMVAQCLGAICGVGLVKAFQKS  
DYNRYGGGANELSVGYNKGVLGAELIGTFVLVYTVFSATDPKRSARDSHVPVLAPLPIGFAVFMVHLATIPITG  
TGINPARSFGAAVIYNKDKAWDDQWIFWVGPFIGAAIAAFYHQFILRAGAIKALGSFRSNA\*

## **BpePIP2;6**

**>FXXK01000484.1:42681-48008** *Betula pendula* genome assembly, contig:  
Contig483, whole genome shotgun sequence

**>Bpev01.c0483.g0002.m0001**

ChrBpe\_Chr8 4,856,8604,858,776(1)::

complement(join(4856860..4856979,4857091..4857231,4857470..4857764,4858471.  
.4858611,4858613..4858776))

**>BpePIP2;6**

GTTTACTTAAATTAATGTGATTTTTTAAATATCTTAATATCAAAATTTAATAATAATATATTATAAAATTTAAT  
GATTATTTTAAAGTCACATTAATTTAAGTGTACACAAAAAACATATAAATGACATGTATCTTTACTCATTTTT  
TCAATTTTTTTTTTGGTACTTTGCAAATAAGGATAATTATAGTACTTCTTCTAATTTAATCCTCCTTAAATTATG  
TGTATTGCAAACGTGACTCTTACATTGCGCTAATGATAAAGAGCAGTTCAGGCTAATTTAACAGTGAATCAGTCT  
GGGCATGTGAACGTAACTTTAGTGGGTCTCATGATTAAAAAAATTTATTTTTTATTTATTTTTTTATCTGATTTA  
GCCCAAATTAACACTATTTATTTTACAGCTAAACTGATGTGAATCAGTGCTCCTTACATTAACATCTATAAAAG  
TGAATACCCCTTGCTCCACTAATTGTAGTTTTGTGTAGCGTGTACGGTGTACGTGCAGAATATCTCTTTCTTTTTT  
TTTTCTTTTTTTTTCTGAGATGCAGAATATCTCTCTCGATGCTGATGGCGCATTACTTAACAAGTCTCATGAATGT  
TAAAACAACATTTTATTCAAAGACGTATTCATTTTTGCCTTTTCAATTATCCCTTACCTTAAAAGGAAAGCATG  
AAAAGCCCCTGCCCCTGAGTTATTAATGACGTACAAAACCTTCTGGGAATGAAAAGCAAAAAACAGAAAAGTAATA  
GTCAAAAATTAAGGTAAGGCCAGCCAAAAAATTTGTAAGAACTACAATAAAAAAACAGAAAATTAAGGAGCG  
CCACTAAGTCGTTTTTTTTTAAAAAAAATTATTTACCACAACCAATGCTAATGAATTGATATCTACTGAGTTA  
CAATAAATATTTTTCTCTCAAAGATATAATGGAATCCAAAAATCTTACCTGATTTAGTTGTATTTAGCACAAAAC  
AAAACAAAAACATTTTCAAATTTCTATTCTAACAAACAAGAGAGACTCGAATTTTTGGAAATTACATAATATTA  
TGAAAGATTAAAGAATAGGAAATTATGTGTTCTTGAGACTTCGTACCATATTAGAGTATATACACAAGTGAATAA  
GCATTGCTTGCTTTCAAACAATAACTTAGTGTGATTGAGCTATAAATATAAAAGTAATGCTACATGTTGAATTT  
TTTTTCTAATTTCTATTTAATATGATATATATGCTTTTTTTTTTTTTTTTTTTTAAATGAGTTTACTTTTATATTTT  
AAGGTTTCATCTTTATTTATATATACAAAATTAATAAAATTAACATATAAAAATTACTCTAAATACAACTTGAT  
TTTCTCTTTTTCCCATATAGAATCTATTCTGCCAAGATAATATTGAATTTAAAAACATTTTCCAACCTACCTACTC  
TAAAAACGTTTTTCCAAGATAATATTTGTCCACATTATCAAAATATTAGTGAAATTTCAACTTCCAGAACCTACT  
CGAGTATTTAGCGGAGGGCGAATCAAAAGGTGCCAGAGAAGCAGAGACATTTACCAATGGTGGGGTCACAGAAA

GTGAAAGAACTAAAAATTGGAGATGGGGCGGCAAAGCTAAGCTTATTAATTAACGGACAAAGCTTACTCAACTG  
GAAACACCCATATATATATACCCCATCTCCTCTGTTTCTTCCACACCAATACAGAATTTCTCACCAAACCCTCA  
CTCATCTCTCTCCTCTCTCCCTCTCATTCACCCTAGTTTGC GCGAGTGCT**ATG**GCGAAGGACATGGAAGTTGGAG  
GGCAAAGTGGGTCTCCGCCAAGGACTACCACGACCCACCACCGGCGCCGCTGATTGATGCAGAGGAGCTCACAA  
AGTGGTCCTTCTACAGGGCTATCATTGCCGAGTTCATTGCCACGCTCTTGTTCCTATACATTACTGTCTTGACGG  
TAATTGGATACAGAGCCCAGTCCGACACAACCAGGGGCGGTGACGACTGTGGTGGCGTTGGCATTCTTGGCATAG  
CCTTGGCCTTCGGTGGCATGATCTTCGTCTTGTCTTACTGCACAGCTGGTATTTCAG**GTTGGTCCTCTGTGCGCAT**  
**ACACA**ACTTCAACTTCTTTTTTCATTTAAAAATTCGAAAAACTTTACCAAATCTCTTTCAAGTCTCTTCAAATGACC  
TCAATAGTTAGAAGAAATCTTAATTAATGTATCAATTTTTCTTTTTTTTTTATATTTACTGTTAAAAATTTTCTT  
TAAATTCAATAAAACAATATGTATAATAAAGATTCAAATTTTGGGTAATATTACAAGTTCAGTTAAATAGTGACC  
AATACTTAAATTTTTTACAATTTTTTTTTTTTTAAAAAAAAGTATTTTTAAATTTTTTGACACTTCTCCATTAAAAAT  
TAACAACAAATCTTAATAGATAAAAATTAATAAATAAATAATATAATTAATAAGAGGTTTTAAACTTTG  
AATTACTATTTTTAAACGCGTAAAAATTAATAAAGAAAAATTTAAATTCGTTTACTAATTGGATAGAAAGTGTGG  
GCGGCAATTCATGTCTTATTCTATTACCTTTCTATCATAATATAATATAATAGTTGTGTTGATTGTATCGAGTT  
CGTGTGTGGGTGCGAAAATTACGCTAGGATAAGTCTTCTATAAACATCAAAATATTTTGTACAAGTTATGTGGGAA  
CTTCCAATTTTCTATAATAAAACAAAGAAAGAAAGAGCGATGTAGATTTGTAGCATATGGCTAATAAATGGTAC  
CAA**ACTGTG**CAGGAGGGCACATTAACCCGGCGGTGACATTCGGGCTGTTTCTGGCTAGGAAGGTCTCGCTGGTG  
GAGCCATTTTGTACATGGTAGCTCAGTGCTTGGGGGCCATATGCGGATGTGGGCTGGTGAAGGCATTCCAGAGAG  
CTACTACACAGGTACGGTGGTGGCGCCACAGGCTCTCCGTTGGATACAGCAAGGGCACTGGCTTGGCCGCCG  
AGATCATTTGGTACCTTTTGTGCTTGTCTACACAGCTCTTCCGCCACTGATCCCAAGAGAAGCGCAAGGGATTCTC  
ACGTTCCCGTAAGTACCCATTTTTTTGAATTTAACTTAAAAAGGGAATAATTCATAAAATTTCCCGAATTTTAAC  
ATATTTATCTTTAATTTTTTATTTTTTATTTTTTCAATTTTCATCGATCTGTGCAGATTTTTTCGTTAAATCCTATTA  
AAATTATCAAAACACCAATTTTTTTGAATATGTGAATAAGTCACTTAAACAAATCAATCAGTTTTAGGCTTTAATT  
TAATTTTAATTAATCTTGTAGGATTGGCACCACCTTCCAATTGGATTTGCGGTGTTTCATGGTTCACCTGGCCACC  
ATTCCAATCACCGGAACCGGTATTAATCCTGCCCGGAGCTTCGGAGCTGCAGTGATGTACGGCAAGACCAAGGCA  
TGGGATGACCAAGTATGCACCTACCCATCTCTTTTTGGTTCTCTTTTCTCTCTGATTTATGTTACAACCTTATACA  
GTA**ACTGGT**GCTAACTTAAAAATTTGATTTGATTTATGAAAATTTCA**G**TGGATTTTTCTGGGTGCGACCATTTAT  
GGCGCTGCTATTGCTGCATTCTATCACCAGTTCATTTTGAGAGCAGGCGCTGCAAAAGCTCTAGGGTCCCTCAGG  
AGCTCATCCAACATA**TAA**ACTGAGCCAAAGATATTGTGGGACTCTGCTTGCCAATTGCTTCAAAGAGCAATGGGG  
GTGTGCAACAGTACTGGAATTTGTACATTGTAAAGTTTCTGCCGAGGATGTCCTTCGTCGTACTTTTGTTCATGTT  
CTGGCAGTCACTCATTTTAAATGTGCGCTAATGTTGTGTTGTCTCCTCTTTTCTTTGCAATTTCTGGTCTTTTGC  
TTTTGCTCTGTGTACTCATGTGTTATGGTCGAAATGATCAGCATGTACGCTTTGTTTGTCTCTCTATCAAT  
CTTACGACTTTTATTTTAGCAAAGAAGTATAGAGGGGTCCATCAATAAGTACAGGGTGATGCGCAAACTAACATCT  
ACTTCATAGTCTAAGGAATAATATGCGTAAAGTAATCACAAACAGCTTTTTTTATAAATTCATTCTCTAAATTAAG  
GAAAACAATAAAAAAAAAAAAAAAAAAGACTTACATCAGCTTTGTTATTAATTTCTTAAACTTTGAGTTTGTACAAAT  
CAATAGTTTTTAATCCAAAATTATCCATCTCTTCTTTTCTTTTGTCTTTTATTGGGAATTGTATTAATATTTATT  
AAAAAAGTGAGGTAAGTAAAGAATTTATATTTTGTAAAAAATAATATTTTAATGGTGTAAGAAAAAAAAATATT  
ATGAAGTTGGTTTGAATTGAAAATAAAAGTAATTTTAATTCATAAATTAAAGAAAAATAAAATAAAAAAGCTTCT  
GAATGTGAATGCTCTCATACATAGCAAAGTTTCTTCATATATAATGTGGGCGGGCAATTTGAATTGTTGGGTAA  
TTACACTCAACCTCGTTGGTAAAGAAGTCTTTTTGTAGCCGAACCTATTAAAAATAGATGGAATCTCGATCATG  
TGCAATACACGAGCATTTTTTCTTTTAGATTTAATATGTCTCTTTTGCCCTTGTTATGTATGTTGTAATTCCTACA  
TTTAGCATGGGCTTCCAAGGAATATCAAATAAACAACCTCCAAGTGTATATTCTGATACATCACATTAACAAAAACA  
TTTTATGGCTTCGCCAATTTTAGTT

**>BpePIP2 ; 6**

**ATG**GCGAAGGACATGGAAGTTGGAGGGCAAAGTGGGTCTCTCCGCCAAGGACTACCACGACCCACCACCGGCGCCG  
CTGATTGATGCAGAGGAGCTCACAAAGTGGTCCTTCTACAGGGCTATCATTGCCGAGTTCATTGCCACGCTCTTG  
TTCCTATACATTACTGTCTTGACGGTAATTGGATACAGAGCCCAGTCCGACACAACCAGGGGCGGTGACGACTGT  
GGTGGCGTTGGCATTCTTGGCATAGCCTTGGCCTTCGGTGGCATGATCTTCGTCCTTGTCTTACTGCACAGCTGGT  
ATTTTCAGGAGGGCACATTAACCCGGCGGTGACATTCGGGCTGTTTCTGGCTAGGAAGGTCTCGCTGGTGGAGCC  
ATTTTGTACATGGTAGCTCAGTGCTTGGGGGCCATATGCGGATGTGGGCTGGTGAAGGCATTCCAGAGAGCTCAC  
TACACCAGGTACGGTGGTGGCGCCAACGAGCTCTCCGTTGGATACAGCAAGGGCACTGGCTTGGCCGCCGAGATC  
ATTGGTACCTTTGTGCTTGTCTACACAGTCTTCTCCGCCACTGATCCCAAGAGAAGCGCAAGGGATTCTCACGTT  
CCCGTATTGGCACCACCTTCCAATTGGATTTGCGGTGTTTCATGGTTCACCTGGCCACCATTCCAATCACCGGAACC  
GGTATTAATCCTGCCCGGAGCTTCGGAGCTGCAGTGATGTACGGCAAGACCAAGGCATGGGATGACCAATGGATT  
TTCTGGGTGCGACCATTTATTGGCGCTGCTATTGCTGCATTCTATCACCAGTTCATTTGAGAGCAGGCGCTGCA  
AAAGCTCTAGGTCCTTCAGGAGCTCATCCAACATA**TAA**

**>BpePIP2 ; 6**

MAKDMEVGGQSGFSAKDYHDPPLIDAEELTKWSFYRAIIAEFIATLLFLYITVLTIVIGYRAQSDTTRGGDDC  
GGVGILGIALAFGGMIFVLVYCTAGISGGHINPAVTFGLFLARKVSLVRAILYMVAQCLGAICGGLVKAFQRAH  
YTRYGGGANELSVGYSKGTGLAAEIIIGTFVLVYTVFSATDPKRSARDSHVPVLAPLPIGFAVFMVHLATIPITGT  
GINPARSFGAAMVYGKTKAWDDQWIFWVGPFIGAIIAFYHQFILRAGAAKALGSFRSSSNI\*



## TIP – Tonoplasmic Intrinsic Protein

### **BpeTIP1;1**

>FXXK01000279.1:16272-18583 Betula pendula genome assembly, contig:  
Contig278, whole genome shotgun sequence

>Bpev01.c0278.g0002.m0001

Chr Bpe\_Ch8 6,808,526-6,809,382 (1)

::join(6808526..6808909,6809008..6809382)

### **>BpeTIP1;1**

CCACCGTCCTTGAGATCTTCGGGGCCACTTGATTTATTTATGGGTGGCCAATAACTATTGCCATGTGTTCATGTCA  
GCATCAAGCAGCAGACAAAGATCCAATGCATCGCAAATTCACCTCCCTGCTTATCCCCATACCTCATTCTTTTTCAT  
ATATAATAATATTTTCATGTCTCAATACGCTATATATAAATTCGAAGATTATTTTCGAAATTAGTTTTTTTAAATTTAC  
CCTATAACAGTTTTTTTTTTTTTAAATTCATATCTGAAAAACAGGAACAAAGGAGATTATATAAGAGCATCTTTGTCTC  
ACTCTTTAAGCGATTTTATACAAGAACAGTAATACAAGTCAATTCACCTAAGATTTTTTAAATCAATATGTGCAA  
AATCTTACATGACGGCCACTGATGACATCATATTTTTAAACGATAAATTATAATTTGTAAACGTATAACTAAA  
TTTTTTTATACCGTAAATTTAAATATTTTCAAAACCGAAAAATCAAAAAATACATTAATATACAAAAGTTATTCGA  
TCTTTTCGAGAGGCCAAGCAAATCAGACAAAAAAAACACCACTATACAGCACGTTACGTGGCTCTTATCCTTGCAG  
CACACGTGGCGATATTTTCAGCAGTGTAAATACCCAGTTGCTTTGCTGTACGAACAGGAATGGCTGGTAGATGGTCT  
CCCCCAAAATTTGAAAAAAAACCAAAAACAAGATCACTATTCAAGTATTCACAGCCTGTCCACCAAGCACGTTCT  
AAAATTATTATTACTTGTACCGGAAACCGGCTCCAGCCGGTATATTAGCGCTCGTTCACGTTCAATATAAAACCCA  
CATGCTGAGAAGCGGAGAGCAGTACCAACAACCAAGGCTAAAACGCAGTAGTGAGTGTACGTAGCTACAACAACCT  
CATCAAACGACC**ATG**CCGTTTCAGGAATATTGCCGTCGGGAGGCCGGAGGAGGCCCGCCACCCGGATACACTGAGG  
TCGGCGTTGGCGGAGTTTCATTTTCGACGCTCATTTTCGTGTTTGCCGGGGAGGGCTCCGGCATGGCCTTCAACAAA  
CTCACCACAAACGGCTCCACCACCCCGTCTGGGCTCGTGCAGGCTGCCCTGGCCCACGCTTTCGGTCTTTTCGTC  
GCCGTCTCCATCTCCGCCAACATCTCCGGCGGCCACGTCAACCCAGCTGTACCTTCGGCGCCTTCATTGGTGGT  
AACATCACCTCTCTCCGGCGCATCGTCTACTGGATCGCCAGCTCCTCGGATCCACCGTCGCTTGCTTGCTTCTT  
AAGTTCGCCACTAACGGCTTG**GTGAGGCTACCCGTTTTCTGTTAGTTTGTTACAGTTAGTCTGACACTTAATTTT**  
**GTACATTTAATTATTTAATTAAATTTAAATTTGTACTTTCTCAG**ACCACAGTGCTTCTCTCTGTCGTCGGGAG  
TAGGAGTGTGGAACGCCTTCGTTTTGGAGATCGTGATGACTTTTCGGTTTAGTCTACACAGTCTACGCGACGGCCG  
TTGATCCAAAGAGGGGCGAGTGTGGGAGTTATAGCCCTATCGCCATCGGTTTCATCGTGGGCGCTAATATTTTGG  
CGGGTGGGGCGTTTCGACGGGGCTTCGATGAACCCGGCGGTGTCTGTTTGGACCCGCCCTGGTGAGCTGGACATGGG  
AGAACCCTGGGTCTACTGGGCCGGGCTCTGATCGGAGGCGGGCTCGCGGGTCTTGTTGTACGAGTTCTTCTTCA  
TCAGCCACAATACTCACGAGCAGCTGCCCCACACAGACTAC**TGA**TGAGCAAGGGAATCTGAAAAAGAACAGTGGTG  
GCACGGCTTTTCTCTGCTGTATTTACTTGTTTATTCGAGGGTTGTTCTTGTTGTTTTTTTTTAAATTAATTTGGTC  
ACCGTTGATCTTTAATTATCACCATCATGATCATCTAGCCACTGTTGTTTCTCATCACTGAATGTTATGATTGTA  
ATTCTCAAGTTGGGGTGTTGTTGTTTATCTGCTCTGCGTCCGTTGTTTGTGATTATTTTTTTTAAAAAAAATTC  
TGTTCTTTTCTCCTTCTTATTAACCTCAATTTCAACGTCCTTTTTTTTTTTTGGATTTTTCCCTGTTCCGTATTT  
CAATTATTGAATTTTCTTTGTCCGGTACCGGAAGCATCTAGCACGCCGTACGGTTGAGCTGTAAATAGAATCACG  
TACATGCATGTCCATAGAAATTACTGTAGGTGACCGTCTGGTTAATGAATCTGATCACCTGCCTCATCGGGGGC  
TGTGAAATGGAGTGTAACCATTTTCATGATCAAATTGGTGTGTTTAACTTAGTAAGTTATG

### **>BpeTIP1;1**

**ATG**CCGTTTCAGGAATATTGCCGTCGGGAGGCCGGAGGAGGCCCGCCACCCGGATACACTGAGGTCGGCGTTGGCG  
GAGTTTCATTTTCGACGCTCATTTTTCGTGTTTGCCGGGGAGGGCTCCGGCATGGCCTTCAACAAACTCACCGACAAC  
GGCTCCACCACCCCGTCTGGGCTCGTGCAGGCTGCCCTGGCCACGCTTTCGGTCTTTTTCGTCGCCGCTCTCCATC  
TCCGCCAACATCTCCGGCGGCCACGTCAACCCAGCTGTACCTTCGGCGCCTTCATTGGTGGTAACATCACCTTC  
CTCCGCGGCATCGTCTACTGGATCGCCAGCTCCTCGGATCCACCGTCGCTTGCTTGCTTCTTAAGTTCGCCACT  
AACGGCTTTGACCACAGTGCTTTCTCTCTGTCGTCGGGAGTAGGAGTGTGGAACGCCTTCGTTTGGAGATCGTG  
ATGACTTTTCGGTTTAGTCTACACAGTCTACGCGACGCCGTTGATCCAAAGAGGGGAGTGTGGGAGTTATAGCC  
CCTATCGCCATCGGTTTCATCGTGGGCGCTAATATTTTGGCGGGTGGGGCGTTTCGACGGGGCTTCGATGAACCCG  
GCGGTGTCTGTTTGGACCCGCCCTGGTGAGCTGGACATGGGAGAACCCTGGGTCTACTGGGCCGGGCTCTGATC  
GGAGGCGGGCTCGCGGGTCTTGTTGTACGAGTTCTTCTTCATCAGCCACAATACTCACGAGCAGCTGCCACCACA  
GACTACT**TGA**

### **>BpeTIP1;1**

MPFRNIAVGRPEEARHPDTLRSALAEFISTLIFVFAGEGSGMAFNKLTNDNGSTTPSGLVQAALAHAFGLFVAVSI  
SANISGGHVNPAVTFGAFIGNITLLRGIVYWIAQLLGSTVACLLLLKFATNGLTTSFAFSLSSGVGVWNAFVLEIV  
MTFGLVYTVYATAVDPKRGSVGVIAPIAIGFIVGANILAGGAFDGAASNPAVSFGPALVSWTWENHWVYWAGPLI  
GGGLAGLVYEFFFI SHNTHEQLPTTDY\*

## BpeTIP1;2

>FXXK01000397.1:206000-211000 *Betula pendula* genome assembly, contig:

Contig396, whole genome shotgun sequence

>Bpev01.c0396.g0015.m0001

Chr Bpe\_Chrl3 17,015,493-17,016,481 (1) ::

join(17015493..17015625,17015770..17016020,17016107..17016481)

## >BpeTIP1;2

AAGGTCGTATATAGAGAAATGGAAATAATATAGTTCTATAGAGAAAAACAAACAAAACGGGAGTCCCCCTTTTAT  
CTGTTGTCCTTTGATTTTTATAGGCAACTTGTGTTGGCCATGTGGCACGCCCCGATTGGAGGATTCTTTGTCGT  
AGTATTCTCTAGGCCTTATGATCCCCGCTTATCATAAAATTTGTAAGTGGGATGCGGGAATCAATGTTGACAACTT  
AAGGGATGAGTTTTAGTGCAGTGTGTTGGTGCACCTCAAGTTCATTGGGTGATGGGCAAGCATTCGGGTTGGCATG  
CCTCATAGGGTTGCTAGGCCCAACAAAAGGTTTTTTTTCTTTAAAGGGTTGGAGAAGAAAATCAATTGTGGCTAG  
CACCAACTTGCAGAGGATTGCTCAGGAAAAGCTTAAACGGCGAAAACCGCATGTGCTTCTTCAAAATCAGTTGAA  
TTATAGCTTAACACCCACCTTACCAGAACATCAATGAGACATAAAGATTCCCTATATTTGAGAGTCAAACCCATAT  
CATTGCATTATCCAAACCTAATGAGAATGCCCTGAGACCATCGAACCACCACCTTGCCCCAACAAAAGGTATTTGT  
AAGGACTTCCAAGTTGCAATCCAATCACATGAACTGTGTTTCAAGTGGCTGAAATCAAGTGGTTAAAAATTAAAGC  
AAAACATCTATTCCCTGTATGGGCACACAGCTCCATATAACAATATCATAGGACCGAATACACCACATCATCCCC  
TGCGTCTCTTCATGCACTAAACAAAATTAAGGATAATTAAGTGATGATCACTGTTTCATGATAATGAAGCCACCTC  
AATAACACCGGAGGTCTACATCAGAGCCGCATAAAACAATCCAATTGGTTCGGTCAAGCCAAGCCGCAGCAAAACAAT  
CATTGGTGGACCCACCACCACCGCCACAACCATTTTGGTTCGGTGATTAGAATTTCTTAACATATGCGATCATCCGTC  
CACGTGGCAAGCTGAGAACAAAACGGAGGCCTGGCCTAAAACCTTTTCAAGTGACAAGGAAAACGAGCCCTTATTTT  
TCTCATTCAAAACAAACTGTACCGGTTAGAAAACCGGCTATTCCGGTTGTCCAAACGACAGTTAAACCTTAGCCCTT  
TCCTGTATATAAACTACCTCCATGTAAAGCTAGAAAACCAAGGCAAGAAGCAACAAAAAGCTAGTGCAATTTGGAT  
TTCGAGTCTAAATTGAGATTTTGTAGAAAAATGCGGATTAACCAAATTTGCCGTTGGACACCCGGCCGAGTTTGGCGA  
TTCCGGTGCTCTCAAAGCGGCCCTGGCTGAGTTTCATCTCAGTGCTCATTTTTGTGTTTGGCGGTGAAGGCTCTGG  
GGTGGCTTTTCAAGTAAAGGCCCTGACTGACCCCTTTTGTTCCTTCAACTTCTTTGGAGCCTAAGTCATAGTTTGTTC  
TTTCTTTTTTGTGTTTATAATTAAGATAACTGAGAACTAAACTGATAATTGAAATGTTGAATCGATGAATGTTTT  
GGCAGACAAGCTGACAGATAATGGCTCGACAACACCGGCCCGGCTTGTAGCCGCAGCCTTGGCTCATGGCTTTGG  
ACTGTTTCGTGGCAGTGTCAATTGGTGCAACATTTCCGGCGGGCACGTGAATCCTGCTGTTACATTCGGCGCCCTT  
CCTTGGCGGGCACATTTCACTCATTAGGGGTCTTTTGTACTGGGTGCGCCAGCTTCTTGGATCTGTGGTTGCTTG  
CTTGCTTCTTAAGTTTTCTACCGGTGGACTGTAAAGCCCTTCACAGATATATATAGATGTACTTTCAATATATTT  
TGTAGATTTAGATTTGTGTTTAAATCAATTATTTGATGTCAGGAAACACCCGCGTCTCTTATCTTCTGATGTG  
AGTGTATGGAATGCGGTAGTGCTTGAGATTGTGATGACATTTGGGTTGGTCTACACCGTGTACGCCACAGCCGTG  
GACCCTAAGAAGGGAAACATAGGGATACTTGCACCCATTGCAATTGGTTTGTATTGTGGGCGCCAACATTTTAGCC  
GGTGGTGCCTTTGACGGTGCATCCATGAACCCAGCAGTCTCCTTCGGCCCTGCTGTCGTCAGTTGGTCATGGGAC  
AACCCTGAGGTCTACTGGGTAGGCCCACTCATTGGTTCCGCCATCGCCGCATAGTCTACGAGCTCATCTTCATC  
AGCCCAACACCCATGAACCGCTCCCAGCCACAGATTTCTAAAGCAATAAAGACCTCTTCTCTGTTCTCGGTTAT  
GGAAATGGGTTTCTTTTGGTTTTCAGCTATGGGTGTTTTGGTGTGTTTGTACCCCTTTTGTCTTTTCTTTT  
GTTTTTTTTTTTTTTTTTTTTTCTATTCAATACAAGGGGAAGGGAAAAGGAAAATTAGGTCTTTACCACCTCTGTAC  
CCTTCTATTGTTAATTGTTGATTCTTGTGTAACCTGTCTTGTATTCTCTGCAACTCATTTTGTATCAGTAATGTCCAT  
CTGTGCTCAGTTTAAAGATTTTCTCTTTTGTCCCTTTTGTAGTTTTTGAAGTTTGTAGGTGTAAAGGGGTACCCC  
GTGCCACCATGACTTGAAAAAAAATTAATTAATTTAAAAAATTAATTAATTTAAAAAATAAAAAAATAAAAAA  
AAGGTTGGTGGGTTTTAGTAGTTTGGATCACTAATAAAATTGCCATGTTAGCAGCATATTCCTTAGGTGCCATTC  
TGCCCTATAAACCATAATGTAATATATCAATAAGAAGAAGATTTGAATAGAAACAAAAAATAATAATAATTTT  
TAAATTTCTCGCCAGCACTCTTAACACCCCAACAATGCCAGCCCACTGATTTGGCTTCCAGCCACGACACGA  
GCACTCTTTAGAGTCAATGC

## >BpeTIP1;2

ATGCGGATTAACCAAATTTGCCGTTGGACACCCGGCCGAGTTTGGCGATTCCGGTGCTCTCAAAGCGGCCCTGGCT  
GAGTTCATCTCAGTGCTCATTTTTGTGTTTGGCGGTGAAGGCTCTGGGGTGGCTTTCAACAAGCTGACAGATAAT  
GGCTCGACAACACCGGCCCGGCTTGTAGCCGCAGCCTTGGCTCATGGCTTTGGACTGTTGCTGGCAGTGTCAATT  
GGTGCAACATTTCCGGCGGGCACGTGAATCCTGCTGTTACATTCGGCGCCTTCCTTGGCGGGCACATTTCACTC  
ATTAGGGGTCTTTTGTACTGGGTGCGCCAGCTTCTTGGATCTGTGGTTGCTTGTCTTCTTAAAGTTTTCTACC  
GGTGGACTGGAACACCCGCGTCTCTTTATCTTCTGATGTGAGTGTATGGAATGCGGTAGTGCTTGGAGTTGTG  
ATGACATTTGGGTTGGTCTACACCGTGTACGCCACAGCCGTGGACCCCTAAGAAGGGAAACATAGGGATACTTGCA  
CCCATTGCAATTGGTTTGTATTGTGGGCGCCAACATTTTAGCCGGTGGTGCCTTTGACGGTGCATCCATGAACCCA  
GCAGTCTCCTTCGGCCCTGCTGTGTCGTCAGTTGGTCATGGGACAACCACTGGGTCTACTGGGTAGGCCCACTCAT  
GTTCCGCCCATCGCCGCATAGTCTACGAGCTCATCTTCATCAGCCCAACACCCATGAACCGCTCCCAGCCACA  
GATTTCTAAAGCAATAAAGACCTCTTCTCTGTTCTCGGTTAT

## >BpeTIP1;2

MPINQIAVGHPAEFGDSGALKAAAEFISVLI FVFAGEGSGVAFNKLTDNGSTTPAGLVAAALAHGFLFVAVSI  
GANISGGHVNPAVTFGAFLGGHISLIRGLLYWVAQLLGSVVACLLKLFSTGGLETPAFSLSSDVS VWNNAVVL EIV

MTFGLVYTVYATAVDPKKGNIGILAPIAIGLIVGANILAGGAFDGLSMNPVSVFPAVVSWSDNHWVYVWGPLI  
GSAIAAIVYELIFISPNTHEPLPATDF\*

### **BpeTIP1;3**

>**FXXK01002331.1**:93891-100322 *Betula pendula* genome assembly, contig:  
Contig2330, whole genome shotgun sequence

>**Bpev01.c2330.g0012.m0001**

Chr *Bpe*\_Chr5 3,465,120-3,466,550 (-1) ::

complement(join(3465120..3465494,3465873..3466123,3466418..3466550))

### **>BpeTIP1;3**

TCTTGTTAAAAGAGAGTCTAATCCTAGAACCCACATAATATTTAGGATAAGCTGCTTGGTAGTAGTAATCTTATT  
CATCATCTGAAAAAAATCTTGACTAATGCCACTTGCTCATTCTTTTTTTTTTTTATTCTTTTTTTGTAGTACAA  
GAAAAAATATTGGTGCAATTGCAAACAGTATTCAAACCTTCATCTTAGAGCATCCACATTAAATCTTCAAATTT  
TAAAGAACAACCCTAAATTTTCTATTTTAAAGAACCAGTGAAAAACATTCTACACCTATATATCCTTTCTTTTGG  
AGAATGGATGATTTTTTTTTTTTATTCTTTCTTTTAGGCCTAAAGAAAAGATAATTAAAGAGAGAAAGTAGAGTTTG  
AAGAGAGAACTAAATAAAATAAGAGACAAAAGATCTATAATGATTCTTCATATATTTGAAGGATGAGCAAAAAT  
GGATGTAGGGTGATTCTTTATAATTTTTTTTGA AAAAATTTGTCTTGAGGTTCTGGATGTAAATGATCTTACAAC  
CAATCCTGATATTACTGGATAAAGATTCTTTTAAACTTGGTAAATGAACTTCCTTTAAATAGTCTATAAAATATG  
TTATATATCTATTTGTCAGGTAAAAATCACACACATACACACACACATATATAATGCAATAATAAAGTTAAAA  
GAAATTTTATGAAAAAGTCAAGTTCTTTTCATATACAAAAAGATACATGCATATCATTTTTATAGATTGTATCCG  
AAAAAGTTTCTCCAACCTTAATTTAGAAAAAAATTTCTATCCAATATTACCTAGTTAGGATCAAGATTCTCTAAAAAT  
TTTATCATATTGTACCATGTAAATTTTTTCAAATCTTAACAATTATTTTCAAATTAATTTACATAGTTTTTGTCA  
TATCACTCAAAAATATGATAACTATTAAGATGATAAATGCTGAATTATTA AAAATGACGAATATTGGGCACCAAA  
AAAAAAA AACTGATATAATAAAATTTTAACCACTAAATTTGAAGAAAATATTAGAGGATTGGAATAAATTTCT  
AGAAAATCTCTTGATCCATCTATGATCTACCTACCTACTTTTCCGTAATTTTCATATACCGATTGCATGCACACCA  
AAAGGCACAAGATTCAAAAACGTGCACAGTAGACCACCGCATGATGGTTTCTATATTAAGAGGTGTGGAAAGCCAG  
TGGGGCCATTAGTTAGAGCCGAAGACAACCTAACCTCCATGGTCCCACCAACATACTACAAAAACCCCCGACCC  
TTAAACGCACATGTTTAAATATTTCGATGGTTCGGTTTCGTCCCAATCAAAAAAATCGCCGCCCATATCGGCGCCATG  
AGGTTTAATTGGCCGAACATCACGCGAGGGCCCATCGTGAGTCACTGGTTCGGCGATCCTTTGATTTCTATTCTTA  
TCCTCGCCGATTCAAATCGTAGCTAAATTCGATCACAAACACACACGTGGCATCAGAGGACGTACTCGAGGCCCA  
TTCCCTGGCTGTAAAGTGACCGACATGCAGCTTCGAGAAAAGCCCCGCCCTCGTTGGTCTCACGGTGAATGTCTTT  
ACTGGGAACGGGTTAGACCGGTTCCCTAGCCGTTATTTTAGGTATATAAATAGGAACCTCCACAAAAACACATCTA  
TATATTTATGAGCTTTTGACAAAATCAAGTTAGAGAAAATAAGCAAAAAGAGACTTCCAAAAACTTTTCGACTCTCAA  
TCTCAAGAGCAGCTGAAATTTCAAGAAAATGCGGATTCTAGAAATTGCAATTGGTAATCCGGAAGAGGCGAGCCGA  
CCGGACGCGTTTAGAGCCGCATTCTGCTGAGTTTTTCTCTATGCTTATTTTTGTCTTTGCTGGAGAAGGCTCTGGC  
ATGGCTTTTATGTAAGATCTCAATTTCAAAAACACATCCTTTTTTTTTTTTGAAGTGAGAAAAAACACATCCAAT  
TTAATATAAGATTAAGTAACCAATAGATTTTTGGGCCTAAAAATTACGTTGACTGTTATATTCTAATGTTTTT  
CTTAATTTTGGTTGTAAAAAATTTCTGATTTGTTTATTACAAGCTTTGTGACATTACATGCTTTGGTCACAAAAT  
GATGACACCCACCCACCACCCAAAAAAGTGTTGCTTTCTTGAAATTTGCAAGGACTAATTGGTGGATGTTTTTG  
GCAGACAAGCTTACTGATAATGGGTCAACTACACCATCTGGGCTTGTAGCTGCAGCGTTGGCTCATGCATTTGCT  
CTTTTTGTGGCTGTTTCTGTTGGTGCAACATTTCTGGGGGCATGTAAACCTGCTGTGACTTTTGGTGCTTTT  
ATTGGTGGAACATTACTCTGTTGAGGACCATTCTGTATTGGATTGCACAGTTGCTCGGTTCAAGTTGTAGCTTGC  
TTGCTTCTTAAGTTTGGCACTGGTGGACTGGTAAGAATAGGGAAATGAGAATTCACATCGTAGACTAACCAATTT  
AATGCACTTTTTTTTGTCTTTGTCTATGATGAAGACTGCGTTTAGCATTTGCAATTTTGCATGTTTATAAAATGGATC  
ATTTAGGAGTCTACTTTTTAAAACTTGTGATTTGAAAACGTAAAAAATATGCATTTTAAATTTCTAGACAAAATGA  
GTGCGTTTTTTAAAAACACAAATTTAAAGGTTAAATTTGTAATTTTAAATGCAATTGTATTTTTTAAATTTGCGTTT  
TAAATTGCAAAATCCAAACAGCCCGGAAGCATCGACTGAAAAAGGGTTTTGGGATAAAACATAATGGTTGGTGCCCT  
AGCTAAGTTGAATTTGAACCTTGATCCACTGCAGGAAACATCAGCATTCTCCCTATCATCTGGCGTGTCTGTATGG  
AATGCGGTAGTTTTTTGAGATTGTGATGACCTTTGGGCTTGTCTACACTGTGTATGCCACGGCAGTGGAATCCAAAG  
AAGGGGAATGTAGGGACAGTTGCACCCATTGCAATTGGTTTCATTGTGGGTGCCAACATATTAGTTGGTGGTGCC  
TTTGATGGTGCATCCATGAACCCAGCAGTCTCCTTCGGCCCTGCCGTGGTTAGCTGGTCATGGACCAACCACTGG  
GTCTACTGGCTTGGCCCAATGGTCGGCGCAGCCATTGCAGCAATTGTCTATGACACCTCTTTATTGGCGAGCCT  
ACACACGAGCCACTTCCCCTAATGATTTCTAGGAATATTGATTTAAGCCTCTCCCTTTCTCTAGATTATTGAGA  
GAATAAAGATGGGGAAGAAATGCGATTGTTCTTGTCTAGTCTGGGGAATGGAATTGAATTTTCATGTGTACTTT  
TGTTGTAGGTGTTCTGTTTTTTTTCATTTATGCTCTAGGAAAGGGTGATCGAGCTTCTTGAATGTCTTGCTAAATC  
AGCGAATGAATGTTTGTGTTTTTGAACCTTACAAAAAATAAATTTGTTTGTGTTTGAACCTTGCCTAAATAACTGCG  
TTTTGTTCTGAACAATGATCAGAGAAAACAGAACTAATTGAAGTTTTGTGTAAGTACGAGCCGAAATTTTGATG  
GATCCGAGGAGGGGTAAAAACAACCTTATTATAACGGGATCTCGATCCGATAAAGACGGACTGTTTATAAGCTAAA  
GATACACCTAATCTCCAATTACTATGAATGTAGATAGGGGTTCCAATAGAAGTCCTTCCATTTTCATTTGTAAT  
TGTGAACCTCAATATTGGATCAATAAAAGTAGATTATATCAAGAAAAAGACAAGTTCAAAGAGAATGGCTGCCAA

AAAACAAAGAGATAAAAAAGAGGGAACTACTTAGGTTTTCTATAGTTTCAAATAGGTTTCATGTTAACTTATCG  
TCTAATTAATTAACGATATGTCATGTCAGACTAATCAATTATTACTACATGACTCTCGTTTGACATGTCATATGC  
CAACTATACATGTTACATGACACAGTTTCTTTAAATTACAAATATACATTTTTTTTTTTTATAAAAAAAGTTTGA  
AAAAAATTCATTATTTAGGGTATATTAGTAATTTAAAGTAACTATGCAAAGTTGGCAATGACGTATTGAACGATA  
GCCACATGGTATTAATTGATGAGTCTGACATGACATACTGTTAATTTAAATGGATGATAGGTTGACGGAATGACTT  
ATTGAAATCAAAGGAAAACTTAAAACTTAATTATCAAAATTGGAAATCTAAGGATCAAATTTGAAGTCGCAGGAA  
AATTTAGAGACTAAATTTGATTTGATTTGATTTTAAATTTTAAATTTTAAAAAACAAGTTGTGT  
GAACCATCTCTCACCAACTGGCCGAGGCGCAAATGCATATTTGTATACGAACATAAAGCCAAGCACAAAAAAGT  
GAAAACGATATGGTACACAATGAAGATTGGGATGACCATGAAGTTGGTTTTTGTTTTTTGAGTTCAATCTATTTT  
TTTTTTTTATGGATGACTTGACACTTGTGATGTGGCACTAACATTGAGTGTGAAATAAATGTTGGTGTGTCAA  
ATGAGATCCACGTGGCATATGACCAACTGTTGACTTTGACGTGAAGTGACAGAAGAACCCTCTTTAAAACTTAGGC

**>BpeTIP1;3**

**ATG**CCGATTTCTAGAAATTGCAATTGGTAATCCGGAAGAGGCGAGCCGACCGGACGCGTTTAGAGCCGCATTCGCT  
GAGTTTTTCTCTATGCTTATTTTTGTCTTTGCTGGAGAAGGCTCTGGCATGGCTTTTAACAAGCTTACTGATAAT  
GGGTCAACTACACCATCTGGGCTTGTAGCTGCAGCGTTGGCTCATGCATTTGCTCTTTTTGTGGCTGTTTCTGTT  
GGTGCAAACATTTCTGGGGGGCATGTAAACCTGCTGTGACTTTTGGTGCTTTTATTGGTGGAACATTACTCTG  
TTGAGGACCATTCTGTATTGGATTGCACAGTTGCTCGGTTGAGTTGTAGCTTGCTTCTTAAAGTTGCCACT  
GGTGGACTGGAACATCAGCATTCTCCCTATCATCTGGCGTGTCTGTATGGAATGCGGTAGTTTTTGAGATTGTG  
ATGACCTTTGGGCTTGTCTACACTGTGTATGCCACGGCAGTGGATCCAAAGAAGGGGAATGTAGGGACAGTTGCA  
CCCATTGCAATTGGTTTCATTGTGGGTGCCAACATATTAGTTGGTGGTGCCCTTGATGGTGATCCATGAACCCA  
GCAGTCTCCTTCGGCCCTGCCGTGGTTAGCTGGTCATGGACCAACCCTGCGGTCTACTGGCTTGCCCAATGGTC  
GGCGCAGCCATTGCAGCAATTGTCTATGACACCCTCTTTATTGGCGAGCCTACACACGAGCCACTTCCCCTAAT  
GATTTCT**AG**

**>BpeTIP1;3**

MPISRIAIGNPEEASRPDAFRAAFAEFFSMLIFVFAGEGSGMAFNKLTDNSTTPSGLVAAALAHAFALFVAVSV  
GANISGGHVNPVTFGAFIGNITLLRITILYWIAQLLGSVVACLLLFATGGLETSAFSLSSGSVWNAVVFV  
MTFGLVYTVYATAVDPKKNVGTVAPIAIGFIVGANILVGGAFDGAASMNPVSVFPAVVSWSWTNHWVYWLGPV  
GAAIAAIVYDTLFIGEPHETHEPLPTNDF\*

## **BpeTIP2;1**

**>FXXK01000666.1:158007-164214** *Betula pendula* genome assembly, contig:  
Contig665, whole genome shotgun sequence

**>Bpev01.c0665.g0011.m0001**

Chr Bpe\_Chr5 13,209,768-13,211,363 (-1) ::

complement(join(13209768..13210136,13210701..13210948,13211237..13211363))

**>BpeTIP2;1**

TCACCATCAAAGTTAATGATTTTTTTTATAATGCTACAAATTA AAAAGATTATTACGACAAAGAATATTGTTTTT  
ATTTTTGAAGTTGGCTTTTTTTTTTTTTTTTCCAATAGATGATTTAGAGCTTAATGATATAATATTGATATTAGGT  
GTTAATATGAATGCTAGTGTGTCAATTGAAATACACGTAACATATGACAAACTATTTATTTTGATAAAAAATGAT  
AGAATGACATATTTAAATCTGGATAAAATTCAATGACCATATTCTTGAAATTAGAAAAGTTAAAACTATATTTA  
AATCAAATAAAAAATTTAAGAGCTAAATATAATTTTTTCTTAAATATTATAAAACAACTCCATAAAATTTATAAGAT  
TCTAGATGTAAAAACGGAAGAGCAACCAAAAAAAAAAAAAAAAAATTTGCCATGATTTGTCCCAATTCATGAAAAACA  
AGCAGCAAAAAAATTTGTCAAAAAAAAAAAAAAAAAATTAACATATGCCCCCTCCCCATAAACTTTCTGGCTCCTGATC  
ATACATACATGATACATAGGGTGGAATCTAAAAATCACCTTTAACTCATCATGCACGCAAAAAAGAAGAGAAAAA  
GATCGAGTAAAAAACCTTTACGATGAAAGTGGTCATGAAAGTCAAACAATTAACGGGATTGTTTTCCAAATAAAA  
CCAACAGGCTAAAAAGGTTATTATAGAGTAAGATTCTCTTGATAATCGGCCACCTCCTATTGAATCCTATCCAC  
TCATTTTTTCAAATGCGCCACAACCTCTTGCCGATATTTGGAACATGGTCGGTGCTCCTTGTTGGCCCATGAGAGCG  
AGTCATGCCATGCCATGCCATCCATGCATGTGATCTCTTTCTTTATCCATCCATGATATAATATCCCTTTTTTC  
TTTTTCTCATGTCACTCAACTATCTAGTCACATGGTGAATCATTGATGAGCTTCCCGACATTTCCATTAAAGCA  
TGTTAGTGACAGCTAAGGGTACAGAGAAAAACCTGATTGGATATGGTCTTCATTTTCCATATATATATTCCTTTC  
TATTTCCAAACAAATATATACTACCGACAATAACAATACAATATTATGAACCTTAATATTATATTCACACACGTCG  
GTCTCTACTCTCTAGTCTCTAGTACTATATATATCATGCGACCTAGAAAAATTCATTTGTGCAAAAAATATCTCT  
AACAATATCCTTATCCTCTTAATCAATTAGCAGCACTACTAGCTTCTCAGGCC**ATG**GCCAGGATCGCCTTCGGAA  
GATTCGATGATTCGTTTCAGTGTGGGCTCTTTCAAGGCTTATCTTGCCGAGTTCATCTCAACCTTGCTCTTTGTTT  
TTGCTGGTGTGGTTCCGCTATAGCCTACAGTTACGTTCTCCATCCATCCCTGCTCCTCCCATCAACCCAC  
TCGATGCATCATGCATATTCTAATTTTTTTTTTTTGTGTAACATTAAGTGAAGTGTTTACCACCTGGAATCCCTGG  
CCGTACGTGCAAAAACTAGATAGTAATTAATTTTACAAAGGACTAATTACGTACTAATGTAAATTAATCATGTCA  
GTAAGCTATATATGGCCGTACAAAATTGTTGTTTTTCCCTCCTTTACAATATTTATTCTAACATTTTATTATTGT  
TTGTTTTGTGGGTGACAGATAAGTTAACATCGAATGCGGCACTTGATCCATCGGGGCTAGTAGGCATTGCAATTT  
GCCATGGGTTTGCTCTGTTTGTGTCAGTCGCTGTTGGAGCCAACATCTCCGGTGGCCATGTTAACCCAGCTGTCA

CCTTTGGATTGGCACTCGGCGGCCAAATCACACTCCTCACTGGCATCTTTTACTGGATCGCCAGCTTCTTGGCT  
CCATTGCCGCATGCTTCCTCCTCAAGGCAGTCACAGGCTTG**GTAATTGACGTTCTTCAAAAATATATCAATAATAT**  
**CTATGATTAACTTTTGTTTTTTTGGGTTAAAAACACTTGAGCCTTTTAAACTATTAATTATTTTTAAACTACAAT**  
**TTTATTGTAATTAAGTTATTTTTTTGTCACTTCTATAAAATTATCTTTATTTTCTTAAAACAAAATTAATTAATT**  
**AAAAACCAAAATAAAAAAATCAAAATTTTGTGTGTAGGTTTTTTTTTTTTTAAATTTAATTTTGATTTTTGA**  
**TTTTTGATTTCAATTTTTTAATTAATTAATTTTTTTAAGAAAATATAAGTATTTTGAAATATTGACAAAAAA**  
**TGACTTAATTACAATAAAATTGTAATTTAATATATCTAAGTATCACAAATTGTCGATTCAATCGGACTTTGTGAAAA**  
**TTACTTCTAGTTTAGAAAAGTTTTAAATGTATTTAATCCCGGCCCTTTGTTATTTTGGCACCCCTAACCTAGCTA**  
**CTATTATGAACATCTATCAAGGGAGTGTTAAGTACACAAAATCACTGAATTAATTAATTAATTAATTAATGCTTT**  
**TTCAGGCAATTCCCACCCATAGCGTTGCGTCAGGAGTGGGAGCCATTGAAGGAGTAGTGATGGAGATCATCATCA**  
**CCTTTGCTTTGGTTTACACGGTGTATGCAACAGCAGCCGACCCCAAGAAGGGTTCGCTAGGCACAATAGCACCTA**  
**TTGCCATTGGTTTCATTGTTGGTGCAAACATCCTGGCTGCCGGCCCATCTCCGGTGGATCCATGAACCCAGCCC**  
**GCTCCTTTGGGCCTGCAGTGGCCAGCGGTGACTTCCATGACAACCTGGATCTACTGGGCTGGGCCCCCTCGTTGGTG**  
**GGGGCTTAGCCGGCCTTATATATGGCAATGTGTTTCATGTACTCTCAACATGCACCTCTAACCAATGACTTC**TGA****  
**CGATTTCTTTCAATCCTTGTGTTCTCACTAGTCCACATGTGTTTCTATTAATAAAGGAGGAAAAGCAATTTTTG**  
**CTTTTCTTTCTTTTCTTTTCTTTTCTTTTCTTTTCTTTTCTTTTCTTTTCTTTTCTTTTCTTTTCTTTTCTTTT**  
**TTGCATGTAAACCTTGTTGGGTTCAAATGTTGCTTTATGAAAATGGATGAAGTTGGTGATGTGCAGCTACGATC**  
**ATTGTTATATATAAGTGTATGGTTTGCTCTTAACGTCTTGTATCTGTTTGGAGGGGAGGATGGCCCATCTTTGC**  
**AATAATGCACTAACTCCTTTGGACACACGCAAATTTATGGCTTCAACTTCTTTTCTTTTCTTTTCTTTTCTTTT**  
**AGTAATCTCTTCAACATTTTTTATTTTATTTTCTCTATCTTATTTAATTTACTGCAATGGTAGCTTTTGGCGCA**  
**ACATAATAGATAAGAAAAAGGAAAGAAAATTTGGTATAGCTCAATTTAGTTGCGGCTTGTGGTGTGAGGAAGGA**  
**GAAATGTTCTTTTTTTTTTCTTTTCTTTTCTTTTCTTTTCTTTTCTTTTCTTTTCTTTTCTTTTCTTTTCTTTT**  
**AATCAATCCTTAGATCAAATCTTGATTTCTTAGATCAATCTTAATTAATAATGATAAAAAATATGCAACGGTAGC**  
**TAGATTGAGTCTTGAGAAAATGTTAGAGAAAGCAAAATATTAATGTTCCATTTTCAGTTGATGTGGCATAACATT**  
**GCTAAAAACACGCATTAGCACCAAAATGTCAAACAAATTAATTTATATTTAGGGAAATGCTAGAATATTTACTCA**  
**AATTTTTATCCCATCATTTCTAAATATTACAATCACCATTAGATTTATGGATTTATGTAGATCTCATATGTGAGAC**  
**CCGCCCATTCATGGTGATGGTAATATTTAGAAGGATGAGAAAAGGATTTGGATAAATATCCTAACATTTCCCTT**

>**BpeTIP2;1**

**ATG**GCCAGGATCGCCTTCGGAAGATTCGATGATTCGTTTCAGTGTGGGCTCTTTCAAGGCTTATCTTGCCGAGTTC  
ATCTCAACCTTGCTCTTTGTTTTGCTGGTGTGGTTCCGCTATAGCCTACAATAAGTTAACATCGAATGCGGCA  
CTTGATCCATCGGGGCTAGTAGGCATTGCAATTTGCCATGGGTTTGCTCTGTTGTTGTCAGTCGCTGTTGGAGCC  
AACATCTCCGGTGGCCATGTTAACCCAGCTGTACCTTTGGATTGGCACTCGGCGGCCAAATCACACTCCTCACT  
GGCATCTTTTACTGGATCGCCAGCTTCTTGCTCCATTGCCGCATGCTTCTCTCAAGGCAGTCACAGGCTTG  
GCAATTTCCACCCATAGCGTTGCGTCAGGAGTGGGAGCCATTGAAGGAGTAGTGATGGAGATCATCATCACCTTT  
GCTTTGGTTTACACGGTGTATGCAACAGCAGCCGACCCCAAGAAGGGTTCGCTAGGCACAATAGCACCTATTGCC  
ATTGGTTTCATTGTTGGTGCAAACATCCTGGCTGCCGGCCCATCTCCGGTGGATCCATGAACCCAGCCCGCTCC  
TTTGGGCCTGCAGTGGCCAGCGGTGACTTCCATGACAACCTGGATCTACTGGGCTGGGCCCCCTCGTTGGTGGGGG  
TTAGCCGGCCTTATATATGGCAATGTGTTTCATGTACTCTCAACATGCACCTCTAACCAATGACTTC**TGA**

>**BpeTIP2;1**

MARIAFGRFDDSFVSGFSFKAYLAEFISTLLFVFAGVGSIAIYNKLTSSNAALDPSGLVIGIAICHGFALFVAVAVGA  
NISGGHVNPAVTFLGALGGQITLLTGIFYWIAQLLGSIAACFLKAVTGLAIPTHSVASGVGAIEGVVMEIITF  
ALVYTVYATAADPKKGLGTIAPIAIGFIVGANILAAGPFSGGSMNPARSFGPAVASGDFHDNWIYWAGPLVGGG  
LAGLIYGNVFMYSQHAPLTNDF\*

## **BpeTIP2;2**

>**FXXK01000121.1**|:1235422-1242022 *Betula pendula* genome assembly, contig:  
Contig120, whole genome shotgun sequence

>**Bpev01.c0120.g0064.m0001**

**Bpe**\_Chr14 4,812,457-4,815,151 (1) ::

join(4812457..4812583,4813368..4813579,4813642..4813664,4814779..4815151)

>**BpeTIP2;2**

TTTTTTAAAAAATAAAATTTACTCTTATAATCCCCTTAAAAATTAATTTTGGAGCCCTTAAATTTTGTATTT  
TTTTAGTTTACCCTCTAACTTCAAATGCTAGTTTACCCCAAAATCGGACATAATGATTAATTGGCATCAGACAA  
ACCTTAGTTAAATATTTTTCATATAAAAGAAACAAACGAGGCATCACACCAAATCCATTCCACAGTTCCACTAAT  
CAACCAAGCCTTTTATAACTAAATCGATTCCAATTGATTATAGTTCTAAATAATTTCTTGAGAACTTTGAAGACC  
GACCAAATTTTATTTTAAATTTATCTTAAATCATAGATTAATGAGGTTGCTGAAATCATACAGATATAACATTA  
ATATTATCGTTAATTAATAGATAATTTGCAATTATTTCTAAACATAGTGGATCCATACATGCTTATCTGTCCCTA  
CAAGACCATGCTTATCTCCAGATGTTTTAAATTTGTCGTTGTCTGTCCATTAATTAGTAGTTAAGTTGGTTGTC  
TTACGCTCATAATGCCTATAGTTTATCAAAACAAGGCGGTGGGTAGGCACCAAAAGCCAATCATACAACGCCCAT  
TTATTATTTCATGGTCGGTGCCGGCCATGGCCCTTTCTTCATATATAGCCTCTCGATCTGTATGTAGCACTAAGCC

ACTAACTATATAAACCATGCATGCACATTTCTAAGGCCTATCTAATTAAGCAGATCTCTTTAACGACGACTCTTG  
AGCTGATCCGTCGTCTTTCTTTTTCTAGTCAGCGAAA**ATG**GTGAAGTTGGCTTTTGGTCATTTTGGAGAGTCTTT  
CAACGTTGAGTCTCTCAAGGCTTATTTGGCTGAGTTTATTGCCACCCTTCTTTTCGTCTTTGCAGGCGTCGGTTC  
CGCCATTTCTTACGGTACGTAAGTGCGTCAAACATGATTCAACATATCGCAACGACAATCACATATTGCACGGAC  
AGAAATTTTCTCTAAGTTTGGTTAATTGAAAGTTTTTTTTTTTTTGTAAATTTAATTTAGTATATAATACTGTCAA  
GTGTTTATTGTGTTAAAGTATTGATTAAATGATTAAATTTATCTGTTTCTATCAGCTTAAGCTTTTTGAATAATC  
GGTGATTTAACATAGTATCAGAATAAGGTTCTGAGTTCAAATATTGATTCTGTTATTACTTCTCATTTCAAT  
TAAGTATTATGAGTGTTATAGTATTGATTAAATAATTAATGATTAAATTTATTTAATTTTAGATCAAACATATAA  
TTTTAAAGCCATGTAAGAGCGTGGGAGTAGGTGTAGCATTTCTTTTTTTCTTTTCTTTTTTATTTAAATGGCT  
GTAATAAGAAGATATTTAAACACGTTACGTCAACTGGTGTGATAAAAAATGTATGAAAAGTAGCATTACTAATTA  
TAAATAATGTGTTTCTCACATGCTAAGGAAACATAATAAATTTATAGACTGAATTAAAGAAAATTTCTCCTATTC  
AATTTAGAGAAAATTTGTGTGGTGACATGCACCTAATAAAACACGTAAAAATTTGTATTTATATGGAGAAATTTAC  
TAAAAATAAAAAAAGTCAAAACAAATGGTAAAAAATAAATTTATTTACAAAAGAACGAATTCATAGCTAGAAA  
TATTGTTTTTGTGAGAATGATCACTCGGTTATCTTCGATCTGTACAGGTAAGCTCACGTCAGATGCAGCCTTGG  
ACCCTGCAGGCCTTGTAGCGGTGGCGGTGGCCCATGCCTTTGCACCTTTTTGTGGGGGTGTCCATTGCGGCCAACCA  
TCTCCGGTGGCCATTTGAATCCAGCTGTACATTTGGATTGGCACTGGGAGGCAACATAACCATCCTAACTGGCCA  
TTTTCTATTGGATAGCCCAATGCCTTGGCTCCATTGTTGCTTGCCTCCTCCTCAATTCGTCACTAATGGCCTGG  
TACATTTCTTGGGAAAATTAGAATATTTTATTACAAATAATTTGGTCATAAAATTTAATGAATAGATTGGTGTAT  
TTGTTGGCCTATTAAAAAAGAGAGAGCGATTTTTGGAAAATAATCTCTTTCTTGAAAA  
GTAGGTCCTAATTGTTTGGAGCATAAGGTTATGACATTTTAGCTAATCAAAAATCATTATTTTCTTACGTATT  
AGTTTTTCAATAAAACTCTAACAGATTTTTTATTTTATTATTATTTCTTTAAATATTATTTTCTAATATATA  
TATATATATATTTTATTTTCTTAAATCATTAAGAGATAGGAAAAAGAAATGATTAAAAAAGAAATACATAAGCG  
GATTGGTGCTTACACAGTTACACTCCAATTAACAAAAAAGAACTGAACCAACAACTACCAACGATAGAAAGAA  
ACAATCACACAACCAGCTACAAGATCAGCATCAGACAATCTGCATAAACAAAACCTACAACCTATACAAAG  
CCAAGTCAAAACACATCACAGAAGAAATAAACACCAGGAGAAAGATTAAACCAAGATCTGTTGTAAGAGGTTCCA  
CATTTTACTTAGCTCCGATTCTCAGCAGTCAACTTAAGCCATAATGCTTACTTAAAGTAGCTAATCAAAAGCA  
AAATATGTATTTTAGATAAAGGAGAAGACAAGGTCATGGATTTGATTTTTGCCTCATATTAGCTAAATATACACA  
ATATAAAAGTTTTAAACAAATGCTCTTAAAACTCTTTATTTTCTGTGCTCAAAAATAAAAAACATTAAAAAACAATA  
CAAAAACAACATGCTCCTCAAAACACACAAACATTTTTTCATTTTTATGTACATAAGGACACTTTTTCAAAAAA  
AAAAAAAAAAAAAAAAAACCTCCACCAAAATACATTAACAAATAGAGTGATAATTTTGTCAAATAATAGAG  
ATTAAGAAAAATATCTTTGAGGTTTCCACCTAAATTTTATTCTTTGAAAGCCAAAATAGAAGAAATGACGCTTA  
ATGTGTATATATATATATATATATATATATATATATATATATATATATATATATATATATATATATATATAT  
CAGGTTTTTTACTTGACCTTGAATTTGGCAGAGCATCCCAACACACGGAGTTGCTTCAGGAATGAATGAGTTGA  
AGGCGTGGTGATGGAGATTGTACATAACCTTTGCACCTTGTCTACACTGTCTATGCCACTGCTGCTGACCCCCAAAA  
GGGCTCACTCGGCATAATTGCACCTATTGCAATTGGGTTTCATCGTCGGAGCAACATCTTGGCTGCTGGTCCATT  
TAGTGGCGGGTCGATGAACCCGGCCCGCTCATTCCGTCGGCCGTTGTTAGCGGAGACTTCTCCCAAAATTTGGAT  
CTACTGGGTTGGTCCCCTTATTGGGGGAGGGTTGGCTGGGCTGGTATATGGAGGCATTTTTATTGGCTCCTATGA  
GCCTCTGCCACCCTCTCAAGACTATGCC**TAA**AGTAAAGAGACTTCTTCTGGGATTTGGGTTTCTTCTATCTTTTG  
GGTTTCATATTGTGCTTCTCCATGTCCAGCCCAAAAGATATTGTACGTGTTAATAAAATTTGGAAATGATGAATC  
AAATTGGCTTTCTGTTGATGTCAATTTTTTTTTTCTTAAAAAAATTTGTTAAATATTGTGCTTCTCCATGTCCAGCC  
CAAAAAGATATTGTACGTGTTAATAAAATTTGGAAATGATGAATCAAATTTGGCTTTCTGTTGATGTCAATTTTTTTT  
TATGAAAAAAATTTGTTAAATATTCTGTCTTAAATTTGGGCAATGGGCCCAATTTTTTCTTTTTCTTTCTTTT  
TTTTTTTAAAAAATATATATATATATATATATATATATATATATATATATATATATATATATATATATATAT  
AGAAACAAGTGAAAACCATGAATGTCCATCTTCCAAGTTTCAAGTAGGGTGACTGTTGGTTAGAGCTAGCAATTT  
TTTATATAAATTCGTGAATTCGAAATGAATCTAATATGAAATTTAGTGTGTTTAGGTTGAGTCTGACCCGTTTA  
ATTAATAAGTCGGGTTATGATTAACCTATATAATCTTATATCTAGAGGTGTAAATGAGCTCAACAACTAGTGA  
ACTTAACTCAGTTAAGTTTTTTTGGAGCAATTTGACAGCATGGTGTAATTTGCTATTTATGCATAACCTTGGAAG

>**BpeTIP2;2**

**ATG**GTGAAGTTGGCTTTTGGTCATTTTGGAGAGTCTTTCAACGTTGAGTCTCTCAAGGCTTATTTGGCTGAGTTT  
ATTGCCACCCTTCTTTTCGTCTTTGCAGGCGTCGGTTCCGCCATTTCTTACGGTAAGCTCACGTCAGATGCAGCC  
TTGGACCCTGCAGGCCTTGTAGCGGTGGCGGTGGCCCATGCCTTTGCACCTTTTTGTGGGGGTGTCCATTGCGGCC  
AACATCTCCGGTGGCCATTTGAATCCAGCTGTACATTTGGATTGGCACTGGGAGGCAACATAACCATCCTAACT  
GGCATTTTCTATTGGATAGCCCAATGCCTTGGCTCCATTGTTGCTTGCCTCCTCCTCAATTCGTCACTAATGGC  
CTGAGCATCCCAACACACGGAGTTGCTTCAGGAATGAATGCAGTTGAAGGCGTGGTGATGGAGATTGTCATAACC  
TTTGCACTTGTCTACACTGTCTATGCCACTGCTGCTGACCCCCAAAAAGGGCTCACTCGGCATAATTGCACCTATT  
GCAATTTGGGTTTCATCGTCGGAGCAACATCTTGGCTGCTGCTGATTTAGTGGCGGGTCGATGAACCCGGCCGC  
TCATTCGGTCCGGCCTTGTAGCGGAGACTTCTCCCAAAATTTGGATCTACTGGGTTGGTCCCCCTTATTGGGGGA  
GGGTTGGCTGGGCTGGTATATGGAGGCATTTTTATTGGCTCCTATGAGCCTCTGCCACCCTCTCAAGACTATGCC  
**TAA**

>**BpeTIP2;2**

MVKLAFGHFGESEFNVESLKAYLAEFIATLLFVFAGVGS AISYKLTSDAALDPAGLVAVAVAHAFALFVGVSIAA  
NISGGHLNPAVTFGLALGGNITILTGIFYWIAQCLGSIVACLLQLQFVTNGLSIPTHGVASGMNAVEGVVMEIVIT

FALVYTVYATAADPKKGLGIIAPIAIGFIVGANILAAGPFSGGSMNPARSFGPVVSQDFSQNWIIYVWGPLIGG  
GLAGLVYGGIFIGSYEPLPPSQDYA\*

## BpeTIP3;1

>FXXK01001027.1|:34394-36563 *Betula pendula* genome assembly, contig:  
Contig1026, whole genome shotgun sequence  
>Bpev01.c1026.g0003.m0001  
Bpe\_Chr7 20,005,317-20,006,689 (-1) ::  
complement(join(20005317..20005703,20006202..20006452,20006560..20006689))

## >BpeTIP3;1

AAATCCTAGAAAGCACACTACATAGCTCCCCAAGCATTTTAAATTCGAGAGAGGGGTAGATGGGAAGCTAGAGACC  
TTCGAGGCAAGTTTGTGCAAAAAGTTTACTTAGAAAAGAAGAGATTGACGATTAGAAAACCTTTTCATCAGTA  
GTCATGCTTAAGTCTATTAAGATACTTTTAGCCCGTTGCCGCTCATCTAAATTTTGAGATTTGGCAAAATGAATGT  
CAAAACATCCTTTTTAAATGGGTGACTTAACGGGGATATTTCTATGATGCAGCCAGATTATTGTTTTGTAGCTGA  
GAGCCAAGAAAGTATGGTATGCAAATTGCAAATATCCTTTTATGGACTTAAGCAAACATTTAGATCATTGAACAT  
TAGTTTTGATAAGACAATTAACAGTTAAGTTTTGAACAAAATCTCAATGAACCATGTGTGTACAAGAAGTGTCA  
AGACAGAGTAGCAACATACTTGGTGTATGATATTGATGATATCCTAGTCATTGGGAATGGTGTATGGACATTATC  
AACAACAAGGATCTGGTTGTCTAATCAGTTTGATATGAAAAAATTGAGAGAAGCAAGTTATATCCTAAAGATCAA  
GCTCTTGTGAGATCGCAAAAATATGATGATAGACTTATCCTAAGATAGATACATAAAATAATATCTTGTCTGGATT  
TAGCATGCTATACTCCAAGAAGGGATTAATACCCTTTAGGCATGAAATACCTCTTACTAAAAGAGTAGTGTCTTAA  
GACACCTCAAAAGGAAGAACAATGATGACTGTTCTTATGCTTCGATTGTAGGAAGCCTCATGTATGCTATGTT  
ATATACTAGATTATGTAAATGTAAATATAATGATTACATAAGTATCTAATAATAATATTAATTAGAGCATATAATG  
GTTAAATATTAAGCAACCTATATAAATATAATATATATTACGTAATTACTAATATACATACTTTGATACTCATAT  
ATATATATATAAAACCCATTTTAAATAATATATATACCAAGCTAACGAGTTGAGTCGGATGAGCTAGTCAGGTTG  
AGGTAGTCAGGTTAAGCTTTATACGAGCTAGGCTTGCGAGCCTTAAACAAGCTGAGCGAACGGCCGGATCGAGCT  
TTAAACGAGTTAAGCTCACAAGCCTAGATATGTATTACTTACTATTTGAGCGTGCGGATTTCTACAGTAATAAAT  
GAGTTTGTACAATATCCTATTCAAATTCGGATTGGACTTCAAGTGAGTTGTGGAACGGACTTTTTTATTTAAGCC  
CTATGTATTGAGAAGGCAATGTGCCGAAACCGAACCAAAAGCTTCTAGCTAGTAAAGCATGTATTAATTGGTGC  
TGGACCTAGATTTTAGGTAGCGTGGGGGGTTAACCATATCTTCAGTCGAGGATGAAGTTAACCTTGTGTCCAAAC  
GCATCCACTTCTGGTGATGATAGAGTTGGGTACGCATCGACTTCTAGTGATGATAAGAGTTGGGTGTACGGAGAA  
TACTTTCAAAAGAAGAAATAGATAGACACTGTTCCAGCTGGAATTGGAATCAATAGTTAACACATCTACGTGTCA  
GCCTTGGCGCACGAGGTGTGCGCAAGTGTCGTATAACTCCATCCCCCATTTGGCCGATTTATTCAATAACCTCC  
ACCTTTTCAGCCATGCAAACTCTCATCCACCTTGCTTTTCTTAATATCATATCCTTCTCGTCACCATTTTCATCT  
CCTAAACAACACACTAACAACTGGATATTGCTTCGAATTAAGAACTAAAAAGGTTTCAGAACTGCAAAAAA  
GAAAGAAAAAACAGGGCTATTAATCTCTTGCCACCATTGCCCCGGAGATATGCGTTTGGGAGGGCTGAAGATGC  
CACCACCCCCGACTCCATGAGAGCCGCTTATCAGAATTCATCGCCACTTTCATCTTTGTCTTTGCGCGCGAAGG  
CTCTTTACTAGCTCTCGGTTTGTCCATCGCTCTCTACAACATGCAATCCTATATTTAATTTATGGTATTAAATTG  
TAGTTGGTGATGGTGATGGTGATGGTGATGGTGATGGTGATGGTGATGGTGATGGTGATGGTGATGGTGATGGTG  
ACTCCGTCGGAGCTAGTGGCCATCGCACTCGCGCATGCATTCTCCCTCTTTGCAGCAGTGGCAGCCAGCCTCAAT  
ATATCCGGCGGTCTATGTCAATCCTGCCGTACCTTTGGCACCTACTCGGCGGAAGGATCTCCGTTCTCCGTGCC  
GTCTTCTACTGGATTGCCAGCTTTTGGGTGCTGTTGTGGCTTCACTTCTGCTCAGGCTTGTACCAATAACATG  
GTACAACATGCCCACTTAATTTTTTTTTTTTTTAAACAGAGTATCTTCGAGACTTCCACACGGGTCAGTAAAG  
CTCGAAGCTAAGTAATTTCAAAAAATTGTTTGTACTTAAAGATTAAACCTTTGACATCATAGGCGAAACCAACC  
CTTGGCTTGGGTCCCTAGCCACCCAAAATTTTAAAAAACATCATAAAAAATTTGAAAAATTTCTTCTAAATTTAGT  
GTATTTTTATGAAATAAACCCCAAAAATAATTTTTACGTCCAATCACTTTTTTTTTTTGATTTTGTCACTCCTCT  
CCTAAACTCCTAGTTAAATCCTTAGTTCCACTCCTTTTTGACATGATGTTTCTCAGGAGTCACCAGAATAAAGTG  
ACTTATCACTCGAGTTAACCTTAGGCCGGGTGCAATGTTCCGAATTAATTTGGTTCAAAAAACACTTTGGTGA  
ATTTAATGTTTATTATAGCATGTTATGATGTTTATGGTGGTTTTCAGAGACCAGTGGGGTTCTACGTGACGTCA  
GGCGTTGGGGAGTGGCACGGACTTATATTTGAGATCGTGATGACATTACGCTGGTCTACACGGTTTTTGGCGACC  
GCCATTGATCCCAAACGGGGTAGCTTGGGGACGATTGCGCCGTTGGCAATCGGTTTTCATCGTCCGAGCGAATATT  
CTGGCGGGTGGGCCGTTTGGACGGAGCATGCATGAACCTGCCAGGGCTTTTGGGCCGGCTTTGGTCCGGGTGGAGA  
TGGAGGAACCACTGGATCTACTGGGTCCGCCCACTTTTAGGAGGTGGGCTTGCAGGCCAGTATATGAGTACATG  
GTGATACCCACGGAGGTTCTCATCACACCCACCAGCCCTTGCTCCAGAAGATTACTAGTTCTTCTCATCCCTG  
TTTGTGTGTAATAAAATTGCAAGTGGTTTGGCCTTTGCTTTTGTGTTGCTTTCTTTTTTAAATATGTTTTGGGTTT  
CTAGCTTCTGAGTTTGTTCATTGTCTGCAAGTGTTGTACCTAGTTACTTGTAAATAAAATGACAACCTAGTTGTT  
CATTGTCTCCCATGTAATTTCTTTTTTACCCTTTCCAATGTTTTGCTTAGAGAAAACAACTGTTAATTTTACGTGA  
GGTTAAATATACAAAGGCCATTTGGGTGTAGTAAATAAATGTGGTTTTCTTCCGTCATGAAATGATTGTCACCCC  
AATCCGTCCATCAGACAGTATGGTGACTTGACATCATCTAAGTTTTTCATCCCTGCTGCTGTATTACCATTAGACA  
GAGTGATCTCCACCCGTGACCAACACAATCTTCTAGCCCACTAGACTAGCTATGTTTCAGATATTGAAAACTCAA

**>BpeTIP3;1**

**ATG**CCCCGAGATATGCGTTTGGGAGGGCTGAAGATGCCACCCACCCCGACTCCATGAGAGCCGCCCTTATCAGAA  
TTCATCGCCACTTTTCATCTTTGTCTTTGCCGGCGAAGGCTCTTTACTAGCTCTCATCTACAAGGATACAGGCAGT  
ACTCCGTCGGAGCTAGTGGCCATCGCACTCGCGCATGCATTCTCCCTCTTTGCAGCAGTGGCAGCCAGCCTCAAT  
ATATCCGGCGGTCTATGTCAATCCTGCCGTCACCTTTGGCACCTACTCGGCGGAAGGATCTCCGTTCTCCGTGCC  
GTCTTCTACTGGATTGCCAGCTTTTGGGTGCTGTTGTGGCTTCACTTCTGCTCAGGCTTGTACCAATAACATG  
AGACCAGTGGGGTTCTACGTGACGTCAGGCGTTGGGGAGTGGCACGGACTTATATTTGAGATCGTGATGACATTC  
ACGCTGGTCTACACGGTTTTTTCGACCGCCATTGATCCCAAACGGGGTAGCTTGGGGACGATTGCGCCGTTGGCA  
ATCGGTTTTCATCGTCGGAGCGAATATTCTGGCGGGTGGGCCGTTTGACGGAGCATGCATGAACCCTGCCAGGGCT  
TTTGGGCCGGCTTTGGTCGGGTGGAGATGGAGGAACCACTGGATCTACTGGGTCGGCCCACTTTTAGGAGGTGGG  
CTTGACGGCCTAGTATATGAGTACATGGTGATACCCACGGAGGTTCTCATCACACCCACCAGCCCTTGCTCCA  
GAAGATTAC**TAG**

**>BpeTIP3;1**

MPRRYAFGRAEDATHPDSMRAALSEFIATFIFVFAGEGSLALAIYKDTGSTPSELVAIALAHAFSLFAAVAASLN  
ISGGHVNPAVTFGTLTGGRISVLRVAFYWIAQLLGAVVASLLRLVTNNMRPVGFYVTSVGVEWHGLIFEIVMTF  
TLVYTVFATAIDPKRGSGLTIAPLAIGFIVGANILAGGPFDGACMNPARAFGPALVGWRWRNHWIYWVGPLLGGG  
LAGLVYEYVMVIPTEVPHHTHQPLAPEDY\*

**BpeTIP4;1**

**>FXXK01000922.1:34590-41021** *Betula pendula* genome assembly, contig:

Contig921, whole genome shotgun sequence

**>Bpev01.c0921.g0003.m0001**

Chr *Bpe*\_Chr9 15,031,065-15,032,014 (-1) ::

complement(join(15031065..15031442,15031546..15031784,15031888..15032014))

**>BpeTIP4;1**

CATTCTCCCCCTAGCCAATACTGTGCCCATTTGCTTTTTTTTTTTTTTGTGTTTTTTTCTTGACTTAAGCATTGGA  
GGTGGTTTTTTAGTGGTCCAGCTTTTCTGCTCTTTTGTCTTTTCTTGCAAATATTTTGGACGGAGAGTTTGATGTGT  
TATCACTGTATCAACAATAATGAATCAAAAGACAAAACGACCTTAACCAGTCAAAAATATCTTCTCCACCACTTC  
TTTGTCAATGACAAAGAAGTTCTCCAATTTTAAAGTAAATATCTAGATATTAATGTAAACTTCATATTTAGATAT  
TAATGTAAACTTCATATCTAGATATTAATGTAAACTTCATGACAAAGAAGTTTTCAATCAAATATGAAGTTCTC  
CAATTTTCTTGAATCCTCAACAACCATATTTTCAGCCAAAAAAAACAGTAAAGAAAAACAAATATTTATTTTCCTT  
TCTGAGCGAAGAAAAAAAACAGAAGACTATTGCATTTCTATTTTTTTTAAAGAAAAACAAATGACCAAGTCCTT  
CTCATCCCAAAATTATTTCCGAACGACGTCATTGGCTACTGACGTAGTCTTCGTTTACTACAAAAATAAGCATT  
TATCAGTACTTATTTGCCGGCGCTTATGTTAAATACCGACATTTGTCTTATTACCGATACTTGTTTTCTGGCAC  
ATCTTGACAAAGTGCTGGAAGATGTGTGCGTAAAGTAATTTTTTTTGTAGTCTTTCAGTTTGTGGAACCTC  
ACAGATCGGGGAAATTAAGAGTTGAAAGAAAAATTATGATTTATTAGTTACTTCTCTAAGGTTTAATTTAGAATT  
AAAGTGAAGCCCTGAGAATTTTTACTCCAAATTAATAATTTTTCATGAAATTTTGGGTTTTCCAATACTCATTGC  
TCGTATATTTGCATGGATGGACCAACTAAGTGCGGCTAAATTGGTTAGAATATTTTCTAGCTCCGTGGAGAACTA  
AGCAATATATGAATAGGTAATTAGTTTTTGGCCATATCTTTTGACCATAAAATTAAGCTTACAAACGTTGCTAGCT  
AGTCCATGGGCATTGGCGTAATTTAATTAGTCAACAATTATTTTATTGCATGATCGATAAGATGCGATCACATGC  
AGTGCGTCATCATCCAAAAACAAATGCCATTATTACTAGTAAAAATAATAGTGCAACCTAGTAGTGCCGATATT  
ATATATAGCATATGCCAACGCAGCAGCAAGGCAACCCAAAGTTGAAGCTTTTGTAGCAACTAATTAAGTTTAAGG  
AGTAGTACTCTCTTTACTCTTTAGGCGTTGCCTTCTAAAGGTACATATTTTTTGGTCT**ATG**CGGAAAAATTGCCTT  
GGGAACCACCCGAGAGGCCACACAGCCTGACTGCATCAAAGCCCTTGTGCTCGAGTTCATTACAACCTTCCCTTT  
TGTATTTGCTGGAGTCGGATCCGCCATGGCAGCCG**GTAATTATTTCATTTTTACTTTTTTAATTAATTACTTTTCGTTG**  
**AAACTATATATATATATATTTTTTTATTATAACCAAATCGTGTGCATGCATGGCTTTGATGAACAGATAAGCTAGATT**  
CAGGTTGCTGGTGGGGTTGTTTGTGCTGTGGCTATCACACATGCACCTGTTGTGGCGGTGATGATATCCGCCGGCC  
ACATATCCGGCGGTCTATCTTAACCCGGCAGTCACGCTTGGCCTCCTCGCCGGCGGCCACATCACCATCTTCCGCT  
CCTTTCTTTATTGGATCGATCAATTATTAGCAGCTTCAGCCGCTTGTATTATTCTTTACTACATTACTGGCGGAT  
TGGTGAGTCAAATGGCAATGGCTCTTTTTTTTTTGTTTTTTAAATTGTATTGATAATAAAAACTTACTTTGTGTTT  
TTTTTTTTTGGTTTTGTTTTGTGGATGCAGACTACTCCAATCCATTCACTTGCAAGTGGGGTTCGGGTACTTGCAA  
GGGGTAATATGGGAGGTTATTCTGACCTTCTCCTTGTGTTCACTGTGTATGCTACCATAGTGGAACCCCAAGAAG  
GGGGCTCTTGATGGATTGGGCCCAACTCTTACTGGGTTTGTGTTGGGGGCCAACATCTTAGCTGGTGGGGCTTTC  
TCAGGGGCTCAATGAACCCGGCACGGTCCTTTGGACCCGCTTTGATAAGCGGGGACTGGACTGATCACTGGGTT  
TACTGGGTCGGCCCACTATTGGTGGTGCGCTTGTGTTTACTATGAAAATTCTTTCATCGTCAGATCTCAT  
GTCCCTATTCTACTGAGGAAGAACGTTAC**TAA**TTGTCCTCATCTCTCTAAAGTTTATTAGCCCTTCTCTTAAGT  
ATTACTTTTTTTTTGTAAGTTTTCTTTATGTATTCTAGTGCTGCCTTTTCTTGTGTTCCCATTTTCCCTATGCATG  
GTATTATTATCTATCGGGAGCAAATGCTTCTATGAGATTCTATTGTGCAACAGCAAGAGTTCTTAATTGGATTAT  
CTGGGAAAAAGAATTAACATTACTTTATTTTCTTCTAGATGACTTTGCGAGTGCTTAAACGTGTCAGGTCTCGTT  
ATTTAATGTTAAGGTCAACATCAATGGCAAATGCACACTTGAATTTTTATGTCTTTTTTGGTACAAATCAAATA



GGCAAACCAACTCACAAACACTAACAAAATAATAATAATAAAAAAAAAATCCATAACCCAAAAGAAGACACTAAAAAT  
TTTTACCTGCAAAACCTTTCAATGCAAAGGGAAAAATTACAGGACATAGTTCAGTTAAATCTTCTACAATGAACA  
ACAAAGGGCTTACAAATATCGTCCCCTAGAAGATTTTTTTAGAGGCGCTACCAACATATCAAAAATAGATATATTC  
TTGGGTTACAACATCAATTCATCAGCTTAAGGTGGATTCCAATAAGAACAAACAAAAGAAAAATCTCAAAAAGTGGG

>**BpeTIP4;1**

**ATG**GCGAAAAATTGCCTTGGGAACCAACCCGAGAGGCCACACAGCCTGACTGCATCAAAGCCCTTGTCGTCGAGTTC  
ATTACAACCTTCCTTTTTTGTATTTGCTGGAGTCGGATCCGCCATGGCAGCCGATAAGCTAGATTCAGGTTTCGCTG  
GTGGGGTTGTTTGTCTGTGGCTATCACACATGCACCTGTTGTGGCGGTGATGATATCCGCCGCCACATATCCGGC  
GGTCATCTTAACCCGGCAGTCACGCTTGGCCTCCTCGCCGGCGGCCACATCACCATCTTCCGCTCCTTTCTTTAT  
TGGATCGATCAATTATTAGCAGCTTCAGCCGCTTGTATTATTCTTTACTACATTACTGGCGGATTGACTACTCCA  
ATCCATTCACTTGCAAGTGGGGTCGGGTACTTGCAAGGGGTAATATGGGAGGTTATTCTGACCTTCTCCTTGTTG  
TTCCTGTGTATGCTACCATAGTGGACCCCAAGAAGGGGGCTCTTGATGGATTGGGCCCAACTCTTACTGGGTTT  
GTTGTGGGGGCCAACATCTTAGCTGGTGGGGCTTTCTCAGGGGCCTCAATGAACCCGGCACGGTCTTTTGGACCC  
GCTTTGATAAGCGGGGACTGGACTGATCACTGGGTTTACTGGGTTCGGCCCACTCATTTGGTGGTGGCCTTGCTGGT  
TTTATCTATGAAATTTCTTCATCGTCAGATCTCATGTCCCTATTCTTACTGAGGAAGAACGTTAC**TAA**

>**BpeTIP4;1**

MAKIALGTTTREATQPDICIKALVVEFITTFRLFVFAGVGSAMAADKLDGSLVGLFAVAITHALVVAVMISAGHISG  
GHLNPAVTLGLLAGGHITIFRSFLYWIDQLAASAACIILYYITGGLTTPIHSLASGVGYLQGVIVEVILTFSL  
FTVYATIVDPKKGALDGLPRTLTFVVGANILAGGAFSGASMNPARSFGLPALISGDWTDHVVYVWGPLIGGGLAG  
FIYENFFIVRSHVPIPTTEERY\*

## **BpeTIP5;1**

>**FXXK01000478.1**:207000-215500 *Betula pendula* genome assembly, contig:

Contig477, whole genome shotgun sequence

>**Bpev01.c0477.g0022.m0001**

Contig477 209,208-211,230 (1) ::

join(209208..209337,209424..209674,210865..211230)

>**BpeTIP5;1**

ACACATTCCACACAAAGAGGCATCTCGAGAGATAGAATAACAAGCATATAAGATCTATGTGCAATTTCAACAGAA  
CATTGACTAGAAATTAACGCAAAAAATAAGGTCAATTAATATACTAACTGTGAAAAATAAAACAAAAATAAAGA  
TTCAAAGAAAACAAGTTACACCTACAACCAACTGTTGGGGATTCCACCTTAGAGAATTCCATAGACATCCACCTC  
TGCTTGGTTGCAGAGAAACTCGAAGACAGTGAAAGAAAAATAAAAAATTAAGCGCTAAGTTTGTACATTTTGCT  
TTCATGGTTACCTGTGGGCTGTGGCCTGTGGCTAGAACTTTGTCTGAGATCTGCAGTCGGCTTGTTTGGCCGTC  
GATTTCGCTTGATCTCTCAGACTCCGTTAGCCTGATAATCATTGATACGGAAGTGAAGGCTTAAACGGAGCACCAAA  
ATGGTGAGAAAGGGACTAGTTCTTTTTTTTTTTTCTCGAGAAAGGGACTAGTTTACGCGAAGTTGATCCCTTTTC  
TTTTCTTTTTTTGCTTTTTTTTTTTTTTGGTTAGCCTCCGCGTGTTCGACGTATTAATGTCAAAATATTTTTGATAGA  
AAATAATTTTAGAAAAAATATTAATTTTGTAATGTTTGCTGATACTTTGAAAATGATTATAAGGTTTAAAGGAT  
GGTTTTACATTGAAAATTATTAATATTTTCATCTGAACCTATATAATTAATAATTTTATTCATAATAAAATATAA  
TAAAAATTATAAGATTCCATTTAATAATTTAATAAATGGATTTTTTTTTGAAAAATAATAAACTTTAAAAATATC  
CACATACATATATATTAATGTTTTTTTTTTTTTTGTAAGTGTATAATATTCAATTTAAGTCAACATTTTTTTCTC  
TTATTACCATAAAATTTTCTTTACTTTTTACTTACAAAATATTTAAATCTACTTTGATTTTATATCATATCTAC  
CGCAGGTGACACATTTTATTTGAGTCTACGCAAAAAAATGGAACAATTAACACTTCTACTATTAAGATGAC  
TAGCAATTAGGATAAAATGACCTATTTGTCAAATTGCCAAAACCTCAAAGTTATAATTGTCAAAATTAAGAACTCA  
AACTCAAATTTTATTTATCTCAGAATGCAAACTTAAAGAGATTTTAGAGCAATTTTCTTTCTTTTTTTATAAT  
AAAGAAGATGGTAAAAAGTGAGAAATTATATTTGACAGGGTGGGCTCGGTCGGTGGGCGCAACCCGGACGATTG  
TGCAAGAGAAATACAACCGTATAAACACACCCCGCAGCTGGCATAGCGGTAAATGTTTGAAATCCAAAGCCC  
TGCTGAAACGTTGCAACCGAACCCCTCCTTCGAAGTTTGGAAGTGCCTCAACTACGCATTATATATCAACAACCT  
TCCATTCTCTCACTAGAGTATATAGCGAGAAAAATTTTTAAATAAACCAAAAATCCGATCAAATGTTTGATAGT  
CTTTCACACTCTGAAATCAAGTAATTCCTCGTCTTATTGGCAGAAAA**ATG**GGTCCAACAATGGTAGCCGCCCGT  
TTCCAACATTCTGTCACTCCTAATGCGCTTCGATCATATCTCGCGGAGTTTCTCTCCACATTCTTCTACGTCCTT  
GCGGTTGTGGGTTCTGCCATGTCATCGCGTGAGTTTTTAATTTTCTTTGGAGAATTTTTGCATACCATTTTTGTT  
TGTTTTATTAAGTGGTCGTTGGAGTTTGGGATTGGTAGGGAAATTTGATGCCAGATGTTGCGTCGGATGCATCCA  
GTTTGGTCTGGTTGCCATACCAATGCCTTTGCATTGTGGCAGCCGTGTATGTTGCAGCGAACATCTCCGGTG  
GGCATGTGAATCCGGCTGTACATTTGGAATGGCGGTGGAGGCCACATTAGTGTCCCAACCGCTTTGTTTTACT  
GGCTTTGCGAGATGCTGGCCTCTGTTATGGCTAGCCTTCTCTGAAGATGACCGTTGTTGGACAG**GTAAAAGAAA**  
**ACCTTTCACATTCTAGTCGTCTTATATATAATTTGCAACACTCAAGAGCACCTTTAAACTAGACAAAGAAAA**  
**AAAAAAACATCTCTAGATAAAATTCACCTTTTTTGGCTTCCGTTGTACCCAGTTTCATGAAAAACATCATCAGTAG**  
**TAAGCAGCCATGCATGCAGGTAGGGTAGGTGAGCAATTTTTTATACAACCTTGCAACATGACACGAAAAATAATAT**  
**GAAATTAATGGGTTAGAGTCGAAGTGTTAACCTGTTTAATTAATAAGTTAAGTTATGATTAACATATATAGTC**  
**TTATGTAATCCCAAGGGGTTGGGTCAAGTGGAAGGGTCTTGATTTTTGTGGTAGTCTCATGAGGTGTAAGGTTT**

AAATCCTCTTGGGTGCAAACAATTTCTTGGGGCCAGCCCGCCGGCAAAGCCAGAGTATTATCCGATCTGTATGGA  
GGGGGCGCTTTACACAGGTCTGAAGTTTACCTGACAGGGGGGTTGGTTTACGAAGTGACCTGCTTTGGAGGGTTG  
GAGTATTACCCGATTTGTGTGGAGGGGCACTTTACACAGGTCCGAAGTTTACCTGACAGGGGGTTGGTTTACGAAG  
TGACCTGCTTTTGAGGGGGTTCTTCGTTATAAAAAAAAAAAAAATATAGTCTTATATCCATGTTTCGATACAAGCCG  
AACTCGACACACAATATATAGGACAAACAATTTTTTACACAATTTGTGAACCTACAAAAAATTAACAGGTTAGA  
GTTGATAGGTTTGAACCGTTTAATTAAATGAGTTAAATTATAGTTAATCTTTATAGTCTTTTACTTATGGACGAA  
ACTAGAAAGTTAAGTTTTAGAAGACTAGATTACATGAAATTTTTTTTTGAAGGGCCAAAAATAAAAAATATGACCA  
AAAAATGTGTATTTATTAACAAATTTAAAGCTTAAAAAAGACAAATTTAACAAAAAAATTTGCTAGAGGGGTTTG  
GAGGGACCCATGCTCCCCTCTGTTCCCCCTCTAATTTTTTCACTACTTTATTTACCTATGTCTCGTTACGACCTA  
AACCTGCATGCTTTATGAACTAGAAATTTTTATATTGTGTAGTGGATCAATTGAATAGAGCTGTTGATTGGCAT  
AGAAATATTTATAAATCGTGAGAAGTTATTCTAAAATTATATTTGAGTTCTGCAGCATGTTCCAACCTACGTTAT  
TGCAGAGGAAATGACTGGGTTTGGAGCATCCCTGATGGAAGGTGTCCTAACATTTGCTCTAGTCTACACTGTTTA  
TGCTGCTGGGGACACCAGGCGTGGCACAATGGGAGCCATTGGACCCATAGCAATTGGGTCCATAGCCGGAGCCAA  
TGTGTTGGCAGCCGGGCCCTTCTCCGGCGGATCAATGAATCCGGCGTGCGCCTTTGGATCGGCTGTACCGCCGG  
CAGTTTCAAGAATCAAGCAGTTTACTGGGTTGGACCATTGATCGGTGCTGCAGCTGCAGGCCCTTGCTATGACAA  
TGTTGTGTTCCCTAGTTCTCAAGCACCAGGGAGTTGGGGTG**TAA**TTCTATGCGATATTTACATTTTCTTTTCT  
TTTGTTCATCAGATTTGTATTTTATTAAGCTGTTTAACTGAATTCCTGAATGACTAATGATTATTTAGATGATC  
TTTGCAATTCATTTTTTATCCTGTTTAAAGATATAAGACAAAGAAGAGTATAGAAAGGGGTGCATCCCCCTCAAAA  
ATTTTATAGATCTCTAAAAATATATACTGTATGAAGTAGACCCTTAAAAAATTAATTTCTTCCCTCTTTTTTATT  
TTTATTTTATTTATTTATTTATTTTATAAGTTTTCCTCCACACTCAAATTTCTGTTTCATTTGGACTTTCT  
AGAATTCGGGTAAAGAGTTGTGAACATTTCGACATATCATTATAATTATGATGTTAAATGAATAAAATGATAGCA  
ATGAACATTATCATGAATAGCTCTCTAGATGTCATCACCTGCCTTGTTTCAAAAACATGAATGAGCAATGTTTAT  
AAAATAAATGTTTATACAAATCATACAACCTGCATATGTAACAGTGAAAATTAGTTATTAGATCAGCATTTATTA  
AGAAAAAATCATATTTAACCCTAAGTTTTTAATTATCTGATTTGAATTTAGTTAGAGTTTATAATTTTAAGAA  
TATGATCCTTAAATTTTGCTTAGATTTTAAATAGGCCCTCTATCACTTTTTCGTCAAAATGAATGGTTTGTAC  
**>BpeTIP5;1**  
**AT**GGGTCCAACAATGGTAGCCGCGCTTTCCAACATTCTGTCACTCCTAATGCGCTTCGATCATATCTCGCGGAG  
TTTCTCTCCACATTCTTCTACGTCTTTGCGGTTGTGGGTTCTGCCATGTCATCGCGGAAATTGATGCCAGATGTT  
GCGTCGGATGCATCCAGTTTGGTCGTGGTTGCCATCACCAATGCCTTTGCATTGTCGGCAGCCGTGTATGTTGCA  
GCGAACATCTCCGGTGGGCATGTGAATCCGGCTGTCACATTTGGAATGGCGGTGCGAGGCCACATTAGTGTTCCA  
ACCGCTTTGTTTTACTGGCTTTTCGCAGATGCTGGCCTCTGTTATGGCTAGCCTTCTCTTGAAGATGACCGTTGTT  
GGACAGCATGTTTCCAACCTACGTTATTGCAGAGGAAATGACTGGGTTTGGAGCATCCCTGATGGAAGGTGTCCTA  
ACATTTGCTCTAGTCTACACTGTTTATGCTGCTGGGGACACCAGGCGTGGCACAATGGGAGCCATTGGACCCATA  
GCAATTGGGTCCATAGCCGGAGCCAATGTGTTGGCAGCCGGGCCCTTCTCCGGCGGATCAATGAATCCGGCGTGC  
GCCTTTGGATCGGCTGTACCGCCGGCAGTTTCAAGAATCAAGCAGTTTACTGGGTTGGACCATTGATCGGTGCT  
GCAGCTGCAGGCCTTGCTATGACAATGTTGTGTTCCCTAGTTCTCAAGCACCAGGGAGTTGGGGTG**TAA**  
**>BpeTIP5;1**  
MGPTMVAARFQHSVTPNALRSYLAEFLSTFFYVFAVVGSAAMSSRKLMPPDVASDASSLVVVAITNAFALSAAVYVA  
ANISGGHVNPAVTFGMAVGGHISVPTALFYWLSQMLASVMASLLLKMTVVVQHVPTVYVIAEEMTGFGASLMEGVL  
TFALVYTVYAAGDTRRGTMGAIGPIAIGSIAGANVLAAGPFSGGSMNPACAFGSAVTAGSFKNQAVYVWGPLIGA  
AAAGLVYDNNVFPSSQAPEGVGV\*

## XIP – Uncharacterized X intrinsic proteins (XIPs)

### BpeXIP2;1 (original version)

**>FXXK01001578.1**|:125258-129233 Betula pendula genome assembly, contig:  
Contig1577, whole genome shotgun sequence  
**>Bpev01.c1577.g0027.m0001**  
Bpe\_Chr3 19,966,597-19,968,432 (1) ::  
join(19966597..19966637,19966768..19966855,19967620..19968432)

### >BpeXIP2;1

CAATGGAAGTCCAATGAGGCATCTGTCCAACACAGATTTCCAAATACGACCACTAAAGCTACACTGAAAGAAGAG  
ATGATTTCTACTCTCTAGAGAGCCTCTGCAAAACACACATAGCACATCTCTTAAAAAGCCCCAACTAGCCATCCT  
CTCACCAGTAACAAGACGATTTTGGACAGCATACCATAGAATGAACGCCTGCTTAGGGACGTAGAGTGGGAACCA  
AATGAGCTTCCACCAAGGGACAACCGGTTTCTGTCTCTAATATAGTCCCAAGTTTCACTACAAAGATACTTACC  
AGTCTTAGAAATACTCTATCCAACCTAGTCAAGTTCACCCAACGGAACAAGGGAAAGCTGGCTTTGGATGCAAAC  
CAGTGTCTCTGACCTAGCAGGAGGCCAAATCCACTGGTTATCAAGAATAACAGAAGAGAGTTTGCATTAATATG

GCTGCCACTATCATATATGGGCCTAAACCCATATTTATCCTTAAGGACTCCATCCGGGTGCCACAGGTCAAGCCA  
AAGAAAAATTTTACTTCCATCCCCAACCGTGAATCGAATGAGGCCCTTGCAATCTCCTTGAGTTTATAGCAGTTT  
TCTCCATGTCCAAGAGCAATTTTGACGGATTTTACAGCCCCAAAACTCCTTCTTTGAGCACATAGGCTTCAAT  
CCAAGCAACCCATAAAGATCTTGATTTACAAAAAGGTTTCTTGCAATCTCCCTGATTTACAAAAAGGTTCCAT  
ATTATCTTTTGAGAATCTTCATAAAAAATAATAATAATAAAAAAAGAGCTTGAAGATAACATTATAGACCCAT  
GAGAGATTGTGGATCTTACCTAATTTCTAGAACTTCTGGTTCTCTCTCTCCAAAAAATCTAGCGCATGATTAAGC  
AGCTTTTCGCAACATGCCCTATTTAAACCATCCATAATAATTGGGTCATGATGATCGCAGCATGCCCTATTTAAAA  
TGTTACCTTTGTGGTCCAGTGGGTAGTGGCTACCATTCTTTCATGGGCCTCCCATATTCTGTATAAGATAATTAA  
GCTATTATTTTTTTTTATTTTTATTTTTCTGAGCAGATAATATATAAGCCCGATAGGTTGCTTGACATTGATGGACC  
ATCCCCCTATTTATTATACTCCCCAACCTATTGGGTCAATTAAACACTTCATCTAGATTGTCTGCTTTACTATGA  
TCAAGGGGCCACCGCACCTGTATTACAGTTGACATTAAACACTACACTTCTGTGTAAGCATTTAATTCAGAATG  
TCTTAATTTAGGGGTGGGGTGTAAATATGTAATATTTTTTTTGTCTTTTTTTTTTCAACAAAGGCTAATTTAAAGA  
TTAGTTAAGACTGACATGTTAATATTTTAAATAAATTGCAAAATAAAAAATATAATATATAACACTATTAAAAATTA  
ATTTTTAATAGTTATTAAATCTCATCACATCAACTTCAAAAAATATTTATAAGATATTTATGTCCATCTAACATT  
ACCCTTTTGAACAACTGCTCTGTGCGAGTTTGAAGTCTGAGAAAAGGTCTTTGTAGGAAGCAGTAGCCGAAAA  
TGTAGTTACAGAAAAGCAGTTAGAAAAAATAAAAGTTGACTAATATTATGATAGATATTATTATTATTATTATT  
ATTATTATTATTATTATTATATAGAAATACAAAGGGTAAGCAAGAGAGCTAAAGAAGTAGTTGGGAGTTCAGAG  
**ATGGCTCAGAATGTGCAGAGAGTGGAGGATGAAGAAAGCTTGTACGTTGGAAGTAGAGTCCAACCTGTCCCTTA**  
**ACGCCATCGCAAGTACCCACATTTTTCTTCAATTCCTTAATTAAGTTAGGGTGATACTATCATTCAAACTCATT**  
**CTTTTTCTAATAATATTGCAGGTGAGATCAACGTAGATTGAGGAAGGGAATCGCAATACTAGTAAACTGAGTGA**  
**GATTTTGGGCTTGGAGGAGTTCTTCTCCTTGAATGTTAGTATCATATTACATGCACCTTAATAATGCAATTATTAT**  
**TTTTGTTCTTTTGTGTTTGGAAAATGCATTTCATGGGAAATGGAGAGAACGGTATGTTTCATGGTTTAAATTA**  
**TTACATATTTAATTGTGTATATGTTGCGATGTTATTTAAAATTTTTAAATTATGTAGTCCATATACACTGTGAGA**  
**TACAACAAATTACAATTTAGAACATGAAATTGGGAGAATTACTTCGAGAGAGGAGAGAAAAGGAAATATGACAAT**  
**TAGAGTAGCCCTTAGATTTATTGATTGAAGATCTTTTTTCATTAATAACTCATAAAAGAGTGTTTAAATACTCC**  
**TATATTAATTACATTTAGGTTAAAAATACATAGATCTCCCTTGTGTCTTTAACATTACACTCTTTAGTCCATGT**  
**TTGAAAATTTTGTCAATATAACAAAAATAGACAATCTCATCTCATGATATTTGACTGAAAGTCACTTTTAAAGG**  
**GGAAAAGGAAAAAATCAAAATATAATATGCACAAAGAAAAGAGAAGGTACAAGTTTGAGACTTTTGGATCAAA**  
**GAAAATGTTTATGAAAATCTTATAATAATATAATTAGGATTAAACTAGGCATTTTAATTTATTTCTACGAGAAAA**  
**TTGTTAAGTTGGTTTGTGTTGATTGACATTGTAACAAATAAATTCATGTGGTATGCCTCCGTAACAAAAATGATA**  
**TTCTGTATAATTTGACCAATTTTCCAACATTATGTGATGAATCACAGGTTTGGCGAGCATCTTTGGCAGAGCTC**  
**CTTGCTACGGCAATCTTTGTTTTTGGCATTGACACCATAGTCATATCCTCCTTTGAAACTAAAACGGAATCACCA**  
**AAACTTATAATGTCACTCCTTATCGCTATCATTACCGCAATTCTCCTTCTCGCCGCAATCCGATTTCTGTTGGC**  
**CACATGAACCCTGCGATCACCTTAGCGGCCGCACTTGTGCGCTCATTTCCGTTTCGCGGGCAGCCGTATACATT**  
**TTGGCGCAATGTGCTGGTGTGTGCTAGGTGCACTAGCACTCAAAGCCGTGGTAAACAGCACCATTGAAGACACA**  
**TTTTCCCTTGGAGGCTGCACTCTCACTGTCAATTGCACCGGGACCAAATGGGCCGATTTCTGTTGGGCTTGGGACA**  
**AGCCAAGGCCTCTGGCTGGAGATAATATGTACATTTGTGCTTCTTTTTGCTTCAATATGGATAGCTCTTGATCAT**  
**CGCCAAGCCAGGGCTCTGGGCAGAGTTATCATTTTCTCTGTATCGGAATTGTAGTAGGCCTTCTTGTGTTTGTG**  
**TCAACGACGGTGACAGGAGCCAAAGGCTACGCCGGCGCCGGAATGAACCCAGCAAGGTGTTTGGGCCCAGCAATT**  
**GTTAGAGGGGGCCATCTCTGGAATGGGCACTGGGTGTTTTGGGCTGGGCCATCAATTGCCAGCGTGGCATTTTAT**  
**CTCTACACTAAGATAATTCCAAGTCAGCATTTCATGCCCCAAGGGTATAAACATGATTTCTTGAACATTTTGAAG**  
**GCTCCCTTTACATCAGACTCTGTTTACAAGAAGTGA**AAAAATGGACAGGTGCATGCCTTGAGAAAAATGTGTAAAT

T  
>BpeXIP2 ; 1

**ATGGCTCAGAATGTGCAGAGAGTGGAGGATGAAGAAAGCTTGTACGTTGGAAGTAGAGTCCAACCTGAAGGGAAT**  
**CGCAATACTAGTAAACTGAGTGAGATTTTGGGCTTGGAGGAGTTCTTCTCCTTGAATGTTTGGCGAGCATCTTTG**  
**GCAGAGCTCCTTGCTACGGCAATCTTTGTTTTTGCCATTGACACCATAGTCATATCCTCCTTTGAAACTAAAACG**  
**GAATCACCAAACTTATAATGTCACTCCTTATCGCTATCATTACCGCAATTCTCCTTCTCGCCGCAATCCGATT**  
**TCTGGTGGCCACATGAACCCTGCGATCACCTTAGCGGCCGCACTTGTGCGCTCATTTCCGTTTCGCGGGCAGCC**  
**GTATACATTTTGGCGCAATGTGCTGGTGTGTGCTAGGTGCACTAGCACTCAAAGCCGTGGTAAACAGCACCATT**  
**GAAGACACATTTTCCCTTGGAGGCTGCACTCTCACTGTCAATTGCACCGGGACCAAATGGGCCGATTTCTGTTGGG**  
**CTTGGGACAAGCCAAGGCCTCTGGCTGGAGATAATATGTACATTTGTGCTTCTTTTTGCTTCAATATGGATAGCT**  
**CTTGATCATCGCCAAGCCAGGGCTCTGGGCAGAGTTATCATTTTCTCTGTATCGGAATTGTAGTAGGCCCTTCTT**  
**GTGTTTGTGTCAACGACGGTGACAGGAGCCAAAGGCTACGCCGGCGCCGGAATGAACCCAGCAAGGTGTTTGGGC**  
**CCAGCAATTGTTAGAGGGGGCCATCTCTGGAATGGGCACTGGGTGTTTTGGGCTGGGCCATCAATTGCCAGCGTG**  
**GCATTTTATCTCTACACTAAGATAATTCCAAGTCAGCATTTCATGCCCCAAGGGTATAAACATGATTTCTTGAAC**  
**ATTTTGAAGGCTCCCTTTACATCAGACTCTGTTTACAAGAAGTGA**

>BpeXIP2 ; 1

MAQNVRVEDEESLYVGSRVQPEGNRNTSKLSEILGLEEFFSLNVWRASLAELLATAIFVFAIDTIVISSFETKT  
ESPKLIMSLLIAIITAILLLAANPISGGHMNPAITLAAALVGVISVSRAAVYILAQCAGAVLGALALKAVVNSTI  
EDTFSLGGCTLTVIAPGPNGPISVGLGTSQGLWLEIICTFVLLFASIWIALDHRQARALGRVIFSVIGIVVGLL  
VVFSTTVTGAKGYAGAGMNPARGCLGPAIVRGGHLWNHWHVFWAGPSIASVAFYLYTKIIPSQHFHAQGYKHDFLN  
ILKAPFTSDSVHKK\*

## BpeXIP1;1

>FXXK01001578.1:101348-103631 *Betula pendula* genome assembly, contig:

Contig1577, whole genome shotgun sequence

>Bpev01.c1577.g0026.m0001

Bpe\_Chr3 19,989,890-19,991,672 (1) ::

join(19989890..19990015,19990881..19991672)

## >BpeXIP1;1

TCCTTGTTTTATGTAAAATGAATATTCTTGCAAGCATATATTTGATCATAGTATGAATTGAAGTATTCTAAGACAG  
ACATGCATCCTTGTATGTAGAAATGAATATGCTTGCAAGATTGCAATTGACTTCCACGCCTCACTGCAGCCATTA  
AAAAAATCAATTGGATAAAGCGTATAACTCAATATATGCTTTCACCGTCTTCTGGGTAACGCCAGAAACGTGGC  
CACTTCAAAAAAAAAAATCTGTGCAAGCAGCCAAGTTTGGCGTTGGCTGGATTTTCCCATTTCTCTTCTATAAGT  
TTCCATGAAATTAGATTCTTTGAATTGGTGGTAATTCTCTTCACTTTCTCTACAATTATAAGGTCATGATATG  
GTTGTCCCCGGACAAGGCGATCAGGAATCTCCAACATCATTTGAGAAATGCGAAGCACAAAATTTTAGAACAAAA  
TTTCTTGTTCATAGGTGCCCATGAGTATTTCTCCCCAGAGGTATGCTTATTTATTTATTTATGTTTCAGATATAG  
TAGCTAGTTAGGTCTTCCCGTTCAATTTCTCACAAATACTATTCCAATTTGCTCATGGGCTATCGAGTTGTAAC  
AACAAAAAAAAAATTTGTAATAAAGTTGTTAAACATGATTTACCTCCCTTAATTTTATATATTTTATGTGGAACAA  
AAATAGATTTTAGAGAAATGATCTTTTTTACATCTCTTTTTTAAATCAACTATTGAATTTGTGAGTCATATGAATT  
CAAATATTAATTTAAAAATAGAGATGTACATGATACGTATAAGAGATTATGTGTAACATGCGTGTCTCTAGATTTT  
AGGAGAACTACACTTACCTCTTAAACTACTATCAAATTTGCAATAACCCCCAACTTCAAAGGTTGCAATGTA  
TATTACCAATAACTTAAGTTTTTTTGGTAGGGTACTTGTAACTTTTTTAAGTTTGGGTAGACATTATAAATTAG  
TTAGTAGTTTGAGGGAGGTAAGTGTAGTTTTCTTCTACTTTACTATTGGTCTAAAGATCATTCATTCAAATATA  
ATCTCTACAATTATATTTCTTATCTCTAATTGTTCCACTTATGTTATGCCAATACTTAAGTACTTGATGGAGAAA  
ATATATAGCAGCCTCTAAACAATCACAATATTTTTATTTACACCCCCAACTTTAAAAAGTGACATTAAAGCCC  
TTTGAACTACTACCGAATGTCAAATTAACATTTTTTGCATTTTTCTTCCCAAATACCTTTGAAGTTACTTAA  
AAAAAAAAAACAATTTAAAAAAGTTAAGGGGCTTAATATGAAAAGTGCTAACATTTTTTCATCTTGATTGTTT  
CTTTTCAGATGTGGAGGGGAGCCCTCACCGAGTTGGTAGCAACTGCCTTTCTTATGTTTACCCCTCATCTCTTCCAT  
CATCGCATGCTTGGACTCACAAGAGGTCGATCCCAAGCTTCTTGTCCCCCTCGCCGCTTCATTATAGCCTTCCT  
ATTCTCTTGGCCACAATTCCTTTATCTGGCGGCCACATGAACCCCATCTTGACATTCATAGCCTGCCTCAAGGG  
TCTCATAACTCTTGCCCGCGCTTCATCTACGTTTTTGGCACAATGTCTTGGCTCAATAATCGGTTTTTTTATAAT  
AAAAATGTGATGAACCACCAACAGGGCACAATATTTCTTAGGCGGATGCACAATATCTGCACTAAACCGAGG  
GACTGCATAGGTTTTTGAATTTTGTGTCACATTTGTGCTGCTGTTTGTGTTGGTGTGACGGTGGCGTTTGACAAGAA  
AAGGTGCAAGGAAGCTGGGCTAGCAGTGGTGTGCTGTGTTGGTGGCAGCGCCCTGGGCCTGGGCTGTGTTTGTGTC  
CATAACTGTTACTGGGCAGGTTGGTTATGCAGGTGTAGGCTTGAACCCCTGCAAGATGCTTGGGCCCTGCATTGTT  
GCATGGAGGGGTGTTGTGGGATGGGCATTGGGTTTTCTGGGTTGGCCCCCTTTTTTGGCTTGCATTGTTTATTATGG  
TTACTCTATGAGCTTGCTAAGGAGGGTTTTGGTAGAGGTAGAGGGGGAGTATGACATTTCCAGGTAGTTGGGGC  
TTGTTTTGGGGAAAATGGCAGTCCAACCTCTCTTGAAGGAAAATTTTAGGTAATGTGTTTGGTTTGGTCCAATTT  
CAATAGATCATGCAGTTACCATGTGAAATGATTAGGGGTGTAATGTGTATGCGGTTACAGTATTGGCAATATTT  
GCATCCGCATAATATAGTTATTAATTTTAAAGTATCCGCATCCGAATCATGTAATTATTATCTACATCCACACAAT  
TATTATCTGCTATTTCGCATATGAGGTGATAAGCCTTTTTTAAACCTTTAAGTTGTAATTCTTGCTCTTAATAAATA  
CAAAAATGCATTTTAGTTTTTTTTTTTTTAAATTAATAATCAATGCAATAGCCAGAGATAAGTACTTGATATTGTC  
GATAGGTTCCATTTCTTTCTATATTGCGAGTGATAAACTAAATTTATGGTCTAGACGTGTTTTCTTTTTTAGT  
AGTAAATCTGCAAATTGTATGAACAATACGGACAAAATGTACATAAAGATATTTTGGGAGGAATAAATAATTCT  
TACAAGATGTCTAAAGCAAACATAACGTAAAAATTTTATATTTCTAGAAATCTTATCAGATTCCATAATTGTTAG  
AGTAATATTCTGGTGGTTTTCTCCATGGGTCAACGATTTTAATAGTCACTGTACGGTTGGACTGAGGGGATGAA  
ATACTTGC

## >BpeXIP1;1

ATGATATGGTTGTCCCCGGACAAGGCGATCAGGAATCTCCAACATCATTTGAGAAATGCGAAGCACAAAATTTT  
AGAACAAAATTTCTTGTTCATAGGTGCCCATGAGTATTTCTCCCCAGAGATGTGGAGGGGAGCCCTCACCGAG  
TTGGTAGCAACTGCCTTTCTTATGTTTACCCCTCATCTCTTCCATCATCGCATGCTTGGACTCACAAGAGGTGCGAT  
CCCAAGCTTCTTGTCCCCCTCGCCGTCTTCATTATAGCCTTCCTATTCTCTTGGCCACAATTCCTTTATCTGGC  
GGCCACATGAACCCCATCTTGACATTCATAGCCTGCCTCAAGGGTCTCATAACTCTTGCCCGCGCTTCCATCTAC  
GTTTTTGGCACAATGTCTTGGCTCAATAATCGGTTTTTTTTTATAATAAAAAATGTGATGAACCACCAACAGGGCAC  
AACTATTTCTTAGGCGGATGCACAATATCTGCACTAAACCGAGGGACTGCATTGGTTTTTGAATTTTGTGTCACA  
TTTGTGCTGCTGTTTGTGTTGGTGTGACGGTGGCGTTTGCAGAAAAGGTGCAAGGAACCTGGGCTAGCAGTGGTG  
TGTGCTGTGGTGGCAGCGGCCTGGGCACTGGCTGTGTTTGTGTCCATAACTGTTACTGGGCAGGTTGGTTATGCA  
GGTGTAGGCTGAACCCGTGCAAGATGCTTGGGCCCTGCATTGTTGCATGGAGGGGTGTTGTGGGATGGGCATTGG  
GTTTTCTGGGTTGGCCCTTTTTTGGCTTGCATTGTTTATTATGTTTACTCTATGAGCTTGCCCTAAGGAGGGTTTG  
GTAGAGGTAGAGGGGGAGTATGACATTTCCAGGTTAGTTGGGGCTTGTTTTTGGGGAAAATGGCAGTCCAACCTCT  
CTTGAAGGAAAATTTTAG

**>BpeXIP1;1**

MDMVVPGQGDQESPTSFEKCEAQNFRTKFLVLSIGAHEYFSPSEMWRGALTELVATAFLMFTLISSIIACLDSQEVD  
PKLLVPLAVFIIAFLFLLATIPLSGGHMNPILTFIACLKGLITLARASIYVLAQCLGSIIGFFIIKNVMNHQQTGH  
NYFLGGCTISALNRGTALVLEFCCTFVLLFVGVTVAFDKKRKELGLAVVCAVVAWAALAVFVSITVTGQVGYA  
GVGLNPARCLGPALLHGGVLWDGHVFWVGPFLACIVYYGYSSMSLPKEGLVEVEGEYDISRLVGACFGENGSPST  
LEGKF\*

**BpeXIP1;2**

>FXXK01001578.1|:129871-134095 *Betula pendula* genome assembly, contig:  
Contig1577, whole genome shotgun sequence

>Bpev01.c1577.g0028.m0001

Bpe\_Chr3, 19961773..19962564) Genomic Location: 19961773-19962564

**>BpeXIP1;2**

TTTGTTTATGAAAAATACAAAGTAATTAACAGTAGATATACAAATACATAATTTAAACACAGAAATTTAAACA  
CATAAATAATTTGGAGAACGAAC TAACCGGACCGGTACCGGTTTTGTTTTTAAATAATGAGTTAAAAATTCGGTTTT  
TTGCTTAAAGTTATGGGTTACGCCACGTGTGCAATTCTAGGCACCTTTGAATTGCTTAAAAATTTATGGGTTCA  
CGCCACGTGTGCAATTTTAGGCACCTTTGATGTGTGATTGAGCTATTATATATATATAGATTTCCCTTATTCAATT  
AAAAAATAAATAATAATACTTCAACCCTAACCTCATTAAATTTTCAACCCTAACCCATTATGTTGAATTTAT  
GAATCTTATCAAAAAATTTGTTAGCCGTACTCCCTCCTATCTTTCAATCTTTAATTTTGGCACAATTATACGGAAA  
TGAACCACGTACGTAAGAAGTTCCATCTGATAGTCTTTGGAATAAAGTCACAATCAAACTTTATATAGGAGCAT  
TAAAGGAATCTTAACCATTCCATTTTATACAAGAGGTTATCATGCACACAAGGAGTTTTAAGATAATTTTTGTAT  
TCAAGCATCAATTTGATATAAACATAAACCTCAAAAACTAATTTAATAATCTTCCCTTCATATTGTTGTAATATT  
TACGATATCAAGGTGCAGCAGTGTAGATATTTGGCCTCACATTTGGTTATTAGTAAGTGCATTAATTTATTTAAT  
CCTTGTTTTATGTAAATGAATATTCTTGCAAGCATATATTTGATCATAGTATGAATTGAAGTATTCTAAGACAGA  
CATCCTAGCTTGTATGTAGAATGAATATGCTTGCAAATTGCAATAGACTTCCACGCCCTCATTCCAGCCATTAA  
AAACATCAATTTGGATAAAGCGTATAACTCAATATATGCTTTCAACGTCTTCTGGGTAACATCACGGCCACTTCAA  
AAAAAAAAAATTTCTGTGCGAGCAGCCAAGTTTGGTGTGGCTGGATTTTTCCCATTGTCTTCTATAAGTTCCCA  
TGAAATTAGATTTTTTGAATTGGTGGTAATTTCTTCTCACTTTCTTTACAACCTATAAGGTCATGATATTGTTGT  
CCCCGGACAAGGCGATCAGGAATTTCCAACATCATTTGAGAAATGCGAAGCACAAAATTTTAGCACAAAATTTCT  
TGTTTCCGTAGGTGCCATGAGTATTTCTCCCCAGAGTATGCTTATTTTATTTATTTGTTGTTTCAGATATAGTAGTT  
AGGTCCTTCCCGTTCAATTTCTAACAATATTATTGCAATTTGCTCATGCGCTATCGAGTTGTAAAAA  
AATAGTAATAAAGTTGTTAAACATGATTTACCTCCCTTAATTTTATATATTTTATGTGGAATGGAAATAAATTTT  
AGAGAAATGATATTTTTACATCTCTTTTTTAAATTAACATTGAATTTGTGAGTCATATGAATTCATAAATTGAT  
TTAAATAGAGATGTATAAGAAATTATGTGTAACATGCGTGTCTCTAGATTTTAGGAGAACTACACTTACCTCT  
CAAATTACCATCAAATTTGCAATAACCTCATACTTCAAAGGTTGCAATGTATACTACAAATAACTTAATTTTT  
TTTTTCTTCGTTAGTATTATTCTAATGGAGGGATAACTAAAGGGTTTGGTCGATTGGTAGGGTACATTGTAAC  
TTTTTAAGTTTGGATGGACATTATAAATTAGCTAGTAGTTTGAAGGAGGTAAGTGTAGTTTCTCTCTACTTTAC  
TATTGGTCCAAAGATCATTCAATCAATATAATCTCTACAATTATATTTCTTATCTCTAATTGTTTTACTTATGT  
TATGCCAATACTTAACCTGATGGAGAAAATATATAGCAACCTCCTAAACAACCACAACATTTTTATATACAT  
TCCCAAATTTAAAAAGTAACATCGAGGCCCTCTGAACCTACTACCAAATGTCAAATTAACATTTTTTGCATTTT  
TCTTCCCAAATACGTACCTTTGAAGTTACTAAAAAACAATTTCAAAAAAATTAAGGGGCTTAATATGAA  
AAGGGCTAACATGTTTTGATCTTGATTGTTTCTTTCAGATGTGGAGGGCAGCCCTCACCGAGTTGATAGCAACTG  
CCTTTCTTATGTTTACCCTCACATCTTCCATCATCGCATGCTTGGACTCACACGAGGTCAATCCCAAGCTTCTTG  
TCCCCCTCGCCGTCTTCATTATAGCCTTCCATTCTCATGGCCACAGCTCCTTTATCTGGCGGCCACATGAGCC  
CGATCTTACATTTATAGCCTGCCTCAAGGGTCTCATAACTCTTGCCCGCGCTTCCATCTACGTCTTGGCGCAAT  
GTCTTGGCTCAATCATCGTTTTTTTTTATAATAAAAAATGTGATGAACCACCAAATAGGGCACAAGTATTTCTTAG  
GCGGATGCACAATATCTGCACTAAGCCGAGGGACTGCATTGGTTTTTGAATTTTGTGACATTTGTGGTGCTGT  
TTGTTGGTGTGACGGTGGCGTTTGACAAGAAAAGGTGCAAGGAACCTGGGTTAGCAGTGGTGTGCGTTGTGGTGG  
CAGGGGCCATGGCATTGGCTGTGTTTGTGTCCATAACTGTTACTGGGCAGGCTAGTTATGCAGGTGTAGGCTTGA  
ACCCTGCAAGGTGCTTGGGCCCTGTGTTGTTGCAAGGAGGGGTGTTGTGGGATGGGCATTGGGTTTTATGGGTTG  
GCCCCTTTTTGGCTTGCAATTGTTTATTATGGTTACTCTATGAACTTGCCCTAAGGAGGGTTTGGTAGGGGTAGAGG  
GGGAGTATGACATTTCCAAGTTAGTTGGGGCTTGTTTTGGGGAAAAATGGCAGTCCAACCTTCTCTTGAAAGAAAA  
TTTAGGTAATGTGTTTTGGTTTTGCTCCAATTTCAATATATCATGCAGTTACCATGTCAAATGACTAGGGGTGTATA  
TGTGGATGCGGTTGCAGTTATTAGCAATATTTGCATCCGCATAATGTAGTTATTAATTTTAGATATTCGCATCCG  
AATTATGTAATTATTATTGTCATCCACGCGTTATTATAGTTATAATCTGCTATCCGCATATGAGGTGATAAGCC  
TTTTAGACCTTTAAGTTGTAATTCAGCTTCTAATAAATAAAAAAGGCATTATAGTTTTTTTTTTTAGT  
AAATACTCAATGCAATAGCCAGAGATAAGTACTTGATATTGTCCATAGGTTCCATTTCTTTCTATATTGCGAGTG  
ATAAACTAAATTTATGGTCTAGACGTGTTTTTTTTTTTTTGTAGTAGTAAAAATGTGCAAAATGTATGAACAATA  
TGGACAAAATGTACATAAAGATATTTTGGGAGGAATAAATAATTCTTACAGGATGCCTACAAGCAAACTAAACAT  
AAAAATTTTATATTTCTAGAAATCTTATCAGATTCTTAATTTGTTGAAGCAATATTCTGATTGTTTTTCTCCGTTG

```
GTCAACAATCTTAATAGTTATTGTACGGTTGGACTGAAGAGATGAAATACCTGCAAAACAAAAAGATTGTCACAA
AGTTTTTAACTGGAGCCGAAGACACTCCAATGATTAAGTCAATACAGTTCATATTTGGAGTGTAAGAATGGCTTG
GTTATGGAGTGAACAAGCCCGTGTGTTAGAGAACATAAGAAAGAGAGAGAGAGAGAGAGAAGGAAAGCTCT
>BpeXIP1;2
ATGGATATTGTTGTCCCCGGACAAGGCGATCAGGAATTTCCAACATCATTTGAGAAATGCGAAGCACAAAATTTT
AGCACAAAATTTCTTGTTCCTGTTCCGTAGGTGCCCATGAGTATTTCTCCCCAGAGATGTGGAGGGCAGCCCTCACCGAG
TTGATAGCAACTGCCTTTCTTATGTTACCCCTCACATCTTCCATCATCGCATGCTTGGACTCACACGAGGTCAAT
CCCAAGCTTCTTGTCCCCCTCGCCGTCTTCATTATAGCCTTCCCTATTCCCTCATGGCCACAGCTCCTTTATCTGGC
GGCCACATGAGCCCGATCTTCACATTTATAGCCTGCCTCAAGGGTCTCATAACTCTTGCCCGCGCTTCCATCTAC
GTCTTGGCGCAATGTCTTGGCTCAATCATCGGTTTTTTTTTATAATAAAAAATGTGATGAACCACCAAAATAGGGCAC
AAGTATTTCTTAGGCGGATGCACAATATCTGCTAAGCCGAGGGACTGCATTGGTTTTGGAATTTTGTGTCACA
TTTGTGGTGCTGTTTGTGGTGTGACGGTGGCGTTTGACAAGAAAAGGTGCAAGGAACCTGGGTTAGCAGTGGTG
TGCCTTGTGGTGGCAGGGGCCATGGCATTGGCTGTGTTTGTGTCCATAACTGTTACTGGGCAGGCTAGTTATGCA
GGTGTAGGCTTGAACCCTGCAAGGTGCTTGGGCCCTGTGTTGTTGCAAGGAGGGGTGTTGTGGGATGGGCATTGG
GTTTTATGGGTTGGCCCTTTTTTGGCTTGCATTGTTTATTATGGTTACTCTATGAACTTGCCTAAGGAGGGTTTG
GTAGGGGTAGAGGGGAGTATGACATTTCCAAGTTAGTTGGGGCTTGTTTTGGGGAAAAATGGCAGTCCAACTTCT
CTTGAAAGAAAATTTTAG
```

>BpeXIP1;2

MDIVVPGQGDQEFPTSFEKCEAQNFSTKFLVSVGAHEYFSPERMWRAALTELIATAFLMFTLTSSIIACLDSEVEN  
PKLLVPLAVFIIAFLFLMATAPLSGGHMSPIFTFIACLKGLITLARASIYVLAQCLGSIIGFFIIKNVMNHQIGH  
KYFLGGCTISALSRGTALVLEFCCTFVVLVVGVTVAFDKKRCKELGLAVVCVVVAGAMALAVFVSITVTGQASYA  
GVGLNPARCLGPVLLQGGVLWDGHWVLWVGPFLACIVYYGYSMNLPKEGLVGVEGEYDISKLVGACFGENGSPTS  
LERKF\*

### BpeXIP2-like (original version)

>FXXK01002938.1:21257-23881 Betula pendula genome assembly, contig:  
Contig2937, whole genome shotgun sequence  
>Bpev01.c1577.g0027.m0001

### >BpeXIP2-like

```
TCTCTTGAAGCTGGTTCATATGTAGGGCCGTTTCAATCTAATGATTCACATATTTTCTCATAATTTTTTATATCC
TCACTTCAAATTCACAAATATTGTTCATTACCATTTGTTAAGAGTATTTTTTTTGTAAAAATATATTATTTCAA
TCAAATCCCAAACACTCCATCTTCTCATCTTTATTTTTATCTATCAACACTTATAGTTTATAGTTTCTCTTTGT
TTTTGACTTTTAAATAGGCTCTAAATTTATGCCGCTTTCAAATGTTTGTATTAGAATACACTCATATAAAATACTGT
TAAACATTTTTTTCAGCTTTGGATCATAATAATCATATATTCAAAGATGCAACATTCCCGGTGTGTTCCCTATAT
ATATACCGTCTCCAAACGAGGTATCTTGTATCATAATACCTCATCTGATGATGGACCAAGCCTTCATAAGTTTCA
CTTCTTGTGAAGATTTCGTATTATACCCAAAATACAACCTCCTCCTGAGGGATAAACAGCTAGAAATGCGTGAATT
AAAAATCACACCATCATCACAACCTTATCCTGACATGGTCTTTTGATTTCTAGATGGTGAAATCTCATGCTTGGTC
GACCTTGGTTCTGGTGTGAGATAGGCAAGTTTTGTTGACCAGACAAGTGATGGTGAAGAGATACTCAGTGGAAC
AACGGCTTGTGGTGTAAAGATTGATATCTACATATCAAGATAGTAATTATCGGACTTGACTTGTATGTCTATT
GTGATACATTAAAGGTATTATGCGAATGGGTTAAGATTATTTAAGTATGTAATATTTGGAGTTGGACTACGGCA
ATCAAAAATGAGGTAGCAAGCCATTATTAGAGATTGCATAAAATAGAACTGAATATCATTGATTGGGAGTTTCA
AGCATGATGCAGACTCACAGAAATGGTCGCATCCGCAGGAGAGTATTGAGTGAAAGACATGGAGCGCTATGATAA
TATGACGTGTGAACTGAATAAGTGAATCGCCTACCACCTATAGTCCACTCAACGCCAGCGAAAGTGTGCGCATT
CTGGAGTTGTCAATAACCGGGTCAGACCATGTGGAACGTATAAGGGCTCTCTCGTTTTTTATTTTTTAAATACTA
GCAAAATTGGGGGAGGGTAGGATTTTTTTATCTCGTTGAAGTGTTGCAATTTCTTTCTATTTTTCTTATACTTTTCT
TAAATTTGTAAATTGCTTTATTTGACGCCAGAAATTACGAATCCTATACAACGTAAAAAGATTTCAGAGGAAGGGAAT
CAGCAAGTTTTTAAATACTAAGTACAACCTGAGAGTGTTTGTATGAAGCGGCTTGGAGGAGATTTTATGTTTCTCAC
GATGAAATGTTAGTATCTATACTATGAAATTACGAGCATACTAACATAAATCTCTGACATATTTATTTATTTATT
TCTTCCATTAATTTGTGTATTTGAGGAAATGAATTTCTAGGAAAGGCTTAGTGAGCGAAGAAATGTTTCTCTATT
TGGGCAGGTCTGGACAAACAAAAAGTTTATGTAACAAATCTGTGTATCAGGCAGTAATATAATTGCGGACGGTAT
GAGTTCATAAAATTCTGTATAAAGATGATGTTGACTCTGTGGATTCAACATGGCTCGTACTGCGTATGATGGGGA
TGCCAAATATTAGAGATTATGTATCACCGAAATAAAATTGTAAATTTGTATTTTTTGTGTTGTGGAGGAGAGTGATA
GATAAATTGTGTATACAATTAGATAGAGTCCCTTTTATTTATATTGAATTGAAGATCTATTTTTATCATTATATT
ACTCACAAAGTATGAGTGAGTTATATATATCATTAACCTATTTACCAGAACTGTGTGGGAATTTAATTGACTTTA
AATTGAATCTTCGCTTTTCTTTGTTAAACAATAAGAAAGTGAATAAAGGTTGCGTGATGCAGCCACCTGAGG
CATTACGGGCTCATGATCGTATCGCCCATCCTTCTCTGGAGTGAATTCGCAAAATGCATCGGACAGGCTCCT
TCATGTGAGTGGTATTGGGTCTCTCGGCTTTTCACTGGTACCCACTGTGCGGCGGTGTCTCTCACGCGCCGGTGA
GTGGTCCATTTGCACCGGCCACTTTTCTCCGCCAGCCCTCCGCCGTTGTTTGTGTTTACTGTTTTTTTTAAATTT
TCCTTGTAATTTGATGTTGTTGTGTAATTTGCTGTTGTTGTGTTGCTCAGACTCTCGGTCTGGGTTGAAACCCCC
TTTTTAATTTTTTCTCTTTATTTTGTTCAGTTTCTCCTCCGAAGCTGGATGAGATTAAAGTTTTTTAGTCTCTGCTG
```

GTTTCTTAGGAAGTCAGATTAGATCTAAGGTCTTAGGAGTTTTTCGAACTCCCGATGGTTTTATCCATCAGATTGC  
GCCGCGCCTTCAAAGCTGCATTTCGAGATTACTTTCTCCTCCTTGGGTTTTTCCCTTATTGTGAAGGTGCTA  
GTGGTTTGTCTGATTAGGATTTTTTCAGTTGAGCAACGTCTTGGTAGTTCTTGGCTTTTAATTTCTTGTAAGGTTT  
TAGCCTTATGTTTCTGTAATGGTTCCCTTTAATATATGTGATGATGCACCTTACAAAAAAAAAAAAAAAAAGAAAA  
TTTTGTGATATAACATAAATAGACAATCCCATCCTCATGATATTTGACTGAAAGTCACTTTTAAAGGGGAAAAA  
AGAAAATCAAAATATAATATGCACAAAGAAAATAGAAGGTACAAGTTTGAGACTTTTGGATCAAAGAAAATGTTT  
ATAAAAATCTTATAATTATATAATTAGGGTTAAGCTAGGCATTTTAATTTATTCTATGAGAAAAATTGTTAAATT  
GGTTTGGTTTGATTTCGACATTGTAACAAATAAATTCATGTGGTATGCCTCCGTAACAAAATGATAATTCTGTATAA  
TTTTGGCCATTTTTTTTGACATTATGTAATGAATCACAGGTTTGGCGAGCATCTTTGGCAGAGCTCCTTGCTACGG  
CAATCTTTGTTTTTGTGCTTGACACCATAGTCATATCCTCCTTTGAAACTAAAAATGGAATCACCAAAACTTATAA  
TGTCACCTCCTTATCGCTATCATTACCGCAATTCTCCTCCTCGCCGAATCCGGTTTCTGGCGGCCACATCAACC  
CCGTGATCACCTTAGTGGCTGCACTCGTCGGCCTCATTTCCGTTTACGGGCAGCTGTATACATTTTGGCTCAAT  
GTGCTGGTGTCTGTGCTAGGTGCACTAGCACTCAAAGCCGTGGTAAACAACACCATTGAAGACACATTTTCCCTTG  
GAGGTTGCACTCTCACTGTCAATTGCACCGGGACCAAATGGGCCGATTTCTGTTGGGCTTGGGACAAGCCAAGGCC  
TCTGGCTGGAGATAATATGTACATTTGTGCTTCTTTTTGCTTCAGTATGGATAGCTCTTGATCATCGCCAAGCCA  
GGGCTCTGGGCAAAGTTATCATTTTTCTCTGTATCGGAATTGTAGTAGGCCTCCTTGTGTTTGTGTCAACGACGG  
TGACAGGAGCCAAAGGCTACGCCGGCGCCGAATGAACCCAGCAAGGTGTTTGGGCCAGCAATTGTTAGAGGGG  
GCCACCTCTGGAATGGGCACTGGGTGTTTTGGGCTGGGCCATCAATTGCCAGCGTGGCATTATCTCTACACTA  
AGATAATTCCAAGTCAGCATTTCCATGCCCAAGGGTATAAACATGATTTCTGAACATTTTGAAGGCTCCCTTCA  
CATCAGACTCTGTTTACAAGAAGTGA

#### >BpeXIP2-like

GTTTGGCGAGCATCTTTGGCAGAGCTCCTTGCTACGGCAATCTTTGTTTTTGTGCTTGACACCATAGTCATATCC  
TCCTTTTGAACATAAAATGGAATCACCAAAACTTATAATGTCACTCCTTATCGCTATCATTACCGCAATTCTCCTC  
CTCGCCGCAATCCGGTTTCTGGCGGCCACATCAACCCCGTGATCACCTTAGTGGCTGCACTCGTCGGCCTCAT  
TCCGTTTACGGGCAGCTGTATACATTTTGGCTCAATGTGCTGGTGTGCTAGGTGCACTAGCACTCAAAGCC  
GTGGTAAACAACACCATTGAAGACACATTTTCCCTTGGAGGTTGCACTCTCACTGTCAATTGCACCGGGACCAAAT  
GGGCCGATTTCTGTTGGGCTTGGGACAAGCCAAGGCCTCTGGCTGGAGATAATATGTACATTTGTGCTTCTTTTT  
GCTTCAGTATGGATAGCTCTTGATCATCGCCAAGCCAGGGCTCTGGGCAAAGTTATCATTTTCTCTGTATCGGA  
ATTGTAGTAGGCCTCCTTGTGTTTGTGTCAACGACGGTGACAGGAGCCAAAGGCTACGCCGGCGCCGGAATGAAC  
CCAGCAAGGTGTTTGGGCCAGCAATTGTTAGAGGGGGCCACCTCTGGAATGGGCACTGGGTGTTTTGGGCTGGG  
CCATCAATTGCCAGCGTGGCATTATCTCTACACTAAGATAATTCCAAGTCAGCATTTCCATGCCCAAGGGTAT  
AAACATGATTTCTGAACATTTTGAAGGCTCCCTTACATCAGACTCTGTTTACAAGAAGTGA

#### >BpeXIP2-like

VVRASLAELLATAIFVVDIVISSFETKMESPKLIMSLIIAIIITAILLLAANPVSOGHINPVITLVAALVGLI  
SVSRAAVYILAQCAGAVLGLALAKAVVNTIEDTFLSGGCTLTVIAPGPNGPISVGLGTSQGLWLEICTFVLLF  
ASVWIALDHRQARALGVIIIFSVIGIVVGLLVFVSTTVTGAKGYAGAGMNPARGPAIVRGHLLWNHWFVWAG  
PSIASVAFYLYTKIIPSQHFHAQGYKHDFLNILKAPFTSDSVHKK\*

### BpeXIP1;3

>FXXK01002938.1:28824-31870 Betula pendula genome assembly, contig:

Contig2937, whole genome shotgun sequence

>Bpev01.c2937.g0004.m0001

Contig2937 27,828-30,813 (1) :: join(27828..27953,30022..30813)

#### >BpeXIP1;3

ATTTGATCACAGTATGAATATTTGTTCTAAGATAACCATCCTTGCTTATTTTCGTCATTAGAAAAATGATCAGTTGG  
ATAAGCATATTACTCAATATATGCTTTTCACTTAAACAAAAATATATATATGCTTTCACTGTCTTCTGGGTA  
ACGCTAGAAACATCATTGACACTTCCAAAAACATCAGTGAAGCAGCCAAGTTTGGCGCGGCAGTATTTCTTCT  
TATAAGTTTCAATAGAAAATTCTATAAGAGTCTAATTAATAGGTTTTTTTACTATTAATATCACCCGACAACAGCC  
AGAATGCTCTCAATATTGGTAGTACTCATGGTCAAAATTTTAATTTTAAATTTTTTTTTTTTTTAAAAAAATGAC  
CCACGACTGGGTACGATAGAACAGACCCACAGCGGCATGCCCTCTCACTACAGCTAGCTAGATGCACCATTTCTC  
CCCAATTATTGTACGTAGACATTGCTAGCCTCTTTCCACCATATCTTACTTAGGCCGCTGATTACACTGAACCC

AACTTCATAAAGAACATACTCCACGTACGAATGCTAGAAAAGTTGGATCGATCTAAGGCTTTGGGGGCATAAACC  
GTTTGGCTTGTGGGACAATTCTCAACAGTATATGCATGTGATGTCAGGATTTTAAAGACTTTTAAAGGAAAAATG  
CATATGTGCTTTCCATTGTAATTAATATGCGTTTGAATTTATCCCAAGTCCAACAACCTTGAGAGAAAAGTTGATGC  
GGTGGTATAAAAAACAGCGGAGCATCCTAAAAACCAACATATACATCAGCCTAGTGGGATTCCATCATATAGACAA  
CGAAATTCTCCTCAGATTCTAACATCAAAATTATAGTAATAAAGTTGCTCAAGCTGGAGCTGTCTTTTTTCGCCCC  
CATATTTCTAGAAGTAATTAATATGTTGCCAGCCCCCTCTTTATGTTACGTGTCAGGTTTGGATTGTATTAATAAT  
ATATATATGTTAACTATAATCCAATTAATTTAATTAATGAGGTCAAATCTCTCAACTCTAATCCGTTAATTTTGT  
ATTGAATTCATGTTGTGTAAAAAATTGTCAACCTAAATATCACGTGTCAGGTTTGGGTCGTGTTGAGACATATA  
TATAACATTATATAGATCGATTAATCTTAACCCATTTTCATTTAATTAACAGATCAGATCCCTTTAACCATAACTC  
ATTAATTTTATGTTGAGTTTATGAATCTTATCAAAAAATTGTTAGCCGTAGTACTCCCTGGCCTCCTATATATCT  
TTCAATCTTTTTTGGCACAATTCTACGGAAATGAACCACGTACGTAAGAAGTTCCATCTAATAGTCTATATATGGA  
ATAAAGTCACAATCAAACCTTTATATAGGAGCATTTAAAGGAATCTTAACCATTCCATTTTATACAAGAGGTTATC  
ATGCACAAGGAGTTTTTAAGATAATTTTTGTATTCAAGCATCAAATTGATATAAACGTAAACCTCAGAACTAATT  
TAATAATCTTCCCTTCATATTGTTGTAATATTTACGATATCAAGGTGCAGCAGTGTAGATATTTGGCCTCACATT  
TGGTTATTAGTAAGTGCATTAATTTATTTAATCCTTGTTTATGTAAAATGAATATTCTTGCAAGCATATATTTGA  
TCATAGTATGAATTGAAGTATTCTAAGACAGACATCCTAGCTTGTTTATGTAGAATGAATATGCTTGCAAAATTGC  
AATAGACTTCCACGCCTCATTGCAGCCATTAATAAATCAATTGGATAAAGCGTATAACTCAATATATATGCTTTC  
AACGTCTTCTGGGTAACGCCAGAAACATCACGGCCACTTCAAAAAAATTTCTGTGCGAGCAGCCAAGTTTGGTG  
TTGGCTGGATTCTTTCCCATCTCTTCTATAGTTTCCATGAAATTAGATTCTTTGAATTGGTGTTAATCTCTCTC  
ACTTTCTTACAACCTTATAAGGTCATGGATATTGTTGTCCCGGACAAGGCGATCAGGAATTTCCAACATCATT  
GAGAAATGCGAAGCACAAAATTTTAGAACAAAATTTCTTGTTTCCGTAGGTGCCCATGAGTATTTCTCCCCAGAG  
GTATGCTTATTTATTTATTTGTGTTTCAGATATAGTAGTTAGGTCTTCCCGTTCAATTTCTCACAAAATACTATTCC  
AATTTGCTCATGGGCTATCGAGTTGTAAAAAAGAGATTAGTAATAAAGTTGTTAAACATGATTTGCCTCCCTT  
AATTTTATACATTCTATGTGGAACAGAAATAGATTTTAGAGAAATGATCTTTTACATCTCTTTTTTAAATCAAC  
CATTAGATTTATGAGTCATACGAATTCATAATTGATTTAAAATAGAGATGTACATGAGATGTATAAGAGATTAT  
GTAACATGCGTGTCTCTAGATTTTAGGAGAACTACATTTACCTCTCAAACCTACCATCAAATTTACAATAACCTC  
CAAACCTTCAAAGGTTGCAAGGTATACTACCAATAACTTAAGTTTTTTTTTCCCTTTGTTGGTATTATTTCTAATG  
GAGGGATTGTTGCCTAGATAATCAATCCTAGAGAGAAAGGAGGGGGGGGGTGGATAGGGTTGATAACAAACTTT  
TTTTTTAATAAAAAATTATATTGAATTAAGAATTTAGAATAATATAAGAAACAGTATAATGCAGAAAAATATAAATA  
TGAACACAATAATAAAAAAGATAGGAAGAGATTCAAACCTCTGTGATTTATCGCGATTGTTGCTACATGACCTACGT  
CCACTCCCCAAGCACCACCTTGAGATTTCAATCCACTAATCCAAACCTCCTTGCAAGGTAGAGTTCAAACCTTTAC  
ACACTAAGAGTACACCACCTTCTTCAAGGTGAAAAATCTCCTTACATCCTCACAAGGGTCACACCACCCCTC  
TTGACACAAATTAAGTGTGGATAGAATTTGAGATTTCTTTTCACAATGACAATTTCTCCTTTGAAAAACGATATACA  
AATGAAGCTTTTACAATAATATCTCTCACTAGAACTTTTGTATGAATTGAACCTGAAGGGCTCAAAAAAATTTGA  
ATAGATGAAAAGAAAGAATGCTTTGTGTTCTAAGCTTGTTTGTCTCACTTGATTGATTGTAAGAAAATGAGAGC  
TAAGGTTACGTATTTATAAGTCTAGCAAGAATATAACCGTTGGAGAGAAAGTTAAATTTTTAAAGTTGCAATCTC  
ATTTTCAAATCAGAAATTGTTGCTAGCTAATTTTTTAAAGTTACAATCAGATTTTTAAAGCCAGAAATTGTTAC  
TAGCTGATTTTTTCAAAGTTGCAATCAGATTTTTCAGATATAATAATTATTGCTAGCATATTTTTCAAAGAAACCTA  
AGTCCAATGCATTTTCGTATTTTAAAACTCATGTATGAAATGTATGAAGGGTCCTAAGGTCAATCTAGAGTAAG  
GAGCCTCAAGAGTTAATCATATAGGAGTTTACAAGAATACCTTAATAAAAAATAATATTCTTTAATCTTGAGTT  
CTTTTGTACTTAAGGACTTCTTGCTTTGAATTCTAAATGCCTTTGATTTTTTTGGTCCCTTGAGGATGTATGCTT  
GAATGTTTCTTGCAACTATCATACTTGAATTAAATCCATTAGAACAACAAGATAGAATTTGTTATCATAAAAAAT  
ATTTGCAACATAAATTGGATTGACGCCATAGGGCTAACAGGGATAACTAAAAGGGTTTGGTCGATTGGTAGGGTAC  
ATTGTAACTTTTTTAAATTTGGATGAATATTATAAATTAGCTAGTATTGAGGAAGATAAGTGTAGTTTCTCT  
CTACTTTACTATTGGTGCAAGATCATTTCAATATAATCTCTACAATTATATTCTTAATTTGTTT  
CACTTATGTTATGCCAATACTTAAAGTGCCTGATAGAGAAAAATATATAGCAACCTCCTAAACAACCTACAACATTT  
TCATTTACACCCCCAACTTTAAAAAGTGACATCAAGGCCCTTTGAACTACTACCGAATGTCAAATTAACATTT  
TTGCATTTTTCTTCCCAAAATACCTTTGAGGTTACTAGAAATAAAACAATTTAAAAAATAAAGGGCTTAAT  
ATGAAAAGAGCTAACATGTTTTGATCTTGCTTGTTTCTTTTCAGATGTGGAGGGGAGCCCTCACCGAGTTGGTAGC  
AACTGCCTTTCTTATGTTTACCCTCACCTCTTCCATCATTGCATGCTTGGACTCACACGAGGTGATCCCAAGCT  
TCTTGTCCCCCTCGCCGTCTTCATTATAGCCTTCCATTCTCATGGCCACAGTTCCCTTTATCTGGCGGCCACAT  
GAGCCCCATCTTCACATTCATAGCCTGCCTCAAGGGTCTCATAACTCTTGCCCGCGCTTCCATGTACGTCTTGGC  
GCAATGTCTTGGCTCAATAATCGGTTTTTTTTATAATAAAAAATGTGATGAACCACCAAAACAGGGCACAAGTATTT  
CTTAGGCGGATGCACAATATCTACACTAAGCCGAGGGACTGCATTGGTTTTTGAATTTTGTGTCACATTTGTGGT  
GCTGTTTGTGTTGTGACGGTGGCGTTTGACAAGAAAAGGTGCAAGGAACCTGGGGTAGCAGTGGTGTGTGTTGT  
GGTGGCAGGGGCCATGGCAGTGGCTGTGTTGTGTCATAACTGTTACTGGGCAGGCTGGTTATGCAGGTGTAGG  
CTTGAACCTGCAAGGTGCTGGGCCCTGCGTTTGTGCAAGGAGGGGTGTTGTGGGATGGGCATTGGATTTTCTG  
GGTTGGCCCCCTTTTTGGCTTGCATTGTTTATTATGGTTACTCTATGAACTTGCCTAAGGAGGGTTTGGTAGGGGT  
AGAGGGGGAGTATGACATTTCCAGGTTAGTTGGGGCTTGTTTTGGGGAAAAATGGCAGTCCAACCTTCTCCTGAAGG  
AAAATTTTAGGTAATGTGTTTGGTTTGGCTCCAATTTCAATAGATCATGTAGTTACCATGTGAAATGACTAGGGGT  
GTATATGTGGACGCGGTTGCAGTTATTGGCAATATTCGCATCCGCATAATCTAGTTATTAATTTTAGGTATCCGC  
ATCTGAATCATGTAATTACTATCTGCATCACATGGTTATTGCAGTTATTATCCACTATCCGCATATGAGGTGATA  
AGCCTTTTTTAGACTTTTAAAGTTGTAATTCCTGCTTCTAATAAATACAAAAGGCATTTTAGTTTTTTCTTTTTTA



GTAAATAATCAATGCAATAGCAAGAGATAAGTACTAGATATTGTGCGATAGGTTCCATTTCTTTCTATATTGCGAG  
TGATAAAACTAAATTTATGGTCTAGACGTGTTTTTTTTTTTGGTTAGTAGTAAATGTGCAAATGTATGAACAATA  
TGGACAAAATGTACATAAAGATATTTTGAAGGAATAAATAATTCTTACATGATGCCTAAAAGCAAACATATACAT  
AAAAATTTTATATTTCTAGAAATCTTATCAGATTCCTAATTGTTGAAGCAATATTCTGATCATTTTTCTCCATGA  
GTCAACGATCTTAATAGTCAATGTATGGTTGGACTAAAGAGATGAAATACCTGCAAAAATAAGAAGATTGTTAAAG  
AGTTCTCAACCGGAGCTGAAGATACTCTAATGATTAAGTCAATACAGCTCATATTTGGAGTGTAAGAATGGCTTG  
GTTATGGAGTGGAACAAGCCTGTGTGTCAGAGAACATAAGAAAGAGAGAGAGAGAGAGGGGAGAGAAGGAAAGCTC  
TTGTGGAGAGCTCCTGAGAGAAAGAGGAAGAGAGAGAGAGAGAGAGA

>BpeXIP1;3

**ATG**GATATTGTTGTCCCCGACAAGGCGATCAGGAATTTCCAACATCATTTGAGAAATGCGAAGCACAAAATTTT  
AGAACAAAATTTCTTGTTCCTAGGTGCCCATGAGTATTTCTCCCCAGAGATGTGGAGGGGAGCCCTCACCGAG  
TTGGTAGCAACTGCCTTTCTTATGTTCCACCTCACCTCTTCCATCATTTGCATGCTTGGACTCACACGAGGTCGAT  
CCCAAGCTTCTTGTCCCCCTCGCCGTCTTCATTATAGCCTTCCTATTCCCTCATGGCCACAGTTCCTTTATCTGGC  
GGCCACATGAGCCCCATCTTCACATTCATAGCCTGCCTCAAGGGTCTCATAACTCTTGCCCGCGCTTCCATGTAC  
GTCTTGGCGCAATGTCTTGGCTCAATAATCGGTTTTTTTTATAATAAAAAATGTGATGAACCACCAAACAGGGCAC  
AAGTATTTCTTAGGCGGATGCACAATATCTACACTAAGCCGAGGGACTGCATTGGTTTTGGAATTTTGTTCACA  
TTTGTGGTGCTGTTTGTGGTGTGACGGTGGCGTTTGACAAGAAAAGGTGCAAGGAACCTGGGGTAGCAGTGGTG  
TGTGTTGTGGTGGCAGGGGCCATGGCACTGGCTGTGTTTGTGTCCATAACTGTTACTGGGCAGGCTGGTTATGCA  
GGGTAGGCTTGAACCTGCAAGGTGCTTGGGCCCTGCGTTGTTGCAAGGAGGGGTGTTGTGGGATGGGCATTGG  
ATTTTCTGGGTGGCCCCCTTTTGGCTTGCATTGTTTATTATGGTTACTCTATGAACCTGCCTAAGGAGGGTTTG  
GTAGGGGTAGAGGGGAGTATGACATTTCCAGGTTAGTTGGGGCTTGTTTTGGGGAAAATGGCAGTCCAACCTCT  
CCTGAAGGAAAATTT**TAG**

>BpeXIP1;3

MDIVVPGQGDQEFPTSFEKCEAQNFRTKFLVSVGAHEYFSPERMWRGALTELVATAFLMFTLTSSIIACLDSEVD  
PKLLVPLAVFIIAFLFLMATVPLSGGHMSPIFTFIACLKGLITLARASMYVLAQCLGSIIGFFIIKNVMNHQTGH  
KYFLGGCTISTLSRGTALEFCCFTFVVLVFGVTVAFDKKRCKELGVAVVVCVVVAGAMALAVFVSIITVTGQAGYA  
GVGLNPARCLGPALLQGGVLWDGHWIFWVGPFLACIVYYGYSMNLPKEGLVGVEGEYDISRLVGACFGENGSPST  
PEGKF\*

## NIP – Nodulin-26 like intrinsic proteins

**BpeNIP1;1**

>FXXK01000146.1:160668-172878 *Betula pendula* genome assembly, contig:

Contig145, whole genome shotgun sequence

>Bpev01.c0145.g0009.m0001

Chr *Bpe*\_Chr2 8,012,612-8,018,807 (1) ::

join(8012612..8012740,8013083..8013304,8016009..8016206,8016467..8016528,80  
18606..8018807)

>BpeNIP1;1

TCTGAACCTGTTTCATTTAAAAATATATGTTCCAGCCTAATGGTTGGAAGAATAGGGGAAAATGGGTTACTAAAGCCAA  
ATTAAAAAAGGAAAAGAATGAAGTTTGTGGGTGGTTGGTAGTAGTTAGTTACATCCAAATAATTGGTTTTGAGT  
GATCGAATCACCCCTTTGCCAATTTTGAAGTGGCCAAATTACCTCATTAATTATGAAAGTGATTTGGCTACTTCCA  
ATTGTTGGTTTGAAGGTGGCCAAATCACCTCTTAGTCACAAGAGATGGTTCAACTCTTATATATATACATTGTCA  
TAATCTAAACTACTCATTTAAAATACGTATCTTGACCCAAGGGTTTGGAGAATAAGGGAAGGGGTGTTGTTACT  
TAATGAATTGCTAATTAAGGTCTATTTGTTTCGTTATAAAATGATTTATGAAAACATTTTTTGGTGTTTTGT  
GCGACAGAAAATAATAGTCAAATCGTAAACATTTTCAATTTTCATTATAAAAGCTTATTTAATTTTCGTAAAATGA  
TTTCATTTTTTTTTAAACCATAAACTATTTTCTAAATTTGAATTTTTCTTTATCAAAACACCAGAGTTTCGCCGAAC  
TATCACCAGACCCTTGTCGAACCTCGGCTAGAAGTTGCTAAAAGGTGCCAGTCATTTTTCTCCATCGCTCATTTTT  
TCATATGAGGCAAACGATGAAAACATTTTTTAAAAAATAATTTTGTAAAAATATATTTCTATAAAAAACATT  
TTAGATTGAAATAAAAGAAAGCCTAAGCCATAAAGGGCCAAAAAAGTCAAAAGGTAGTAATGATG  
AGGAAGAAAAAATACGTGTTCCCAATCTATCATATGTTTCACAATTTTTTGTGAACCAAAATTCAGTATACTCA  
TGTTGAACAGCTTAGGATACCATGCCGACAGGGGTTTGATAAAGGCTCCTGGCAAATTTAATTAGGTCCCTCACA  
AGCAATTTATCCATATGAACAAGCATCCCTTTTTCTCATCTCCCATGTAAACAAAAGAATACGCAGAAAAGCTAAA  
TGTTTTTTTTTTGTGTCACTCAAATAATTATATACTTTTTAAATTATAATTGAATTAAAAATTAATAAGGATCT  
ATTACAAATTTGTGTGAACGATTAAGAGAACTTTGGGTGTGTTGGTAAACTCTTTATTTTTTTTTATTTTTTG  
AATAGTAATAAAAAATTATTGATGTAATATAAAGTAAAAAGAATGTTGTGAATTTTTTTACAGGAAAAAATGAAA

ATAATTATGTTTTTTAGTAAGTTTTTTATTTGAATAGTAATAAAGAGTTATTGATGTGATATAAAAAAGTGAAAA  
AAAAAATTGTTAAAAAGTGATTAATAGAAATATAAAAAAGTGAAGTTGATTGTTTTTAGAAAAATAAGAAATGAGA  
GGAAAAATGTTTGCCAAACCAGGCCATGTCATTTTTAAGTGACACAAAAATATATTTAACATTACTCAAAGAATA  
TACATTATTGAATAAAGTTAATGAATGAAACAAATGTCCTTTTGGTAAAGAGTTTTATTGTGAGTTTTTTTTGTTT  
GAATATTGATAAAAAAGTTATTGATGTAATATAAAGGCGAAATGAGATTTGAATATTTTTGTGAGATAAAAAAGCGAA  
AAAACATTTTGGTAATAGGAAAAAAAATAAATTGACTTATTTTTGAGAAAAATGAAAAAAGGGAATAGTGTGTT  
GCCAAACACACCCCTATAAAGACTCTTGAGGTGTAGAAATTTAGTACAGTTATAATTACTATCAAATGACATTTAT  
CACGTTAACATTTAAATAAATTAATTTACTTGTAAATTTTTATTATTTAATTTTTTTAACTCACGTGACATGATT  
GTCAAGTAAGTTCATAAAAAATATTATAAATAAAAAATTGTAATACTTCAAATATTTCTCACGAAATAGGCCACACTA  
CAATACAATAAAAGTTAAGACACCAAATTTTGTACATGTGAGGCATTTGGCATGCATTAATTAGCAAATTTATTGT  
CCATTGTTTTTTCGTATCATTTTTAAATTTTCCATAATTTAGTTCTGACTGAACTTTTTCAATATTAATTGTCAAA  
AAAAAACTTTTTCAATATTAGTAATGTGAAAGCGACAATATTATTATTATTTTTTTGAAAGGCAACAATTAATC  
TATGTAAAATGGGTCATAAAATAAGTCGAAGAAAAAGTATACATATTCTTTTCAAACGAGTATTTAATTTGCAA  
TGTTTCATTTTTAACTATCAATTGCGCCAACATCTTCTAAACTCTAAACCTTTGCAATGTATATATTTTATACCTT  
AAAAAGATAAAAAATGCCATAAAACATTTTCAGAAGACAAATGCTCTTATAAATTCGAAAAAAAAAAAAACCCACAA  
TGGTAGAAAAACATACGGTGTGGTAAAAAAAATGTCATAAAAAAAAAAAAAAACTTCCACAAGCAATATTTTAA  
AGTAATGCTATATTCGATATTTTATCTTATAATTATCATCAATAATAACATGACACAATTAAGTACCCATTGTAT  
TAATCATTATTAAATAAAGAAAAATATATGATTGTTGATTTAGAGTTCTACGCCATTATTAACATGAATGTTACTA  
ACATGTTTTAGGCCCATCAAGCAAAAAGGACCCATCCTTTCAGGATTTAAAGGTGAATCCGTTAAGATAAAGAAGG  
CAACAAGTAAGACCAAAAAATCAACAAGAGTGACATCTTAAATCCACTTGACCCACCCACCCAGCTTCCCAA  
CAAATCCAAAATTAACGATTTTTTCTCAACTACATCCAAATCCAAATGACAAAACCTACCTGGTCTTATCTTCAAA  
ACCCCCATTCAATCACTAATTTTCATGACTCTAAACCCCTCAAAGTTTTAATTTCTCAGATCATAATTAATTGCTTT  
TCAAAACA**ATGGGC**CATAGAAGAGCTAGAAATTTTGAAGGTTGAAGAAGGTGTTGGCACATCCGCCGCCACCAAAA  
CCAATTCTGATACAGTTACTGCCTTTTGTTCATCAGCTTCAGTAGTAACCATCACACAAAAG**GTAAGTGAATAAA**  
**AAAATATCAGTGCTCCTACTTCCTACTTCCTAGGATTTACTTTAAATATCTAATTAACCACCATAATACTTTATAA**  
**TAAACCATTATAGCCAACAAAATAGAAAAAGAAAAAACAAAACAAAACCATTTTAGCCAACCATCCTTGATCGAA**  
**ACGAATGCTCTTCGGTCTTCGTACAATTTTTTTGCAAATCAACAATTAATTTGTAGAACTCATATGAAAGATTG**  
**TAGATGAACCGTAGAATGATTAATAGCATATCTCATTTACTTTAAATATTTTATAATGAGGTTTTTGAAATAAGTG**  
**TCTCTATTTTGCTGGTTTTTTATTTGCAGTTGATTGCAGAAGTGATTGGTACGTATTTTGTGATATTTGCTGGTT**  
**GTGGCGCAGTCGCTGTCAATAAGATCTATGGGTCGGTCACATTTCCAGGCATATGTGTGACATGGGGTTTTGATAG**  
**TACGGTCTGATGATTTATACGGTTGGTCAATTTCTGGAGCCCACTTTAATCCCGGGTCACCATTACTTCTGCCA**  
**TCTTTTCGTGCTTCCCTTACAAGGAGGTCAGTCTTATAAGTCTGTATTCAAATTCCTGCCTCTATTGAAATTTA**  
**TTTTATTAAGTCTAGTTGGAACAGCACGTGCATTGCACGTGCTTGGTTCTCTTTGTTGTATATCACTCTATAAAATTA**  
**AAAAAATATGATATACTAAAAATAATTATTACATTTTAGATAAAATTATTAATGAATTTTGAATCAAAATAATACTT**  
**TTTAATTTAGATCAAAAAATGTGTATTTAAAGTATGAAAGTGGAAGTAGGATATTTCTTTATTTCTAATTATGA**  
**TGTGTATCATGTGTAGCCTTGTAACCTTTGCTGTTGACTTTAAGTTTCAAAATAAATTTGACTAACACAATGACAT**  
**AGAAAGAAAAAATTGAAATGGGTCTAAATACACACCCATCAAATCTAAATTTCAAATCATACCAATCTAACAT**  
**TATTTTCGTAGTCTATAATTAGTAGGTATAACAAAACCTAAACCTAAACCTAAAAAAAAAAAAAGGTAGAGTTT**  
**TTACCTTATTACAACCTATGGCCGGAATCTTTTCATTGGCTTCACCACATTCTTCTTATTATTCTTCTCTCTCC**  
**TCACCATCTTCTGAAACTCCCGAGTCCCAATACAACAAAACATTTAAGGGATGCCTTGCTTTTTCTCATAGAAGT**  
**CATTTGGCTGAATATGAAATCGTATCAAAGAGTGAGATATATTTGAAAAAATTGTGAACAAAAAATTATGATTAAA**  
**GAAGATGAACCAAACCTTATTTGCTCTTTACAGTGTTTGTAGATGGTGGAGAAAAAATTGAACTCACATTACAT**  
**TGTTTACATTTTACCAGGTTTCATCTGATCTTATTTGTTTTTTTAGTAATTTTGAAGTTGGTTGTAAATATA**  
**ACTGTATCCATGATTATCTAATTGTAAGTCTTTGTTTATCTAGTTATAACTGTTTCTCTTATCTAGTTGTAA**  
**ATAGTAATTTTAAAAATTTAAAAAATTATGAAAAACAAAAATAACCTGTCTGATTTAACCAATGAAGAAGAAAGA**  
**AAAAAGGTAAAAACGTAAATTTACATTATCAAATAAAATACACTATTTACGAGGCATTACACTTTTTTTATATAC**  
**CTTTAGGTAAGGAAATCTTGACTTTTTTAAATATGTATTCATTTCATTTTTGTCCATAAAGTTGAGCTATTCTTCCT**  
**GCAAATACAATAGCTCTCTTGATACGCTATTTATTCATTTGAATATCATGATGTAAAGTCTAATCATGTATATG**  
**ATGTTATATAAATTTAAATTTTTTAAAGATGTGTTTAAATTGACATCATAAACATCATTAATATTTAACTTAAA**  
**TTAATACCATAAAATAAAATAAATATTATTTATTTTCATTTGAAATTAAAAAAATAATGTACCGTTAAATTTGGAGC**  
**ACATATATATATATATATATATATATATATATATATATATATGCTCAATAGAAAAGAATTAGACCATCCTTGAG**  
**TATAGACTGTATAGTCCTTGTGTTGGGCTCCATCTCTTCAAGTTGACTGGGCTGGTAGGTTTTTGGTTTTGGACCAT**  
**ACGAAACCCACCAAGGTTTTTCATTGACCCTAAAAACTCATAGGTATAGAAATTTTTTTTTAAACCCGGTTTTAAAG**  
**GAAATTCTTTTTAACCAATTATCTAAAAGTGTTACGCGTCTTTTAAACAGGTGAGAATGACATGTTTTTTTTAATAAT**  
**ATGTGCTTTTTCAAAATATTTTGGCCTCAAAAAGTCACCTATCTTATCCACCAATTTTGCAGTGAGAAATGTTGAA**  
**AAAATATAAACATAAGAAGCTGAAATTCATATGATATACCACTTGAGAACTCGGAATGATCTTTTGTAAAG**  
**GAATTCACGCTATTTATTGATGCCTCTCATATTTGTCAATTTGAAAGAACTTAAACGGTGATGTTTTATTACAAG**  
**AACAAAACAAATAAGCCTACAACCTAAATGCAATTTGAGAGAAAAAGATAAGAGTTAATTGAGAGAAAAATTAGAA**  
**TTTCGTTACAAGTGAATTTGGAAGGCTTCTTCATGGCCTCTAAAAATGATTAAATGAATTAATACCCATCC**  
**AATGGGTTATTTATAAACAACCAAGAGTTGTGAATCAAGAGGTACAACCTTGGTAATGGTTGGACCAACATAGT**  
**GTGAGTATACTAAGGTCCAATTACTACCATAAACAATATATTTTTCTGTAAATTTGATACCTAGACAAGATTAA**  
**GAACAATTATGTCACAAGGGATAATAATATTTGTTGATTAATATCTACTTTTTCGCCCAAGCATAAAGGATAAG**  
**GAAACAATGAGAGACTGGTCCACCTAGAAGTAACCTAAGCCTAATAGCACCTTATTCGCTAGGGTATGAAGTAA**

TCATAATAGTACTTTATTTGATAGGGCACCAACCAATGGACCTGTAACCTGGGAGATTTCATAGGCCCTCCTTAGA  
ATTGATCAAGTCATAACTTAATTCCAACCCACTAGAGATATAATGATACGAACAAAAATTAGTGGGCATGAGTC  
GTCCCATTAATACGTGTCCATGGAAATTGAACTCATATTTTTTGTGAGCTCCTGTTTGTCTGTTGCTCATATAA  
TTCTCCGCCTTACCAAACCATAATGGGAGTAAGCCTCTTACCATTTTCGTTAAACTCTTTTGATGATTTGTTGATT  
AAACTCAATTATTACTCCCATAACTGCAGGTTTCTCTGTACATAGCGGCTCAGCTAATGGGATCAATTCTTGCT  
AGTGGCACATTAGCTCTTGTGTTTGTATGTAACCTCTGATGCTTACTTTGGAAGTGTACCTACTGGATCAAACCTCC  
CAATCCTTGGTTCTCGAAATTCTCTGCTCCTTCCCTTTTGATGTTTGTATCTCCGGCGTCACCACAGATAGTAGA  
GCAGTATGTAATCCAAATATGCCTTGGAATTTTTATATTTGCAAAAAAGAAAAAAAAAAGGAGTACATTTTCA  
ATTTTTAGGCTACAACACATGAGCGCAAGTAATTCAAAATGGGCTTCTGATGGGCCATTGCTTTTTTTTTTTGGCA  
CTTTTTCTATTTAAACAAATAAAGGATGCTACTTGTGAAATTCGTGATATTTGTGACAATTTTTTGGTTTGTAT  
GTCAATAATCCCATTCAATATTTTTTTTTTTTTTGGACAGATAAGTGAAGTAGCAGGGATTGCTGTTGGTATGACCA  
TATTATTAAACGTCTTCATTGCTGGGTAACCTCTCTATTTTGTGATAATGTTTGGGTACCAGTTTTATTAGACTG  
ATGTAGCATATTATGTGGATGGGTCCAAGTAATTAATGATGTGTTGCATTTGCATATCAGAATGTCACAAAACCT  
TTTTAAATGATAAAGATTTTTCTCGACATAAAATAAGGTCCCATGATATTTAATTAGAAAGGACTCACACTACAA  
TTTAGATTTTATGTTTTTTTTTTTCTAGTTTATAAACTATACTATCCATTATGTAACAAAAGAAAAAAAAAAGG  
ATAAACTTGGACCAAAACCATACGAAAGAGGATGTAATTTCTTACAAGGAAACCCATTCTTTATTATTATTTTT  
TTTTTTGAGCAATACAAGGTAAGGGAGGGCCATTCTTGATTCTTTTATCGGTAATAATTGTCTACTCTATAACAAG  
GTCCATGTGGACATATCATAAAATTTTCATCTTAGACTTATATTATAAGTATCACATTAGTTTGTAAACCTAGCA  
AATGTACAGTGAGCAATCAACATTTTAGTAATTGATATGATAAGTATCATGTGGACTGTCACGTCAAGTTGTAAAA  
ACTTATAATAAAGTTGTAACACCTATAACAATTTCTCGTTTGGCAATCACTAAAAACGTTAAAAAGAAAAAGAA  
AAGGCAATTGCCATTCAATTTACAATTTCTGAAAGCTCTTTTTTTTTTTGGGGAAATTTACAAAACCCCCCTGAA  
TTGTCAATTGCTTTTGAATCCCCCTCAAACCTTCAAACCTCTCAATTTAGTGTATTTAAGTTTCAATTTTTTTG  
CAATCCCCCCCCCTCCGTTAGGATTTTTCTGTAAATCCTAACTGAAGGGTGTTAAATTACCAAATTATCCTTAATA  
TTTTCAATTTTCAAATTTTTTTTTTTTTTAAAAAAGTGACCCACGTTGGGTACCTGACCCAACGTGGGTACGCC  
GCGACCCACGCAGCGTGGGCCAACCGTGACCACGCTGGGTACGTTGTGACCCAGCCGTGGGTACCCAGACCCAC  
GGCGGGTCTGTTTGTGACCCCGCCGTGGGTGCGGTGACCCACGCTGGGTACGGCGTGACCAACGCTGGGTACG  
GCGTGACCAACGCTGGTCACGGCGTGACCCAACGCTGGGTACGGCGTGACCCAACGCTGGGTACGGCGTGACCC  
CAACGCTGGGTACAAACGTGACCCAACGCGGGTCGCGACGTGACCCAAGCTGGGTACGCGGTGACCCAGCCGTG  
GTTACCAGACCCACGGCGGGGTACCACCAGACCCCGCCGTGGGTCTAGTGACCCACGCTGGGTACAAACGTGA  
CCCAGCTTGGGTACGTCGTGACCCGCGTTGGGTACGTCGTGACCCGCGTTGGGTACGTTGTGACCCAGCGTT  
GGGTACGCGCGTGACCCAGCGGTGGGTACCCAGACCCAGCGGGGTCTGTTTGTGACCCGCGGTGGGTCTGGT  
GACCCACGGGCTGGGTACGGCGTGACCAACGCTGGGTACGGCGTGACCCAACGCTGGGTACCAACGCTGACCC  
AACGCGGGTACGTTGTGATTGTGACCAAGCTGGGTACGCGGTGACCCAGCGGTGGGTACCCAGCGGTGGGT  
GGGTCTGGTTGTGACCCGCGGTGGGTCTGGTGACCCAGGCTGGGTACGGCGTGACCCAACGCTGGGTACCAAT  
CACAACGTGACCGCGTTGGGTACGTTGTGACCCAGCGTGGGTACGGGTGACCCAGCGTGGGTACCCCGTGAC  
CCAGGTCTGACCCAACAATTTTTTTTTTTTAAATAATTTTTTATTTGAAATAAAGGTAATTGTAATTTTTTAAAA  
AGTTAGGGGCATAAAAGTTATTTTACCCCTCTTGATCGTCTATCTTAACAGAATTGACTAACGGAGGGGGGATTG  
CAAAAAATTGAACTTAAATACACTAAATTGAGAGGTTTTGAAGTTTGAGGGGGGGATTGCAAAAGGCATGACAA  
TTCAGGGGAGGTTTGTGAAATTTCCCTTTTTTTTTTTGGTGTATGATGGTAACACAGTTTAGAATGAATAATTGC  
AGGCCGGTTTTCAGGAGCTTCAATGAATCCCGCAAGGAGCATACGGCCTGCTGTTATAAAGCATGTGTACAAAAGGA  
TTGTGGGTGTATATAGTAGGGCCAATTATTGGAACAATTGCTGGAGCATTTGCCTATAATCTCATCAGATCCACA  
GACAAACCACTTCAACACTTGCCCCGGAGTACTGGATCATTCTCTGAGACTCTGAAGAGCTACTACGTACAACATAAA  
TTATTGCAGGCTACTTCCAGGACCCCCCTCTATTTCCCGCAAGAACCATTGTTGTTATCTTTGTGAGTTAACCCAA  
GACCTGCAAACTCGTTTACAACAATTACTGTTTTTTTTTTTTTTTTTTTTTTAGATTTGATTAATACTTTCTTCT  
CATATGAAAGCTTCTGCTGGTGCTTTTTTTTGAGATGAGAACAAATTTATTTGTAGAAAGTTGTAAATAGGGGAAAA  
ATTACTTTTTTACCCCTAATGTTTGGGGCGATTTTCAATTTAGCCCCCAATGTTAAAAAATTCACAATGTGCCCC  
CTCAATGTTTAAAAAATCAATTCGGCCATTCCGTTACCTAAAAACGCTCTAACTTGCCGGATTACTGTTTCATT  
CGAATTTTTTTATTTATTTTTTTTTTACTGTTTCATGGTTAACCGTCTAATTTTTTTTTTTTAAATTTTTTAAATGGGTAA  
ACCGTAAACAGTAAAAAATAAAAAATTCGAATGAACAGTAATCCGGCAAGTTAGACGGTTTTAGGTAACGGAA  
TGGCCGAATTGATTTTTTTTTTAAACATTGAGGGGCACATTGTGAATTTTTTAAACATTGGAGGCTAAATTGAAATCG  
CCCCAACATTGGGGGGTAAATTATAATTTCCCTTTGTAATAATTATATTTAGTCATTACAGAATAAACGGGAT

>BpeNIP1;1

ATGGGCATAGAAGAGCTAGAAATTTCAAGGTTGAAGAAGGTGTTGGCACATCCGCCGCCACCAAAACCAATTCT  
GATACAGTTACTGCCTTTTGTTCATCAGCTTCAGTAGTAACCATCACACAAAAGTTGATTGCAGAAGTGATTGGT  
ACGTATTTTGTGATATTTGCTGGTTGTGGCGCAGTCGCTGTCAATAAGATCTATGGGTGCGTCATTTCCAGGC  
ATATGTTGTGACATGGGTTTGTATAGTCACGGTCATGATTATACGGTTGGTCATATTTCTGGAGCCCACTTTAAT  
CCCGCGTCAACATTACTTCTGCCATCTTTCTGCTCCTTCCCTTACAAGGAGGTTCTCTGTACATAGCGGCTCAG  
CTAATGGGATCAATTCTTGCTAGTGGCACATTAGCTCTTGTGTTTGTATGTAACCTCTGATGCTTACTTTGGAAC  
GTACCTACTGGATCAAACCTCCCAATCCTTGGTTCTCGAAATTTCTCTGCTCCTTCCCTTTGATGTTTGTATCTCC  
GGCGTCACCACAGATAGTAGAGCAATAAGTGAAGTAGCAGGGATTGCTGTTGGTATGACCATATTATTAACGTC  
TTCATTGCTGGGCCGGTTTTCAGGAGCTTCAATGAATCCCGCAAGGAGCATACGGCCTGCTGTTATAAAGCATGTG  
TACAAAGGATTGTGGGTGTATATAGTAGGGCCAATTATTGGAACAATTGCTGGAGCATTTGCCTATAATCTCATC  
AGATCCACAGACAAACCACTTCAACACTTGCCCCGGAGTACTGGATCATTCTCTGAGACTCTGA

**>BpeNIP1;1**

MGIEELEISKVEEGVGTSAATKTNSDVTAFCSSASVVTITQKLIAEVIGTYFVIFAGCGAVAVNKIYGSVTFPG  
ICVTWGLIVTVMIYTVGHISGAHFNPAVTTITSAIFRRFPYKEVPLYIAAQLMGSILASGTLALVFDVTPDAYFGT  
VPTGSNSQSLVLEILCSFLLMFVISGVTTDSRAISEVAGIAVGMTILLNVFIAGPVSGASMPARSIRPAVIKHV  
YKGLWVYIVGPIIGTIAGAFAYNLIRSTDKPLQHLRSTGSFLRL\*

**BpeNIP1;2**

**>FXXK01000231.1:15000-21500** *Betula pendula* genome assembly, contig:

Contig230, whole genome shotgun sequence

**>Bpev01.c0230.g0002.m0001**

Chr Contig230 17,343-19,985 (-1) ::

complement(join(17343..17562,18062..18123,18938..19135,19480..19704,19842..  
19985))

**>BpeNIP1;2**

GTATTTTTTAAAGCATGTACATTTATTTTAAATAACATTAATAAAAAATATGTGTTTTTCACATGCTTTAAGAACA  
CATGTTATTTTACTAGATTAGTTTGTAGAATTATCTACAACCTAGTTTATAGCTAATTTATGTCCTTAGCAAAAT  
AGGATTTTTTTAAAAAAAACAAAAAACTTGTTGGTCTTGTTAAAAGTAGAATTCATGTATTGCTATCCTCAT  
AAAATATTAAGATTAGAACATTTTTATCCGGCTATTTAAAGTAGGAATTTCTTATTTTAGAGAGTCAAAATTTA  
TTTTAGACCATTTTGTTGCTTTTATTCGGCTCCCTACTTTGAAAAAAAAGTAAGGAACATGAAATGCCATTTCA  
CTTTCCACTCTTCTTTAACTAATGAAATATTAATTTTTCTTTTTAACTGTTTGCTTTTTTCCAATTTTTTTCTC  
TTCTTATTTTTTAAAAATATTATATTTAAATAAAAAATGTGAAAGTATACCTTTAATTTAAAAAGTCAAAATGTA  
GTGATTAATAAATAAAGTATTTAAATAAAAAAATATAAAGAACCGAATAAAAAATGTTTACTCAAATCCTCAAC  
TAAGATTAATCTTAGGCTGAAGTCTTCCCTTAAGAAGGCAAACTCCAATAGCATTAGACTAACGGTAAACACCTC  
ATGGGTACCCGTCCACGCAGGATCTATAATAGTGTTTAGGGCACTTTTTACAAGGCATTCATGTCCCTCTGTATT  
TCCGGTGGGTTGTTGAAGCAGCCATCAATGCCTTTCCCTGTTTCACATCCTCTAAACATCTCTTTTTTCAACGAAC  
GGTATTTACTATGCTTTTCATATTTTAAATTAATAACAAACACATTTGGTCGTCTCTTTCTTTATCCCAAAAGCC  
CATTCTCTCTCTTTCTCTCTCCATCCTTTTTGGCCCAATAAATTGGAGTTGTTTCAGCTCGGTTCTTTGCCAAAC  
AGAGCAATCTCCTTTCTCTGATTTTTTCACCTCTGTTCTTGTCTCTTACCTTCTTTTCGTGTCAAGAGCG**ATGGC**  
AGAGAATTCGGGAAGTAATGGAAGCCAATCGATTACTTTGAATGTAAAGAATGTGAGGCCAATCACACCAAGC  
CTCCTCTGCCTCCAAAACCAACCATGGCGGAGGCTTCTGTGTCTCTGTTCCCTTTTATGCAGAAG**GTTGAACCAC**  
**CTAAACCCATCTATTTATTTGTTCTTAAATTTGAAATTTGATAAACAAATCTTATTTAAGAATGTTTTGGGTCT**  
**ATATATTCAGCCAATTTAACATGAAAAAGCGGAAATTTTTGTTGATGACAGTTGGTGGCAGAGGTGTTGGGGACG**  
**TATTTCTTGATCTTTGCCGGTTGTGGGGCGGTGGTGGTGAATTTGGGGAATGACAAGGTGGTGACTGCGCCGGGA**  
**GTATCAATAGTTTGGGGACTCGCTGTGATGGTTCTGGTTTACTCTGTTGGCCACATCTCTGGCGCTCATTTTAAT**  
**CCTGCGGTCAACATTGCTTTTGCCACTTGCGAGAAGATTCCATGGAAGCAG**GTAACCTACACCGAAGAACTTT****  
**TCATAGCTTGGGTGCAGTGCAAGAAAGTGCAATTAATTAACATACCTTTTGCAGTTTCTAAACAACCCACTTTCTT**  
**TCTGAGAAAAATCTTCAAACCTGTTTTAGAAAGCATGTTATTAACACCCATATCCAAATGGGTATGTAAATTCAT**  
**GTATTTACAAAAAATTACTTCAATTTTGGTGAATTTTCAAGGTATGATAAAAAACCATGACGCATATCATATGC**  
**CTTCTCCCAACCAATGCACACTGTATTCCAACCAATTTGTCTTTCTGATGTAACTTCTTTTTTTCTTTCTTTT**  
**GTCAAATTTATATCTTGTAGGTGCCAGCTTATGTATCAGCTCAAGTCTGGGATCAACAATGGCGAGCGGAACCC**  
**TTCGGTTGATATTCAACGGGCACGAGAACCGGTTTGTAGGAACAATTCGGCTGGGTCTAACTTGCAGTCTTTTG**  
**CGCTTGAGTTCATCATCACATTCTACCTCATGTTTGTATATCTGGCGTTGCAACTGACAACAGAGCT**GTTAGTT****  
**CTTCACCCTTTTATTCGTTTAATTTTGTAAATCACATGTTATTTCAAAAAGTTAAGTTTGACACGCCATATATT**  
**TAATTAATAAAGTGGTGAATATAGAGTTAGAATTTGAGCTCAGACTTCTGCTATGATATTGGTAAAAATATAGA**  
**GTCAGGATTTAAGCTCAGACTTATGCTCTAATATCGGTGAAATATAGAGTCAGAATTAGAGCTCAGACTTCTGCT**  
**ATGATATAGGTGAAATATAGAGTCAGGATTTAACTTTGGTGTCTTTCAGCATAGCAGTAGGGTCAGGAACATTT**  
**TGGATCAAGAAATGGGTGTAGAATTGACTTCTTTTAGTAATCAGCCCGAGACAAGAATTAATAAAAAAGAGATT**  
**TCATAGCCCTTCAACACACCAAGCCTTCTTGA AAAAATAGGAGTTAAAAGTCACCCGAGGACCAGAAGCTTTGT**  
**TGGCCTTTTGAGAGAAAACTCATCTCTAATTTTCTGATGCTATGATATATGTTAAATTACCAGTCATATGTTTG**  
**AAAAGTGGTGAATTAATTTAATTAACATTCTAACAAATTTTTAATTTATAATTGCACAACAATTTATAATTA**  
**GCCAATGTTATGTGGTTGGTTGATTAGTTCTCCTATCTTTATTGACCTATTGCATCGAGAATCTTATGAGATCAA**  
**GCAATCTGTCTGATATATATATCCAAGCGTGCTGAGTTATAATACTAAGATACTTTTAAAGCTTATCTGTGCTGG**  
**CAATTATGTATGAATTCCTTACACCGTTGAAATTAATATATTTTCTGTCTATGCAGATTGGAGAGCTTGCTGGC**  
**CTTGCTGTTGGGTCTACTATCCTGCTTAACGTCATGTTTGCAGGGTAATAGCTTAATCTAATCTGATTTTAATAT**  
**ATTCAACACCGATCATCTTTACACCATTTTTTATTATTATATATATTCATGTTTGTACATATTTAAGCAAAACG**  
**CTTGGAATGCTACCACTTTTTATTACAACCTTCTTACCAACTTGGAATTGGGACAAGTTGGTACTTATCTGTCCAAAT**  
**AAATTTTGACTGTTTTGTCAATTTATCCGGACAGGTGGGTCTCTTAAAGACTTATATTTTCTAACAACTCTGGACA**  
**GCAAAATTGATGAAATCTCTATCCTACCAACTCAAGTGGCAGACTGTTACGTGGTAGTTTACAATTTAACAACTG**  
**ACATGATAAGTGTTATTTAGACATGCACATGACCGTTCATCTTTTAGTGACTGATGCGATAAGTGTGACGTGAAC**

TGCTAAATCAGTTTATAAAGAACGTGTAATAAAAAATTGTAGTACCCCTTGCAACGCTGGTATTCTAACTATGTGCGGATGCTATTTTTGACAGGCCAATTTTCAGGAGCATCAATGAATCCAGCAAGAAGCCTGGGGCCTGCAATTTGTGCAACAACAAATACGAAAGCATATGGGTATACCTAGTGGCAACGACTCTTGGGGCTATAGCGGGTGGAATGGTGTACAAATAAATCAGGTTACGGACAAGCCGTTGCGCGAGATCACCAAGAGTGGGTCTTTCTGAAAGCGTCAAGAAAAACAACACTCTGTCTAACTTAATATATATAATTATTATATTATGAGATAAAAAAAAAAAGGCAAAAGTGTTCCTCCACGTTTTGTACTTGTGGTAATTGCTACGTAGGATGTGCTACTTTAGGCTTAAATGTGTAAGGAGGAACCCACATGTCTGTCTATATGTTATGATCGAATGTAGTCTCTGTATCTTAACAAACCTTTATAAATGAAAGTTTGCTTCATAGTTATAGTTGGTGTTGGATAAAGGTTTTTTTTTTTTTTTTTTTTCTTAATTTAAATTGGGTGGAAAGAAATTCCTAAAAAATAAATGCATGTGAGAACTTACTCCAAGGACAAATAGATATCTGTTTAATATATCAAAATTTAGATATTTGTACCATGGTAGTCGTTTTCTATTTTTGTTTTGTTGTTTTCTTTGGGTAAAGCTTTTCAGCCGGTGTTTATTTCCCTTCTTTGTGCTGAGATGTCTCTGGTTTTGTGGGATTTGTATCATCAATTGTTCTTTTTCATTCTTTTTAAGTGCATGTTCTCTTGGTGTAACCGTTTTCTCCTTGTTGTAGTTGTTGTTTAGGTTTAGGTAGTTTGTTCGGAGAACTTTGCCTTTGTTAACCGCCCTTTGTGGCGGTATCAATTTCTTGATGGGTGCGGTCATTTACTTGACCCATTCCCAATGGTTTTAGTTTGTTCATTGTTTGTAAAGTTGTTTTGGGGACTACTATTTGGGTGGCCACCCTTAATTTTATTTTTTTCTATGTAATTTCTCTTTTCTTTTACCAGGATTGAATAGAAATAAAAAATAAAAAATAAAAAATAAAAG

>BpeNIP1;2

ATGGCAGAGAATTCCGGAAGTAATGGAAGCCAATCGATTACTTTGAATGTTAAAGAATGTGAGGCCAATCACAAACAAGCCTCCTCTGCCTCCAAAACCAACCATGGCGGAGGCTTCTGTGTCTCTGTTCCCTTTATGCAGAAGTTGGTGGCAGAGGTGTGGGGACGTATTTCTTGATCTTTGCCGTTGTGGGGCGGTGGTGGTGAATTTGGGGAATGACAAGGTGAGTACTGCGCCGGGAGTATCAATAGTTTGGGGACTCGCTGTGATGGTTCTGGTTTACTCTGTTGGCCACATCTCTGGCGCTCATTTTAATCCTGCGGTCAACATTGCTTTTGCCACTTGCAAGAGATTTCCATGGAAGCAGGTGCCAGCTTATGTATCAGCTCAAGTCTGGGATCAACAATGGCGAGCGGAACCTTTCGGTTGATATTCAACGGGCACGAGAACCAGTTTGTAGGAACAATTCCGGCTGGGTCTAACTTGCAGTCTTTTGCGCTTGAGTTCATCATCACATTCTACTCATGTTTGTATATCTGGCGTTGCAACTGACAACAGAGCTATTGGAGAGCTTGCTGGCCTTGCTGTTGGGTCTACTATCCTGCTTAACGTATGTTTGCAGGGCCAATTTCAGGAGCATCAATGAATCCAGCAAGAAGCCTGGGGCCTGCAATTGTGCACAACAAATACGAAAGCATATGGGTATACCTAGTGGCAACGACTCTTGGGGCTATAGCGGGTGGAATGGTGTACAATATAATCAGGTTACGGACAAGCCGTTGCGCGAGATCACCAAGAGTGGGTCTTTCTGAAAGCGTCAAGAAACAACAACCTCTGTCTAA

>BpeNIP1;2

MAENSGSNGSQSITLNVKECEANHNQASSASKTNHGGGFCVSVPFMQKLVAEVLGTYFLIFAGCGAVVVNLGNDKVVTAAPGVSIVWGLAVMVLVYSVGHISGAHFNPAVTIAFATCRRFPWKQVPAYVSAQVFLGSTMASGTLRLIFNGHENRFVGTIPAGSNLQSFALFIIITFYLMFVISGVATDNRRAIGELAGLAVGSTILLNVMFAGPISGASMPARSLGPAIVHNKYESIWVYLVATTLGAIAAGMVYNIIRFTDKPLREITKSGSFLKASRNNSV\*

## BpeNIP2;1

>FXXK01000282.1:659099-670105 *Betula pendula* genome assembly, contig:

Contig281, whole genome shotgun sequence

>Bpev01.c0281.g0063.m0001

Bpe\_Chr2 4,593,561-4,596,959 (-1) ::

complement(join(4593561..4593786,4594005..4594066,4594153..4594347,4595128..4595352,4596819..4596959))

>BpeNIP2;1

ATGAAACTATTCTGTATATTTCTATGGTGATTTAACTGTGCACAAATCAGGCATATTTATAGCTGAATGAGACCGGTTAAGATATAAAATATAATAAACAAGAAATCAGAGGATTAAACAAAATATCACATAACAATATGAAACTATACAGAGAAATAAATTAACATTTGATTCGGTCTATAAATGGCAAATGATCATAACATAATCGAATTTTAATATCAGGCACAACAACAACATATTCTGAATATATATTATAACACGTACCTTAACTCATTGTGGTTAACGTAGAAGCCAACCTTAAATTTGGAAAAAGATCATAGAAATGTCCAAGTAGATGTGCTTTGATGAACACATCAACAATTGATCAACAGATGCAATAAGACAAAGGCAAAGAGTTCCTACAAGAGATGATGGCGCATAAAATAAATCGATTTTCATGTGTTTGGTGTGCTCGTAGGCACACCCATGTTCTGTAGGTGCTAGTCTAGCCAGAATAGCTCAAAGGTGATGTTAGTATGTGTGGTACAATACTCAGTCTCAGTACCATAGCGAGCAACAAACAATATAACACCAAGTAGAAAGCTATAAATAATGATGGAGTAGTGACAACCATGAACATCATGGAATGACAACCAATGAGATCACTTGGGCAACTAACTAGCCAATTGATTTGAAAGATGCATGTTTGGAAATTCACAAGCTTACCACCTCATCCAAGAGGCTAACTAGAGCATTTAAATGTTTGACTGTTTCGCCTAATTATGAAAATTATGATGGGCTGATAGAGTATCAACATCATATTCTAGCATATACATAGATCCTCATCACAAATTAATTTACACAATTTTAGATTGATATTCTATATCTAGTCATTTTTGTTTTCGACAAATGAACATTTTAATGAAGAGAAACAATTAACACATCATTGAGTCTCTTTTCAAGCAAAGCTCAAACCTGTATAAGGTTTTCACCTTTTTAGGTGAGAAGTCGAATATAGGCTGTAAGTTAGGAAGCTTTTTTATTTCACTAATCGGATTCCAATTCTCTACAATGACCGAACAAGTTTGGGCCTAAGAAATCAAAGGGACATGAAAGGTGGGTTGAGATAGGCCCAAGTTCCAAGAGGCTACGTAAATTGTGTTAGAGATACTAGCAAAAAATGTGTACATTTATGTATAACTATAAGGCATATGTAAATGCATATAACTCTTTGGATTATTGCAACAAAAAATAAACTCTTTGAATCCAAAGTTTTTTTTTTTTTTTTTTTTTTTTTGTGACTTAGTAACCCAGGGCACTTTACCTGCATTTGCAAGCAATGGAATTCGTCCTCAGTCCTCA

TAAAAATATCCTGTGGCATATGCGAGCCGAAAGAGATCAAGGTAGGAAAGGTGTTCCGATATTACTCAAATAATT  
AAATTTACACTTTTCTATCTACTTCTTTTGTGTTTGGAGACAAGTCCGAAGAGACTTTCGACTGAAATAGCTTTT  
TCCGGTACATATCATCTTTAAATATTAATGATATTTTATAAGAAAATAATAAACAGGAAAAAAGGAATATTATAA  
CAAGATATTTACAAAGGACAACATTTCACTTCAGAACATATATACTGTGTTGCCAACAAAAGAGTGAGGCCAGAC  
CCCACCTTTGCTTTCCAGGATTTATTTCTCCAAATTATGTTGATTTAAACATTGAAGTCATCTCATTAGCTCTT  
TCCGATAAGCTTTTTTATTAACTTTTATCTCCTTGTAGGTACTTTTGATCATTACCTCGACATCCAATTGACTG  
TTCTAACAGTTTGATACCATCTGTAGAAACAATAATTGTTTCTTGACAAAAAACCAAGTGCCAACCACATGATC  
GGAGAGTGCTCGTCTCAATGATGGTGCAACCTCTAACCACCTAGCGTGAGAACCTCTTAAGACCAACACATCAC  
GGCTATTCAGGTTTCATCTCTTGCAACTTTTATAGAACATGAACATCTCCTACAACCTTTCTCATTAACCATATCCG  
CATTTTTTAAACCGTTATCCGCATTTCGCATATGCCGGTAGTTAATATCCATCGATATTTACACTACTGACCCGA  
ATTGTGTATATATGAATTTAAATCAATCTCTAAAATACTATGAGTAGTTAAGGGCCGATGCTTTCTAAAAATAA  
ATGTTAAATACTACACCTCCATCCTAATTCAATTCTATTGCGCACTAATGTAGCAGTTCCCGCAAGTCCTTGGAT  
CAATCATTGCAAATAAAAAATATCGGTGCGATAAGAGTGTAAGATAAAGATTATTCTTTCTAGAATTGAATTATA  
TGCTTTTCCCCTAACAAAGTGAGATTATAAAAGGGTCTGAGCTCCTGCAGCTTAGGCACTCGACAATATCTTTCAA  
AAGTTGATTCTCTTTTTCGTCTTTTCACATTTCTGTCCTCCCATCCAGAAA**ATG**GCGACAGATCCGAAACCAAAGAATT  
TGGCTGAGGCAAATGAGTTTCGTCTCATTGGAAAAACCAATATCCCGCAAGCCAAAACAGGTCTTCTGAGGGCAC  
TACTTGAAGAACATTATCCACCTGGTTTTCTCAGCAAG**GTAAGATAAAGCTTCCAATAGTCCAACCACATCACTT**  
**CATGTCCTCTCTACAACCAAAAAGGACACATTTTTAGTTTTCTCAAGCTTGCTGGTTTCTTTGAGGCTTTCTCTT**  
**TTTCTGTTCTCTATATTTTTTTTTAAGAAATTATATCTCAGGCAGCATCAGCCTTCATTTTTTTTTTCTAATTGA**  
**ATAAGGAAAAGGTTACATGGGAGGATCCTTACCCTTGATCCGAAAGGAAGAGAGATGGAGGATCTTAAAC**  
**CGAAAAAGGGGTGAGCTCCCCAACAATAGACCCAAACAGAAAAAACAGGCAGAAATAAAAAACAGAAAGTAGAAA**  
**TTGGTCAAACAAGTGACCCGGTCTCTCAAGGGGCCGATAACGCGGTTACAGAAGCAAAATGGGCACAGATTAA**  
**GGCAAGCCTATCTGAACCCCCGCTAACCAACTGCAACAGCCACCAGAAGGAGGCTGATGCAGTGAATGCACTGTT**  
**CAAGTCCAAGTTCAGGACTGAAGTAGAGAGAGGGACCAACACTAATAACGGATCAAAAGTCTCCAAAAACAAGATC**  
**TAACAACAACATATTAGGGAGACAATAACCCAATACAAACAACAACAAATTACAAGAAAAAATACAGAAAAGTA**  
**ACAAAAAATCCAGCAAACAGCAGCAATGGCGGGGGGAAACGGCTGGAGCTCACTGGCAGGCACGTGAGATCCAC**  
**GCACCGGCGAGTGAGATCCACTCTCCGGCGCGTGAGATCCACGCTCCAGCGCGTGGCCGTCCGAATGATGAGCGG**  
**CTGATGGCGACGGAAGCAGACGGCGACGATGAACACTGTGGGGTGGCGCGTGACATGCTGGGTCTGGCAGAGGAA**  
**GGTAGATCAAGTTTTTAAAAAACCCATCTTCGAACCAAGACAGATCCGGCCATCAACACGGTGGATTGCGCGGTG**  
**GAGACGGTGTATGGCGCGGTGAAGATGGCTGCAGTGCTCCCGTGCAGTGGTGAGGATCGGCTGCTGAAAGGGGA**  
**AAAACACCAACAAAAAAGCAAAAAAGAACAAGAACGAAAAAACACGACGAACGGAGGAGAAGGGAGGAGG**  
**GAGAGTAGGAGAACCCTCCCTCCCTTCAAGGCACCACGAGCAACCGGACAAGCCCTCACTAAGGAGGTGGAA**  
**AAGCCTTACTCTCTTAGAGAGAAGGTGGAGACTCTCTCTCTAAAGAGAGAGTATTTTTGAAGGGTGATCGCCT**  
**TCATTTAGTAATTAACATTGATCTTACAAAATTCCCCATGCATATGTTTCATATCTTTGTCCAACATCCGGCA**  
**TGCATGACTCATTTATCTTTTTGAGAGAAAAGTAATTCAACGGAAACGAAGAAAACTATAGAAGAATGTACCATG**  
**TAATATATATGAGTCAGAGTTATACTCTAGCAAGGTTTCGTCAAGAACATAACTTTATTTGCGTAACACGATATA**  
**ACAGGTGGTGGCAGAGACTATAGCGACCTATCTTCTGGTGTGTTGTGACGTGTGGCTCAGCTGCTCTTAGCGCAGC**  
**TGATGAAAACAAAGTCTCAAACTGGCAGCCTCCGTTGCTGGAGGGCTCATTGTGACCGTGATGATCTATGCAGT**  
**AGGACACATCTCCGGCGCGCACATGAACCCGGCCGCTCACTCTAGCTTTTGCAGCTGTCAGACATTTTCCATGGAA**  
**GCAGGTACATGAGCTTCTGAAAATCCCCATGGTCGAAAACCTAGGCCCTTGGAGGTTTCTTTTTTGGCATTACATA**  
**CTGTGCTCTTAGGTTCCATCCATGGACAATGTGCTGTCAAAATTGTTATTTGTCTTTGTGCATAGATAAGAGTGGC**  
**AATTCGTGTTAACATGTTGAATTCAAGTCGTGTGAGGCATAAATATAAGACTATATAGCTCAACCCTAACCTAAC**  
**CCATTTAATTAACGGGTCAAACCTCTTCAACTATAACCCCTCTAATTTTATATTGAGTTCGTATAGAGTTTGCAGG**  
**TTATGTTAAAAATTTCCACCATAATGTCTGTCGAATTCAGGTTATGTTGAAATATATATATATATATAGACTATAT**  
**AAGTTATACGGGTCAAACCTTTTAACCTAATCTTTAATTTCTGTTGAATTCTGTCAAATTTGCAGATCATATC**  
**AAAAATTGACAATCTTAATCATAGACTCATATATATATATAATATATATATATATATATATATATATATATATGTTACATA**  
**GAACAATACAAATTTTCTTCGTCATTTACCCTCAGACAGTCGCATGAAAATAGTAATGTCCGTTGACTCCTATAG**  
**TTTTTGTTCCAAACATTATCTCCCATATTAATAATTGAGGACTTCAGACAATTTTATCAGATATTTACAAAAGTA**  
**ATAATTGAAGCATCTTCTTTTGCCTTAAATCTTAAAGAGAATTCAAAGAAGGATAAATAATGCTTATGCGATCAA**  
**GTAACAAAGGAATGAACGAACATTTTCTTGCAGGTCCCACTTTATGCAGCAGCTCAACTAGCCGGAGCTATTTT**  
**TGCTGCATTTTACACTGCGTGTAATATTGAACCCAATAAAGGAACCTCGGCACTACATCACCACCGGGACAGAAAT**  
**TGAAGCCCTAGTCATGGAGATAGTAGTTACATTTACTATGATGTTTACCAGCTTCAGCTGTTGCAACGGACACTAA**  
**AGCTGTAAAATTGCATTACATTCCAAATTTTACAAACCTCTTCAAATGTTAATGTACTGATCATTAGAAAAATG**  
**TCTCCACTTCCCCAGATAGGAGAGCTAGCGGGTCTAGCAGTTGGTTCTGCAGTATGCATTACATCCATCTTGGCC**  
**GGTAAGTAAAATTGACTCATAATTATTTACCTAACCCATGAAAACCTATTCCCTACATTGGCCAAATCCTGGATT**  
**AAATAGAACCTCCATGCGAAGCAAGGACCGAAATTTTACTAAGCTTCATCATATAGGGTAAATGCCAGGTCCGGG**  
**AAGACTCAACCTGGAAAACCCACCCATTGACCAATAATGAATACTAACAAGTTGTCTAGTCTACTCAGACCAA**  
**TATCAGGGGGATCTATGAACCCAGCGAGAACAATAGGTCCAGCAATTGCTAGCGCATCCTATAAGGGGATTTGGG**  
**TGTATTTGGTTCGACAGTGACTGGAACGCTTCTAGGGGCATGGTCTTACAACTGATTCCGGGTGTCGGATGAGC**  
**CTCTTTTATCCAATGTGCAAGGAGGGGCACAGCAAAGAGATGGTGAACAAATATCCTAACAAATCTGTG**TGA**AGG**  
**ATGGTTGTGCACACCATGGGGAAATTTGTGTCAAGCTTCCCGTATCTGGAATTCACACAAGTCTTACAACCTTTATG**  
**TGCAAGATCTTGTATATACTTTTGTATTAGCTTTCTATATCTGTTAGTAATGTGAGACCACCTGTGTGATAGTT**  
**ATATTGATGGAACAGTATGTAGAAACGATTTAACCCAAGCATAATTAATTTCTCAGCCCCAAAAAATTTAAAGCC**

AAATCTAAGGATAAGCACAGACCTCAAGTCCGATTCAAGTCGTGAAGCTTAATGATAATTCAAAAAACACACCATA  
AGTCTGTGCGATTTTACTTACAACACTGACACACAACAGAGTGAAACTCTTCTCCTCCCTACTTTTGGGTATG  
CCCTAACCATTTTTTAGCCGGAATAATATGAAGCCTGGACTCATGGCAACATCAATGCAATTTAAAGGAACGTGT  
CAACAAATGCCAAGGCATTATTAACACATCAATTTAATCTTTATATTTCTACTATATAAAAAACACATCAATATT  
TTAAAAAATTACATATGTAAGTGATATGTGCAGGGTCATAAGAACCAAATAAGTAATTGATCGTGGACCATTAACT  
TGAGGAATGTACCTTTAAACAAAGTGCATCATGAAGCAGCTTTTTTACACACCATAAACTC

>**BpeNIP2**;1

**ATG**GCGACAGATCCGAAACCAAAGAATTTGGCTGAGGCAAATGAGTTTCGTCTCATTGGAAAAACCAATATCCCGC  
AAGCCAAAACCAGGTCTTCTGAGGGCACTACTTGAAGAACATTATCCACCTGGTTTTCTCAGCAAGGTGGTGGCA  
GAGACTATAGCGACCTATCTTCTGGTGTGTTGTGACGTGTGGCTCAGCTGCTCTTAGCGCAGCTGATGAAAAACAA  
GTCTCAAACTGGCAGCCTCCGTTGCTGGAGGGCTCATTGTGACCGTGATGATCTATGCAGTAGGACACATCTCC  
GGCGCGCACATGAACCCGGCCGTCCTACTCTAGCTTTTGCAGCTGTGACACATTTTCCATGGAAGCAGGTCCCACTT  
TATGCAGCAGCTCAACTAGCCGGAGCTATTTCTGCTGCATTTACACTGCGTGTAATATTGAACCCAATAAAGGAA  
CTCGGCACTACATCACCACCGGGACAGAAATTGAAGCCCTAGTCATGGAGATAGTAGTTACATTTACTATGATG  
TTCACCGCTTCAGCTGTTGCAACGGACACTAAAGCTATAGGAGAGCTAGCGGGTCTAGCAGTTGGTTCTGCAGTA  
TGCATTACATCCATCTTGGCCGGACCAATATCAGGGGGATCTATGAACCCAGCGAGAACAAATAGGTCCAGCAATT  
GCTAGCGCATCCTATAAGGGGATTTGGGTGTATTTGGTCGGACCAGTGACTGGAACGCTTCTAGGGGCATGGTCT  
TACAAACTGATTTCGGGTGTGCGATGAGCCTCTTTATCCAATGTGCAAGGAGGGGCACAGCAAAGAGATGGTGAAC  
AAATATCCTAACAATTCTGTG**TGA**

>**BpeNIP2**;1

MATDPKPKNLAEANEVFSLENPISRKPKPGLLRALLEEHYPGFLSKVVAETIATYLLVVFVTCGSAALSAADENK  
VSKLAASVAGGLIVTVMYIYAVGHISGAHMNPVATLFAA VRHFPWKQVPLYAAAQLAGAI SAAFTLRVILNPIKE  
LGTTSPGTGTEIEALVMEIVVTFMTMMFTASAVATDTKAIGELAGLAVGSAVCITSILAGPISGGSMPARTIGPAI  
ASASYKGIWVYLVGPVTGTLLGAWSYKLIRVSDEPLYPMSKEGHSKEMVNKYPNNSV\*

## **BpeNIP4**;1

>**FXKK01001163.1**:60000-71000 *Betula pendula* genome assembly, contig:

Contig1162, whole genome shotgun sequence

>**Bpev01.c1162.g0002.m0001**

*Bpe*\_Chr1 16,645,942-16,653,541 (-1) ::

complement(join(16645942..16646158,16646421..16646482,16651141..16651338,16  
653042..16653263,16653431..16653541))

>**BpeNIP4**;1

CAATATGGTATGTACTATGCTCAAAAGGAAGAGAGTAATTGTTTGTGCCAAAAAATATTAGGCTTTAGCGAAGCT  
ATTCACTAGTGTGAATGGCTCAATGTCATTTTTTTTTTCTTCCAATGGTTTCTGAAGGCTTAGGGAGTTATCTTG  
TGTTTTTTTTGCTGAGTGTGAGAGCATTACACATGTTAGTTGTGAGGGCGATAAGTGGTTGGTCTAATTAAGACCC  
ACGAATTTGCGGGCGGAAGGAAGAGGACTGACGCAATTAGTTTGTGTTTTCATGGTGGCTCCTTGGTCCACTCAGA  
ATTGACATCCTTCCATAGCCTAACTGCAAGCGTATGTGTATTGAAATTACAAGGGAGATGTAAAAGGCTGAAGGA  
CAATTATAAACTGATAGACTTGTATATGGGTACAGAAATGCAAAAGGGTACTTTTTTCTTTCTTTTACTTTTTGA  
AATATTACAAACATTTTACATACAACAAAAGCCATGAGTCATTGACAAGGTAACAATGAAGTTTTCTATTTGTC  
AAATGTCAGCAGTATAGCTTCATAAGTGAAAAATGCATACACATGGCATGTGAACAAGTAAAAATTTGATTTGTC  
AATGATGCAAAGACTGGGCTTGGAGGTGTCTACCTCAATTGATAAAATCCATGTTTTCAAACAACATCCTGAAAT  
TGAATCCTGCATATATGTATAATTACGAAGTTTAAAGAATAGAAAGAACTGCCTCCGGTTGCCTAATCCATAGAC  
CCAAAGATCTCTAATTCGAGTCCAAGGGGCCAGCTGCATGCCACACTTGGGTGCTCGATGGGCTAGTCTTAATA  
ACCATTATTGGACCAAATACTATATAGCATCCAGGCGTTATGCGTCTTATATTTTTGAGTGTACAACGGGCGGTT  
ATTCAACCGGAAAAAACCGGATAACCGGAAAACTGGGAAACCGGAAAAAACCGGAAAAACCGGAAAAAACCGGAAAA  
CCGCAACCGGATAACCGGATAACCGCTAGGCCGTTGCGGTTGCGGTTTTTTATTTCTGAAAAAACCGGTTACTAA  
CCGGATAACCGGTAACCGGTTTAATATATAATATTTTATAAAATAATATTTTATAATTAATTTAGACTAAACTA  
AAAAAATAAGGATATCAGTTGAAAATGATGTCTCATAAATATGTATTTTAAAGGTTCTATTGAAAGTTTATCTT  
GGAATTCACACCATAATCAGGTAATATTGAAATTTTCAAGAGCGAAATTTTATATGGGGGGAAGAATTTTCATGCC  
CTGCACAAAACACGTGGCATACTTTTTTTTTTACAAACAACCTGACTTAAGTAAATGTATGTATGTAATATTTTAAAC  
ATATATAAACTGAGGAGGCCTTATAAAACCTTAAAGAAGCCCTAGGGTGGCCATTTTTGCTTGCCCAACAACC  
CTAGAGAGAGAGAGAGAGAGAGAGAGAGAGAGAGAGAGAGAGAGAGAGAGAGAGAGAGAGAGAGAGAGAGAGAG  
AAATAGCTCCTACCTTTAAGGTAAGAATGTTTGATATAGTCTTGATTTGTGTTATGTTCCATGCTATAAAAGCTC  
CCTACAAATGCGCATAATGATCTTTGTGGAGAGCCTTGGTGGGTCAAAGGCCTGTGCACACTCGGAAACCTCTC  
TATGTTTGACATTTTGTCTTCCATCTTTTGGCTTGGCTCAGTGTCACACACATCCGTAACAACCTCCCAAAGCA  
GGAAACCATCAATCGTTATTTTTGTTTAACTTTTAAATTTTCTTCCATGACTTCCGAATCGACTTCAATTTCTAT  
CATACAAGAGAAGGATAGATTCTTGTGTTATTATCATATCATCTTACTAATTTATTTATAGGTGGAG**ATG**TCT  
TCACAAGACATCACAAAGGTGGAAGAAGGGAATAGCTCTTCTTCAAACAACATGGAAATTCGGGGGTGTGCAAT  
TCATCTGAGATAGTTTCAAGCTCGTTCAAAAG**GTAAACAACTTTTT**CAGTGACTCACTCAGGGTAGCACAATTTTT

ATTATCAACTATTAAAAAAATAAAAAATGTAGGCATGAAATTAATTATTGTGGACAATTACATATTGATATGATG  
CTCATATCCTCCTCCTCAATTTTTTTCATTTATTTTACTTTTTTTCAGGTAATAGCTGAAGTGATTGGGACATACT  
TCTTAATTTTTTGCTGGGTGTGGCTCGGTCGTTCAATAAGATATATGGTTTCAGTATCATTTTCCCGGGATTGTG  
TAGTATGGGGTTTGATTGTCATGGTCATGATTTATTCTGTTGGTCATATCTCCGGCGCCCACTTTAATCCGGCAG  
TCACCATCACTTTTGCAATCTTCAGACGTTTTCCCTCAAACAGGTAGGTTAAATCCATCCAATAACAATTCAC  
ATTAAAGGAAATGTGCTAGTATTTGATGAAGCTTTTCAGATAAAGTGCTTGACACAAAAATAGAGCTTAAAGCAC  
CAAAATAAGTTTTCTTTAGATTTTTCTTAAATATAAGAACTAAATTATTTTTTGTTTTTTATTTCAGATAATCT  
GTATAATAGTTTTTCTTATATTTTTCTCTATGCCATTTAAATATTCTTTAAATTAATAAAGAAAAAAAAGAG  
TAAAGAGAAACCATTTAAATATCATTTTTAAACAATGTTAGAGAAAAAAGAAAGTTTTTATATTAAAAATAACGTT  
AATGTAACCACTTTTGATTATCTAGATTTAAGGTACAATTCTTGGTTCCCTTAGTGTTTTCTTAGTATATGGAAC  
AACAAGAGAATTTGTTTAAAAGGTTTTTTAGGAATTTTTCTTACATTTAGAAAATGAAATAGGTTTTAGGAAAGC  
TACTGTTAGCGCTCTTATAGATTGATTAGTAATGAATACACAAATAATTAATATATATGTATATAACCACAAGGA  
GTTAGCTCAAGTAGTACGGGTTTTGGTCTTGGTGACATCTCCGTCAGACTAAAGTTTGAATCCCTTGAGTGTA  
AACAAGTTCTTGGGGCTACATCAGCGGCAAAGCCGTAGACTTACCCGATCCGTATGCCTTAATCATGTGAAGTGA  
GCGCTTTGCACGGATATGGGTTTGCCCCACAGGGGTAGGTACATATAGGAGTGTAACGCGGAATGATTATTAAC  
CGTTAATAATCGGATAACCGAAAAATCGAAAAATAAAAAATAACCGCAACCGGATAACCGCTAGGCCATATATAT  
ATGTGTGTGTGTGTGTGTGTGTTCATTTAGCACATCCGCATCCACAGAGGAATGGGAAGAAGTTCCTAACCATCGTG  
CATGGCCTGTGTTGGAATTTTTTGAATATATCTTGTGGTAGCTTGTTAAGTCTATATGTTATTTTTTATGTTATT  
TATATTTTTTATGAGAATATAAAATAGTTCTAAAAAAATAAAAAGTGAGTTTAAAAATAGCTCAAAAAAGGCCTA  
AAAAATGAAAAGAGATTAAAAAGATCCCTTATTTGAAACCGGTTACCAGTTTAAAACCGCATTAAGACCGGTT  
AGTAGCAACTGCAACCGCAACTAGTAGGGTTGTACGATTGCGGTTGTTTAAAAATTAATACTAGGGAGCCATAG  
TTGCGGTTACTATTAGTTGGAATAACTACAACCACAACCAATTGTACACCCTTAGGTACATGTAGTGCCACCCC  
CTTGACAAGTTTTCCGTCGTTAAACATATATATATATATATATATATATATATATATATATATATATATATATAT  
GAAAACTAGAAATGGTCACTAAATTTTTGTTAACTAAAACATTTTTGTTATTAATTTGCTTACAATAGGACTCCC  
TTACATGTGCTCGAAAAAAATATATTGATAGCCAGAAAAGAAAAAGAAAAAAAAGACAATAATTAATAGCT  
TTAAAAACATTATTTTTTGCATTTTACGTTGTACGTAACAATGATCTTATATATATATGAGTCAGAAAAATTTAGTTT  
ATAAAAAATTATAGTTTAGCGTTTATAAAAAATGATCTTATATGAGTCAGAAATTTTGGGTTTATAAAAAATTTAT  
AGTAAGTTTTTTCTTTTCGCAGGTGCCTCTATACATTGTGGCGCAGATGATAGGATCAACTCTTGCTAGTGCCAC  
GTTATGCGCTCTTTTTCTGTAGATAAAAAGTCTTTCTTTGGAACAGCACCGGTTGGATCCAATTTTCAAGCTCT  
CATTATTGAGATAATCATCTCCTTTCTTTTGATGTTTGTATTGTGCGGCGTTGCCACCGACAATAGAGCGTTAG  
TAACCTCTTAACCACAATTGCTTGCTTGCTTATTGTGTTAATTGATCATTACATATATATCTTTCAATTTTTTCCA  
ACCGATGATTTTCACTATTTCTAGTGAAGATTGAGGCCATCAGTTTTGTGTGGATTTTTATAAATTGTTTAAATCAA  
GAGGTGTTTTCAGTTGATTGAAAAAAAATGGAAGAAGTGAACCAAGAAATAAGAAAAATCTATTAAATGGGTC  
ACTAATACACAAAGATGGTACAAGTACAACACACACAAAAATCACTCTCTCACACTCACAAAAATAAACATTTGCA  
CACTTCACACACTCTCGTAAGAGCATTACATAACAACACTCTTTAATTACTTTGCTTATCTAAATACAAGAAAA  
TTTAAATAAATAAATAAAAAACCACAAAAAATTACTTGTAGCAGCTTTCATATAGGTTCTTTAAATGTTGGGTAT  
GCTATAGTGTTACGCAATGTATAGGAAAGCTTTTTAGGGAAGCTAGCTTTCCTATCCATTATTTTAATCCAAAT  
ATTTCTCTTTTCATCTTTCTCTCTCATCTTTTTGCCTTTCTTGGAGACTATGTTGGGATTTTATAAAAAAAA  
AATGAGGGTAAGTAGGGAATTGATATTTGTAAAGAAATAATATTTTAATAGTATCAAAAAATAAGAAAACTAT  
TATGGAATGTATTTGGATAGAGAAACAAAAAGTAGTTTTATTCTTACATTTAAGAAAAATCAAAAAGGAATGTGC  
TATGAATACTCTAAGAATACTAATAGCAGCTTTCCTAAATCCTATTACATTGCCTAAATGTAGGAAAACTCATA  
AAAAACAACTGAAACAGATTCTCTAGATGTTTCTTAAACTAAAGGAACACCAAAGAAACCAAAATGATACCCG  
ATATCTATGGTATCACTTATGCTTCCCTTATTATTTTAAATAAAAAATGTTTTCTCTTTCTCTCTATTTCTCTCT  
AATATTTATTGAAACAATATGTAAATGTCTTTTCTTTCCCTTAACATTTAATTTAAATGTTTAAATGTTTAAATG  
TAGGGAAGGATAAGGGAAGCTATTGTAGAGTTTATTGAAATAGAAAAGTAAAAAGTTGTTGATTCCCTACATTT  
AAAGAAATCTAAGGGAATCTGTTGCTAGTGCATAAGAACATTTCCAATAGATGCTCTAAAACCTCCATATTGCG  
TATATTGAGCGAATATATAGTAAAAATCACGTCCAACAACCTATTTTTCTTGTTATCTAAAACATATATTTGTTT  
TTTGATTAGCTACTTTTAGGCAAGCACTTTAACTTATATATTCTTTTTTAATCATTTCTCTCTATTTCTCTTTCT  
CGTTTAAGAAAAACAATAAAAAAACTAAAAAATAATATTTAAAGATAATATAGAATGGAATAGAAAATTTATTG  
AACTTTGTATTAAAAAAAATAATAGGTAAAGTAAAAAAAATTTGATATTTTTTTATTAGCTGCAATGCATAAT  
ATTACTGGAGATGATCTAAGTGTGCCATCACACTAAATTACATAGCTCTCACCAAAAACTACTTAGAGCACTCT  
CATTAGGCAGCGTGGGTGTAACCAAAATGTTAAAAGGGTCTAAAAAGTTCTGCATCACAAATTTGCTCAAAATAT  
TTGGTGAGTGTAAAAAATTTGCAAGCAGGACTATAAGTAGCATTGGAAATAATTTGACATGATAAATAAGAGCTT  
TATTTTCTTTACCTAGATCAACATATATATTTTTTAAATATGACCGTTATGAACAGACAACTTTCAAAGAGAT  
TATTGTTGGAATAAATAAAGAAATATTTTAGAAAGAATATTTAAATGAAATTGTGAAAGTGGAATACTAAGA  
TGCTGAGCCTAATCTAATGCTTTGAAAGGTAGGTAGCTAAAATAGAAAAATTTTATTTTATTAGCTAAAAATAGA  
GAGTAAATTTGTTGATGACTGATGTGAATGCTCTTAACCAAAAAAAGAGAGGAGGAGGGAGGTC  
ATCCATTGCCCCACTAATAGGTGGTGGGACCCACGGAAGACCTAGTTGGGTTGCCCCATCCACTTATGTTGAC  
ATTGGTTGAAAGGGGCATGGGCAGGTTTCCCTATTACCCACACTAAGAGGGTGGTGGTTGGCCACCCACCAAGC  
CACGAAGGGTGTGGGTGGGTTGCACCCACGCTGCCATTGGCCAAGGGTGTGTGGGTTGATGACCCACCCACGCCT  
GCTGAGGGTGGGTGGGTCTCCTCACCCTTCATGGGTTGCAACCCACCCAAGCCCTATTTAGGAGAGGGGGTGTG  
TGTGGGTTGCAATCCACACCTTTTGCTAGTGGGCTTATTGTAACCCCCGATCTTATATTGGGAAGATGTGGAAT  
AGTCTGCATATAGTAAGTGGTTTATAAAGAGAGTCATAAGTGTTAAGTCTCATATTGCTTAATTACTAGTTAAAA



CTGTACATTATAAGTCATTCTAGAAAATCTTTAAAATTGACTAGTCATTTTAGGGTGATAGCGTAAAAGGACTAA  
TCAATTTTGGAGTTTTTCTAAAATCACTTATAAAGTCCAGTTTCACCTAGTAACTAGGCAATGTAGAACTTAGCA  
CTCATAACTCTTTTTATAAATTACTCACTCTATATGGCATATTTCTCATCTTCCCAATATAAGACTGAAGTGTTA  
TACTTACTTCCTTCACTTACAGCTTAAAATGCATTTAGCCCTTCTCTCGCTTCCGTACTCGGTACTCAAGCACGA  
CATCTATGAAAGCAGCAATGGGAGAACCAGTGGTGAACAGGAAAAGGGATGACCACCCGGTTCGCTAGGAAAAAGC  
AAGCCTATGAAGGAGCAGACCAGTGGGGTCGTTTTTCAAGCAGAATATAATAGGTTGGTGGGTGGATTGCCACAC  
ACACGATAAAGGGAGGGGGTGAGGTCGCCCCATCGGGATGACCACCCGATCGTTAGGAAAAAGCAAGCCTATGAA  
GGAACAGACCAGTGGGGTCATTTTTTCAAGCAAAATAGAATAGGTTGATGGGTGGATCGCCACACACACAATAGAG  
GAGGGAGGTGAGGTACCCCATACTCCGACTAGTAGAGAACATGGGTTCGCGACTCTCTACCTCTGACGGCTTAAG  
CGGGTCAATTTTACCTGACTTTAAAAGCAATTCCAGCCAATCAAGGGGCTACCAAAGGAAGCCCCAAGAGAGAAAAGAGAGAGAAG  
TCACCTAACTTTAAAAGCAATTCCAGCCAATCAAGGGGCTACCAAAGGAAGCCCCAAGAGAGAAAAGAGAGAGAAG  
GAAAAGAATGAGAGATCTAGAGAGGGGCGATGAGAGAAAAATGTAGAGAGAGAGGAGGAAAAAGAGAGACGTGACA  
GAGTGGGGGAGAAAAAGAGAAGAGGGGAGGTCAATTAGCGGTGGTTGGAAAGAGAGAGGTGCATGGTTCTAGTTTT  
TCAACACTTCCCAAATATTTATGATGGTCCATGAACCTTATCAGGCTCTTTTATATCGTCTTTCTCATGATAGGC  
AATGTTAATATATTTGGGATTTGATTGCCTTAGCCAGCTTGATCTCTAAAGTTATGGTTCTGAGGTCTCTTCTAT  
TTCTTGATGTTGACTTGGATAAAAAATCTGCTAGCTAGAGCATCTAGATTTACCCCTTCTTTTTCAGAGGCTAACAG  
ATCAACCTCCATCCGTAAAGATCGAACTCCTCATTCTTTAACTTGTTCTAGTTGTGCTCTATCTTCTTCAGGTT  
GCTCTTGATGCTTGAATTTCCATTTTCATTTAAATCTGGCAGCAACACTTGCTCTGAATACCACCAAGATCGATGAA  
GTGTCGTCAAATACAACATTAATTCATGATGTCTATACAATGTCTTCTCTCATCATAACCCCTCAAAAGGC  
ATCGAATTAATCTTTTTCATCATACCTTTAACATCAAACTATGCTTTTGAAGGTAATCATAAGAGTTTGTATACCTTTG  
ACGACATATTTCTATTTGATACCTTTATGGTCGATGATAGGTTCTTGTTGTTTCATGGAAGGGTGATTGGGATTGAA  
TTGCAAACGAAGTTGGATTTGAGTGAAAAAAGTATATCTCATTTTCATTGGGGCAAGAGATACCACAAAACTCGA  
CTTGGGGCGAGAGAATATCACAATTTGCCAAATAGTTTTCTCCCAATTCCTTCATAACAATATAATCTTTAAAT  
AGGCTACAATAATTGATAAGAATCCAATGATAAACTAATCTTAATCTTAATTTTAAAAACAACATAATCCTAAT  
AGTCGAAGTTGATCACTTTTTCTTCTGGCTAAGATTGTTAATCAAACCTCTTCGCAAATGATACTTGTAGATCCC  
ATTCATCTTCATTGTCATATGCTTAATTGGTGATCGTTTCGATGTCACCATGTTTCTTTTGTCTAACTTTTTCTTG  
GTTTAAATCTCAAGTTCTTTGGCCACAATTATAGTATTTAACACTCTGATTTTTCGAGATTATATTTCCCTTGAAT  
GTTGCTTATCTCTTTGCACGTTATTAATTTTTTGGAGTTCATCCTGATTGAGAATTCCTTCTCTGTTGACCTTTTT  
TCTTGTCTATCTTTTTTAAATTCGGGATCTTCATATTTTTATTTGGTAAATTAAGTTGAAAAAATFCCCCCTCTTT  
CAGATTGGAGAATTGGCGGGAATTGCCGTGGGGATGACAATAACCTTAAACGTGTTTGTGCGCGGTACGTAAAT  
TCCCATCCCTACTTCAACTTGAAGCCATATTATATATAGGAGAAAAATGTGTGATTATCTTATTTGTAATTAGA  
TTTTTGTGGTATTAAATTTGAGTAATTTTAGGACTATTTTTTATCATCTTAATGATGTGGCTTTTAAAAATCA  
CAATCGAATTAATAATTAACAGTGATACATCTCAAATTCATGGTTTTTTCTGAAAAATGATTAACACACTGGGT  
TTCCTGATTATTTATATATGATTCCAGGCCAGTAAGCGGAGCATCTATGAACCTGCCAGGAGCATTGGGCGCTGC  
TCTTCTCACGCACATGTACAAGGACTCTGGATTTACATACTTGGGCCCCCTCGCAGGGACCATACTTGGTGGTTT  
CGCCTATAATATGATTAGATTACCGACAAACCACTCCGGGAGTTAACCAAGAGTGATCTTTTCTCAAAACTTG  
TCCAAAAAATGGTTTC**TAA**AACTTACCAACCTTTTTCATAACTTTCTTTAGCCAGTGCAGCTTACACCTTGT  
TATGGTGCTTGTGGCTTACGTTAGGTTAGAGGAGGAAAAACATTAAATCAACATTAAACTTGTTTTATCATTTA  
ATTCTGTAATTGTAGGTTTCTATTTTTTTTTTCTTAATTTGCCTCATATACACATAATTCTACCTACATGTTTGT  
AATACGCAATTTTTTGCCTCTTGACATGTATCTGCTACTGTCTTTGAACCAAATGATACAAGATTGCAATTGCAA  
TTCACAAGTTTTTTCGATTACAGTTGTACTATATATGCAGTCTCTCTCTCTTTTTTCTCAAGCATAAAAATAAAT  
TGTTTCTTAACATACTTGAATCTAGCTTCAACTCAATCACCTGCTAGCTAGAGAGAGAGAAGCTAAGGGGAAAAA  
ACACTACACCCATTTACGAGCAAAGAAAAAAGGAAAGCTAATTAAGAAAGGAAACAATATATGTGAGAAGAAGT  
GGGTCTTTTTTGAATGAGCAATTATAGAGAGTCACAGAGAGAGAAATGTGAAGAGACGTGTTCTAACTTAGACG  
TGTCCTCATACGTTAGTGAATTTTTTTTTTTTTTGAAAAAAATAAATAATTTGTGCATGGTTTATGAACATCGAT  
TTTTTATTTTGATACGAACAAAACCTAATTTTTTAGGCTGATGACTTTTCCAAGATTCTTACTCACAAAATGTGATT  
CCAAGGATCCTAAAATAATCTTTTGTGTTAGTGTCTCTATCATGTGTTTCGACAATTTGTTGCAACTCCACATGAAG

>**BpeNIP4**;1

**ATG**GTCTTTCACAAGACATCACAAAGGTGGAAGAAGGGAATAGCTCTTCTTCAAACAACAATGGAAATTCGGGGGT  
GTGCAATTCATCTGAGATAGTTTCAGCTCGTTCAAAGGTAATAGCTGAAGTGATTGGGACATACTTCTTAATTTT  
TGCTGGGTGTGGCTCGGTCTGTTCAATAAGATATATGGTTTCAGTATCATTTCCCGGGATTTGTGTAGTATGGGG  
TTTGATTGTCATGGTCATGATTTATTCTGTTGGTCATATCTCCGGCGCCCACTTTAATCCGGCAGTCACCATCAC  
TTTTGCAATCTTCAGACGTTTTTCCCTCAAACAGGTGCCTCTATACATTGTGGCGCAGATGATAGGATCAACTCT  
TGCTAGTGCCACGTTATGCGCTCTTTTTCTGTAGATAAAAAGTCTTTCTTTGGAACAGCACCGGTTGGATCCAA  
TTTTCAAGCTCTCATTATTGAGATAATCATCTCTCTTTCTTTGATGTTTGTATTGTGGCGGTGCCACCGACAA  
TAGAGCGATTGGAGAATTGGCGGGAATTGCCGTGGGGATGACAATAACCTTAAACGTGTTTGTGCGCGGGCCAGT  
AAGCGGAGCATCTATGAACCCCTGCCAGGACATTGGGCTGCTCTTCTCACGCACATGTAAAGGACTCTGGAT  
TTACATACTTGGGCCCCCTCGCAGGGACCATACTTGGTGGTTTTCGCTATAATATGATTAGATTACCGACAAACC  
ACTCCGGGAGTTAACCAAGAGTGATCTTTTCTCAAAACTTGTCAAAAAATGGTTTC**TAA**

>**BpeNIP4**;1

MSSQDITKVEEGNSSSSNNNGNSGVCNSSEIVQLVQKVIAEVIQTYFLIFAGCGSVVVKIYGSVSFPGICVWVG  
LIVMVMISVGHISGAHFNPAVTITFAIFRRFPLKQVPLYIVAQMIGSTLASATLCALFPVDKKSFFGTAPVGSN

FQALIEIIIIISFLLMFVICGVATDNRAIGELAGIAVGMTITLNVFVAGPVS GASMNPARSIGPALLTHMYKGLWI  
YILGPLAGTILGGFAYNMIRFTDKPLRELTKSGSFLKTCPKNGF\*

## BpeNIP5;1

>FXXK01001046.1:25000-30089 *Betula pendula* genome assembly, contig:  
Contig1045, whole genome shotgun sequence

>Bpev01.c1045.g0004.m0001

Bpe\_Chrl1 981,169-985,394 (1) ::

join(981169..981384,984138..984557,984669..984730,985199..985394)

## >BpeNIP5;1

TGATAAAATAATTAAATAAAAAATTTAGTTTATTAATTTTTCTTAATAATCTTGAATTGTCATATTAATTTGTTA  
ATGATTTTTGTAGTGATAGATATAAATATCCTATATTTTTTTGAAGTATATTATTTGATTGATACGTCATGGTCTTA  
ACTTGTTCCCAAATACCATTGGAGAAATAAATAATGCATGAGTGTATGTGTGCTGGGCAGTTAGTCAATTACCTT  
ATCAAACGCTTTAAATATTTGCCTAGAGAAAGATTAAATATGTGACATGTTTGGTTTAGTTGTTAAAAAGATACTA  
TATATCTTTTTGAAATTCTATATGTGGGTCTTGTATATTGAATGATGAATTTAAAAAGAAAATTGGTGAGACATC  
GATGTGAGATAAAGGAGTAGTAGCATGTCTCTTAGTTTTTAAATCAATTCTCTTCTTTTTATTAATATTTGGTTA  
AACAAAATTGATTATTTTTGAGGCTCCCATCAAACGAGAAGTAATTTAATAATGAGTTCATTAAATATGCTTTAAA  
TAGAATCTCTTTAGTTTACCAAAAAAAGTATTAATAAGAAACACTCTTTAAGAAATTAAGATGACAGAAATAAA  
CAAAAATTTATATATGTATATGTATAGGTATGTTTTAAGTACATATTTATTCTCTTAATTCAATAATCACTTTTT  
CAATAATTGCGGACATTAATAAAGTACACACCAAACAACACCTTAATGCTAACTTGTGGGAGAGGAGATTCCCTCC  
TTTTTCTAGAGTATATTACGGTAAGATCTGTATTTTTGATCCTTCCTTATCCAACGCTCAGTAATTAGAAAAAGAC  
AAAAATTAATTTCTAAAACTAACAATTTTTGGGAAACGCTCATCGACTCTTGTTTTCTTATAATTATTGGTCCG  
GCGTATTATTGTATCATCTTGTTAGAAGATAATTTTTTTATTTTTTTATTTTTTTCTGTGTCTTTCGGAAGAGCC  
ATCAAATTAGCCAACCTCAAAAGTCAACTTGAAGAATAAGAGAATCCTGAGCACATGCTTCACAATTTTTTTTTT  
TTGTAATTGTTGGATAGATATCAAGCAAGCCTATCGAATAAAATTGGACCGATTGGATTGAGATATTTTACAAT  
TTCAGAGAATTTTTTTTTTATCTATATATTTATTACAATGGCTGATGGCAAACAATAGTAAAGTGATATGATTGGG  
CTGTCATACCTTAATTGTACAGCATTATGGGGCCGTCTTTGTTTCTAGTCAATGCCTATGGTATGTTTATGATGT  
ATTTTTTGTTTTGGTTATAAAAAATGTTTTTAATGTGACATACAAGTTAAAGATATTTTATATTTTATTTAACTG  
TTTTATGCTGAAAATTGTTTGATAATGTTCTGATTTTTTTATAAAAGAATGAAAGTGGGTTAACAAACATGCAGA  
TAGGCATCATTCCCTGTGTCAATTATATGTAATTTTTTTTTTGGAGGAAAGTCTTTAGGGTTTATTTATTTATT  
TTTGAGTGCTTTTTACGTTGCTGAAGTGAATTTAACTTTTTTTTTTTTATTATTTATTTATTTAAAGGG  
AGGGGGGGGGGGAGGGGGAGAATTTAACTTGTGTGTAAAGGTTTATGTTTGTAAATGATTTTTCATGGGTATT  
TCTTATTTTTTGGCTTGAAAAAATAAATTTGGGTGGATTTGATAAACGTTTTTTGAGTTTTATTTATTTATTTTAA  
ATAATAATAAAAAGTGATTAATACGATATAAAAAGTTAAATTGACAATAATAATAAATAATGATCGATAAAAATAT  
AAAAAGTTAAATTAATTTTTTTTAGAGAAATAAGATGAGGGGAGGTAAAGATGTTGCCAAACCATGCCTTTATATT  
TTTAAAAGTGTTTTACATTTTGAGTAATTTGTTAGTGTTTTACTTGTTAAGAAAAAATGATCTTAGAAATTACC  
AATATTTAGGACACTCTGACTAACTTAATTTTAATGAAAGACGGGTTTGGCATATTTAGGACACTGAGATGAACA  
ATTTTGTTTTTTAGTAAATAAAGTTAGTAATAGTGGTGGGTTAATTTGCAGCTTGGAGCAGAGTTTGTGGGAACTT  
TCATCCTGATATTTATGGCGACAGCAGGACCCATTGTGAACCAAAAAGTACAATGGAGCGGAGTCACTGATCGGAA  
ATGCGGCATGTGCGGGGCTGGCAGTGATGGTCTGATTCTGTGACCGGTACATATCGGGCGCACACCTAAACC  
CATCCCTCACCATTGCGTTTGTCTACACTGCGCCACTTCCCTTGGCTCCAGGTGCCCCGCTACATCGCGGCACAGG  
TTTCAGGATCCATTTGTGCTTCCCTCGCTCTCAAGGGAGTTTTCCATCCCTACATGTCCGGCGGTGTACGGTTC  
CTTCCGTAAGTGAAGGCCAGGCTTTTGCACGAGTTTCAATATCACTTTTAATCTCCTTTTTGTGTGTCACCGCCG  
TCGCCACTGATACCCGAGCGGTACGTATATATATATATATATGACTGTTATCTAATCTTCTTCCATAAAATTTTTT  
TTAAAAAATATTCTTCCATCATCTTTCTTTTCTCATGGCCGGGTTTCATCTTTCTAGGTGGGAGAGTTGGCGGGTA  
TAGCAGTTGGAGCTACCGTTTTGGTCAACATTCTTGTTGCCGGGTGAGTAACCTTCTTTTCTTCTCGATCGTGT  
TATGGTTTTTTTTTTTTTTTTTAATAATATTATTTAGTAAATTGTAAGGCTGATTTACACCGTTAATAATATAACATT  
CGTTTAAACAGTCTTTTTTTTTTTTTAATAGGCTAACATAATTAAAGCTTAGTTTTTTTTGGCCAGATAAAAAAATTA  
AAATATATATAGTTTTAGGGTTTTTTGTAGTCCGTAGAAACGTGTCCCCCTCGCCCTCCACTTCTTCTGTATTAC  
AGTGTAATAGTGTATTGTAGGGTCAAAAGTTTTAAAGCGACTAAATAAGTTCAGCAACTCTGTTAGCAATTGTATA  
GGTGGTAGAGGGAAAGAGGCCGGTGGCAATTTTGTGATGCATTTTACTACTTTTACACCCAAAAATTGAAAAA  
AGAAAAAAGAAAAGGAAAAAAGGAATGTTTGCAATAATTGTTAGATTTGAACGTGGCAGGCCATCATCTGGTG  
GTTCAATGAATCCCGTGCGAACTCTGGGCCCCGCAATTGCAGCAGGAACTACAAGTCATTGTGGATATACCTGG  
TGGCGCCACACTTGGGGCCCTCACCGGTGCAGGAGTCTATACAGCGGTGAAGCTCCGAGAAGACGAGGTTGAAG  
CACCGCCGAGGTGAGGAGCTTCCGTCGCTAGGGGACGCGTGCCAAAGGGCCTAAAAATTGCCGCTGCCCTTATA  
ATTTCTGTCGCTTTTGTGTTTGGACTTTAGCTTTATGACATGACAGCTTGAAAGGTAATATAATAATTAGAAGAA  
TAAAAAAGGTGTGGAGGAGATTTGACGATGTGACCGAAAGTCTACGCCCTACAATTTGAGTTGTATAAAAAAGTA  
TGGTGTGTTGTCTCATCTCACGGGGTCTTCTCTCCTTTTTGGATGGAAGTCTCCTGTGATGTTAAATAAGCGCTTTG  
CTATGAAACCAAGCAGCTTGTAATGATGTGTGTAGTGTGTACCCTTTGCTTTAATATGAAAGACACTGATGTGTG  
TAGTGCGTTTTGTAACTTTTGCTAATCAGTGAAAGTGCATGAGCACGAATGCCTTGTTTTATTTATGTTTGGTTGA

TCCCACCTTTCTGCATTATAATACTCTTCACTTCTGTCTTTTATGCATTGCAACTTCGTATCCAGTTGGGCACAAG  
CAAACTTGGTTTGACCCATTTACTCAAAAGAGTAATTTGAGGTGTTTGAATTGGGCCAACAGGAAGTTTAGC  
CCACTAATAATGGCAAGCGGTCTTGAATCAAAAGTGTGAATCAAAAGAGTGTAATTCAGTGACAGACTATTG  
CAAGTAATAAATTATTAATAAATATGGTAAATATTAAGTAAAAATTTTATTATCGTGCAAAAAAGTTTGAATTGT  
TTTTTCACCAAAAGGTGGAGCACATTAAAGTAAATAAACTAAAGTAATAAAAATAGAGTTGGAGAAAAAGTAATG  
GAAAAATATTA

>**BpeNIP5;1**

**ATG**TACTATTTTTTTTTTGGAGGAAAGTCTTTAGGGTTTATTTATTTATTTTGGAGTGCTTTTTACCTTGGAGCA  
GAGTTTGTGGGAACCTTTCATCCTGATATTTATGGCGACAGCAGGACCCATTGTGAACCAAAAGTACAATGGAGCG  
GAGTCACTGATCGGAAATGCGGCATGTGCGGGCTGGCAGTGATGGTCGTGATTCTGTGACCGGTCACATATCG  
GGCGCACACCTAAACCCATCCCTCACCATTGCGTTTGTACTACTGCGCCACTTCCCTTGGCTCCAGGTGCCCCGCC  
TACATCGCGGCACAGGTTTTCAGGATCCATTTGTGCTTCCCTCGCTCTCAAGGGAGTTTTCATCCCTACATGTCC  
GGCGGTGTTACGGTTTCCCTCCGTAAGGAGGCTTTTGCAGTTCATTATCACTTTTAATCTCCTT  
TTTGTGTGTCACCGCCGTGCGCACTGATACCCGAGCGGTGGGAGAGTTGGCGGGTATAGCAGTTGGAGCTACCGTT  
TTGGTCAACATTCTTGTGTCGGGGCCATCATCTGGTGGTTCAATGAATCCCGTGCGAACTCTGGGCCCCGCAATT  
GCAGCAGGAACTACAAGTCATTGTGGATATACCTGGTGGCGCCACACTTGGGGCCCTCACCAGGTGCAGGAGTC  
TATACAGCGGTGAAGCTCCGAGAAGACGAGGTTGAAGCACCAGCGGCAGGTGAGGAGCTTCCGTGCG**TAG**

>**BpeNIP5;1**

MYFFFGKSLGFIYLFSLAFYLGAEFVGTFILIFMATAGPIVNQKYNGAESLIGNAACAGLAVMVVILSTGHIS  
GAHLNPSLTIAFATLRHFPWLQVPAYIAAQVSGSICASFALKGVFHPYMSGGVTVPSVTEGQAFALFIIITFNLL  
FVVTAVATDTRAVGELAGIAVGATVLVNILVAGPSSGSGSMNPVRTLGPAIAAGNYKSLWIYLVAPTILGALTGAGV  
YTAVKLREDEVEAPRQVRSFRR\*

## **BpeNIP5;2**

>**FXXK01001085.1**:70352-70951 *Betula pendula* genome assembly, contig:

Contig1084, whole genome shotgun sequence

>**Bpev01.c1084.g0010.m0001**

Chr *Bpe*\_Chr6 19,692,291-19,696,739 (1) ::

join(19692291..19692298,19692422..19692527,19694190..19694609,19695465..196  
95526,19696562..19696739)

>**BpeNIP5;2**

AGCGGATAATAACCGCATTTAATAACTGCAATAACCACGCAG**ATG**TAGTTAGTACTAATATGATGCAGATACCTA  
AAACTGATATTTGTATTTTGCAAATGCAGCTACAAATATTACAAATAACTGCATCTACATATACCCCTAACTT  
TAACATCCCTTATCTTAACCCTAATTTAGCTCGTGAGTCAGCCCATGGTAATGGCATGGGCTATAGCATGCATAC  
**CAATG**ATATTGGGTCTCAATATCTTTGCAAGCATGGATCAATGCCTTCTGATTGAAATCATAAAAGTTTAAAAAT  
TTATTTTTCATTTTGAATGACATGCATAACTCAACG**GTTT**AGTTTCATAACATGTTACATTCAAGGCATGGGTTTAA  
ACCTTCTTAAATACAACCTTGACATTTATTTTAAAAAATAAATGCTAGATACTCCAATATATGAAAAGTTTCGATC  
TAGCTTTTATTTTATTTTATTTTATTATTGTTTTTAATATTTTGGTTGAATGAGCAGGTCAACTTGAATGGGCT  
TCGTTTGAGTTTAAATGGAATGCTGCCTCCCTCTAACCTCCTTCCCGGTCCACTCAGTTGTATATATATATATATA  
TATTTCCATTTGTTGCTTCTGCTTCTTGACAGACACATCATTCGCATCATCCAGGCCAGGAAACCAGCTTCCGAT  
CAATGCCGCGATGCAAGTGCTTTGGCGATCTTTCTGCACCTGATTTTTCTCTCATCCGAAAGGTACTCTCTCTCA  
AACCAGTTAATTATAAACCGTGTAGCTTTTTTCTCCTTATTTTTTTTTTCTTAAATCCTTGGACTTGAAATTATA  
TTTAGAATGGTGCAGTGACACCCTATTCCTTCCCTCCCTTCGTTGTTGTAGATTCTCCTTCATTTCCCTGTAACTT  
ATATATATATATATATTCTTTCTTTTGTGTTGTTCTCTCCATTTGTCCAAAAAAAAAAAAAAAAATTCATATGAGGCCA  
TTATTTATGCAAACTGTGATTCCATAAGTACAAATATTTTTTTATTACGCTGAATGACTATTCCATTAAAAAAAA  
AAAAATTTTATTAATAAATAAAGAATGTAAATGATTAACCTTAAATAGCCATTTTATAGCCATAAAGAAT  
GACTATTTCAAGTATTCAAATATATGTATTTGTTAACACCAATGCTAGTTTATTCTATTATTAATTCATTTTAAATA  
AATGTTATTCATTTTTCTAATAGAAAAACCATTACGTGTACAAAACATACTATTATTCAAAAAATGATTTTTGTGA  
AACTTTCTGTGGCTAAATCAACTCAGTAGCATTGTATGAATGTTTATTGAAAAATCAATATAGTATGAACCCAAT  
TTTTGCTTAAACATTTAGTACTAAATGTTTATTTGGGTTTTTTTAAAAATATTTAGGGGACTTTTGGATTAAAA  
TTTTGGCCTCTAGAGTTTCTGTCCATACACAAATTCATCCCAAATCAGTCTTTGAAAATTCGTTTTGTTTAA  
AAATAATTACCACAATACATATATTTCGGTTTTTGGCCCTCATTAATAATTAGACTGGACCATTCAATTAATGCTTTA  
CCCCTCCCAATAAATTATTTAGGAAAAATACATTTAACCCGCCCATGAAGTTTGATTGTTATTTTAATTTTGT  
CAAATGTTTAAAAATTGATAATGTACTTTTATCAAAATTTCTAAATTTTGTAAATGTAGTTTCATCAGTTAGACAATT  
CCATCTTCTTTGACGGAAAAATATCTCACATACCAGTAACTCTTTTGAAAAATTCGTCTTTTCTGAAGAAATTGT  
CTAATGAATGAGATACATTGTAAATTCAAAAATTTAGTGAAAGTACATTATTATTTTTTAAATATCGGAGGCCAA  
AATTAAAAAACAGGGTCAAAGTTTAAAGGGTTAAATGTAGTTTTTTCAATTATTTAAGTAGGATGAGCCATTAT  
ATTCCTCTAAGAGCCTGTTAGACATTAGCAGCAGCTTCATTAAATTTCAATCAATTTCTAGTGATAGGAAAAAC  
TGTTAAAAAATAACAAAAGTCCATGCAGCAGCTTCCTTAAGTGTTCTTAACTATAGAAACATCTAGGGAACA

AAAAGTGGTTATCTTAGCATTATTTTAAATATAAAACAACCTTTCTCTCTCCTTTCTCTTTCTTTTACCATTGTGTTA  
AAACAATATTTAAATAATTTCTCTTTCTCTCTCTTTCTTCTAACAATTTAATTTAAATTATATTTAATTCATATA  
GTGAAAGATAAAGGGAAGCTGCTATGCAGTGCATTTATATAGGAAACTAAAAATAATTTTGTGTTCTTACATTAA  
AAAAAATTTAAGGAAAGCTGCTGTTAAATGCTCTTAGGGATTGAAGACATACTATTTGTTCTAATGCATGCAGC  
TTGGAGCGGAATTTGTTGGAACATTCATCATGGTATTCTCAGCAGCAGCAGCACCGATTGTGAACGAAAAGTACC  
AAGGAGCAGAGACGCTGATTGGGAGTGCGGCTTGCGCAGGGCTTGCTGTGATGGCCATGGTTCTCTCTACCGGCC  
ACATCTCGGGAGCGCACTTCAACCCATCCGTCACCATAGCATTGCGGGCGCTGCGTCACTTCCCGTGGGTCCAAG  
TGCCGGGCTATTTAGTAGCGCAGGTTTCTGCCTCCATTTGTGCTGCCTTCACTCTCAAGGAGTATTCATCCAT  
TCATGTCAAGGTGGAGTTACCGTTCCGGCGGTAGGCATTGGCCAGGCTTTTGCCTCGAGTTCATTGTTACTTTCA  
CTCTCTTGTGTTTGTATCACCGCTGTTGCAACTGATACCTGTGCAATATGTATTATTGATCACATTTTGTGATTTT  
CCATATACTACTCATTTGTTATTATTCACTGAGTTTCACGTAAATTACTTATTAGAGAAAACCTCACTTATCCTA  
ATGTTTCGGCATTTTGTAAATCTACTTTTGAAGTTTAAAAAGTTAGAATGCCGGCTGCCATCTATTTAAAACTT  
TGTAATGTCACCTCTCCGTCAAGATTTTGTACTACATCTTAACCGAGAATGTCAAAATCCCCAAAATAAAAAA  
TAGAACACATTCAAGCGTGGGTCCGATGATCCAAGGCCATTGAGCTTTTCTTTTTTCTTTTGTGTTTAAATTT  
TTAATTTTTTAAATTAAGAGTAGTTTTATTTTTTTATTAATTTTATAGGAGTATAAAGGACATTTTCATCACTTTAT  
CCTCGGATTAATTTAATTATAAGAGTAATTATATATGTCTACCAACATATCTATCTTGTGTCAACAAAAAATGAC  
GTGGCTTTGAAAATCACTGTTGAATTTATAATGGATAATTATTGATTTTGTATCCAATATTAATTTAAATACTA  
CATCATTTTTTGTGACACAATATAGACATAGAAGTTGACTTGTACGTATCATTACTCTAACCATAAATCCTAAT  
GTATGATAGGGTTGACAAATACAAAGTTTGAACCATGTCAACCAATATTTAACTTTAACTTTAAAGATACG  
ATTGTAAAAGTGTGAAATATCGGGATAATTAAGTGAAGTTTCCCTGAAACTTATTTGAAGTTAAATTAATGG  
CCTTGGAACCGATGCAATAGGTGTACCGAGGTTCTTCTAATATTTCTCGGGGCTAATTAAGTGTTCATGGCAGG  
TGGGAGAGTTTCGAGGAATAGCAATTGGAGGTAAGTATGCTCAACATTCTTGTGGCAGGTTAGTAACTAGTA  
TTTTCTTTTATCATTCATTCTTTATTTAATAAAGCCAATTCAATTCGTCATTTTCTCCTTTTCGAGTGATAGTATCA  
TCTGGTGAATACCAGGACTGGACAGGACCAGCTTCTAGAATAAAATTTCTGGCTCGCAATATATGAAGTGAAGT  
ATTCCTGACCATGTAATTTCTTAAACAGCAAGCATGTGACATTATCATTATGCCCTTTATATTAGAAAAAATAAA  
TAAATGAAAAATCCTCATAATCTCCATGGTTCGTGGAGGGTGGCCATGGAGTTAGCTCTATTTTGGCCCATAGAGG  
TCATCTCCATGTTTCATGGCCATGAAGGGTGACCTCTATGGCTGTAGAGGTCCATGGCTACGGAGGTTGGATAAGG  
TTTTTTCTTTTTTTTTTTGTGTCATATTAATTAGGAGGCATATATAATTACAATTTACATGCATGCCCTTCTGTTAT  
CAATTTAGTGTAGCAAAAGAATAGTTGTTGACATGTTGTATATTGCAACATGGATAGCCTGAGGTAATGAAATTA  
CAAAAAAGAAAAAATTGAAAACGTTTTTAAACAAAATCGACCAAACTACAAAGTGATCGGTTTTGTTTGATA  
ATCTTTTAAAGGTTTGCATTTTCTTATTTTGAAGAGAGAAATATTATTAACAAAAACATATATAAAACAA  
TAAAATTACTTTTATCTTCACTCATATCGCATGCAAAAGTAAAAGACACCCCTCTAAAAGGCAATAGTACCA  
AACAAATCTTTATGTTTTCTTTTTTATTTTCAATTGACAAGTTATTATATATTGTCATATAGAGTTTTTTCATATGA  
TCCGCTCTCTTTTTCTCTTAATATATTTGATTATATATTTCTACAGTCTTGTATTATATATAAGCCACTCTTTGTT  
TTTTTTAACGAATATGATTAATCTGTATTAAGCTGCTTAATGACGTTGATTACTAAACAATATAATAAATGGAAT  
ACAAAGAAGATATATATAGTGATTTCTTCTGTTGTTGACATAGCAGACAACGACCGGCGCATCAATGAATCCCG  
TAAGAACAATTGGGCCAGCCATCGCAGCAGGAACCTATAAAGGATTTTGGATATATATGGTGGCACCTATACTTG  
GGGCTTGGCCGGTGCAGGTACCTACACCTTCGTGAAGCTCGCAGAGGATGGCGTTGAAGGCCAGGATAAC**TAG**C  
TAGGAGCTTAAAGTTAGCTCTAATGAAGATAAACATTAGATTTGTTGCAATTACGAGTGATGCTTAAAGATGAACA  
GTCAGATATGACACCTTGAAAATGTTCTGATAATGTCTGATCATATCGTTAATTAACGTAAATAATATGGTGATT  
GCTTTTCTTGCATCTTGCTTGTTAAAAACATACATATGAATGCTAGATCATATTATAAATACGCATATATATTGT  
GAATATATATGATCTCATGTTACATAAAATTAATTAATACCTACCTTAAGGATTTTCATGAAAAACCTACTTCAA  
TGCAGTGGAAAAAATAAATCATCGGTTGCTTTTCTGTCACTCCTCTCGATTATAACATCATAAGAACTTGTGATT  
GGTGGTTTACCATTGCAAGCAAACCACACATTTCTCCTACAATAAAAGAACTCTAGAATATTTTGTGATTACGATT  
TCAAATGTGTTTTCTGTTTGTGATTGAAATTTCTTTATATATAATAAAAA

>**BpeNIP5 ; 2**

**ATG**ATATTGGGTCTCAATATCTTTGCAAGCATGGATCAATGCCTTCTGATTGAAATCATAAAAGTTTTAAAAATTT  
ATTTTCATTTTGAATGACATGCATAACTCAACGCTTGGAGCGGAATTTGTTGGAACATTCATCATGGTATTCTCA  
GCAGCAGCAGCACCGATTGTGAACGAAAAGTACCAAGGAGCAGAGACGCTGATTGGGAGTGGCGCTTGCGCAGGG  
CTTGCTGTGATGGCCATGGTTCTCTCTACCGGCCACATCTCGGGAGCGCACTTCAACCCATCCGTCACCATAGCA  
TTTGCGGCGCTGCGTCACTTCCCGTGGGTCCAAGTGCCGGGCTATTTAGTAGCGCAGGTTTCTGCCTCCATTTGT  
GCTGCCTTCACTCTCAAGGGAGTATTCCATCCATTCATGTCAAGGTGGAGTTACCGTTCCGGCGGTAGGCATTGGC  
CAGGCTTTTGCCTCGAGTTCATTGTTACTTTCACTCTCTTGTGTTTGTATCACCGCTGTTGCAACTGATACCTGT  
GCAGTGGGAGAGTTTCGAGGAATAGCAATTGGAGGTAAGTATGCTCAACATTCTTGTGGCAGGGACAACGACC  
GGCGCATCAATGAATCCCGTAAGAACAATTGGGCCAGCCATCGCAGCAGGAACCTATAAAGGATTTTGGATATAT  
ATGGTGGCACCTATACTTGGGGCTTGGCCGGTGCAGGTACCTACACCTTCGTGAAGCTCGCAGAGGATGGCGTT  
GAAGGCCAGGATAAC**TAG**

>**BpeNIP5 ; 2**

MILGLNIFASMDQCLLIEIIKVLKFIIFILNDMHNSTLGAEFVGTFFIMVFSAAAAPIVNEKYQGAETLIGSAACAG  
LAVMAMVLSTGHISGAHFNPSTVIAFAALRHFPWQVPGYLVAQVSASICAFTLKGVFHPFMSGGVTVPAVGIG  
QAFALEFIVTFTLLFVITAVATDTCVGEFAGIAIGGTVMNLVAGTTTGASMNVPVRTIGPAIAAGTYKGFWIY  
MVAPILGALAGAGTYTFVKLAEDGVEGQDN\*

## BpeNIP6;1

>FXXK01000045.1:935000-945000 *Betula pendula* genome assembly, contig:

Contig44, whole genome shotgun sequence

>Bpev01.c0044.g0051.m0001

Bpe\_Chr5 8,366,764-8,370,948 (1) ::

join(8366764..8366994,8367790..8368014,8368159..8368353,8369537..8369598,8370744..8370948)

## >BpeNIP6;1

TGGCTGGTTTGTAGTTTGGCTGCTCTTGTACTTTACCAAAAAAAAAAAAAAAAAAATCTGCCATCACCCAAGTATGA  
CTTCCTTCCACCTGCAACAATTTACCTACCACGCAATACACGCTCATCCAAAGATTGCTTTAATATCTAGAGGA  
AAGGGTTAAAAATGTTATTACTAGCTAATTTACCTACCATGACTGCATCCAAGGGGCGGACCTACTTGTAGGGT  
GGGAAAAATTTTAAATTCCTTTTAAAGTATACAGCTTTTATAAATTTGTTTCCTTAAATTTATATTTATGGCCC  
TTTTTAAAAACATTTCTTTTAAATTTACCCCATCTTCCAACATAGGAAACCAAAAAATTTCTTGTTTTTTTACAT  
GTCTAAGCAAAGTAGGAAATTTGTGTATTCAAATGAATTTCTTTTTTTTGATATCTTTTAAAAATACTTTATAA  
ACAAATAACTTTTGTATATAGTAATGAGTTAAGATTTAATATGAAATTAACACTACTAAAAAAGAGTAGAGCTG  
GGCGTCCGTTTTCTATTTTAAAAAAAAAATAAAAAATTAAAAAAATGCTTTTTTCTATTATAAAAAAGGCTTAAAC  
TTGTCCAATTCTCATTTTGTTTTTTCTAAGGTTATGAAATGGGGATGAAATAAGCCTGAACCTGTTTTTGTTTAA  
AAAAATATTTTTCTTATTTTTTATCTCAATAAAAAATAAGAAAAAATATTTTTTTAACAAAAACAGGTTCAAG  
CTTATTTTCACTCCCATTTTCATAACCTTGAAAAAACAAAATGAGAATTGAACAAGTTTAAAGCCGTTTATAATAG  
AAAAAGCATTTTATTTTTTTTATTTTTTTTTTTTCAATTAACCGGACGCTAGGCGTCCGCTGTGCGGACGCC  
TAGCAGGACTCCTAAAAAATTACCTGTATGATGCATCTTTTTTAGTGCTCGTGCAAGATGCGTCGAAGAAAAGGC  
GTCCGTAACAAAATAAGAGTTGGTATAATATTTATTTTTTGTAGTGTAATTTAAGACTTTTTCTAGTTTTATATA  
ATATAAACTCGCACAAACACATATGAAAAAAGACTATATGTACATCTCTTGTGCTTAAATATTTATATAAGT  
TAGTTCCCCACAGCACCGATCCTCATTTGGACCTGATTGCATCTCTCTATTCTTTTATAGGCACACAGATCGACA  
CACTTAAATAGGGACTTCATTATTGGGAGAAGACATTGAATAGAAAAAATTGAAACAAAAAGAAAAGTA  
GGATCCTTCTGTAGCATTGACAGGAAATCCATAATTCATGTCCCACGTTAAATCCTCTTTCCAAAAACCAAAAT  
TCGATCAAGACTCTCTGCAATGTCCACCACCCACTTTCTCATCTCCAGCACTTCCAACCATTAACCTTTCTTT  
TCTCTTTTTTCACTTGTGATTCCCTAAGTCAACCACCTAGTCACTATAAATATCAGACACCTCAGTACTCTCTTC  
AAAGCAAAGGGACAAAGAAGTGGAATCAAAATTCAAAAGCTTCTCTCTCTTCTCGAGCTTTGTTTTGTTTTTG  
TTTGTATTATTTAATCATTTTTCAGTTTTGCTTTGGAGTG**ATG**GAAAAATGAGGAAGTTCATCAGCACCTTCAAC  
GCCTGCAACACCAAGGAGCTCCAGGAGCCCCACTCTTTGGTGGGTTCAAGGCAGAGAGAAGTGGGAATGGTAGAAG  
ATCCCTTCTCAAGAAGTCGCAAGTGCTTCAGTTGATCAAGAATGGGCCCTTGGGAAGAAGCACCTTACCCAA  
ACTCTCTTGCTCTTTGCCACCTCCTCCCATTCCACTTGCAAAAAAG**GTACGCTATGGATACAAAATTTCAAAACAA**  
**TTTGTTGCCTTCCACGTGGATCTCATTTATTCGAACAGGTTTAAATTAAATAGTCAAAAAATTTATTTGGACAAATA**  
**AATTTTAGGTTGACACTTTTACAATATGTCATCCAAATTGTTGAATGAGATATGTTAGAGGTAAATCTTATAGTC**  
**TTCTCCTGTCCAACCTCCGATGGATCGCACAAATTTCAATTGTTAAAGTATTGATTAAAGTGGTTAAATTTACATTTT**  
**TCTATCAGCTTAAGCTTTTAACTTAAGCTTTTGGAGACAAGTAGTGGTTTAACATGATATCAGAGGCAAAGGTCCT**  
**GAGTTTGAACCTTGACTCCGTCATTTACCTCCATTTTAAATTAATATTTACGCTGTTGGGCCCTCATCTATTA**  
**GGGAGTTTGAATTCACATGTGAGGGGGAGCGTTAAAGTATTGATTAAATGGTTAAATTTACCTCTTTCTATCAGC**  
**TTAAGTTTTTAACTTAAGCTTTTGGGACAAGTAGTGGTTTAAATATCAAGAATAAATTTATAAAGTTAAAAAGAA**  
**TTATTTCTCTTGTGTAATATGTAAATTTACAAATTTAATGGTAAATTTGCAAGAGTTAACCGGAGATGACGATC**  
**AGTTTGAAGAAAGAACCTATGTCAAAGCTCAAATCAAACCTGACCCACGTTTCTTTATGTGTTATTTTCATG**  
**GGTCATTTTATGTCAAAAAAGGAAAACGAAAACCTAACCCATATTTCAATTACGGCTTATTGTTACATCTTGA**  
**TGCCAAAATTAATCAGGTTGGAGCTGAGTTCTATAGGCACCTCTCATCTGATCTTTGCTGGGACAGCCACGGCCAT**  
**GGTGAACCAAAAGACACATGGCTCAGAAACCTCCTTGGCTGCGCTGCTTCATCTGGCCTTGTCTGTTATGGTTGT**  
**CATTCTCTCGACCGGACATATCTCTGGGGCCCATCTCAACCCAGCTCTCACCATTTGCCCTTTGCTGCCCTAAAGCA**  
**CTTCCCATGGAACATGTAAAAAATTTCAATTTGCCCTTTTCTTGCAATAATTCTAAAGAGTAATGTTATAGGAGA**  
**CTGTTATACAATTTTACTGTTACGTTGTTCTAATCGTATATTAATTTACTAAATAGTGTTTTTTATTTTTATATT**  
**AATTTGGCAGGTGCCTATGTATATTGGAGCACAGGTTGTGGCATCTTTTTGCGCTGCATTTGCACTGAAGGGGAT**  
**TTTCCACCCAATAAATGGGAGGGGGAGTCATGTTTCCCTTCCGGGTCATATGGCCAAGCTTTTGCTTTGGAGTTCAT**  
**AATTAGTTTCAACCTCATGTTTGTGCTCACAGCCGTGGCCACCGACACAAGAGCTGTACGTGATTTCTATCAACC**  
**TTTTAGACTTTTGTGTCATGATCTTGAGAAAAGAACAGAGTAAAGAAATTTTGCAGTATATTTTTTTTTTCAT**  
**GTACCACATTTTTATCTCAGGCTCATTTAATTAGATTAGTCTTTATTTAAAGCAATATTTAATAGTTGATAAACA**  
**CTATTATATCAGTTCATTAAAAATTAAAAAAATAGAGTGCAATATATAATATTTCTTTTTTTAAATAATATATCA**  
**GTTTCATGACATTTGACTAGCCAAATTTTAGGCCCGATGCATCCTTAAAACTAAAAGAAATAAATATACAACAAA**  
**TTAATCAGAATAACTTCTTCAACAAATTAATCCTCTCATTTTTTTTACCATGTCAAACCTGCTATTGAAGAGAC**  
**GTTTGCATATAAAAAACAAAAGAGACGATGTATGATCAATGACTAAACAGTCATTTTCTTTTCTATTGAAAAA**  
**TAGAAGACATCTACAGATCACATGCACCTTAAGATTGTGGTTTCCCTCATAAGATAATATTTCTCCTCCTTTTTT**  
**TCTTTTTTTTTCTTTTTTTTTTTTTTTTTTAAAAAACAATTTTTTGTATCTTTAAGCTCACTTCCCAGGGATTT**  
**TCCACGAGAGTTACTTCTCTTTTTTAAAAAATTTGTTTACAAAGTCAAAGAGACAAGAGTCGGTAAATACCTGGC**  
**AGCATGCAAAGTTCCATTTCCCATAAATATAATAAAATAGTACAAGTTGTCGATTCTTTTTTTTTTTTTTTTTT**

TCGTATATTACAAGTTATCGATTTCACTAGGCTCCAATATTCAAGGTAGAAAACATCCAGAGAAATAAAATAAAA  
TAAGGAATTAACACGTAACCTATAATATTCAGTTTATATATCTAATATTAATTATGAGCACCTCATAATAATTCAA  
AGCTAAGCACTTTTTCCAAAGTGCCTATCTTCAAAATCAGAACAAATTAAGGAATAATTAAGGAAGAAATTAATTT  
TCGATAATTGGCTGGTACATATATAAAGTCTTAACTGGATATATATATAGTAGCCTGACGAACTATTTTGCGCAC  
TTTACTGAAACCAGGGTATTCTTAAATTTTTTGCATTTTGCAAAGAAATTAAGGGGGATGCACAGAGTGAACAT  
AACGTGACACTAATGATAAAATATTCTGCATCATGCAGGTGGGAGAGTTGGCGGGAATCGCGGTGGAGCAACGG  
TCATGCTCAACATCCTCATAGCCGGGTACGTATGTCAGAACTCCACTTGCTCTCAACTGAAGGTCTTTGAAACA  
AATCATTATGAGTAAGAAGCAAACCACATAACATGGCTCATGTCCCCCGACCAGGATTCCAAGTAATTTGTTGT  
CATGACCCATGGTCATGTCAGAGAGTTTCAATAAAGTTTATTTGTCCAATTTCTTGAGATTTATTTAGAGCATTA  
ACAGCAGCTTCTCTTAAATTTTTATTCTCTTTCTAGTGTAGGAAAACTGTTAAAAAACACAAAAAGTCCCTG  
CAGCAGCTTTCTAAGTGTTCCTAACTATAGAAACACCAAGGGAACCACTTTTGGTTCCCTTAGCATTTATTA  
AATATAAAAACTTTCTCTCTCTCTACCATTTGTTTAAACAATATTTAAATGATTGTCTTTCTCTCTTTTT  
CTTCTAACATTTAATTTAAATAGTATTTAATTCATGTAGGGAAAGATGAAGGGAAGCTGCTGTAGAGTGCATTTA  
ACTAGGGAACATAAAAAATGGTTTTGTTTTCTACATTAAAGAAAAGCTTAAGGGAAGCTGCTGCTAATGCTCTTAG  
ACATATAAACTTTTATAGGAACCTCTCTTATATTTACTATAAGAATTACTAATAATCTCTACAACAAAAATGTTAAA  
GATTTCTATACCATGTCCCTCTTTGTATCTTAAAGATTTTTTAAAGACAAAGCATGTTGACTAGTAGCTAGGCTT  
AACAGAAATTTAAATGTAAAAGTTTTGCCAATCGATCAGCTCACTCAAATGGCACTTTCTCCCATATAAGAGGAT  
GAGGTCTGAAATTTAGGACTATTGAATGTATGTAAACTTACCAACAAAATAATTTTTTTTTTCTATTCTACCAA  
CAAAAGTAGGTGCTCTGTAAATGAAATTAACCAAGATGGGTATGGGGATTGGGAACATAAACACATAAAC  
CATCATTTCAAAAAGTAGGTGCTCTGTAAATTTATGCTACATTTGTTGATGCTTTTTGTTGATTTTATTTT  
TTTTTTTTTAAAAAATATTCTTATGTGACATAAAAGGAGAAATATTTTTGAGTGTATTATGTTTAAAGTTGTTGT  
TAATACTCTAAATTTTATATGGTATTGTTTTGTGCTATCTTATAGGCCAACAAACCGGAGCTTCAATGAATCCAGT  
GAGAACACTAGGGCCAGCCGTTGCTGCAACAACATAAAGCAATATGGGTCTACCTCACTGCTCCCATCCTTGG  
GGCACTGTGTGGGGCAGGAATCTACTCTGCCGTCAAGCTGCCGGAAGAAGATGGTGGCATTCATGAAAAGCCTTC  
AACAACAAGTAGCTTCAGAAGGTGAACCGACCAACACCATCATCGCACCTACATTAATAACATCGAACTCCAACA  
GAATATAATGAAGGTGGATAAAAAATGAGTATGACAACAAGATGAGAGACAATTTAACAATGAGTCTTGTGGGTAC  
ATATATATATCACACTAATAAAATAGAGTAATGCTATTTAGTAGATTGTTATACGATTGTGATACAACCTTGATGA  
CGTGACTTAGATCAGCACATGTAAAAAAGAAATAATATGTTGATTTTCAGTGTCATATCATCTCAATTTAT  
ATGTCAATTGTATAAAAGTCTACTAAATAGCATTACTCAATAAAATATCATCAATTAGCAGTATCAATAATACAT  
ATTTAACAATCAAGCTATAATTTCCCCCATGTAACGGAAAGCTAATTATAGAGTATGAGGATTGAGAGATCACTT  
TCATCTTCAAGTACATATTAATACCAGCACCAGGTAATAGAGATATAGTAGTCTAAATAGGTGGAAAACAAAAATC  
TCAGGTTTTTAATGCATTATCATTCAGGTCTATCTTTTCTTTCCACTGTATTGTATCTCTTTTGTATCGTTTAA  
AAAATGCATGAACATTTAAGATTGTATCTTTATGTGATATTTTCTCTTTTATGAATCTTTGAGCTCATTTGTGC  
AAGGACCACAACAATATAAAGATGGTTGGGAATCAGGTTTACAACTTCTCTCATCTCAACTAATCACTAGTAAAG  
ACTAGCTAAAATGAAATGATTGAATCAGGCTTTTAAAGCAGCAATACAATCAGTTTGCTTTTCCATTTTGTGTTTCA

>BpeNIP6;1

ATGAAAAATGAGGAAGTTCCATCAGCACCTTCAACGCCTGCAACACCAGGGACTCCAGGAGCCCCACTCTTTGGT  
GGGTTCAAGGCAGAGAGAAGTGGGAATGGTAGAAGATCCCTTCTCAAGAACTGCAGCAAGTGCTTCAGTGTGAT  
CAAGAATGGGCCTTGGAAGAAGGCACCTTACCCAACTCTCTTGCTCTTTGCCACCTCCTCCCATTTCCACTTGCA  
AAAAAGGTTGGAGCTGAGTTCATAGGCACTCTCATACTGATCTTTGCTGGGACAGCCACGGCCATGGTGAACCAA  
AAGACACATGGCTCAGAAACCTCCTTGCTGCGCTGCTTCATCTGGCCTTGCTGTTATGGTTGTCAATCTCTCG  
ACCGGACATATCTCTGGGGCCCATCTCAACCCAGCTCTCACCATTGCCTTTGCTGCCCTAAAGCACTTCCCATGG  
AAACATGTGCCTATGTATATTGGAGCACAGGTTGTGGCATCTTTTGTGCTGCATTTGCACTGAAGGGGATTTTC  
CACCCAATAATGGGAGGGGGAGTCACTGTTCCCTTCCGGGTCATATGGCCAAGCTTTTGTCTTTGGAGTTCATAATT  
AGTTTCAACCTCATGTTTGTGTCGTCACAGCCGTGGCCACCGACACAAGAGCTGTGGGAGAGTTGGCGGGGAATCGCG  
GTTGGAGCAACGGTCATGCTCAACATCCTCATAGCCGGGCCAACCAACCGGAGCTTCAATGAATCCAGTGAGAACA  
CTAGGGCCAGCCGTTGCTGCAACAACATAAAGCAATATGGGTCTACCTCACTGCTCCCATCCTTGGGGCACTG  
TGTGGGGCAGGAATCTACTCTGCCGTCAAGCTGCCGGAAGAAGATGGTGGCATTCATGAAAAGCCTTCAACAACA  
AGTAGCTTCAGAAGGTGA

>BpeNIP6;1

MENEEVPSAPSTPATPGTPGAPLFGGFKAERSGNRRSLLKNCSKCFSVDDQEWALEEGTLPKLSCSLPPPIPLA  
KKVGAEFIGTLILIFAGTATAMVNQKTHGSETLLGCAASSGLAVMVVILSTGHISGAHLNPALTI AFAALKHFPW  
KHVPMYIGAQVVASFCAAFALKGIFHPIMGGGVTVPSGSYQAFALFIIISFNLMFVVAVATDTRAVGELAGIA  
VGATVMLNILIAGPTTGASMPVRTLGPAAVANNYKAIWVYLTAPILGALCGAGIYSVKLPEEDGGIHEKPSTT  
SSFRR\*

## BpeNIP7 ; 1

>FXXK01000331.1:40000-47500 *Betula pendula* genome assembly, contig:

Contig330, whole genome shotgun sequence

>Bpev01.c0330.g0006.m0001

Chr Bpe\_Chrl 34,485,381-34,487,761 (1) ::

join(34485381..34485563,34485825..34486049,34486688..34486882,34486981..34487042,34487584..34487761)

## >BpeNIP7 ; 1

AGTTCTTGCTGACTGATGTGAAGTCGCCAGAAGTTCCTATCGGCCATTCCGGGAGGCTGCAATTTCTTAGCCACT  
GCTATGCGCTGCCAAGAATTTCTATTGGCCGCCATCGGGCCGTCGAAAAGCTCATGTTGGCCACTACAAGGTCACC  
AAAAGTTCTTCGCTAGCAATAGTCGCGGGCTGTCAAAAGTTCCTGCCAACTACTGCAGGGCCTTTGAAAAGTTCAT  
GGCGTCAACTGCGGGTTCACCGAATGTTTCATGGCAATTACTTTTTCAGAAGTGTTTTGTGTCTTATTTTTTTGAAA  
ATTATTTTTTTCTTTTAAAAAAGTTTTATAGCTAGTTTTGAAAAGTGAATTAATGGTGAGGGCTACTACATTTAA  
AAATCTGTTTTAAATAACTGGTATTTAAAAAGATCTTTTCTGTTTGAGAAGCGAACATAGTTTTAGAAATGTTAC  
CAAAACAGACCCTAAAATGTTGATGGTACCTAAGGTCTAAAGCCTTCAACCGATATGATACTTTAAAAATATTTTC  
GGTTAATATATTATGTATAATTTTTTTAGCTTTAATTATTTTTTCGAATTTAAATGGTTGAGATTTTCTCACATT  
AATATTTTATTACTTTTTATTATTCCAGTAGTATTTAATTATCACCATAGCATTTATTATATTATATCATATTTCTAA  
ATTAGTAAATACTGATGTGACAAATTTTAATTGTTTAATTTTAAAGTAATGTCTGAGATTTAAGAATTATATATA  
TAAAAATTTTAGAAATTTATAGAGGATCTTGATCCAACCCCTCAACGTACAACCTCTTTCTCTCCTTATATATA  
ACTAGCTTATATACTAACCCCAATTTGATCTAATAATATTATTCATCTGCAAAAAAATAGGTGCACCTCTCAAGA  
AATCAAGAGAAGAACAGGTGGCTGAGGTTTTTTTTTTTTTTTTTCTAAGCAATATATGGAAGGGGAATTATAAAAGGG  
TCTATTGCACTCTTGATCCTAAATTCCTAATAGATAAAATTAAGGAATGAGTGATCAACTGAAAAATGTTTTCAAA  
TACAAAGTAAAAAGCGGCTTATTAAGTAACCTGATATGCTCCAAATTAAGAACTTCTAGTATTAGGGATCTTCAA  
AGCTTCCAACATGAAAGGGAGTGAATTTGTTGTGAATATGTACAATGATGGGAGAGAACATTCAATCTGTGAACA  
AATTGGACTTGTTGATGGCATGGATATTGATGATGAGAGAATTTCTTCAAGCATAGCTGCACAAGGTAATTGCA  
CCTATTAGAGACAATAATTAATTAAGTTGCCAAAAGTGCTGCATGTGCCTCCCTTACAATATTAGCTTTAATAG  
GAGGAAGCCGGTGAGAAGCTGCTAATTAATGATGTTTGTACGGTCCAGATGCGTCCCTTTTCGTTTTTTAAAACC  
AAAACCATCACGCCGTTAACAAAACGGCAACACCAAAAAAGTTAAAGTCTGTGAAAACAAAACATAAAATTGATTTTT  
TTTTTTCTTTCTTCTACGCAACAGAGTCACGCTAATATTACAGCACTCCAATACTCTGTAAGTTTCATAGGCTCT  
CTCTGAATTTGGTTCTATGCTTTTTCTTTTTCAGAAGTGTTCCCTTTTATTAGTTTTTATGGATGCTATAGGTGA  
AGTGTTCCTTTTTGTTTTCTGTGTTGTCTGGAATGTGAGGTATTGTTCTTGGAGTTTATGGTTTTTAGCTTTA  
CTCTATTCATTTTCCATCCAAGGATTTTAAAGACCCATATAGCATCCATATTCCCTAAAAATTAATACAAGGGAAA  
CACTTTTCTAAAGAAGAAAAGCACAGAAACCAAAATCAAAGAGACCCCATCAACTTACAGTTACAGTCTATTGG  
CGTGCTGAATATCAGTTTTCAAGCCTTCAAGCACTTTGAGAGAGTCCTTGAATGAGTTTCTCATTGAAGAAGCAAC  
ATACATCTCCAAATCTTTTCATCAAAACCCCCAAAAATCCTGACTTCTTCTCTTGCTCTCCAAGACGAGCAGAGA  
GTGTTGAAGGTCTGTTTGCCTAGAAAAAAGAAACAAAAGAAACAAAAGAAAAAGCAAGTCTGTTTGGCGTT  
GCCGTTTTGTAAAAGGACGTGTTGGTTTTAAAAGGCAAAAGAATGCATCTGGGCCATACAAAAAATACCGCAAA  
TGTGCGGTAGTTTTCACTACCGCACATAAGCCGGATCCTCATCAGAGTAGCTAAGAATTGTTGTTGCGACAGCAT  
ATATGGCTAGATCGAAGTTTGCCTTATAGAACCCGGGGAGGAGGCTAGGCTAGGGTTCCAAACTTCATTGCTGGA  
GAGGAGTTACGCCAAGGTGAGAGATGGTTCCCTTAATGTAAGGGTTATTTTATTTCAATAAAGATGAAATTTATAGA  
TAAGTTGATTCTTTGAAAATCACATATGATCCATTAATAAAGCTAGCATGATTTGAAACTCACGGTAGTCCGGC  
CCCTTCTTGGAATTAGGTTGTTCTTATTAATTATGAAATCCAAAATTGACCCACAAAAAATAATGTTTTTTTTTT  
TAAAAAAGGGAATAATGTTATTTGTGCATACATATATGTCTCATTATATATATATTATTTACTTAC  
GTTTGTATGTCTGGTCACCTCACCCACTTATATTGTGTTTACTAGTCATGTTATTATGTGCCATCAAGTGTAAC  
TACTTATTGTTAGGATAAGAGCCAGCTTAAAGGAGTAGGTAACTAAGGCCTCCGTTTAAAGCGCCCCATGAAATAG  
TACTGAGCATGCACATTACAAGAAAACAATTGCCAAAACGAAAAAAGGGGTAAAAATGAGTTTCAGCGATA  
ATGTTTTTAAAAAACACTACTAAAAACAAGGATAAAAAACGTCATTAATTATTTGTCAAATTTTCACTGGCGGTGATC  
CGAAACATTCTTCTTGGCACATAAATTATGTGCCAGGAAGTTGCCATACTCGACACCGGGAGACCTAGCATAAG  
CTAAATGTTAGCAATTAATGCGAAAAAGGTTTTCTTGGCGTTTAAATCATCAGTTATCTTAAATAATAAAGTTA  
ATAGAAAATAACAAGGTCAATTATTTAATTGTCATTTTAAATATTCACACTCAAGTATGGACTAAACAACACATA  
ATTTTTTTTTTTCTAATTAATTATTTTAACTAAAGTAAAAAATAAAGTGTACATGTCCAAACTTAAAAATTTGAAGT  
GGTAAAGACCTCCCTTCTTTTTAAAAAAGTTACATTGCCAAGAAAAAGAAATATGTAGTGCATGTACATCAATTTTT  
TTATTTTTTATTTTTTGTAAATTACATAATATAGTGACATAATTAATTATGACTTGGAAGGGATCCAGCAAGAGAA  
GGAGGTTAAACCAAATAAGATTTGTTGGGGTTGGGGAAGAGATGGTTGATTTCTAAAATGAAAAAGTTAAGAAA  
CGTCACCAACTTCAATTATCTCTCAAACCTCAACCCCTACAAAAGAGCCAAAACCTGTGTGAACAACAAACAACTCT  
TCTATATTTAAACCCCTCTTGTGTAGAACGCAATTAACCTAGCTAGAGTCAGCTTTTCTATTCTACATGTTCTT  
TGCACCTCTTTAGCTTTTCTGAAAATCATTAAAGACTCGGTATTTCCTTCTGCGAGTGCATCAGAAATTTGATCA  
TGAAAAGCTTGTTTGAAGAGCAACCACATCATCTTGATCACACTATAGACCATGCACCAACTAGCGGCCAATCTA  
AAGATGATCAAGAAATGGGTGTTAATGCCATGTCAAAGAGTGATGTCTTGAAGAACTCACCCCTTAGCTGCTTTC  
CACAAGGAATGGATCTAAATCTTGGACGCGTGTAACAGATCTCTTACTAAGCTTAGTATGATTATCACTTGATT  
TTACTGCATGAGCATGTGATGTCAATTTCAAATCACACCCTGATTGAGTCAATGCTTCTGTAGCTTTAAACATTAG

GGAAAATTTTGCATATATACGAAGAAGTTTGATTGGAATGCCTTCAACCTTCATAGGAGCTGCTTCATAAACTT  
TTATTGACTCCTCCACTATAGACATTTTAGTTATCGTGCATGTGAGTGTCTGATTACATATATGCAGGTTTTAG  
CAGAACTGGTAGGGACTTTTCATTTTGATGTTTTGTGTGTGCGGGATCATAGCGTGCAGCTAAGTAAAGGCG  
AAGTGGGTCTTCTGGAGTATGCTGCCACAGCAGGATTGACAGTGGTTGTTGTCATTTTCTCGATAGGCCATATCT  
CTTGTGCGCACGTTAATCCTGCTGTCACAATAGCTTTTGCAACCTTTGGTCATTTTCCATGGTCCAAGGTACATA  
ATTTTTCCAAATCTTCCTTCGAGATTTTAGTCATTTATTTTTTCATTGCAGTTAAATATATATTAATAAAATTTT  
AATCAATCACTTGAATTTTCATCACATTACAATTATACTCTTAAACTTAAAAAACTTCAATTTAATATATATCT  
TTTAATTTTTTTTTAAATCACCCATCCGTTAAGATTTTTTCATTAAATCTTAATGAAGGAGCGTCAAAATTTTCAA  
ATATCCTTCATTATTTTAGGGAAAAAATAATTGCAAGGGTCTAAGCAGCCAACAACATAATATACACACAGGT  
TGAATCTTTGAAGTTTATATATATAATATATATATATATATTATTTTTAAAAAATAGGGGTATTTCCATTTTAA  
AAAAATAGGGGTATTTTAGGAATAATGACAGAATTTAATGGAAAACCTAACCGCTCGAATGAAAAAATTTGAA  
ATTGATACACATTGAGAATTTTTTAAAGTTTAAAGAAATAATTAATAAAGAGGTGACAATTTAAAAAATTTGAGTGA  
AGTTTTTTCCTTAAATATTTTCATACATTAAATCTCACCTATTAAAGAGGAGTTAGAGCATTTAGGCATTAAAAATGG  
AGTTTGTCTTACTTATTGTGTGACTGTAACAGGTTCCGCTTTACATATTGGCACAACGTTGGGTTCCTGTGTTGGC  
AACATGTATTGGACAATCTGTCTACGATGTGAAGTCGGAATTTATGACCACCCGGCCACTCCGCGGCTGCAGCTC  
TGCCTTCTGGGTAGAGCTTATTGCGACTTTTATCATCATGTTTCTAGCTGCTTCAGTGACCTACCAACATCAATC  
TGTAAGCATTTTTTATTCTCTAATTAATCTGTGAGTTGGATTAAATAGTTTTGATGGAGAGTCAAGATATCCACA  
TGATCAACTTGAAATATTTTGTAGGTAGGCCATTTGTCTGGCTTCGTTGTTGGCATAGCCATTTCACTAGCTGTG  
TAAATCACAGGGTAGGTAAAAAACTCTTTACATGTGATTAGCAATTGCAAAGATCCTTTCGCGGTAACTTTA  
GAAAACCTCATAACTTTACGTTATTTCAAATGACCCCTTCAAAATTTTAAACTCTCAATTTAAGCTATTAA  
GTTTTAATTTCTTCCCTCCAATAGGATTTATGGTGCCAAATTCACAAAATACTCATTTTTTTTTAGGAAAAAAT  
TATAAGAATTTAGGCGTTGGTCAGGATTTAACGGAATTTGTAAAAACATCCACGACTGAATCTTTGAAAAAAT  
TTATAATTATTTTTTAAAGAAATAACGGGTATTTTGTAAATTTTGACATGATTTAACAAAAAATTTAATGGAA  
TGGGAAAATTTAAAAAATAATTAAGTTCAACAGACTAAATTGAAAGTTTAAAGCTTTGAAGGGATCATTT  
TAAATGCATGTAAGTTTCATGGGGTTTTATGAACTTTTCTGTTCTCTTACTGGTTACTTTTCTTG  
TATCAATTTTCTGGGTGTGCATTGTAGGCCTGTTTCAGGAGGATCAATGAATCCCGCAAGGTCATTAGGGCCTGC  
AATCATATCAGGGAAATTCATGACATATGGATATATATGACAGCCCCAACCATTTGGAGCCGTGGCAGGTGCTCT  
TCTCTTCCGAATTCTACGTCTTCAACAACGCCGCCCATGTAATCCCACTTCC**TAA**TTATTCCAGTCTAGTTGTTT  
ATACTTAATTCGGCCCTTGGTTCAAGGCTTCAAGCTAGTGCACAAGAAAATTTGATTTGAAGATATTGCTGGATC  
ATGTCAAGTAAATAAATGCCAAGTTTCGACTTCTTGGATGTCTTCAATGAGAAAGGTTGATCTTCTAAGTCTAGG  
GTCACCTTAAAGTACAAACCTTAGCTAAATTGCAAATTCGGGTGAATTCCAAATAGTATAACAAGTTTTAAATTT  
TGGGTTAAATCCAAGTGTCCATTTGATAATGTACTAAAAAAGTCATTAACCCCTAAAAAGTAAAGTAGCAATGTA  
TAAACCAAACTAATTTAAAAAGTGTAGTTTTTAATTTGAGATAATTCGAAATTAGAGTGAACCAAGTTGTATAA  
TTTGTCAAACATCTTTTTTTTTTATATAAATATAGAGAAATGCTACTTAACATTTTTTTGTTGTCCATCTCCAGCA  
TTCTCTTTGTTTAATAATCCTCAGAAGATTCTACGATTTTCTTAAATTCCTAATGTTAATTTTAAATCAAACTGT  
TGATATTAATTTTACCACATCAAAATTATTACTTTAATAATAGACTAAAAATATGATAAATAGATTACAAATATTG  
AATTGTAAAAATAATAAATGCTGATTGGACAAAATCAATGTGCAATTGGGCTCGACTAGTTTCACTGTTGACCAAT  
GCAGCAAAATCCTTGTCCGCTGGGCTGGGCCTAACCTAGTAATAGCCACACTGGTTACCTTTAGGATGACAAA  
ACGGCTTACCGTGTGAGTTTCGGATGAATCCACAATAAGAGACGATAAGATGGTTCTGCGGAAGCTTGAAATGTT  
GGCCACTTTTCGATGGTATTTGGGATGGTGCCGTGGGTCTTGGGTTTCTTGGGCAAGCTTGAAATCTTGGCCAC

>BpeNIP7;1

**ATG**AAGGGACAACCACATCATCTTGATCACACTATAGACCATGCACCAACTAGCGGCCAATCTAAAGATGATCAA  
GAAATGGGTGTTAATGCCATGTCAAAGAGTGATGTCTTGAAGAACTCACCTTTAGCTGCTTCCACAAGGAATG  
GATCTAAATCTTGGACGCGTGGTTTTAGCAGAAGCTGGTAGGGACTTTCATTTTGATGTTTTGTGTGTGCGGGATC  
ATAGCGTGCACTCAGCTAAGTAAAGGCGAAGTGGGTCTTCTGGAGTATGCTGCCACAGCAGGATTGACAGTGGTT  
GTTGTCAATTTTCTCGATAGGCCATATCTCTTGTGCGCACGTTAATCCTGCTGTCACAATAGCTTTTGCAACCTTT  
GGTCATTTTCCATGGTCCAAGGTTCCGCTTTACATATTGGCACAACGTTGGGTTCCTGTGTTGGCAACATGTATT  
GGACAATCTGTCTACGATGTGAAGTCGGAATTTATGACCACCCGGCCACTCCGCGGCTGCAGCTCTGCCTTCTGG  
GTAGAGCTTATTGCGACTTTTATCATCATGTTTCTAGCTGCTTCAGTGACCTACCAACATCAATCTGTAGGCCAT  
TTGTCTGGCTTCGTTGTTGGCATAGCCATTTCACTAGCTGTGCCTGTTTCAGGAGGATCAATGAATCCCGCAAGG  
TCATTAGGGCCTGCAATCATATCAGGGAAATTCATGACATATGGATATATATGACAGCCCCAACCATTTGGAGCC  
GTGGCAGGTGCTCTTCTCTTCCGAATTCTACGTCTTCAACAACGCCGCCCATGTAATCCCACTTCC**TAA**

>BpeNIP7;1

MKGQPHHLDTIDHAPTSQSKDDQEMGVNAMS KSDVLKNSPFSCFPQGM DLNLGRVVLAE LVGTFILMFCVCGI  
IAC TQLSKGEVGLLEYAATAGLTVVVVIFSI GHISCAHVNP AVTIAFATFGHFPWSKVPLYILAQTLG SVLATCI  
GQSVYDVKSEFM TTRPLRGCSSAFWVELIATFIIMFLAASV TYQHQS VGHLSGFVVGIAISLAVPVSGGSMNPAR  
SLGPAIISGKFNDIWIYMTAPTIGAVAGALLFRILRLQQRPCNPTS\*



## SIP – Small Basic Intrinsic Protein

***BpeSIP1;1***

```
>FXXK01000083.1:21000-33500 Betula pendula genome assembly, contig:
Contig82, whole genome shotgun sequence
>Bpev01.c0082.g0002.m0001
Chr Bpe_Chr8 23,172,529-23,181,063 (1) ::
join(23172529..23172825,23173422..23173694,23180914..23181063)
```

**>BpeSIP1;1**

[illegible]

AAGGTTGGCAATGGCTGGACTTTTTAAATAACTACCATATTCTGCCCTATTGGGAAGGGAATGGTAAAGAACTTT  
TTAAGCACTGATAGCGTGAAGTTAATGGGCTAGGCAGCTGTGAGATTTTAGTTAGTGACTTCCAATGTGTGTAG  
GTTCAAGATAGGGTAGGGTTTGAATCAGTCCTACTTGGCATAACCATGGATTATAAGCACGTGTTACATAGCAATT  
ACTTAAGGGCTTTCTTTAGAAAGTTCTTAGCCTTTAGAATTGTTAAGTACCATTGGACTTTTGTGCAAAAGTTGCT  
TTGCTTAGATTGACTGCTGCTTTATTTACTGATTGACTGGAAGTTTCTTTTATCAACTTTCTGATATGGGGTGC  
GAAACTCATCTCCAATGCCTGACAAGACAAGGCCTGTTGTGTAGAGGGATAGGCTGGCCCCACCTTTGCCCGTTT  
TCATCATGTGAAAAATTTGTGGGCCAAAGAAAGATTATTGCCTAAAGCACTCACTCTTTCTTTCTAGATGAACCA  
AGTAGATAAAGGAAGAAATTAGTATCTTCTCCTTTCCCTTCTTCTACCACAAATATGGGCTACAAAAATTGAGTTC  
TTCTCAATCCTTTTACATCACCATAGATCCATACCATTGGAGACGGTTTTTGATATTTTTTGGGTTTGAAGGGATCCA  
GGGAGATGGAAGTGTGGCAAAATAATATTATATTTTCTGCTAACCAACAACCAAGGAGAAATAGTCTTCGGTCTA  
AGCGGAATGAAGATGGTGATAGTTTGGGGCATAGAGTCAATAGTTGGTGGCAATGGTGATGGTAGAATGGTGGCA  
ACGGTTGATGATGATAGGTGATGATGGTAATGGTGTGCTGTTGGCGATGACTGTGAGTGTGACACTGATGGCA  
ATAATGATAGCAATAATTGCAGTGAATAGGGGTAGGTGAAAATGAATATGGGAGCATTGGGTATAACTTTTATTT  
AACATACTCTGTTAATGCCATCCTACCTATGGAACCTCTTTTTTTTGGAGATTTGTGCGGGGAAAGGGAGGGGTGCAG  
GGGGTTTGTAGTTTCAAATTTGAGTGTAGTAAATATAAGAACAAATTTCTAGAGTTACCTTATTGGATTGTGATC  
TTAGGAACATTGAGGAAATTAATAATATGCTTATTGGAATAATTTTTATCAGCAATATAAGTCTGACCTAGTTG  
AAGAATTTGGACCTACTGTTGATGGGACAGAATTTAAGGAGTCTCACCATTACTTTTTTTTTTTTTTTTTTTTTT  
AAGTTTATGTAATATCTCACCCTTTTGGGACTTAGTTGCAGGAATTTCAATTCTGAGGTGTCTACCTAGATGCTT  
GCTAAGAAGACAGTTTCTTTCAGAGAATCATTGGGGCATGACAGACACTTGAATCAGATTGAGAGACATTTAG  
GATGGTGAAGGAAAACATTTCCAATTTTCAGATTTGTCCATGAATGGAGAAGTGATGAAAGACATGTTAGTTCCCTA  
AGTTTAGCTTAAGAAGATCATAGTACAATAACAATCATCATAGTACAATAACAATCACTAAAAATCTTGATCCCTT  
ATTCAAATTCAGAAGTTTAATGCAACCAATCTTTATGGCTAGGAGTTTTCAAATTTCAACCATCCCATTGCGT  
AAACTCTTCTATAGATCTTCATATTACCTGATTGACGGGTTTAACCATTGCTTTAAGAGGTGGTTTTATGGTAAG  
GAGTTGTCTCATAAGGATCAATAGAAGGAGACTTATCTAGCTCGTGTCAATTTGGGTTCTCTGGGGCTAGAGTTT  
GTGAAGTTAAAGGAACTTTGCTAGATATGCTATATACTATCATATATATATATATATATATGTTTGTACCTCTCTT  
TTTCATCTACGTTTTTCCCATAAATATAAGTGTGAAATTCTAAATCTTATACTCTTCTTTGAGCAAAATTTG  
AGCTATAGATTAACCTCATACCCAAGTTGTACCTCTTCCCTTTTCTGTTTGTAGAGGTCTTGGAGTCTAGCCATGG  
AGGGGTGGATTTGGGGACGGTTAAGGCTATTGCCACAGTGAAGCCTTTGGTATGTAATGTTATTATTATTATTT  
TTAATTTCTAGAAGCATGTGAGGCCATCCTCCTAAAAAAGATTTCGTCTTGTTAATTGTAATACTCAATTCGCACA  
TACGCCAGGCACCTTTTTTTAGAAGAGCAAAGTGTCTAATTAATGATAAAAACCTGATTTAGGCTCTGCACCTTAT  
AGCAAACCTTCTATATTTCTGAGACATGTATAATTGGAATATGCTTTGGATAACTGACTGTTGCAGGGCCCACTT  
CTATTCAAAGAGTAATGATGGTTTTGTCTTGTCACAGGCTTTATAACCATTCTTTGGGTCTTGAAGCTCTGCAGT  
GTTTTTTTTTTTTTTCAAGTTCTGTTCCAATTTAATTGCATCATGATGCCCCCTGATGCAAAAAGATATGATGTTGGT  
TTTTTGTTTTTTCTCCCTTAAATATCTTTCTTTCCGAGCTTCTTGTGTGTGCATTGCATTATTTGAGAATTAA  
GTGCGATTAAAAAGTTAAAGCTTTTCATATCTTTTCATGTACACCTTCTAGGATTGTGGCACTATTAGGATCAATT  
TCTATGTCCCTTTACGCTATTCAAAGTTGGACATTGATAGAACTCATAGAGACCAATCTAGCTCATTGTTGCTTC  
TTGCCTTATCGGAAAAGATGCAGATGTTTTCTACTGAGTTTGCTACCATCTCGGGAGAGGTTAATTTTGTGAGC  
TCGGCTAGGATAGGTGATTCTGCCATTTTCACTTGTGGCTTTAAATGTTGGCATGTGTCTTTGAGGAGCATCC  
ATTTCTTTGTAGAGACCTCTTACCCTCTTACTGCAACGAAGACTTCTTTCTCATGGGTTTGTATATGTAATACAT  
AAATCTAAATTTTTTTTTTTTTTTTTTTTTTGGGGGGGGGGGGGTGTGTGTGTGAAAAGAGGGATCTCTCTTGAGGACT  
TTGGCTTACGATTTTTTTTTTCCCTCACAACCTTGTTTAGTTTTCTTCTTATGAGGATCTCTCTCTCTCTCTCTC  
AATTTGTTTTCAATAAAAAGAGATGTTTGTCTAGCATGATGAAAGAAAATGCTGACAGGCTCCTTATTGACTATC  
CTTGAAGTTGATTTTTTGGCTTTGCGAGATTAAGAGATTTGTCCAGGCTTGAGCTTCTTCTATTCTTTCAACAAT  
CTCCCTCAATGATTTTTCTCTTAATATTCTGAACAATGTTATGTGCAATACTAATTGCTAACTTCTTACTAGTAGA  
GTTCCATCAGTAAATGAACATAAACAACGAACCTTTGAAAGATCTTAAGCCGTAGAAGCTCCTTAGACTCAATAAG  
TTACGCAAAGTTCTTCTGTTGTACTATAACTTGCCCATAAACTATTTTTCCCGCTGTCTTTGTACTTCATCTTCA  
AGATCTCTAGAAAAGTAAAGATGCCAAAGTAGTCTGTCACTTCTACTTTGTAATAGAGTATCATACCATGGCTGCT  
ACCATGCTGAAATTGTTTTGCTTGATCTTTTTGCTGACTTTGGGATTTTAACTTAGGAAAACTTCACTTACCCC  
CTCTAATTACCATGCGATTTGCAATTTCTTCTTAACTTTAAAAATTTATAATGTGGGCTGGGTTGGAACACCC  
CTGCCTTTGGGGAGTCACGAGCCCCCACTAAAATTTTAGAAATACTACAAAAAATTGAAAAATTTCTTCTAATTT  
TATGTATTTTTATGAAATGGACTCCCCAAAATTAATTTTTTACCTCCAAAATTTTTTAATTTTTTTAGTTTTGTCCCTC  
CCCCTCCCCTCCTAATATTAGTTCCGCCCTTGAATGTGGGATTCTAATCTATCAACCCATTTTCACTTACTCCCT  
ACTATTAAATTTTTTTCGTTAACTTAGACAACATAACATGTATAATGTTTGTAAACCTTGATAAAATTTATAAAAT  
ACAACATATGCCTTAAATTAACAAATAAAAAATTTAGAAAAACAAACAAAGAACTAAAAAGACAAAAAAAAAAAA  
AGTAACAAAGATCATTTTTTTTTTTTTTAAATAAACTGATCCACGGACACTCTATGGGTGAGCAAAACCATGGCGT  
GACCGTGTGCATCACCATACCACCTGTGTGGCTGTGGTTCTAGACCGTGGACATGCTGTGGGTCACTCAATTT  
TTTTTCCCATTTTTATTTAAAAAATGGGCTCTTTTTTTTTTTTGTCATTTTTACTTTCTCCGGTAGGATTTAGAGT  
AATGTTAAATACTACACTACCATCCCACATTCATCCACTATGCTGACGTGCAGGGCCAATTCTACCCTTGGCAA  
ATTAGGCGGCCGCTAAGGCCCTTATTAATAAATATTAATGAAAATTTATTCCATAAAAAAATATTTAAGGCC  
TAAGAATTGTCAATATTCTCTAATTAAGGCCCTAATTTGATAAAATCCTCAATTAATAAATATTAATGAAGATT  
TATTCCATAAAAAATATTTGAAGACTTAATTATAGTCAATATTCTCTCGCCCAAATTATGGTAAATAAGTAATTA  
AGAAAGACATTAATATCATTTGATTCTTTTAGAACTTAAATCTCCAACATTCCATTCTTGAAACAAGTCTTAA

AAAATTGATAGCATTAAATAAGGAATCAAATAATATATTAATATTGAAGTCATTCTTAAATAAAACCCATTCTGG  
GGTAGAGTTTTTTTTGACTTTGTGATGAGCAGCCAAATTTTCATCATAATTTACAAGAAGCAGCTAATTAGCAATA  
AATTATGATCTCAAGTCCCAACTGCCAACTGGATCCTTATTGTAAGATATGATTTTTTTTTTTCTTTTCTTTTTT  
TTTTCTCTAACATTGGGTTGCTTCTATCCACACGCAACATTCAAAAAAAAAATAGAATTCATGATTGGAGTCCAA  
CGTTCAAAAAAAAAAATTAAAAAAAAAAAAAATTGAATTGAATTAAATGTTAAGAAAAATGGAAAGCCTCTAAAAAT  
ATTTTATTCAGTTTCCATTTTTTCTCTCTATTTCTCTATTTAAGACTTATTCAAATTTGAATATAATATAAAAT  
AATATTTTTTTTTTCTAAAAAAGCCTCACTTAAACTTCTCGTCTTAAGCCTCAAAATGTATTAAGCCGACCCTGCT  
GATGCGGCATTGTCAATCTATCATTGAATTTGTTTTTTTTTAACAAAGATTGATCCAATGGTGAATTGGCAATGTC  
ACGTCAGTATAATGGAATTGTAGTGTAGTATATAGCATTACTTTAGAATTTAATAGAAAACTTAAACAGAGAGAG  
TAATTGAAAGGGGTTGATAGATTAGAATCCACATTGCAAAATGCATAGTAAATTAGGGGGTAAAGTGAAGTTTCC  
CTTTTAACTTATTATTGAATTCCTACTCCCGCCAATGAGCTCTAGCTTAATGGCACCTCCTCGCCCTCTAAGAAC  
AAGAGGGTAATGTTGTGAGTTCAAGACTCATTGTGTGCGTTTGAGTTATCAATTTAAAAATATATATATATATAT  
ATTGTCAAGCATTAAACGATAAATGCCATCTTGTGATGGTGTATTATTTTATCATTCTGAACACCCATTGGAAT  
GTTTTTTGTTTTTTGTTTTAATGATATCCAGCACACTTTCACGCTTTTCTACTTGATAAACTTTCATTATATAAC  
TCTTAGAGTTCTGTTGGTTTTGCATTTTACCGTTTTATATCAAAGGTTGAGCTTCTTCAATTGAAAAATTTCTTAT  
ATTCTAATAATCTGCATGATTTTGCCTGTTCATGTAAATAGCAGGTTCTTATTTCAATTTGACTTCCTACTTAT  
CATATACATGCATACATACTATATATATACATGTGTGTGTGTGTAGAGAGATAGACAACTTTTTGCTTTAGTAA  
ATGTGGAACATAGGTAAGTATTTCCAATATGAAGATGTGTGAAGTGAAGTGAAGTGAAGTGAAGTGAAGTGAAG  
CATCATTTATTTGCTTTCTTCTTATCTTTTGTTAAGTTAAGTGAAGTGAAGTGAAGTGAAGTGAAGTGAAGTGAAG  
CTCCATGCTTGTATGATGATATCTATATGTTTCAAAATGGAAGTGAAGTGAAGTGAAGTGAAGTGAAGTGAAGTGAAG  
TATGGCTACTGAGGGTCTATATCACAAATTTTCTGACAATGGAAGCAAAATGGAAGGCGGAGAGAGAAAGGGG  
GGGTAGAAAAAGAATAATTTTTCTTGAACCAAAAAAATAATTTCTATTTTAAATGGAAGCCTTATGGGATGTGCGA  
ACTTTTTACCATGTATTGTCTCTGCGCCTTTGGTTGGGCATATGTCAACAACCGGCACAACACATGGGAGCAGT  
TTTATGTGTACTGGATCTGCCCCCTTCGTTGGAGCAATATTGGCTGCTTGGGTCTTTCGGGCTCTCTTTCCCCCAA  
CCCCAGCAAAGCAGAAGAAAGCC**TGA**AGAGGCACAATATCTTATCTGCTCGTCCATTAGTAAATAAGCTTGATG  
TTAGTAATAAGGACCTTTCTTTTTCTTTTCTTTTCTCTCTTTTTTTTTTTTTTTTTTCTCTGGTGCTACCTTACT  
AGTAGTATTGGGACTCTCTTCAGCTTATGGATCAATAATATAACCTGTCCAGAAATTAATATTTGCAGCCTGTAT  
GCGAGGTTTGTCAATTGACTAGTCCGTTTTTGTGTGATGGTGATATGGTCTACTTTTCAATTTTTTTTTTTCTTTTC  
TTTTTTATGGGCAAGTAGAAAGAAAGAAATTTAGATCACGGGGTCATGACTATCAACAAAGGGGAAATAGAGAATG  
CGGGTGGAGAGGAATGGAAATGTTTCTAGTAAAGTAATTGAAAGGCGACCCACCCCTCTACAGATAGCATGTGGT  
CTGCTTTTTTAAAGAGAGCTACTTGTCTCTATTCTACGTCTGTATTAGTGTCTTGGTTCATTATTGGATTCTGT  
AAACTGTGGGATTTAACTCAGAAAAATAGTGAATGATATGCTATGACACACCCGAATGTTGCACAAGATAACTTG  
GTGAGATGTCTCTGTACGGCCACGCGAATTGGGGTGTTACTGGCTAGGGTACTATTCAAGGTACAAGGTTGGTG  
GTTTTGTAAGGCACACTGGACAAGCCTGAGAATTGTACAGGTGCATTTGATGCTGCATTCATTTACATTTACATT  
TTCATATCTCATGGTTATGAGCTTTTTGCTTTGGCCTCATAAGTTTTCAAAAAACATGGTATGATTTTTGTGGAAA  
ATTCTAACCTAAAACGGATGATATTTCTGTTCAAGTATTCCAAGATGCACTCACTCTTTGTTTTGATGGGTCCAG  
AATATGTTTATGGCCCCGAATGAGGAATGAGGTTATAAGGGGGATCTTTATCATTCTTGATTCGAAAGGAAGAGA  
GAGTGAAGATTCAA

**>BpeSIP1;1**

**AT**GGGCGCGATAAAGGCGGCAATCGGAGATGCAGTTCTGACATTCATGTGGGTGTTTACGCGCATCCACGCTGGGG  
GCAGCGACTACGGTGACAGCCAGAGCCCTCGGAATTGAAGGGCTGGTGTGGCCTTCTGTCTTCATCACTACCGTG  
CTTGTATTTGTTCTCGTCTTCTTCTTTCACCTTGATCGCTAATGCCTTGGGTGGGGCCAGCTTCAACCCACCGGC  
ACTGCCTCCTTTTACGCTGCCGGCCTGGGTCCCGACACCCCTCTTCTCCATGGCCCTACGCTTTCCTGCTCAGGCA  
GCCGGTGCTGTGGGTGGTGTCTTGGCAATCATGGAAGTGATGCCCAAGAACTACAAGCACATGCTTGGTGGGCCT  
TCTCTCAAAGTTGACTTGCATATTGGAGCCATTGCGGAGGGGGTGTTGACTTTCCTCATTAGCTTTGCTGTCTT  
GTAATCGTACTCAGGGGTCTCTGTAGCCCGATACTGAAGACATGGTTACTTGCCATGGCGACAGTGGCATTAGTC  
ATTGCGGGTTCTAATTACACTGGACCATCCATGAATCCTGCCAATGCCTTTGGTTGGGCATATGTCAACAACCGG  
CACAACACATGGGAGCAGTTTTATGTGTACTGGATCTGCCCCCTTCGTTGGAGCAATATTGGCTGCTTGGGTCTTT  
CGGGCTCTCTTTCCCCCAACCCAGCAAAGCAGAAGAAAGCC**TGA**

**>BpeSIP1;1**

MGAIKAAIGDAVLTFMWVFSASTLGAATTVTARALGIEGLVWPSVFITTVLVFVLVFFFTLIANALGGASFNP  
TASFYAAGLGPDTLFSMALRFPAQAAGAVGGALAIMVMPKNYKHM LGGPSLKVDLHIGAI AEGVLTF LISFAVL  
VIVLRGPRSPILKTWLLAMATVALVIAGSNYTGPSMNPANAFGWAYVNNRHNTWEQFYVYWICPFVGAILAAWVF  
RALFPPTPAKQKKA\*

## BpeSIP1;2

>FXXK01000388.1:89824-92655 *Betula pendula* genome assembly, contig:

Contig387, whole genome shotgun sequence

>Bpev01.c0387.g0011.m0001

Chr Contig387 91,110-91,829 (1) :: 91110..91829

## >BpeSIP1;2

ATTGAATCCCCGGCCCAAGTATTAGATTGGGTCAAAGTCCACTTAGACTTATTAGTGCTTGATGGACTGCATCA  
AAGCCTGAACCTTGATAAAGTTGTAGCTTCGGAACCCAAGCCTAGTTTGAAGGTGGGCTACTCTCTTCGTAAATGG  
CTTCAATCAAAGTCATCAAAGAACCAAAAGGAAAACCTTTACAGAGTGTAGCCGCAAAGTTTTTTTTTTAAAAAA  
AATTTTCATATTTGTAAAAAATTTATAAGCCTTAAAGGTGATATGTGTCTTAACATGTGAGAAGTACATAATTT  
TTTTAATAACATGTGTTTCTCATATTTTTTTTTTAACAGCATTAATAAGAAATCACGTGCTTTTTATATGTTTAAAG  
AATATATGTTGCTTTTAGAAGCTGATTTGTAGGATTTGTAGAAAATTTCTGTCAATTTTTTTTGTTTTTGT  
TTTTTTCAGAAGACTTAGTTGGAAGGTATTTATTCATCTCAGTTTATTAAATTAACATTTGTCTTAAAGCATGC  
AATTTTTACATGTATTTTTTATTCTTACATCGATCAATTACATAAAATTTTTTAAAAATATGTCAATTTAATAAAAT  
TAAAGCGGAAGAATTCTGAACAACGTATTTCTAAGTCTGAACAAAGTCTCCGAGGCATGAACGATCTACTTATA  
AGACCACGCATGGCATGGGCTTGAGGCAAGCAAATTAATTAATTGACAATTATTTTATAGTCAAGATTTAGGT  
GATATTATATTAGCAAACCATTAATAAATAAATAAATAAATAAATAAATAAATAAATAAATAAATAAATAAATAA  
CCTCCATTTTCTCGAACCTTTGGTATGACTACGCCATTTGACAGACAAGTTTCAACCGTCAATTTAAAGACACT  
TTTGATTGGCTATTGGCTATTGGCCCGTCACAGTACCCGGCACTTTTGCTCTACCATTAGCTCAAAAAATATCTA  
CACGCACCTCTCTCATGTTTTTATTTTTTGGTAGGTATTAGGTAAGCACGTGAAAAAGGACACATGAGGCGGTCTG  
TTCTCAAGCACACAAAAAATGGCCTCAAATTTAAGCGTATAGGAATCTACAAAACCCACAAATATAAAAAACAATT  
AATTACACGCTTGGTGGCCCGTGCATCTCTATTTTTTGTTTTTTATTTTTTCTTGGAAAGAAATGCTGAAATTC  
CACGTCAGTAATTACTTTGTGCAACTCATTATAGAAGAGGACAGAAGAAGATTGAGAGCAAAGATCAGAAGAGT  
GGGCCCGCCGATGGGTCTGATGAGGGTGGCGATCGGAGATGCAATATTGACATCGTTGTGGGTTTTTCAGCGCGC  
CGATGATGGGAATCCTTACACCCATCATAGCAACCTACCTTGGCGTACAAGCCAAGTCACTGGCAGGGCTCTTCA  
TAACCACCTCTCTCGCCACCAGTCTTGTATTGATATTCCAGTTGATTGGCAAGGTCCTGGGCGGTGCCAGCTTCA  
ATCCCTCTACCACTGTCTCATTCTACGCCGCCGGCTTAAACACAACCTCATCTCTCATCTCCATGGCCGTGCAGT  
TTCCGGCTCAGGCCGCCGGCGGGCTGGTTGGCGCCAAAGCTATACTCCAAGTGCTGCCAAGCCAATACAAACAGA  
GGCTTAGGGGACCTTCCCTGAAAGTTGACTTACTAACCAGGAGTCATTGCCGAGGCGGCGTTGACTCTTGGGCTTA  
GCTTTGCCATCCTTTTGTGATGCTCAGGGGTCTTAAATCCACTTGTAAAGGTGTGGTTGGTTGCTGTGGCGA  
CTGTGGGATTGGTTGTTGCAGGGTTCGGGTTACACGGGGCTTCGATGAACCCGGCCAACGCATTTGGGTGGGCAT  
TTGTGAATAATCAGCATAATACTTGGGAACATTTTTATGTTTACTGGATTGGTTCTTTCACTGGAGCAACTGTGG  
CTGGTTGGATCTATCGGTTTCTCTTTGTTCTCCCAATCAAGCAGAAGAAAGCCTGAAGAAGCATTTGGATAAGCT  
AGCTAGCTAGCTAGCTCCTACTGACTATGGCCATAAGTTTTTTCTTTTTCTTTTTTATTCTCAATGTTAAACAT  
TAGTAAAGTGAATAAATTTGCTGTTTCTCATTAGTTGCATTAAAGCGTATATTAATGGTGAATTCGAGCCCTGAC  
CCTACTTTACCTCGAATTCGGAAGTTAAATTTAAATATCACGCGTTAGGTTTAGTATTATTGAGGAGGGTGT  
GACTCACTTACATCAAGGAAAATGTTTAAATAATTACATTCAACATTTTCACTATGGCTTAAGAAACAATCAAGA  
GAGCAATTTTTATAGAGGAATGCTAGGTGTACAAAGGTTTTTGTACAAAAATTTCTTACAAAAATGAGGTGGCACT  
AAATGATTGAGTATAAGAGAAATTCAAATTTTGAATTATCCAATTATTTAGTGCCACCTCATTTTGTAAAGAGTTT  
TTTGTACAAAACTTTTGTACACCAATCATTTCTCATTTTTATATGGTCTTGGTACAAATCAAGTCTTTTATACC  
ATTCATAAAAAGAGTAAACATCATCTTGAACACAAAAATTAATGCTACCAAAACATTAAATCTCCCTCTTCA  
ATCCCTCATCAACGGAAGGTTTTCTTTCTCTCACTATTATCACTCTCTCACTTTCTTGGAGAGACAAACA  
ACCATTGCCAGAGCAACCCCAAGTCGGATGCCTCTGCCACTGCCCGCTCCACCCTCCACCCTCCACCCTCCACCCT  
TCACCCTGTCCAGAAAAACCCACGGTCAACGCTAGGCCAAATCCCATGGCCACA

## >BpeSIP1;2

ATGAGGCGGTCTTCTCAAGCACACAAAAAATGGCCTCAAATTTAAGCGTATAGGAATCTACAAAACCCACAAAT  
ATAAAAAACAATTAATTACACGCTTGGTGGCCCGTGCATCTCTATTTTTTGTTTTTTATTTTTTCTTGGAAAGAA  
ATGCTGAAATTCACGTCAGTAATTACTTTGTGCAACTCATTATAGAAGAGGACAGAAGAAGATTGAGAGCAAA  
GATCAGAAGAGTGGGCCGCGGATGGGTCTGATGAGGGTGGCGATCGGAGATGCAATATTGACATCGTTGTGGG  
TTTTTCAGCGCGCCGATGATGGGAATCCTTACACCCATCATAGCAACCTACCTTGGCGTACAAGCCAAGTCACTGG  
CAGGGCTCTTCATAACCACCTCTCTCGCCACCAGTCTTGTATTGATATTCCAGTTGATTGGCAAGGTCCTGGGCG  
GTGCCAGCTTCAATCCCTCTACCACTGTCTCATTCTACGCCGCCGGCTTAAACACAACCTCATCTCTCATCTCCA  
TGGCCGTGCAATTTCCGGCTCAGGCCGCCGGCGGGCTGGTTGGCGCCAAAGCTATACTCCAAGTGCTGCCAAGCC  
AATAACAACAGAGGCTTAGGGGACCTTCCCTGAAAGTTGACTTACTAACCAGGAGTCATTGCCGAGGCGGCGTTGA  
CTCTTGGGCTTAGTTTGGCATCCTTTTGTATCATGCTCAGGGGTCTTAAATCCACTTGTAAAGGTGTGGTTGG  
TTGCTGTGGCGACTGTGGGATTGGTTGTGTCAGGGTTCGGGTTACACGGGGCTTCGATGAACCCGGCCAACGCAT  
TTGGGTGGGCATTTGTGAATAATCAGCATAATACTTGGGAACATTTTTATGTTTACTGGATTGGTTCTTTCACTG  
GAGCAACTGTGGCTGGTTGGATCTATCGGTTTCTCTTTCCCTGA

## >BpeSIP1;2

MGLMRVAIGDAILTSLWVFSAPMMGILTPIIATYLVQAKSLAGLFITTLATSLVLIFQLIGKVLGGASFNPST  
TVSFYAAGLKHNSLSISMAVQFPAQAAGGLVGAKAILQVLPSQYKQRLRGP SLKVDLLTGVI AEAAALTLGLSFAI

LLIMLRGPKNPLVKVWLVAVATVGLVVAGSGYTGPSMNPNANAFGWAFVNNQHNTWEHFYVYWIGSFTGATVAGWI  
YRFLFP\*

## BpeSIP2;1

>FXXK01000213.1:133500-142000 *Betula pendula* genome assembly, contig:  
Contig212, whole genome shotgun sequence

>Bpev01.c0212.g0010.m0001

Chr Bpe\_Chr8 12,136,640-12,142,650 (-1) ::

complement(join(12136640..12136804,12136967..12137227,12142366..12142650))

## >BpeSIP2;1

TCTTATTCCACCTTAATGCAGTATTTAAAGAGAAAAAATTACACATAAAAAGAAGTCACAGTCCCACACGAACAAG  
ACTCTCCTTTGAAACAGTCTCCTATCCGAAACAACATAAAGAAGAGGTAAAGTAGACTCCTACTTGAATAAAAACA  
TAATCCCTAAACCAAAGAAGATAAACATAAGAAAAGTCTCCACTCACGTGAGAGACCCACCCTAATTAATAG  
ACTCAATAACATAAAGCAATAACATCAATATCAACTCTATCCAGTACAGTAGCTTCCAATAGCTTCCAATCTTGC  
ATCCATAACAAGTGTATTGTTGTTTCCCTTCCCTGTTCTATTTGCTTATATATAAAAAAACTTATAAATAAAA  
AAAAGATAAAAAAAGCTAGTTTGTGTCTCCGCAAATTATAAAAAAGATTCTAAAAAGTTTtaggTTtagCATTTAT  
GTATAAAGAATAAGCAAATAGTAATGTTATATAATATATTACTATTTTACTATATTGACGTGACATTGTTAATTT  
ATTATTGATTTTTATTTTTATTTTTTTATTATAAAAACTTATTTAAGAGTGAATTAATAAGATCATGTAAGCAT  
AATAAAATATCGGTGAAATATTAATGTGTTATATAGTATTAATCATATGCAAAAGCATGTAAACAATTATCACTA  
AATAATATAATTTGGAGGATTCAAGTGAGTAGTCAAGTATTGAGATTTCATTTCTTGGGTGAGACCCACATTATC  
GAATAATGAATATGCATGATAGGGAAGTAATAAGAAAGAGAGTAACCTACCAAAAAAGAAAAAGAAAAAGA  
AAAAAGAAAAAGAAAAAAAGAAAAAGAAAAAGAACAAAGAAAAAGAGGGAGTAAACCAACGACAGCTTGTAAAAGC  
AAAATTTGTCAATTTTATTTTGGCCACAACGACCCGCTAAAAGGCGAAAAACCGAGTCACAACGACCCATCATC  
ATACGACGGTACGGCACACCCGAAACACATGTCAGACATCGGACAACGATCACAACACGTCAAAAGCTGAAAAACA  
GAGGAAATTTCTATGGTCTCACACTTTTCTGGAGAATCTTTCGAAAAATAATTGTATCTCCATCGTAATCTATAA  
AAAAAACTGTGTCTCCATGCGCAGAGAGAGAAAAAGAGCGTGTCCAAGCCACCCAAATAGTAGGAGAAGAAGAAGA  
CTCTTTTCAGATTTCTCGTCTGAAAATGGCTTCGGCTGGTTTGCTGGTCTCAGATTTCAATAATCTCTTTCATGTGG  
GTATGGTCAGGGGTTCTGATTAAAGATCTTTGTGTACAAAGTTTTGGAGTTGGGTCATGAACCCAGTGGCGAGGTT  
ATCAAGTGCGCTCTCTCCATCGTCAACATGTTCTTTTTTCGCGTTTTTTGGGTAAAGACTACCAAAGGTGGAGCCTAC  
AATCCTCTCACCGTGTTGCTGGTGCCATTTCTGGGGATTTCAAGCGCTTCTCTTTGACGCTGGTGCTAGAATC  
CCAGCTCAGGTTACCTCTCTCTTTGGTGCTTTTCATTTGTTTGTGGAACCTATGTTTTTGTGGTAAACGGCTTA  
ATTTGATTGAAATGTGAATTTACTTTGTTTTATTTCGGGTGTTGAAGCACTGTCTGATTATCGAGTGGATTTGTTT  
GATTGAAGCGCTAACTGGGTTTGTCTTTATTTGCTTGTCTGGTTCGCGGTAAAGTGAAGGAAACAGGATTTTTTTG  
ATTTATGTCAATTTTATTTTGGCCAATACTGGAGTACTTGCCCTCAATCATGACAAATAATTGTATAAAGCTTACT  
TGGGTGGATATCTAAAGTTTTTTGGGCTCCAAAATAAAATTTTAATTGAAACTCCAGCTTGTTTTCTTTTTTCAGAA  
ATGAATTGGAGCATGATCTTGGTGTGTTTTTCTTTTTTAAATTTATCTTTTGTGTTGGAAGCTGAAACTTACCGA  
AAAGAAGGAATGCGGAAATCTTAGTTCAGCTTTTTTATGGGGCTTTCTGCTTAATTTGTCTTTTTGATTTATAC  
TTGAAGTGCAAGATGTGAATTGGGTTTTGTAGTTTTGTTATAGTGAATTGTCTTGGTTGACGACTTCTCTTGGCT  
TTTTTATTTATTTTTTTTTGTTGGACTAGATTGATTGATTAATGTTCTATAGTTAGTTTGAAGTGTGTTCTCTA  
ATTAAATTGCATCTGGCTGGCAATTGAATAAGCTTGTGAGTAGTAAAGGATACAACAATTTGATGTTGTTAACT  
CTCTTAAACGATGCAGAGAGATTAGAATGTCTTTATAGAATATTTGCTGTACAGAGGTTTCGTTACAAATATAACT  
CTACAACAACGATCACGCGTGATGTATTTTATCACGCTTATCTTCAACTATACACTTTGAGTTTGAAATCTTGC  
TATCATCATTTGAGTTTGAAATCATGATCTCATCTTTCCTGATCTGATTGTGAGAGGATGATGTTGTTATAGGCC  
CCCTCAATTTGTAGCGGGACAGGAGGCACACTAAGATTGTACAAAAGTAATGAAAACCATTGAGATACAAGGGACT  
TGGTGAATTGTACGCTTTTTTGATCTTTACTTGAAATAAATTGAAACAGTGAATTTTTTGAAGCCACCTTATCTT  
GAATAAAATGAAATCGATCTCAATATGTTTTGTGCGTGCATGAAACATGGGATTGGCTGTGAGATAAGTAGCAC  
CGATAACATAGGTGGAGTGGTAAGAAAAATGCCCAATTCCTTAAGTAGAGACTGAAGCCATTGAAGCTCAGCTGT  
GGTGTAGCCAAGGCTTGATATTTGGCCTTGGTACTAGACCGTGAAACAATTGCCTATTTGCGGGAACCTCCAAGA  
GATAAGGTTGCTGCCAAGATAGATGCATAACATCTAGTGGACCAACAATCATCGGGGCAACCTGCGCAGCCCCGA  
TCAGAATACGAATGAAGTTGAGTAGATGATTGACGCTGAAGAAGTAAACCATGGAACATAGTATGCCGTAGATAG  
AATTCTCTTCATCGCTGTCCAATGATTTATAGTTGGGTGTTGAAGAACTAGCACACCTTGTTTACGGCAAAAAGA  
AACATCGGGGACGTTTGGGAATGGCTTGGGCTTGCACTGTTTACGTTTATTATTTTTTCAAAAAACATTCCCAC  
TTTTTTATATCACATCAACTACTTTTAAACAATTTTTTCACTTTTTTATATCATATCAAAATATTTTTATTACATT  
CATAATATCACTAAAAAACAAAAATTTTCACTTTCCAATACAAAAAATTTACAACATTCCCCTACTTTTATATCA  
CATCAAAAGTCAACAATCCCCAAACCACAATCCCAACCCTTTGCCAAACACCCCCATCAGGTCTTGTAAAGTTAAA  
GGCACTGCATGGATCCCCTATGCTATGGTAGAGAGAAGGATCTGAAAATGCTTCACCATCAAAATTTTGAGAGTG  
AGGTAGTGAGGAGACATAGACGTAATAGGTTTAGATTTGCCATATTTGCACGTTGTAGCAAATCCAAAATATACT  
TCTTTTGTGAAGAGATAGCCCTTGCGAATCATGTTGGACTTCAACACCTAAAAAGTAATGGAGAGTGGCCCCAT  
GTCCTTTTATCGGAAAAACACCTTGAGCTTGTAAATAAGAGAATTAAGAGCAGATGAGTTTGGGCCAGTTACAAT  
TATATCATCCACGTATATGAGGATGAAAATTATAGTAGCACTGTGGCCATATATGAAGAGAGAAATATCAGTGCC

GAAACCCACCAAAATCCAATATCCAATAGCTTTTGAAGGTTGAGAAAACCAAGACTTTGTGGGGCTGTTTGTAGGCTATAG  
 AGGGGATTTCTTAAAGGTGGCACACGTGATTTGGAAAATGATGGATGAACATAGACCGAAGATTGAACCATGAAGAC  
 ATTCTTCTGCAAAAAGCCATGTAGAAAAGCATTGTGAACATCTAACTGTTTTATTCTACTAGTTGGAGGCAACAGC  
 CAGTGAGAGAATAGTTCTAATGGTTGTGGGTTTCACAAATGGGACTAAAAGTCTTCCCAAAATCAATACCGGGCTG  
 CTAATGAAACCCCTTTGGCCACAAGACGGGCCCTTGTAGCGATCAATACTGCCGGTTTCTCTTTTGATATAGAAAACC  
 CATTGTCATCCCCTAGGTTTCATGTTAGGACGTTGAGGAACTAATGTCCAAGTCCCATTCTGCAAAGAGCATTAA  
 ATTTCAGTGTTCATGGCCTCTCTCCACTTCAGACTTTTTTGATACAGCAGTGAAAAAAGTAGACTCCACATCAAGAG  
 ATTTTCGAGCCCAGGTTGAAGGAAAATGGTAATGTGCCATCCGTAAAAACGATGTGGCTTGCAAATGTTGTTGCGCAA  
 CCATGTCTGCATATGATGGCAACTATTAGTACTGAAACTTGGGCCTGAGTGTATTATTATGAGACTCCACATCAAG  
 AGATTTTCGAGCCCGAGGTGAAGGAAAATGGTAATGTGCCATCCGTAAAAACGATGTGGCTTGCAAATGTTGTTGCGC  
 AACCATGTCTGCATATGATGGCAACTATTAGTACTGAAACTTGGGCCTGAGTGTATTATTATGAAGGCAACCATGT  
 CTGCATATGATGGCAACTATTAGTACTGAAACTTGGGCCTGAGTGTATTATTATGAAGCTTGGGCTGAGTGTTTTGGTATAAGT  
 TACTGAAACTATTAGTACATAGTGAGATGGGATTTCAAATAGTACAAAAGAATATATCATGTGATTAAATTAAGAA  
 TTCAAGGATAAGAGGTAGTGAATTAGAGTGACCAATTGCCCAATAAGCCAAGGACGGGCGGATTATCCATGTAGG  
 TGCACGTGTTCTTGTGTTTTACTTTTTGTTTATGCATGTTCTGGCTTAGTTCAGATTATTTCCCGCTATGCAATAA  
 TTTTATGCACATGATCCCAACAGATCAGCGGTGACATGATTTGTAGCCCTTGTGTGAGGATACCAATTAAGATTA  
 CATGGGATTGACGTGCAGTTGTAAAGGCCTACATCGATGGAGCAGAGCCTTGTCTGAAATGAGTAATCAAATATGT  
 GGTAACACCGTAGAGCTGTATGGCCAACTTTGTTTACACTTGGCAAAACAGGTCTGTTGTTGTTGTTGTTTACCAGAG  
 AAAGCAGGATAAACCCACGTTCCAAAACCTTTTGCCCTGGTTTTCCATATGCACGATTGTTGAATGAAGGCCGTTGA  
 GAAGAGCTATTGGAACCAAGTTTTTCGTTGGACGAGTGTTGTTGTTGTAATGAGGCTTCTAAGAGGGTTTTAGTAGCA  
 ACATTAGCATATGGGAACGTAGCATTTGCAGAGGCAGTACTGTGTTCAATCCACATTTTCATGAGTTAATAAGTGA  
 GCAGAAAGCTCTTCAAGGGACATTTGGGTCCACACGAGTAGTGACAGAAAGTGACAAAAGGATCAAATGAGATCC  
 TAGTCCAGCAAGCAGGAATGACAAATGCTCAAAATCATGGAGCGGTTGTCTGACAGGCCAATGTGTTTGGCAAC  
 TTGAATTTCTGAAAACTACAGAAATTTGGGAGTGACCTTTCTAAATGTTGTGGCAAGCTGAAATGAACATGCAATGA  
 TGCGTGCCATTGAATGAGAGGAAAACATCCTTTCAAGAGCAGCCATACTTTCGGCAGATGTGGCATAAAACCCACAA  
 CCTATGGGATTAACCTCTCTGAGAGAGACGATATTATAGCTCCAAGGATCAACTGATCCTGTTGAATCCAGAGTA  
 AATATCAGGATTTGCAATAAGGGCAGGGGCAGCAGAGCTGGAAGCAGCCAACGGGTTGGGGATGGTTTGTGGTG  
 GTGGTGGGTGAGATCCATCAATGAACCTGTAGACATTTTGTCCAAAAGGTAAGGTAGGATGACAGCTTTCAGGA  
 AAGATAGCTGTCTTGGGTTAATTTTACCCTGGCATGTTGGGAATTGTGATGAAGGCAGGAGGAGATGATTTTCAT  
 AATGGAGTCTGCAGGGGAAGAAGTGGTGGTAGACGACGTGGAATTGGCCATTTTGAAAAAATATTAGACCTAAG  
 TCTTGAGTAGTTTCAATACCATAAAGGATAAAACAATTTGATGGTGTAACTCTCTTAAATGATTCAAAGAGATT  
 ATAATGTATTAATAGAATATTTGCTGTACAGAGGTTTGTGTACAAATATAATCTACAACAACCTGATCATGTGTGAT  
 TTATCTTATCACGTTTATCTTCAACTATACACTGGGTTTGGAAATCTTGCTATCATCATTTTGAGTTAGAAAATCTTG  
 ATATGCTCTGTGATGAGTTTTAATATAATAAAAAATGTACTAAAAAAGTTGTACATGGAGTAAAAAGGAAAATGTC  
 TCTTTTTAATCATCTTTTCAACATGTCTGATCAATTTCTCATGTATTGTTCTTACTGCTCATGCATGATGAAGA  
 AATGGGATCAGTTGCTATTACGTATCTTTTGATGAACAAAGCTACTGCAGGGCTGAGAGAGAAAATACTGAGTTGGA  
 CAAAGAAATGATTATTGCTCATGCTCTGCAATTTGTAATTTCAAAGACAATATTGTTTGGAGTAGATAAATTAAGT  
 TTGCCAAAACCTGTGTGCCATGAAAATGACTTGCAAATCATTCAGTAGTAGCTGGTTTCTTTATACCATGGAGGCAAC  
 TTGTTTTTTCTTATAGTCATTGTTTTTTGACCATATATTTTTCTCTCCAGGTGATTGGATCTATTATTGGGGTTAAGC  
 TCATTATTGAGACTTTCCCTGAAATAGGACTCGGGCCACGTTTAAATGTTGACATCCATCGAGGTGCACTGACAG  
 AAGGTTTTTCTGACATTTGCAATTGTTATAATCTCTCTTGGTCTGGCCAGAAAAATTCCTGGAAGTTTTGTGATGA  
 AGACTTGGATCTCAAGCGTCTCCAAGTTAACTCTTCATATACTTGGCTCTGATCTGACTGGTGGTTGCATGAACC  
 CAGCTTCTGTAAGTATCTACTTTTTACTGATATATATATATATATATATATGACATATTTTTTTTTTCTATCATT  
 ACTTATATATATATATATATTTATATGCACATATTTTTTTTTTTTTTCTATCATTACTTTAGCTGCAGAAACTTAAATT  
 ATAGAAATTGATTTATGCAGGTGATGGGATGGGCATATGCTCGCGGGGATCACATAACCAAGGAGCATATACTTG  
 TATACTGGCTTGCCCCAATAGAGGCGACTCTGCTGGCGGTATGGATATTTAGGTTGGTAGTCCGGCCAATAAAAG  
 AGGAGAAAGCAAACGTGAAGAGTAAATCAGAATGATGAAGTTCCACTTGAATTCAGAGTGAGATTATCCAATG  
 AATCTGTTTCGCCCTTTGAGGAGGTGAAAAATGGTTAAAAAGATTATTAGAGTTGAAGGAATATACAGTACTTAATTTG  
 TACATCAATCTCTTTGGCTGCGCCATTGTAATATATCATTCATTGCATTTAGTAGATTACCGGATATGTTTCGCT  
 CCAAAAACCTCTCTTACCCCTCTGTGTTTCATGCAAAAAGAGATAAATGTGTGTACCCTTGCACACATGCTTTTGCT  
 TACAAGTGAAAGAAATTAGTATCTTGCACCTTAACGTGCTAGCATAAATATGAAGTTTTTTGAATTAATAACCATGAA  
 CTGCATATTGGGAGGTAACCCCTTTTTTTTGAAGGATTTAGCGACGGCAAAAGTTAAAAATATTGTAGTATGTAAC  
 ACACTAAGAACTGTCCCAAAAAATCCAGAAAATGAGAGCTTGAGAATCTGTAGGTGATGCACCTATTTTTTGAAG  
 CCAATGTTTACAACGATACGAGGTCTCCCTAGGAAGCAGGATCACAAAGAATGTTTCGTTCTTATAGCATCTTTAG  
 TATTTAGATGTGGGCATGGCATATATCATGTAGTAGAACAGTGAACTTTTTTCGAGTTCTCTCCTTACATAATTAG  
 AATGCGATAAAAAGTATGGTGTATAGCATGCTAACAAATGATAGTAAAGGCTCGTAGTGAAAACCATGTAATCGCTC  
 CATAATTCCTCTCTTTTTTTTTTTGTGTAAATATTGATATAGGTGGTGAATAAGGGAAATTTCTACCTGGTATCACT  
 GGGAGTGCCCTCTGGATTAAACGTAAATTTAGTTACAATTTTTTATAGCAATGAAACTAAAAATGAGTAGTAAACAGTG  
 TTGAGGGCTGATTTTTTCGTGGGACTCAAGAAGAAAGATTGACATGTGCTACAAAAATGAAAAGAGGGCCCAATACGA  
 AAGGAGCTTCCCCAAGCGAGTGTCACCGGGCTAGCAAAAAGAGGGGCTTACGTAGGCAACCGTCTAACCATTA  
 GATTGTTGTTGCATGATCAACAGGCCGTTGGACGAATGTAATCCCCACATAGTAGCATTACGAAAGCTTAAAGG  
 ATTGATGCTGCACGGTCAAAAGGCCGCTGAAACGGCCATGATTTCCGCCATATGACACCAAGCATGGCTTACGGCT  
 GAACAATTTGCAATTTGTTGAGAGCCCGTGTAAATACCTCCAAAAATAAAATAATTTTTTAAATAAATCTTTTT

**>BpeSIP2 ; 1**

ATGATAGGGAAGAAGTAATAAGAAAGAGAATTTCTCGTCTGAAAATGGCTTCGGCTGGTTTGCTGGTCTCAGATT  
TCATAATCTCTTTTCATGTGGGTATGGTCAGGGGTTCTGATTAAGATCTTTGTGTACAAAGTTTTGGAGTTGGGTC  
ATGAACCCAGTGGCGAGGTTATCAAGTGCCTCTCTCCATCGTCAACATGTTCTTTTTTCGCGTTTTTGGGTAAGA  
CTACCAAAGGTGGAGCCTACAATCCTCTCACCGTGTTCTGCTGGTGCCATTTCTGGGGATTTCAAGCGCTTCCTCT  
TTGACGCTGGTGCTAGAATCCCAGCTCAGGTGATTGGATCTATTATTGGGGTTAAGCTCATTATTGAGACTTTCC  
CTGAAATAGGACTCGGGCCACGTTTAAATGTTGACATCCATCGAGGTGCACTGACAGAAGGTTTTCTGACATTTG  
CAATTGTTATAATCTCTCTTGGTCTGGCCAGAAAAATTCCTGGAAGTTTTGTCATGAAGACTTGGATCTCAAGCG  
TCTCCAAGTTAACTCTTCATATACTTGGCTCTGATCTGACTGGTGGTTGCATGAACCCAGCTTCTGTGATGGGAT  
GGGCATATGCTCGCGGGGATCACATAACCAAGGAGCATATACTTGTATACTGGCTTGCCCCAATAGAGGCGACTC  
TGCTGGCGGTATGGATATTTAGGTTGGTAGTCCGGCCAATAAAAGAGGAGAAAGCAAACGTGAAGAAAAATGAGA  
GCTTGAGAATCTGT**TAG**

**>BpeSIP2 ; 1**

MASAGLLVSDFIISFMVWWSGVLIKIFVYKVLELGHEPSGEVIKCALSIIVNMFFFAFLGKTTKGGAYNPLTVFAG  
AISGDFKRFLFDAGARIPAQVIGSIIIGVKLI IETFP EIGLGPRLNVDIHRGALTEGFLTFAIVIISLGLARKIPG  
SFVMKTISSVSKLTLHLGSDLTGGCMNPASVMGWAYARGDHITKEHILVYWLAPIEATLLAVWIFRLVVRPIK  
EEKANVKKNESLRIC\*
