# Supplementary material for: Genome-Wide Identification, Structure Characterization, and Expression Pattern Profiling of the Aquaporin Gene Family in Betula pendula
Source: MDPI journal article supplement (doi:10.3390/ijms22147269), 2021-07-06
Supplement: s1 [file s1]

Figure S9

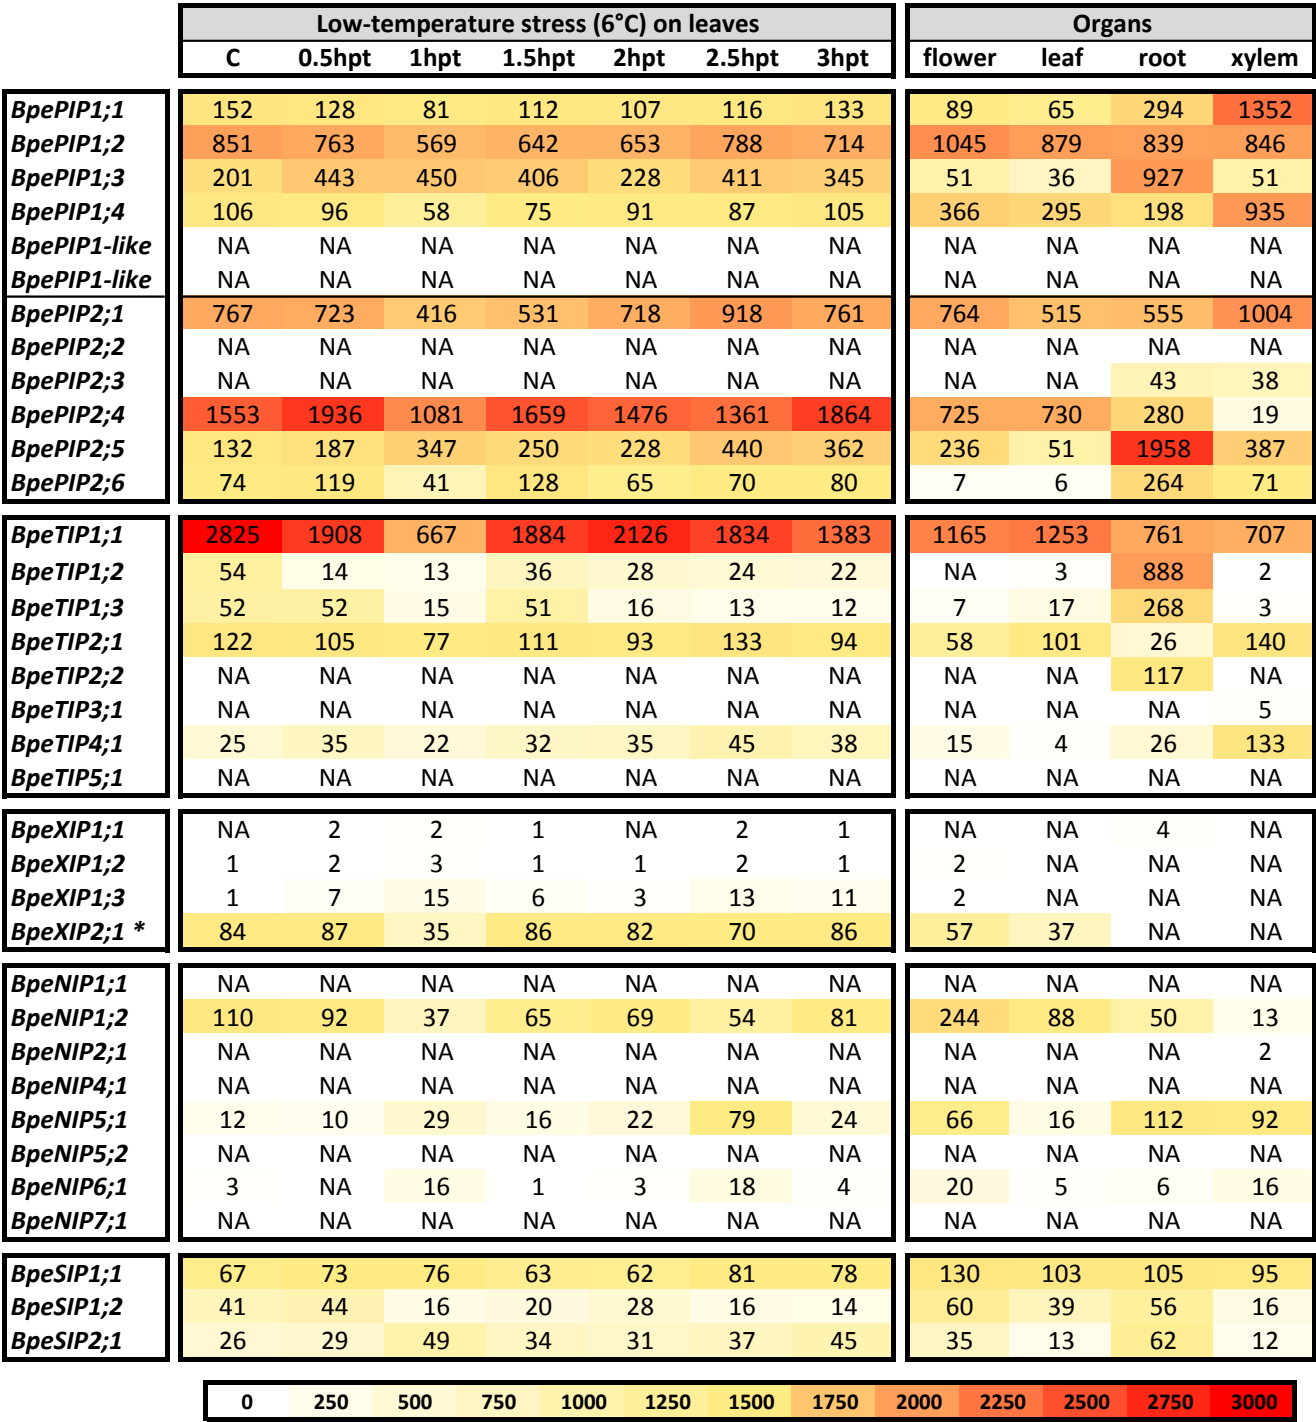

Figure S9. Trimmed mean of M-values (TMM) values related to the expression profiles of *BpeAQP* genes from *Betula pendula* in leaves under cold stress (6 °C), and in various organs (Flower, Leaf, Root and Xylem). The *BpeAQPs* are grouped by subfamily. The horizontal color scales at the bottom of the Figure represent the normalized expression of the aquaporins in terms of Trimmed mean of M-values (TMM). Expression levels are displayed by the depth of red and yellow. hpt, hours post treatment ; C, control sample which corresponds to the plants left at 25 °C. PIP, Plasma Intrinsic Protein ; TIP, Tonoplast Intrinsic Protein ; XIP, X-Intrinsic Protein ; NIP, Nodulin-like Intrinsic Protein ; SIP, small basic intrinsic protein. NA, TMM non detectable.
