# Supplementary material for: Genome-Wide Identification, Structure Characterization, and Expression Pattern Profiling of the Aquaporin Gene Family in Betula pendula
Source: MDPI journal article supplement (doi:10.3390/ijms22147269), 2021-07-06
Supplement: s1 [file s1]

Figure S11

(a) Distribution and homocedasticity

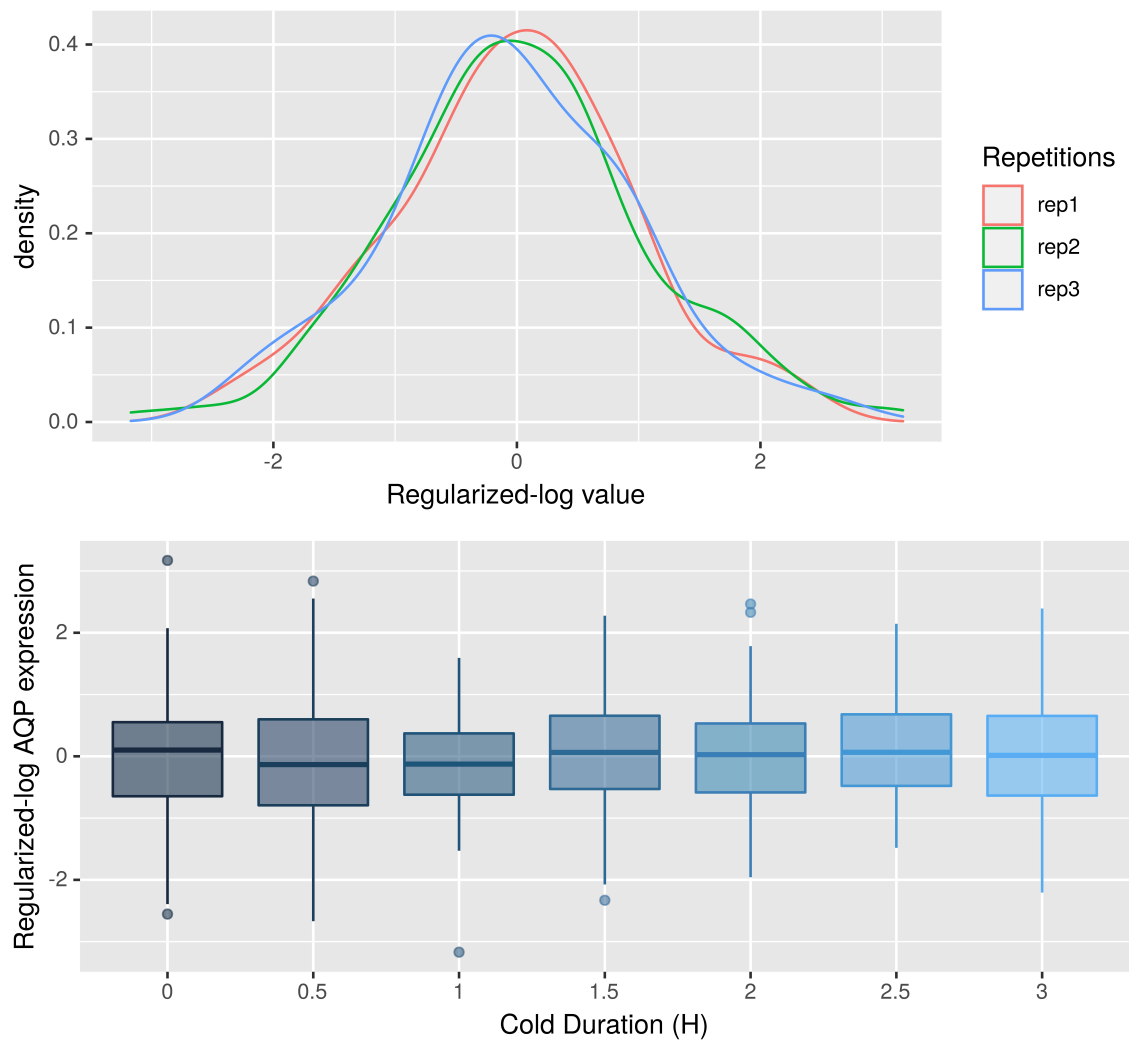

(b) Analysis of variance

| term      | df  | sumsq   | meansq  | statistic | p.value | contribVariance |
|-----------|-----|---------|---------|-----------|---------|-----------------|
| Hour      | 1   | 1.219   | 1.219   | 1.169     | 0.2802  | 50.4 %          |
| rep       | 2   | 0.2273  | 0.1136  | 0.109     | 0.8968  | 4.7 %           |
| Hour:rep  | 2   | 0.08567 | 0.04284 | 0.04108   | 0.9598  | 1.8 %           |
| Residuals | 388 | 404.6   | 1.043   |           |         | 43.1 %          |

**Figure S11. Exploratory data analysis of Cold Stress experiment.** (A) Normality of regularized-log AQP expression data and homoscedasticity. (B) Analysis of variance. The effect of Hour on the expression value is very weak (no significance), although it contributes half to the global variance. This is 43% of the variance which are not explained by the experimental design.
