# Supplementary material for: Genome-Wide Identification, Structure Characterization, and Expression Pattern Profiling of the Aquaporin Gene Family in Betula pendula
Source: MDPI journal article supplement (doi:10.3390/ijms22147269), 2021-07-06
Supplement: s1 [file s1]

**Table S1. Nomenclature of the *Bpe*AQPs from *Betula pendula*.**  
Genomic, CDS and protein sequences are detailed in FigureS1

|             | Name                | CoGe                     | Localization | Nucleotide location   | NCBI            |
|-------------|---------------------|--------------------------|--------------|-----------------------|-----------------|
| <b>PIP1</b> | <i>BpePIP1;1</i>    | Bpev01.c0190.g0072.m0001 | Contig190    | 850,536-851,776       | FXXK01000191.1  |
|             | <i>BpePIP1;2</i>    | Bpev01.c0170.g0038.m0001 | Chr14        | 5,426,780-5,430,337   | FXXK01000171.1  |
|             | <i>BpePIP1;3</i>    | Bpev01.c1699.g0001.m0001 | Chr5         | 1,627,018-1,628,297   | FXXK01001700.1  |
|             | <i>BpePIP1;4</i>    | Bpev01.c0027.g0083.m0001 | Chr5         | 22,880,015-22,885,763 | FXXK01000028.1  |
|             | <i>BpePIP1-like</i> | Bpev01.c0379.g0007.m0001 | Chr14        | 13,436,305-13,436,932 | FXXK01000380.1  |
|             | <i>BpePIP1-like</i> | Bpev01.c0007.g0002.m0001 | Chr5         | 15,083,781-15,094,079 | FXXK01000008.1  |
| <b>PIP2</b> | <i>BpePIP2;1</i>    | Bpev01.c0658.g0014.m0001 | Chr3         | 19090629-19091774     | FXXK01000659.1  |
|             | <i>BpePIP2;2</i>    | Bpev01.c0577.g0022.m0001 | Chr9         | 1,816,676-1,817,768   | FXXK01000578.1a |
|             | <i>BpePIP2;3</i>    | Bpev01.c0577.g0023.m0001 | Chr9         | 1,830,657-1,832,603   | FXXK01000578.1b |
|             | <i>BpePIP2;4</i>    | Bpev01.c0042.g0019.m0001 | Chr5         | 4,990,578-4,993,085   | FXXK01000043.1  |
|             | <i>BpePIP2;5</i>    | Bpev01.c0552.g0003.m0001 | Chr13        | 14,364,373-14,366,680 | FXXK01000553.1  |
|             | <i>BpePIP2;6</i>    | Bpev01.c0483.g0002.m0001 | Chr8         | 4,856,860-4,858,776   | FXXK01000484.1  |
| <b>TIP</b>  | <i>BpeTIP1;1</i>    | Bpev01.c0278.g0002.m0001 | Chr8         | 6,808,526-6,809,382   | FXXK01000279.1  |
|             | <i>BpeTIP1;2</i>    | Bpev01.c0396.g0015.m0001 | Chr13        | 17,015,493-17,016,481 | FXXK01000397.1  |
|             | <i>BpeTIP1;3</i>    | Bpev01.c2330.g0012.m0001 | Chr5         | 3,465,120-3,466,550   | FXXK01002331.1  |
|             | <i>BpeTIP2;1</i>    | Bpev01.c0665.g0011.m0001 | Chr5         | 13,209,768-13,211,363 | FXXK01000666.1  |
|             | <i>BpeTIP2;2</i>    | Bpev01.c0120.g0064.m0001 | Chr14        | 4,812,457-4,815,151   | FXXK01000121.1  |
|             | <i>BpeTIP3;1</i>    | Bpev01.c1026.g0003.m0001 | Chr7         | 20,005,317-20,006,689 | FXXK01001027.1  |
|             | <i>BpeTIP4;1</i>    | Bpev01.c0921.g0003.m0001 | Chr19        | 15,031,065-15,032,014 | FXXK01000922.1  |
|             | <i>BpeTIP5;1</i>    | Bpev01.c0477.g0022.m0001 | Contig477    | 209,208-211,230       | FXXK01000478.1  |
| <b>XIP</b>  | <i>BpeXIP1;1</i>    | Bpev01.c1577.g0026.m0001 | Chr3         | 19,989,890-19,991,672 | FXXK01001578.1b |
|             | <i>BpeXIP2-like</i> | Bpev01.c1577.g0027.m0001 | Chr3         | 19,966,597-19,968,432 | FXXK01001578.1a |
|             | <i>BpeXIP1;2</i>    | Bpev01.c1577.g0028.m0001 | Chr3         | 19,966,597-19,968,432 | FXXK01001578.1c |
|             | <i>BpeXIP2;1</i>    | Bpev01.c2937.g0004.m0001 | Contig2937   | 22,352-23,164         | FXXK01002938.1a |
|             | <i>BpeXIP1;3</i>    | Bpev01.c2937.g0004.m0001 | Contig2937   | 27,828-30,813         | FXXK01002938.1b |
| <b>NIP</b>  | <i>BpeNIP1;1</i>    | Bpev01.c0145.g0009.m0001 | Chr2         | 8,012,612-8,018,807   | FXXK01000146.1  |
|             | <i>BpeNIP1;2</i>    | Bpev01.c0230.g0002.m0001 | Contig230    | 17,343-19,985         | FXXK01000231.1  |
|             | <i>BpeNIP2;1</i>    | Bpev01.c0281.g0063.m0001 | Chr2         | 4,593,561-4,596,959   | FXXK01000282.1  |
|             | <i>BpeNIP4;1</i>    | Bpev01.c1162.g0002.m0001 | Chr1         | 16,645,942-16,653,541 | FXXK01001163.1  |
|             | <i>BpeNIP5;1</i>    | Bpev01.c1045.g0004.m0001 | Chr11        | 981,169-985,394       | FXXK01001046.1  |
|             | <i>BpeNIP5;2</i>    | Bpev01.c1084.g0010.m0001 | Chr6         | 19,692,291-19,696,739 | FXXK01001085.1  |
|             | <i>BpeNIP6;1</i>    | Bpev01.c0044.g0051.m0001 | Chr5         | 8,366,764-8,370,948   | FXXK01000045.1  |
|             | <i>BpeNIP7;1</i>    | Bpev01.c0330.g0006.m0001 | Chr1         | 34,485,381-34,487,761 | FXXK01000331.1  |
| <b>SIP</b>  | <i>BpeSIP1;1</i>    | Bpev01.c0082.g0002.m0001 | Chr8         | 23,172,529-23,181,063 | FXXK01000083.1  |
|             | <i>BpeSIP1;2</i>    | Bpev01.c0387.g0011.m0001 | Contig387    | 91,110-91,829         | FXXK01000388.1  |
|             | <i>BpeSIP2;1</i>    | Bpev01.c0212.g0010.m0001 | Chr8         | 12,136,640-12,142,650 | FXXK01000213.1  |

("Pseudogenes/truncated sequences" are in red)
