# Supplementary material for: Genome-Wide Identification, Structure Characterization, and Expression Pattern Profiling of the Aquaporin Gene Family in Betula pendula
Source: MDPI journal article supplement (doi:10.3390/ijms22147269), 2021-07-06
Supplement: s1 [file s1]

**Figure S7. Specificity determining positions (SDP) analysis of the *Bpe*AQPs transporting non-aqua substrates from *Betula pendula*.** SDP were predicted from alignments with putative amino acid sequences of the AQPs predicted to transport non-aqua substrates (marked in red). Multiple alignments were performed using ClustalX. The SDPs are highlighted in yellow. The Genbank accession numbers of the representative sequences used for alignments: *At*PIP1;2 (Q06611), *At*PIP2;1 (P43286), *At*PIP2;4 (Q9FF53), *At*TIP1;1 (P25818), *At*TIP1;2 (Q41963), *At*TIP2;1 (Q41951), *At*TIP2;3 (Q9FGL2), *At*TIP4;1 (O82316), *At*NIP1;2 (Q8LFP7), *Cp*NIP1 (CAD67694), *Gm*NOD26 (P08995), *Hv*PIP1;3 (BAA23745), *Hv*PIP1;4 (BAF33068), *Hv*PIP2;1 (BAA23744), *Nt*AQP1 (O24662), *Nt*TIPa (Q9XG70), *Os*NIP2;1 (Q6Z2T3), *Ta*TIP2;1 (AAS19468), *Ta*TIP2;2 (AAS19469), *Zm*PIP1;1 (Q41870), *Zm*PIP1;5 (Q9AR14).

\*The *Bpe*XIP2;1 sequence used for the analyses was the redefined sequence (redefinition detailed in the Figure S4)

## Ammonia transporters

### TIP

|                  | 110               | 120                                                | 130                                                       | 140                                     | 150                                | 160                                    | 170                       | 180        | 190      | 200 |
|------------------|-------------------|----------------------------------------------------|-----------------------------------------------------------|-----------------------------------------|------------------------------------|----------------------------------------|---------------------------|------------|----------|-----|
| <i>AtTIP2;1</i>  | VNP               | AVTFGLAVGGQITVITGVFYWIAQLL                         | GSTAACFLLKYVTGGGLAVPTHSV                                  | AAGLGSIEGVVMEIIITFALVYTVYATAADPKKGS     | SLGTIAPLAIGLIV                     |                                        |                           |            |          |     |
| <i>AtTIP2;3</i>  | LNP               | AVTLGLAIGGNITLITGFFYWIAQCLGSIVACLLLVFVTNGKSVPTHGVS | SAGLGAVEGVVMEIIVTFALVYTVYATAADPKKGS                       | SLGTIAPIAIGFIV                          |                                    |                                        |                           |            |          |     |
| <i>TaTIP2;1</i>  | VNP               | AVTFGLALGGQITILTGIFYWVAQLLGAIVGAFLVQFCTG-VATP      | THGL-SGVGAFEGVVMEIIVTFGLVYTVYATAADPKKGS                   | SLGTIAPIAIGFIV                          |                                    |                                        |                           |            |          |     |
| <i>TaTIP2;2</i>  | VNP               | AVTFGLALGGQITILTGIFYWVAQLLGAIVGAFLVQFCTG-VATP      | THGL-SGVGAFEGVVMEIIVTFGLVYTVYATAADPKKGS                   | SLGTIAPIAIGFIV                          |                                    |                                        |                           |            |          |     |
| <i>GmNOD2;6</i>  | FNP               | AVTIAFASTRRFPLIQVPAYVVAQLLGSILASGTLRLLFMGNHDQESG   | TVPNGTNLQAFVFEFIMTFFLMFVICGVATDNR--AVGEFAGIAIGSTL         |                                         |                                    |                                        |                           |            |          |     |
| <i>BpeTIP1;1</i> | VNP               | AVTFGAFIGGNITLLRGIVYWIAQLLGS                       | TVACLLLKFFATNGLTTSAFSLSSGVGVWNAFVLEIVMTFGLVYTVYATAVDPKRGS | VGVIAPIAIGFIV                           |                                    |                                        |                           |            |          |     |
| <i>BpeTIP1;2</i> | VNP               | AVTFGAFGLGGHISLIRGLLYWVAQLLGS                      | VVACLLLKFFSTGGLET                                         | PAFSLSSDVS                              | VWNAV                              | VLEIVMTFGLVYTVYATAVDPKKGNIGILAPIAIGLIV |                           |            |          |     |
| <i>BpeTIP1;3</i> | VNP               | AVTFGAFIGGNITLLRTILYWIAQLLGS                       | VVACLLLKFFATGGLET                                         | SAFSLSSGVSVWNAV                         | VFEIVMTFGLVYTVYATAVDPKKGNVGT       | VAPIAIGFIV                             |                           |            |          |     |
| <i>BpeTIP2;1</i> | VNP               | AVTFGLALGGQITLLTGIFYWIAQLLGS                       | IAACFLLKAVTG-LAIP                                         | THSVASGVGAIEGVVMEIIITFALVYTVYATAADPKKGS | SLGTIAPIAIGFIV                     |                                        |                           |            |          |     |
| <i>BpeTIP2;2</i> | LNP               | AVTFGLALGGNITILTGIFYWIAQCLGSIVACLLLQFVTNGLSIP      | THGVASGMNAVEGVVMEIIVTFALVYTVYATAADPKKGS                   | LGIIAPIAIGFIV                           |                                    |                                        |                           |            |          |     |
| <i>BpeTIP3;1</i> | VNP               | AVTFGTLLGGRISVLR                                   | AVFYWIAQLLGA                                              | VASLLRLVTNNMRPVGFYVTS                   | SGVGEWHGLIFEIVMTFTLVYTVFATAIDPKRGS | SLGTIAPLAIGFIV                         |                           |            |          |     |
| <i>BpeTIP4;1</i> | LNP               | AVTLGLLAGGHITIFRSFLY                               | WIDQLLAASAACII                                            | LYITGGGLTTP                             | IHSLASGVGYLQGV                     | IWEVILTFSL                             | LFTVYATIVDPKKGALDGLGPTLTG | FVV        |          |     |
| <i>BpeTIP5;1</i> | VNP               | AVTFGM                                             | AVGGHISVPTALFYWLSQMLASV                                   | MASLLLKMTVVGQHVPT                       | YVIAEEMTGFGASLMEGVLT               | FALVYTVYA-AGDTRRGT                     | MGAIGPIAIGSIA             |            |          |     |
|                  | 210               | 220                                                | 230                                                       | 240                                     | 250                                | 260                                    | 270                       |            |          |     |
| <i>AtTIP2;1</i>  | GANILAAGPFSGGSMNP | ARSFGPAVAAGDFSGHWVYWG                              | PLIGGGLAGLIYGNVFMG----                                    | SSEHVPLASADF-----                       |                                    |                                        |                           |            |          |     |
| <i>AtTIP2;3</i>  | GANILAAGPFSGGSMNP | ARSFGPAVVS                                         | GDLSQIWIYWVG                                              | PLVGGALAGLIYGDVFIG----                  | SYEAVETREIRV-----                  |                                        |                           |            |          |     |
| <i>TaTIP2;1</i>  | GANILVAGPFSGGSMNP | ARSFGPAVASGDF                                      | TNIWVYWAGPLIGGGLAGV                                       | VYRYLYMC----                            | D-DHSSVAGNDY-----                  |                                        |                           |            |          |     |
| <i>TaTIP2;2</i>  | GANILVAGPFSGGSMNP | ARSFGPAVASGDF                                      | TNIWVYWAGPLIGGGLAGV                                       | VYRYVYMC----                            | D-DHSSVAGNDY-----                  |                                        |                           |            |          |     |
| <i>GmNOD2;6</i>  | LLNVIIGGPVTGAS    | MNP                                                | ARSLGPAFVHGEYEG                                           | IWIYLLAPVVGAIAGAWV                      | YNIVRYT----                        | DKPLSETTKSASFLKGRAASK                  |                           |            |          |     |
| <i>BpeTIP1;1</i> | GANILAGGAFDGAS    | MNP                                                | AVSFGPALVSWT                                              | WENHWVYWAGPLIGGGLAGLV                   | YEFFFFI----                        | SHNTHEQLPTTDY-----                     |                           |            |          |     |
| <i>BpeTIP1;2</i> | GANILAGGAFDGAS    | MNP                                                | AVSFGPAVVS                                                | WSWDNHVYWG                              | PLIGSAIAAIVYELIFI----              | SPNTHEPLPATDF-----                     |                           |            |          |     |
| <i>BpeTIP1;3</i> | GANILVGGAFDGAS    | MNP                                                | AVSFGPAVVS                                                | SWTNHWVYWL                              | GPMVGAIAAIVYDTLFIG----             | EPTHEPLPTNDF-----                      |                           |            |          |     |
| <i>BpeTIP2;1</i> | GANILAAGPFSGGSMNP | ARSFGPAVASGDF                                      | HDNWIYWAGPLVGGGLAGLIYGNV                                  | FMY----                                 | SQHAPLTN-DF-----                   |                                        |                           |            |          |     |
| <i>BpeTIP2;2</i> | GANILAAGPFSGGSMNP | ARSFGPAVVS                                         | GDFSQNIWYWG                                               | PLIGGGLAGLVYGGIFIG----                  | SYEPLPPSQDYA-----                  |                                        |                           |            |          |     |
| <i>BpeTIP3;1</i> | GANILAGGPF        | DGACMNP                                            | ARAFGPALVGRWRN                                            | HWIYWGP                                 | LLGGGLAGLVYEY                      | MPV                                    | IPTEVPHHTHQP              | LAP        | EDY----- |     |
| <i>BpeTIP4;1</i> | GANILAGGAFSGAS    | MNP                                                | ARSFGPALISGD                                              | WDTHWVYWG                               | PLIGGGLAGFIYENFF                   | FIVR---                                | SHVPIPT                   | EEERY----- |          |     |
| <i>BpeTIP5;1</i> | GANVLAAGPFSGGSMNP | ACAFGSAV                                           | TAGSFKNQAVYWG                                             | PLIGAAAAGLVYDN                          | VVFPS---                           | SQAPEGVGV-----                         |                           |            |          |     |

## NIP

|                   |                                                                                                     |                                              |                         |                         |     |     |     |     |     |     |
|-------------------|-----------------------------------------------------------------------------------------------------|----------------------------------------------|-------------------------|-------------------------|-----|-----|-----|-----|-----|-----|
|                   | 110                                                                                                 | 120                                          | 130                     | 140                     | 150 | 160 | 170 | 180 | 190 | 200 |
| <i>At</i> TIP2;1  | KLTSDAALDTPGLVAIAVCHGFALFVAVAIGANISGGHVNPAVTFGLAVGGQITVITGVFYWIAQLLGSTAACFLLKYVTGGGLAVP             | THSV                                         | AAGLGSIEGV              |                         |     |     |     |     |     |     |
| <i>At</i> TIP2;3  | KLTSDGALDPAGLVAIAIAHAFALFVGVSIAANISGGHLNPAVTLGLAIGGNITLITGFFYWIAQCLGSIVACLLLVFVTNGKSVPT             | THGV                                         | SAGLGAVEGV              |                         |     |     |     |     |     |     |
| <i>Ta</i> TIP2;1  | KVSGGAPLDPSGLIAVAICHGFGFLFVAVAIGANISGGHVNPAVTFGLALGGQITILTGFIFYWVAQLLGAIVGAFLVQFCT-GVATP            | THGLS                                        | -GVGAFEGV               |                         |     |     |     |     |     |     |
| <i>Ta</i> TIP2;2  | KVSGGAPLDPSGLIAVAICHGFGFLFVAVAIGANISGGHVNPAVTFGLALGGQITILTGFIFYWVAQLLGAIVGAFLVQFCT-GVATP            | THGLS                                        | -GVGAFEGV               |                         |     |     |     |     |     |     |
| <i>Gm</i> NOD2;6  | NYYN-----MITFPGIAIVWGLVLTVLVYTVGHISGGHFNPAVTIAFASTRRFPLIQVPAYVVAQLLGSILASGTLRLLFMGNHDOF             | SGTVPNGTNLQAF                                |                         |                         |     |     |     |     |     |     |
| <i>Bpe</i> NIP1;1 | IYGS-----VTFPGICVTWGLIVTVMIIYTVGHISGAHFNPAVTITSAIFRRFPYKEVPLYIAAQLMGSILASGTLALVFDVTPDAY             | FGTVP                                        | TSNSQSL                 |                         |     |     |     |     |     |     |
| <i>Bpe</i> NIP4;1 | IYGS-----VSFPGICVVWGLIVMVMISVGHISGAHFNPAVTITFAIFRRFPLKQVPLYIVAQMIGSTLASATLCAFPVDKKSFFGT             | APVGS                                        | NFQAL                   |                         |     |     |     |     |     |     |
| <i>Bpe</i> NIP1;2 | GNDK-----VVTAPGVSIVWGLAVMVLVYSVGHISGAHFNPAVTIAFATCRRFPWKQVPAYVSAQVLGSTMASGTLRLIFNGHENR              | FGTIP                                        | PAGSNLQSF               |                         |     |     |     |     |     |     |
| <i>Bpe</i> NIP2;1 | ADEN-----KVSCLAASVAGGLIVTVMIIYAVGHISGAHFNPAVTIAFAAVRHFPWKQVPLIAAAQLAGAISAAFTLRVILNPIKE              | -LGTT                                        | SPTGTEIEAL              |                         |     |     |     |     |     |     |
| <i>Bpe</i> NIP5;1 | KYNG-----AESLIGNAACAGLAVMVMVLSTGHISGAHFNPSVTIAFATLRHFPWLQVPAYIAAQVSGSICASFALKGVFHPYMSG              | -GVTVP                                       | SVTEGQAF                |                         |     |     |     |     |     |     |
| <i>Bpe</i> NIP5;2 | KYQG-----AETLIGSAACAGLAVMVMVLSTGHISGAHFNPSVTIAFAALRHFPWVQVPGYLVAQVVSASICAFAFALKGVFHPMSG             | -GVTVP                                       | PAVGIGQAF               |                         |     |     |     |     |     |     |
| <i>Bpe</i> NIP6;1 | KTHG-----SETLLGCAASSGLAVMVMVLSTGHISGAHFNPAVTIAFAALRHFPWKHVPYIGAQVVASFCAAFALKGVFHPIMGG               | -GVTVP                                       | PSGSYQAF                |                         |     |     |     |     |     |     |
| <i>Bpe</i> NIP7;1 | LSKG-----EVGLLEYAATAGLTVVVVIFSIGHISCAHVNPAVTIAFATFGHFPWSKVPLYILAQTLGSVLATCIGQSVYD-VKSEFMT           | TRPLR                                        | GCSSAF                  |                         |     |     |     |     |     |     |
|                   | 210                                                                                                 | 220                                          | 230                     | 240                     | 250 | 260 | 270 | 280 | 290 | 300 |
| <i>At</i> TIP2;1  | VMEIIITFALVYTVYATAADPKKGSLSGTIAPLAIGLIVGANILAAGPFSGGSMNPARSFGP                                      | AVAAAGDFSGH                                  | VWVWG                   | PLIGGGLAGLIYGNVFMGSSEHV |     |     |     |     |     |     |
| <i>At</i> TIP2;3  | VMEIVVTFALVYTVYATAADPKKGSLSGTIAPIAIGFIVGANILAAGPFSGGSMNPARSFGP                                      | AVVSGDLSQIWIYWG                              | PLVGGALAGLIYGDVFIGSYEAV |                         |     |     |     |     |     |     |
| <i>Ta</i> TIP2;1  | VMEIIVTFGLVYTVYATAADPKKGSLSGTIAPIAIGFIVGANILVAGPFSGGSMNPARSFGP                                      | AVASGDFTNIWVYWG                              | PLIGGGLAGVVYRYLYM-CDDHS |                         |     |     |     |     |     |     |
| <i>Ta</i> TIP2;2  | VMEIIVTFGLVYTVYATAADPKKGSLSGTIAPIAIGFIVGANILVAGPFSGGSMNPARSFGP                                      | AVASGDFTNIWYWG                               | PLIGGGLAGVVYRYVYM-CDDHS |                         |     |     |     |     |     |     |
| <i>Gm</i> NOD2;6  | VFEFIMTFFLMFVICGVATDNR--AVGEFAGIAIGSTLLNVIIGGPVTGASMNPARSLGPAFVHGEYEGIWIIYLLAPVVGAIAGAWVYNIVRYTD    | KPLS                                         |                         |                         |     |     |     |     |     |     |
| <i>Bpe</i> NIP1;1 | VLEILCSFLLMFVISGVTTDSR--AISEVAGIAVGMTILLNVFIAGPVSGASMNPARSIRPAVIKHVYKGLWVYIVGPIIGTIAGAFAYNLIRST     | DKPLQ                                        |                         |                         |     |     |     |     |     |     |
| <i>Bpe</i> NIP4;1 | IIIEIIISFLLMFVICGVATDNR--AIGELAGIAVGMTITLNVFVAGPVSGASMNPARSIGPALLTHMYKGLWIIYILGPLAGTILGGFAYNMIRFT   | DKPLR                                        |                         |                         |     |     |     |     |     |     |
| <i>Bpe</i> NIP1;2 | ALEFIIITFYLMFVISGVATDNR--AIGELAGLAVGSTILLNVFAGPVSGASMNPARSLGPAIVHNKYESIWVYLVATTLGAIAGGMVYNIIRFT     | DKPLR                                        |                         |                         |     |     |     |     |     |     |
| <i>Bpe</i> NIP2;1 | VMEIVVTFVTMMFTASAVATDTK--AIGELAGLAVGSAVCITSILAGPISGGSMNPARTIGPAIASASYKGIWVYLVGPVTGTLLGAWSYKLIRVS    | DEPLY                                        |                         |                         |     |     |     |     |     |     |
| <i>Bpe</i> NIP5;1 | ALEFIIITFNLLFVVTAVATDTR--AVGELAGIAVGATVLVNILVAGPSSGGSMNPVRTLGPAIAAGNYKSLWIIYLVAPTTLGALTGAGVYTAVKLRE | DEV-                                         |                         |                         |     |     |     |     |     |     |
| <i>Bpe</i> NIP5;2 | ALEFIVTFTLLFVITAVATDTC--AVGEFAGIAIGGTVMNLILVAGTTTGASMNPNVRTIGPAIAAGTYKGFWIYMVAPILGALAGAGTYTFVKLAED  | GV-                                          |                         |                         |     |     |     |     |     |     |
| <i>Bpe</i> NIP6;1 | ALEFIIISFNLMFVVTAVATDTR--AVGELAGIAVGATVMLNILIAGPTTGASMNPNVRTLGPAAANNYKAIWVYLTAPILGALCGAGIYSAVKLPEED | DGG                                          |                         |                         |     |     |     |     |     |     |
| <i>Bpe</i> NIP7;1 | WVELIATFIIMFLAASVTYQHQ--SVGHLSGFVVGIAISLAV----PVSGGSMNP                                             | ARSLGPAIISGKFNDIWIYMTAPTIGAVAGALLFRILRLQQRRC |                         |                         |     |     |     |     |     |     |

|                   | 310                  | 320 |
|-------------------|----------------------|-----|
| <i>GmNOD2</i> ;6  | ETTKS-ASF-LKGRAASK-  |     |
| <i>AtTIP2</i> ;1  | PLASADF-----         |     |
| <i>AtTIP2</i> ;3  | ETREIRV-----         |     |
| <i>TaTIP2</i> ;1  | SVAGNDY-----         |     |
| <i>TaTIP2</i> ;2  | SVAGNDY-----         |     |
| <i>BpeNIP1</i> ;1 | HLPRSTGSF-LRL-----   |     |
| <i>BpeNIP4</i> ;1 | ELTKS-GSF-LKTCPKNGF- |     |
| <i>BpeNIP1</i> ;2 | EITKS-GSF-LKASRNNNSV |     |
| <i>BpeNIP2</i> ;1 | PMSKEGHSKEMVNKYPNNSV |     |
| <i>BpeNIP5</i> ;1 | --EAPRQVRSFRR-----   |     |
| <i>BpeNIP5</i> ;2 | --EGQDN-----         |     |
| <i>BpeNIP6</i> ;1 | IHEKPSTTSSFRR-----   |     |
| <i>BpeNIP7</i> ;1 | NPTS-----            |     |

## Boric Acid Transporters

**PIP1**

10 20 30 40 50 60 70 80 90 100

*HvPIP1;3* MEGKEEDVRLGANRYSEHQPIGTAAQGGGADEKDYKEPPAPFFFEAGELTSWSFYRAGIAEFLATFLFLYISVLTVMGVGNPSGSKCGTVGIQGIAWSF  
*HvPIP1;4* MEGKEEDVRLGANRYSERQPIGTAAQGGGADEKDYKEPPAPLFEEELSSWSFYRAGIAEFLATFLFLYISVLTVMGVGNPSGSKCGTVGIQGIAWSF  
*ZmPIP1;1* MEGKEEDVRLGANKFSEHAI GTAAQGTD--DKDYKEPPAPLFEPEGELKSWSFYRPGIAEFVATFLFLYISILTVMGVSKSTS--KCATVGIQGIAWSF  
*OsNIP2;1* MASNNSRTNSRANYSNEI HDLST-VQNGTMTPTMYGKAIADFFPPHLL-----KKVVSEVVATFLLVFMT-CGAAGISGSD----LSRISQLGQSIAG  
*BpePIP1;1* MEGKDEDVRLGANRYRERQPIGTAAQSQD-T-KDYQEPPAAPFFEPGELSSWSFYRAGIAEFVATFLFLYITVLTVMGVSKSPS--KCSTVGIQGIAWAF  
*BpePIP1;2* MEGKEEDVRLGANKYTERQPLGTAAQTD---KDYKEPPAPLFEPEGELCSWSFYRAGIAEFVATFLFLYITVLTVMGVKRSSS--VCASVGIQGIAWAF  
*BpePIP1;3* MEGKEEDVRLGANKFPERQPIGTAAQSQD-EGKDYIEPPAPLFEPESELTSWSFYRAGIAEFVATFLFLYITVLTVMGVAKSPS--KCSTVGIQGIAWAF  
*BpePIP1;4* MEGKEEDVKVGASKFPERQAIGTSAQTD---KDYKEPPAPLFEPEGELQSWSFWRAGIAEFIATFLFLYITLLTVMGVSRAPS--KCASVGVQGIAWAF

110 120 130 140 150 160 170 180 190 200

*HvPIP1;3* GGMIFVLVYCTAGISGGHINPAVTFGLFLARKLSLTRAVFYIVMQCLGAICGAGVVKGFQTTLYQGNGGGANSVAAGYTKGDGLGAEIVGTFVLVYTVFS  
*HvPIP1;4* GGMIFVLVYCTAGISGGHINPAVTFGLFLARKLSLTRAVFYIVMQCLGAICGAGVVKGFQTTLYQGNGGGANSVAAGYTKGDGLGAEIVGTFVLVYTVFS  
*ZmPIP1;1* GGMILALVYCTAGISG-HINPAVTFGLFLARKLSLTRAVFYIIMQCLGAICGRGVVKGFQQGLYMGNGGRRNVVAPGYTKGDGLGAEIVGTFILVYTVFS  
*OsNIP2;1* GLIVTVMIIYAVGHISGAHMNPAVTLAFAVFRHFPWQVPPFYWAAQFTGAICASFVLKAVIHPVDVI--GTTTPVGPHW---HSLVVEVIVTFNMMFVTLA  
*BpePIP1;1* GGMIFALVYCTAGISGGHINPAVTFGLFLARKLSLTRAVFYIVMQCLGAICGAGVVKGFQKNQYERLGGGANTISSGYSKGDGLGAEIVGTFVLVYTVFS  
*BpePIP1;2* GGMIFALVYCTAGISGGHINPAVTFGLLLARKLSLTRAVFYIIMQCLGAICGAGVVKGFQKTPFEINGGGANVVNHGYTKGDGLGAEIVGTFVLVYTVFS  
*BpePIP1;3* GGMIFALVYCTAGISGGHINPAVTFGLFLARKLSLTRALFYIVMQCLGAICGAGVVKGFQKSQYEILGGGANFVNPGYTKGDGLGAEIVGTFVLVYTVFS  
*BpePIP1;4* GGMIFALVYCTAGISGGHINPAVTFGLFLARKLSLTRALFYIVMQCLGAICGAGVVKGFQKTQYERVGGGANVVNHGYSKGDGLGAEIVGTFVLVYTVFS

210 220 230 240 250 260 270 280 290 300

*HvPIP1;3* ATDAKRSARDSHVPILAPLPIGFAVFLVHLATIPITGTGINPARSLGAAI IYNKKQAWDDHWIFWVGPFIGAALAA-IYHVVVIRAI PFKSRGIGAALA//  
*HvPIP1;4* ATDAKRSARDSHVPILAPLPIGFAVFLVHLATIPITGTGINPARSLGAAI IYNKKQAWDDHWIFWVGPFIGAALAA-IYHVVVIRAI PFKSRDIGAALA//  
*ZmPIP1;1* ATDAKRRARDSHVPILAPLPIGFAVFLVHLATMGITGTGINPARSLGAAV IYNQHAWADHWIFWVGPFIGAALAA-IYHQVIRAI PFKSRS-----  
*OsNIP2;1* VATDTRAVGE-----LAGLAVGSAVCITSIFAGAISGGSMNPARTLGPALASNK---FDGLWIFYLGPVMTGLSGAWTYTFIRFEDTPKEGSSQKLSSF//  
*BpePIP1;1* ATDAKRNARDSHVPILAPLPIGFAVFLVHLATIPITGTGINPARSLGAAI IYNKEQAWNNHWIFWVGPFIGAALAA-LYHQIVIRAI PFKSK-----  
*BpePIP1;2* ATDAKRNARDSHVPILAPLPIGFAVFLVHLATIPITGTGINPARSLGAAI IYNKDHWADHWIFWVGPFIGAALAA-VYHQIVIRAI PFKARG-----  
*BpePIP1;3* ATDAKRSARDSHVPILAPLPIGFAVFLVHLATIPITGTGINPARSLGAAI IYNRDRADDDHWIFWVGPFIGAALAA-LYHQVVIRAI PFKSK-----  
*BpePIP1;4* ATDAKRNARDSHVPILLAPLPIGFAVFLVHLATIPITGTGINPARSLGAAI IYNKDHWADDDQWIFWVGPFIGAALAA-LYHQIVIRAMP FKTRA-----

# NIP

|                   |                             |                                                              |                                                    |                             |                             |                                        |                            |         |     |     |
|-------------------|-----------------------------|--------------------------------------------------------------|----------------------------------------------------|-----------------------------|-----------------------------|----------------------------------------|----------------------------|---------|-----|-----|
|                   | 110                         | 120                                                          | 130                                                | 140                         | 150                         | 160                                    | 170                        | 180     | 190 | 200 |
| <i>Hv</i> PIP1;3  | SGSKCGTVGIQGI               | AWSF                                                         | GGMIFVLVYCTAGIS                                    | GGHINPAVTFGLFLARKLSL        | TRAVFYIVMQCLGAICGAGVVKG     | FQTTLYQGN                              | GGGANSVAAGYTKGDG           |         |     |     |
| <i>Hv</i> PIP1;4  | SGSKCGTVGIQGI               | AWSF                                                         | GGMIFVLVYCTAGIS                                    | GGHINPAVTFGLFLARKLSL        | TRAVFYIVMQCLGAICGAGVVKG     | FQTTLYQGN                              | GGGANSVAAGYTKGDG           |         |     |     |
| <i>Zm</i> PIP1;1  | STSKCATVGIQGI               | AWSF                                                         | GGMILALVYCTAGIS                                    | G-HINPAVTFGLFLARKLSL        | TRAVFYIIMQCLGAICGRGVVKG     | FQQGLYMGN                              | GGRRNVVAPGYTKGDG           |         |     |     |
| <i>Os</i> NIP2;1  | GSDL-SRISQLGQSI             | AGGLIVTVM                                                    | IYAVGHI                                            | SGAHMNP                     | AVTLAFAVFRHFPW              | IQVPFYWAAQFTGAICASFVLKA                | ----VIH-PVDVIGTTTPV        | GPHWHS  |     |     |
| <i>Bpe</i> NIP1;1 | KIYG-SV-TFPGICV             | TWGLIVTVM                                                    | IYTVGHI                                            | SGAHFNPAVTITSAIFRRFPYKEV    | PLYIAAQLMGSILASGTLAL        | ----VFDVTPDAYFGTVPTGS                  | NSQS                       |         |     |     |
| <i>Bpe</i> NIP1;2 | LGND-KVV                    | TAPGVSIVWGLAVMVLVYSV                                         | GHISGAHFNPAVTIAFATCRRFPWKQVPAYVSAQVLGSTMASGTLRL    | ----IFNGHENRFVGTIPAGS       | NLQS                        |                                        |                            |         |     |     |
| <i>Bpe</i> NIP2;1 | AAD                         | E-NKVS                                                       | KLAASVAGGLIVTVM                                    | IYAVGHI                     | SGAHMNP                     | AVTLAFAAVRHFPWKQVPLYAAAQLAGAI          | SAAFTLRV----ILN-PIKELGTTSP | TGTEIEA |     |     |
| <i>Bpe</i> NIP4;1 | KIYG-SV-SFP                 | GCIVWGLIVMVM                                                 | IYSVGHISGAHFNPAVTITFAIFRRFP                        | LKQVPLYIVAQMIGSTLASATLCA    | ----LFPVDKKSFFGTAPVGS       | NFQA                                   |                            |         |     |     |
| <i>Bpe</i> NIP5;1 | QKYN-GAES                   | LIGNAACAGLAVM                                                | VVLSTGHISGAHLNPSLTIAFATLRHFPWLQVPAYIAAQVSGSICASFAL | KG----VFH-PYMSGGVTVPSVTEGQA |                             |                                        |                            |         |     |     |
| <i>Bpe</i> NIP5;2 | EKYQ-GAET                   | LIGSAACAGLAVMAMVLSTGHISGAHFNPSVTIAFAALRHFPWVQVPGYLVAQVSASICA | AAFTLKG----VFH-PFMSGGVTVPAVGIGQA                   |                             |                             |                                        |                            |         |     |     |
| <i>Bpe</i> NIP6;1 | QKTH-GSET                   | LLGCAASSGLAVM                                                | VVLSTGHISGAHLNPALTIAFAALKHFPWKHVP                  | PMYIGAQVVASFCAAFAL          | KG----IFH-PIMGGGVTVPSGSYGQA |                                        |                            |         |     |     |
| <i>Bpe</i> NIP7;1 | QLSK-GEV                    | GLLEYAATAGLTVVVVIFSIGHISCAHVNPAVTIAFATFGHFPWSKVPLYILAQT      | LGSVLATCIGQS----VYD-VKSEFMTTRPLRGCSSA              |                             |                             |                                        |                            |         |     |     |
|                   | 210                         | 220                                                          | 230                                                | 240                         | 250                         | 260                                    | 270                        | 280     | 290 | 300 |
| <i>Hv</i> PIP1;3  | LGAEIVGTFVLVYTVFSATDAKRSARD | SHVPILAPLP                                                   | IGFAVFLVHLATIPITGTGINPARSLGAAIIYNKKQAWDDHWIFWVGPF  | IGAALAA-IYHV                | VV                          |                                        |                            |         |     |     |
| <i>Hv</i> PIP1;4  | LGAEIVGTFVLVYTVFSATDAKRSARD | SHVPILAPLP                                                   | IGFAVFLVHLATIPITGTGINPARSLGAAIIYNKKQAWDDHWIFWVGPF  | IGAALAA-IYHV                | VV                          |                                        |                            |         |     |     |
| <i>Zm</i> PIP1;1  | LGAEIVGTFILVYTVFSATDAKRRARD | SHVPILAPLP                                                   | IGFAVFLVHLATMGITGTGINPARSLGAAVIYNQHHAWADHWIFWVGPF  | IGAALAA-IYHQVI              |                             |                                        |                            |         |     |     |
| <i>Os</i> NIP2;1  | LVVEVIVTFNMMFVTLAVATDTRAVGE | -----LAGLAVGS                                                | AVCITSIFAGAI                                       | SGGSMNPARTLGPALASNK         | ----FDGLW                   | IYFLGPVMGTL                            | SGAWTYTFIR                 |         |     |     |
| <i>Bpe</i> NIP1;1 | LVLEILCSFLLMFVISGVT         | TDRAISE-----VAGIAVG                                          | MTILLNVFIAGPVSGAS                                  | MNPARSIRPAVIKHV---YKGLW     | VYIVGP                      | IIIGTIAGAFAYN                          | LIR                        |         |     |     |
| <i>Bpe</i> NIP1;2 | FALEFIITFYLMFVISG           | VATDNRAIGE-----LAGLAVG                                       | STILLNVMFAGPISGAS                                  | MNPARS                      | LGPAIVHNK---YESIW           | VYLVATTLGAIAGGMVYN                     | IIR                        |         |     |     |
| <i>Bpe</i> NIP2;1 | LVMEIVVTF                   | TMMFTASAVATDTKAIGE-----LAGLAVG                               | SAVCITSILAGPISG                                    | SMNPARTIGPAIASAS---YKGIW    | VYLVGPV                     | TGTLGAWSYKLIR                          |                            |         |     |     |
| <i>Bpe</i> NIP4;1 | LIIEIIISFLLMFVICG           | VATDNRAIGE-----LAGIAVG                                       | MTITLNVFVAGPVSGAS                                  | MNPARSIGPALLTHM---YKGLW     | IYILG                       | PLAGTILGGFAYNMIR                       |                            |         |     |     |
| <i>Bpe</i> NIP5;1 | FALEFIITFNLLFVV             | TAVATDTRAVGE-----LAGIAVG                                     | ATVLVNILVAGPSSG                                    | SMNPVRTLGPAIAAGN---YKSLW    | IYLVAPT                     | LGALTGAGVYTAVK                         |                            |         |     |     |
| <i>Bpe</i> NIP5;2 | FALEFIVTFTLLFVIT            | AVATDCAVGE-----FAGIAIG                                       | GTVMNLIVAGTTTGAS                                   | MNPVRTIGPAIAAGT---YKGF      | WIYMVAPILGALAGAGTYTFVK      |                                        |                            |         |     |     |
| <i>Bpe</i> NIP6;1 | FALEFIISFNLMFVV             | TAVATDTRAVGE-----LAGIAVG                                     | ATVMNLIVAGPTTGAS                                   | MNPVRTLGPAVAANN---YKAIW     | VYLTAPILGALCGAGIYSAVK       |                                        |                            |         |     |     |
| <i>Bpe</i> NIP7;1 | FWVELIATFIIMFLAAS           | VTYQHQS                                                      | VGH-----LSGFVVGIAISL                               | -----AVPVSGG                | SMNPARS                     | LGPAIISGK---FNDIWIYMTAPTIGAVAGALLFRILR |                            |         |     |     |

## CO<sub>2</sub> Transporters

### PIP1

|          | 10                                        | 20                             | 30                              | 40                  | 50  | 60  | 70  | 80  | 90  | 100 |
|----------|-------------------------------------------|--------------------------------|---------------------------------|---------------------|-----|-----|-----|-----|-----|-----|
| AtPIP12  | -MEGKEEDVRVGANKFPERQPIGTSAQSD---          | KDYKEPPPAPLFEPGELASWSFWRAGIAEF | IATFLFLYITVLTVMGVKRSPNM-----    | CASVGIQ             |     |     |     |     |     |     |
| NtAQP1   | MAENKEEDVKLGANKFRETQPLGTAAQTD---          | KDYKEPPPAPLFEPGELSSWSFYRAGIAEF | MATFLFLYITILTVMGLKRSDSL-----    | CSSVGIQ             |     |     |     |     |     |     |
| BpePIP11 | -MEGKDEDVRLGANRYRERQPIGTAAQSQDT-          | KDYQEPPAAPFFEPGELSSWSFYRAGIAEF | VATFLFLYITVLTVMGVSKSPSK-----    | CSTVGIQ             |     |     |     |     |     |     |
| BpePIP13 | -MEGKEEDVRLGANKFPERQPIGTAAQSQDEG          | KDYIEPPPAPLFEPSELTSWSFYRAGIAEF | VATFLFLYITVLTVMGVAKSPSK-----    | CSTVGIQ             |     |     |     |     |     |     |
| BpePIP12 | -MEGKEEDVRLGANKYTERQPLGTAAQTD---          | KDYKEPPPAPLFEPGELCSWSFYRAGIAEF | VATFLFLYITVLTVMGVKRSSSV-----    | CASVGIQ             |     |     |     |     |     |     |
| BpePIP14 | -MEGKEEDVKVGASKFPERQAIGTSAQTD---          | KDYKEPPPAPLFEPGELQWSFWRAGIAEF  | IATFLFLYITLLTVMGVSRAPSK-----    | CASVGVQ             |     |     |     |     |     |     |
| HvPIP2_1 | -----MAKDIEAAPQGGEFSSKDYS                 | SDPPPAPIVDFEELTKWSLYRAVIAEF    | VATLLFLYITVATVIGYKHQSDPTVNTT    | DAACSGVGTL          |     |     |     |     |     |     |
| BpePIP21 | -----MSKEVSEEGQSHQ-HGKDYVD                | PPAPLLDLAELKLWSFYRSLIAEF       | IATLLFLYITVATVIGHKKATGP-----    | CDGVGLL             |     |     |     |     |     |     |
| BpePIP22 | -----MSKEVTEEREASQ-PVKDYVD                | PPATPLFDVAEFTMWSFYRAVIAEF      | AALLFLYITVATVIGYKKQTD-----      | CETVGLL             |     |     |     |     |     |     |
| BpePIP23 | -----MSKEVTEEAASQ-PVRDYVD                 | PPAPLFDVEELTEWSFYRAVIAEF       | IATLLFLYITVATVIGYKKQNDQ-----    | CETVGLL             |     |     |     |     |     |     |
| BpePIP24 | -----MAKDAEVPEH-GSFTAKDYH                 | DPAPLFDVELTKWSFYRALIAEF        | IATLLFLYITVLTVIGYKSQIDPANDGEA-- | CGGVGVL             |     |     |     |     |     |     |
| BpePIP25 | -----MAKDVEVAEHQGEYS                      | AKDYHDPAPLIDYDELIKWSFYRALIAEF  | IATLLFLYITVLTVIGYKSQTDPSKNPDQ-- | CGGVGIL             |     |     |     |     |     |     |
| BpePIP26 | -----MAKDMEVGGQSG-FSAKDYH                 | DPAPLIDAEELTKWSFYRAIIAEF       | IATLLFLYITVLTVIGYRAQSDTTRGGDD-- | CGGVGIL             |     |     |     |     |     |     |
|          | 110                                       | 120                            | 130                             | 140                 | 150 | 160 | 170 | 180 | 190 | 200 |
| AtPIP12  | GIAWAFGGMIFALVYCTAGISGGHINPAVTFGLFLARKLSL | TRAVYYIVMQCLGAICGAGVVKG        | FQPKQYQALGGGANTIAHGYTKG         | SGLGAEIIGTFVL       |     |     |     |     |     |     |
| NtAQP1   | GVAWAFGGMIFALVYCTAGISGGHINPAVTFGLFLARKLSL | TRAFYIVMQCLGAICGAGVVKG         | FQKQYERLGGGANTISSGYSKGD         | GLGAEIIGTFVL        |     |     |     |     |     |     |
| BpePIP11 | GIAWAFGGMIFALVYCTAGISGGHINPAVTFGLFLARKLSL | TRAFYIVMQCLGAICGAGVVKG         | FQKNQYERLGGGANTISSGYSKGD        | GLGAEIVGTFVL        |     |     |     |     |     |     |
| BpePIP13 | GIAWAFGGMIFALVYCTAGISGGHINPAVTFGLFLARKLSL | TRAFYIVMQCLGAICGAGVVKG         | FQKSQYERLGGGANFVNP              | PGYTKGDGLGAEIVGTFVL |     |     |     |     |     |     |
| BpePIP12 | GIAWAFGGMIFALVYCTAGISGGHINPAVTFGLFLARKLSL | TRAFYIIMQCLGAICGAGVVKG         | FQKTPFEINGGANVNVNHGYTKGD        | GLGAEIVGTFVL        |     |     |     |     |     |     |
| BpePIP14 | GIAWAFGGMIFALVYCTAGISGGHINPAVTFGLFLARKLSL | TRAFYIVMQCLGAICGAGVVKG         | FQKTQYERVGGGANVNVNHGYSKGD       | GLGAEIVGTFVL        |     |     |     |     |     |     |
| HvPIP2_1 | GIAWAFGGMIFVLVYCTAGVSGGHINPAVTFGLFLARKVSL | LIRALLYIIAQCLGACGVGLVK         | GFQSSYYVRYGGGANELSAGYSKGT       | GLAAEIIIGTFVL       |     |     |     |     |     |     |
| BpePIP21 | GIAWAFGGMIFVLVYCTAGISGGHINPAVTFGLFLARKVSL | LIRAVSYMVAQCLGAICGVGLVK        | AFMKHDYNMQGGGANSVSP             | PGYSTGTALGAEIIGTFVL |     |     |     |     |     |     |
| BpePIP22 | GVAWAFGGMIFVLVYSTAGISGGHINPAVTFGLFLARKVSL | LIRACYMVAQCLGAICGAGLVK         | GIMKDSYDAFGGGTNTVSP             | TYSKGTALGAEIIGTFVL  |     |     |     |     |     |     |
| BpePIP23 | GVAWAFGGMIFILVYSTAGISGGHINPAVTFGLFLARKVSL | LIRACYMVAQCLGAICGAGLVK         | GIMKDYYDALGGGTNTVSP             | TYNKGTALGAEIIGTFVL  |     |     |     |     |     |     |
| BpePIP24 | GIAWAFGGMIFVLVYCTAGISGGHINPAVTFGLFLARKVSL | VRASYMVAQCLGAISGVGLVK          | AFNKAHYTRYGGGANTLADGYST         | GVGLGAEIIGTFVL      |     |     |     |     |     |     |
| BpePIP25 | GIAWAFGGMIFVLVYCTAGISGGHINPAVTFGLFLARKVSL | LIRALLYMVAQCLGAICGVGLVK        | AFQKSDYNRYGGGANELSVGYNK         | GVGLGAEIIGTFVL      |     |     |     |     |     |     |
| BpePIP26 | GIALAFGGMIFVLVYCTAGISGGHINPAVTFGLFLARKVSL | VRALLYMVAQCLGAICGGLVK          | AFQRAHYTRYGGGANELSVGYSKGT       | GLAAEIIIGTFVL       |     |     |     |     |     |     |

210 220 230 240 250 260 270 280 290 300 310 320

AtPIP12 VYTVFSATDAKRNARDSHVPIILAPLPIGFAVFLVHLATIPITGTGINPARSLGAAIIFNKD~~NAWDDHW~~VFWVGPFIGAALAALYHVIVIRAIPFKSRS--

NtAQP1 VYTVFSATDAKRNARDSYVPIILAPLPIGFAVFLVHLATIPITGTGINPARSLGAAI~~IYNTDQAWDDHW~~IFWVGPFIGAALAAYVHQIIIRAIPFHKSS--

BpePIP11 VYTVFSATDAKRNARDSHVPIILAPLPIGFAVFLVHLATIPITGTGINPARSLGAALIFNKEQ~~AWHNH~~IFWVGPFIGAALAALYHQIVIRAIPFKSK---

BpePIP13 VYTVFSATDAKRSARDSHVPIILAPLPIGFAVFLVHLATIPITGTGINPARSLGAAI~~IYNRDRAWDDHW~~IFWVGPFIGAALAALYHQVVIRAIPFKSK---

BpePIP12 VYTVFSATDAKRNARDSHVPIILAPLPIGFAVFLVHLATIPITGTGINPARSLGAAI~~IYNKDHAWDDHW~~IFWVGPFIGAALAAYVHQIVIRAIPFKARG--

BpePIP14 VYTVFSATDAKRNARDSHVPLLAPLPIGFAVFLVHLATIPITGTGINPARSLGAAI~~IYNKDHAWDDQW~~IFWVGPFIGAALAALYHQIVIRAMPFKTRA--

HvPIP2\_1 VYTVFSATDPKRNARDSHIPVLAPLPIGFAVFMVHLATIPITGTGINPARSLGA~~AVIYNTDKAWDDQW~~IFWVGPLIGAAIAAAYHQYVLRASAAK-LGSY //

BpePIP21 VYTVFSATDPKRSARDSHVPLAPLPIGFAVFMVHLATIPITGTGINPARSLGA~~AVIYNNKGIWDDQW~~IFWVGPFV~~GAL~~AAAAHYHQYILRAAAIKALGSF //

BpePIP22 VYTVFTATDPKRNARDSYVPLAPLPIGFAVFMVHLATIPITGTGINPARSFG~~VAVIYNNDKVWDDQW~~IFWAGPFAGALAAALYYQFILRATAMKALGSF //

BpePIP23 VYTVFSATDPKRRKARDSHVPLAPLPIGFAVFMVHLATIPITGTGINPARSFG~~AAVIYNNDKVWDDQW~~IFWVGPFAGALAAALYHQHILRATAIKALGSF //

BpePIP24 VYTVFSATDPKRNARDSHVPLAPLPIGFAVFMVHLATIPITGTGINPARSFG~~AAIYNNKAKAWDDQW~~IFWVGPFAGALAAAFYHQFILRAGAIAKALGSF //

BpePIP25 VYTVFSATDPKRSARDSHVPLAPLPIGFAVFMVHLATIPITGTGINPARSFG~~AAVIYNNDKAWDDQW~~IFWVGPFIGAAIAAFYHQFILRAGAIAKALGSF //

BpePIP26 VYTVFSATDPKRSARDSHVPLAPLPIGFAVFMVHLATIPITGTGINPARSFG~~AAVMYKTKAWDDQW~~IFWVGPFIGAAIAAFYHQFILRAGAIAKALGSF //

## ***H<sub>2</sub>O<sub>2</sub> Transporters***

**PIP2**

110 120 130 140 150 160 170 180 190 200

*AtPIP2;1* WAFGGMIFILVYCTAGISGGHINPAVTFGLFLARKVSLPRALLYIIAQCLGAICGVGVFKAFQSSYYTRYGGGANSLADGYSTGTGLAAEIIIGTFVLVYT

*AtPIP2;4* WAFGGMIFVLVYCTAGISGGHINPAVTVGLFLARKVSLVRTVLYIVAQCLGAICGCGFVKAFQSSYYTRYGGGANELADGYNKGTGLGAEIIIGTFVLVYT

*AtNIP1;2* IVWGLTVMVLVYSLGHISGAHFNPAVTIAFASCGRFPLKQVPAYVISQVIGSTLAAATLRLFLGLDQDVCSGKHDVFVGTLPSGSNLQSFVIEFIIITFYL

*AtTIP1;1* VAHAFGLFVAVSVGANISGGHVNPAVTFGAFIGGNITLLRGILYWIAQLLGSVVAACLILKFATGGLAVPAFG----LSAGVGVNLNAFVFEIVMTFGLVYT

*AtTIP1;2* LAHAFGLFVAVSVGANISGGHVNPAVTFGVLLGGNITLLRGILYWIAQLLGSVAACFLLSFATGGEPPIPAFG----LSAGVGSNLNALVFEIVMTFGLVYT

*AtTIP2;3* IAHAFALFVGVSIAANISGGHLNPAVTLGLAIGGNITLITGFFYWIAQCLGSIVACLILLVFVTNGKSVPTHG----VSAGLGAVEGVVMEIVVTFALVYT

*BpePIP1;1* WAFGGMIFALVYCTAGISGGHINPAVTFGLFLARKLSLTRAIFYIVMQCLGAICGAGVVKGFQKNQYERLGGGANTISSGYSKGDGLGAEIVGTFVLVYT

*BpePIP1;2* WAFGGMIFALVYCTAGISGGHINPAVTFGLLLARKLSLTRAIFYIIMQCLGAICGAGVVKGFQKTPFEINGGGANVNVNHGYTKGDGLGAEIVGTFVLVYT

*BpePIP1;3* WAFGGMIFALVYCTAGISGGHINPAVTFGLFLARKLSLTRALFYIVMQCLGAICGAGVVKGFQKSQYEILGGGANFVNPNGYTKGDGLGAEIVGTFVLVYT

*BpePIP1;4* WAFGGMIFALVYCTAGISGGHINPAVTFGLFLARKLSLTRALFYIVMQCLGAICGAGVVKGFQKTQYERVGGGANVNVNHGYSKGDGLGAEIVGTFVLVYT

*BpePIP2;1* WAFGGMIFVLVYCTAGISGGHINPAVTFGLFLARKVSLIRAVSYMVAQCLGAICGVGLVKAFMKHDYNDMQGGGANVSPPGYSTGTALGAEIIIGTFVLVYT

*BpePIP2;2* WAFGGMIFVLVYSTAGISGGHINPAVTFGLFLARKVSLIRAI CYMVAQCLGAICGAGLVKGIKMDYSYDALGGGTNTVSPSTYSGKTALGAEIIIGTFVLVYT

*BpePIP2;3* WAFGGMIFILVYSTAGISGGHINPAVTFGLFLARKVSLIRAI CYMVAQCLGAICGAGLVKGIKMDYYDALGGGTNTVSPSTYNGKTALGAEIIIGTFVLVYT

*BpePIP2;4* WAFGGMIFVLVYCTAGISGGHINPAVTFGLFLARKVSLVRAVSYMVAQCLGAISGVGLVKAFNKAHYTRYGGGANTLADGYSTGVGLGAEIIIGTFVLVYT



**BpePIP2;5**  
**BpePIP2;6**

WAFGGMIFVLVYCTAGISGGHINPAVTFGLFLARKVSLIRALLYMVAQCLGAICGVGLVKAFQKSDYNRYGGGANELSVGYNKGVGLGAEIIGTFVLVYT  
LAFGGMIFVLVYCTAGISGGHINPAVTFGLFLARKVSLVRAILYMVAQCLGAICGCGLVKAFQRAHYTRYGGGANELSVGYSKGTGLAAEIIIGTFVLVYT

|                  | 210                      | 220                                      | 230               | 240               | 250            | 260                 | 270                | 280 | 290        | 300 |
|------------------|--------------------------|------------------------------------------|-------------------|-------------------|----------------|---------------------|--------------------|-----|------------|-----|
| <b>AtPIP2;1</b>  | VFSATDPKRSARDSHVPVLAPLP  | IGFAVFMVHLATIPITGTGINPARSFGAAVIYNKSKPWDD | HWIFWVGPF         | FIGAAIAAFYHQFVLRA | ----           | SGSKSLGS            |                    |     |            |     |
| <b>AtPIP2;4</b>  | VFSATDPKRNARDSHVPVLAPLP  | IGFAVFMVHLATIPITGTGINPARSFGAAVIYNNEKAWDD | QWIFWVGPM         | IGAAAAAFYHQFILRA  | ----           | AAIKALGS            |                    |     |            |     |
| <b>AtNIP1;2</b>  | MFVISGVATDNRA--IGELAGLAV | GSTVLLNVIIAGPVSGASMNPG                   | RSILGPAMVYS       | ----              | CYRGLWIIYIVSP  | IVGAVSGAWVYNMVR     | YTDKPLREITKSGS     |     |            |     |
| <b>AtNIP1;1</b>  | VYATA---IDPKNGSLGTIAPIA  | IGFIVGANILAGGAFSGASMNPA                  | VAFGPAVVS         | ----              | TWTNHWVYIWAGPL | VGGGIAGLIYEVFFIN    | -TTHEQLPTTDY       |     |            |     |
| <b>AtTIP1;2</b>  | VYATA---VDPKNGSLGTIAPIA  | IGFIVGANILAGGAFSGASMNPA                  | VAFGPAVVS         | ----              | TWTNHWVYIWAGPL | VGGGIAGLIYDFVFIDENA | HEQLPTTDY          |     |            |     |
| <b>AtTIP2;3</b>  | VYATA---ADPKKGS          | LTGIIAPIAIGFIVGANILAAGPF                 | SGGSMNPARSFGPAVVS | SG                | ----           | DLSQIWIYIWVG        | PLVGGALAGLIYGDVFIG | --- | SYEAVETREI |     |
| <b>BpePIP1;1</b> | VFSATDAKRNARDSHVPILAPLP  | IGFAVFLVHLATIPITGTGINPARSLGAALIFNKEQ     | AWHNHWIFWVGPF     | FIGAALAALYHQIVIRA | ----           | IPFKSK--            |                    |     |            |     |
| <b>BpePIP1;2</b> | VFSATDAKRNARDSHVPILAPLP  | IGFAVFLVHLATIPITGTGINPARSLGAALIIYNKD     | HAWDDHWIFWVGPF    | FIGAALAAYVHQIVIRA | ----           | IPFKARG-            |                    |     |            |     |
| <b>BpePIP1;3</b> | VFSATDAKRSARDSHVPILAPLP  | IGFAVFLVHLATIPITGTGINPARSLGAALIIYNR      | DRAWDDHWIFWVGPF   | FIGAALAALYHQVVIRA | ----           | IPFKSK--            |                    |     |            |     |
| <b>BpePIP1;4</b> | VFSATDAKRNARDSHVPILLAPLP | IGFAVFLVHLATIPITGTGINPARSLGAALIIYNKD     | HAWDDQWIFWVGPF    | FIGAALAALYHQIVIRA | ----           | MPFKTRA-            |                    |     |            |     |
| <b>BpePIP2;1</b> | VFSATDPKRSARDSHVPVLAPLP  | IGFAVFMVHLATIPITGTGINPARSLGAAVIYNNG      | KIWDDQWIFWVGPF    | VGALAAAAYHQYILRA  | ----           | AAIKALGS            |                    |     |            |     |
| <b>BpePIP2;2</b> | VFTATDPKRNARDSYVPVLAPLP  | IGFAVFMVHLATIPITGTGINPARSFGVAVIYNND      | KVWDDQWIFWAGPF    | FAGALAAALYYQFILRA | ----           | TAMKALGS            |                    |     |            |     |
| <b>BpePIP2;3</b> | VFSATDPKRKARDSHVPVLAPLP  | IGFAVFMVHLATIPITGTGINPARSFGAAVIYNND      | KVWDDQWIFWVGPF    | FAGALAAALYHQHILRA | ----           | TAIKALGS            |                    |     |            |     |
| <b>BpePIP2;4</b> | VFSATDPKRNARDSHVPVLAPLP  | IGFAVFMVHLATIPITGTGINPARSLGAALIIYNK      | AKAWDDQWIFWVGPF   | FIGAAIAAFYHQFILRA | ----           | GAAKALGS            |                    |     |            |     |
| <b>BpePIP2;5</b> | VFSATDPKRSARDSHVPVLAPLP  | IGFAVFMVHLATIPITGTGINPARSFGAAVIYNK       | DKAWDDQWIFWVGPF   | FIGAAIAAFYHQFILRA | ----           | GAIKALGS            |                    |     |            |     |
| <b>BpePIP2;6</b> | VFSATDPKRSARDSHVPVLAPLP  | IGFAVFMVHLATIPITGTGINPARSFGAAVMYK        | TKAWDDQWIFWVGPF   | FIGAAIAAFYHQFILRA | ----           | GAAKALGS            |                    |     |            |     |

**TIP & XIP**

|                   | 110                                      | 120                    | 130           | 140            | 150            | 160        | 170          | 180  | 190 | 200 |
|-------------------|------------------------------------------|------------------------|---------------|----------------|----------------|------------|--------------|------|-----|-----|
| <b>AtTIP1;2</b>   | AHAFGLFVAVSVGANISGGHVNPAVTFGVLLGGNITLLRG | IYWIAQLLGS             | VAAACFLLSF    | ATGGEP         | IPAFGLSAGVGS   | LN         | -----        | ALVF |     |     |
| <b>AtTIP2;3</b>   | AHAFALFVGVSIAANISGGHLNPAVTLGLAIGGNITLITG | FFYWIAQCLGS            | IVACLLLVF     | VTNGKSVPT      | HGVSAGLGAVE    | -----      | GVVM         |      |     |     |
| <b>AtPIP2;1</b>   | AFGGMIFILVYCTAGISGGHINPAVTFGLFLARKVSLPR  | ALLYIIAQCLGAICGVGFVKAF | QSSYYTRYGGGAN | SLADGYSTGT     | -----          | GLAA       |              |      |     |     |
| <b>AtPIP2;4</b>   | AFGGMIFVLVYCTAGISGGHINPAVTVGLFLARKVSLVR  | TVLYIVAQCLGAICGCGFVKAF | QSSYYTRYGGGAN | ELADGYNKGT     | -----          | GLGA       |              |      |     |     |
| <b>AtNIP1;2</b>   | VWGLTVMVLVYSLGHISGAHFNPAVTIAFASCGRFPLK   | QVPAYVISQVIGSTLAAATLRL | LFGLDQDVC     | SGKHDVFGTLP    | SGSN           | -----      | LQSFVI       |      |     |     |
| <b>BpeTIP1;1</b>  | AHAFGLFVAVSISANISGGHVNPAVTFGAFIGGNITLLR  | GIVYWIAQLLGSTVACLL     | LKFATNGLT     | TSAFSLSSGVGVWN | -----          | AFVL       |              |      |     |     |
| <b>BpeTIP1;2</b>  | AHGFLFVAVSIGANISGGHVNPAVTFGAFLGGHISLIR   | GLLYWVAQLLGSV          | VACLLLFSTGG   | LET            | PAFSLSSDVSVWN  | -----      | AVVL         |      |     |     |
| <b>BpeTIP1;3</b>  | AHAFALFVAVSVGANISGGHVNPAVTFGAFIGGNITLLR  | TILYWIAQLLGSV          | VACLLLFATGG   | LET            | SAFSLSSGVSVWN  | -----      | AVVF         |      |     |     |
| <b>BpeTIP2;1</b>  | CHGFALFVAVAVGANISGGHVNPAVTFGLALGGQITLL   | TGIFYWIAQLLGS          | IAACFLLKAVT   | -GLAIP         | THSVASGVGAIE   | -----      | GVVM         |      |     |     |
| <b>BpeTIP2;2</b>  | AHAFALFVGVSIAANISGGHLNPAVTFGLALGGNITIL   | TGIFYWIAQCLGS          | IVACLLLQFV    | TNGLSIP        | THGVASGMNAVE   | -----      | GVVM         |      |     |     |
| <b>BpeTIP3;1</b>  | AHAFSLFAAVAASLNISGGHVNPAVTFGTLGGRI       | SVLRAVFWIAQLLGAV       | VASLLRLVT     | TNNMRP         | VGFFYVTS       | SGVGEWH    | -----        | GLIF |     |     |
| <b>BpeTIP4;1</b>  | THALVVAVMISAG-HISGGHLNPAVTLGLLAGGHITIF   | RSFLYWIDQLLAASAAC      | IIILYYITGGL   | TTPIH          | SLASGVGYLQ     | -----      | GVIW         |      |     |     |
| <b>BpeTIP5;1</b>  | TNAFALSAAVYVAANISGGHVNPAVTFGMVGGHISV     | PALFYWLSQMLASV         | MSLLKMT       | VVGQHV         | PTYVIAEEMT     | GFG        | -----        | ASLM |     |     |
| <b>BpeXIP2;1*</b> | LIAIITAILLLAANPISGGHMNPVITLAAALVG        | VISVSRAAVYILAQCAGAV    | LALKA         | VNSTIED        | TFSLGGCTLT     | VIAPGPNGPI | SVGLGTSQGLWL |      |     |     |
| <b>BpeXIP1;1</b>  | AVFIIAFLFLATIPLSGGHMNPILTFIACLKGLIT      | LARASIYVLAQCLGS        | IIIGFFIIKNV   | MNHQTGHNY      | FLGGCTISALNRGT | -----      | ALVL         |      |     |     |

|                   |                                                                                                      |
|-------------------|------------------------------------------------------------------------------------------------------|
| <b>BpeXIP1;2</b>  | AVFIIAFLFLMATAPLSGGHMSPIFTTFIACLKGLITLARASIYVLAQCLGSIIGFFIIKNVMNHQIGHKYFLGGCTISALSRGT-----ALVL       |
| <b>BpeXIP1;3</b>  | AVFIIAFLFLMATVPLSGGHMSPIFTTFIACLKGLITLARASMYVLAQCLGSIIGFFIIKNVMNHQTGHKYFLGGCTISTLSRGT-----ALVL       |
|                   | 210 220 230 240 250 260 270 280 290 300                                                              |
| <b>AtPIP2;4</b>   | EIIGTFVLVYTVFSATDPKRNARDSHVPVLAPL---PIGFAVFMVHLAT--IPITGTGINPARSFGAAVIYNNEKAWDDQWIFWVGPMIGAAAAAFYHQF |
| <b>AtTIP23</b>    | EIVVTFALVYTVYATAADPKKG-----SLGTIAPIAIGFIVGANILAAG--PFSGGSMNPARSFGPVAVSGD---LSQIWIYWVGPLVGGALAGLIYGD  |
| <b>AtNIP1;2</b>   | EFIITFYLMFVISGVATDNR-----AIGELAGLAVGSTVLLNVIIAG--PVSGASMNPGRSLGPAMVYSC---YRGLWIYIVSPIVGAVSGAWVYNM    |
| <b>AtTIP11</b>    | EIVMTFGLVYTVYATAIDPKNG-----SLGTIAPIAIGFIVGANILAGG--AFSGASMNPVAFGPVAVSWT---WTNHWVYWAGPLVGGGIAGLIYEV   |
| <b>AtTIP12</b>    | EIVMTFGLVYTVYATAVDPKNG-----SLGTIAPIAIGFIVGANILAGG--AFSGASMNPVAFGPVAVSWT---WTNHWVYWAGPLIGGGLAGLIYDF   |
| <b>BpeTIP1;1</b>  | EIVMTFGLVYTVYATAVDPKRG-----SVGVIAPIAIGFIVGANILAGG--AFDGASMNPVAVSFGPALVSWT---WENHWVYWAGPLIGGGLAGLVYEF |
| <b>BpeTIP1;2</b>  | EIVMTFGLVYTVYATAVDPKKG-----NIGILAPIAIGLIVGANILAGG--AFDGASMNPVAVSFGPAVVSWs---WDNHWVYWVGPLIGSAIAAIVYEL |
| <b>BpeTIP1;3</b>  | EIVMTFGLVYTVYATAVDPKKG-----NVGTVAPIAIGFIVGANILVGG--AFDGASMNPVAVSFGPAVVSWs---WTNHWVYWLGPVGAIAAIVYDT   |
| <b>BpeTIP2;1</b>  | EIIITFALVYTVYATAADPKKG-----SLGTIAPIAIGFIVGANILAAG--PFSGGSMNPARSFGPVAVSGD---FHDNWIYWAGPLVGGGLAGLIYGN  |
| <b>BpeTIP2;2</b>  | EIVITFALVYTVYATAADPKKG-----SLGIIAPIAIGFIVGANILAAG--PFSGGSMNPARSFGPVAVSGD---FSQNWIIYWVGPLIGGGLAGLVYGG |
| <b>BpeTIP3;1</b>  | EIVMTFTLVYTVFATAIDPKRG-----SLGTIAPLAIGFIVGANILAGG--PFDGACMNPVAFGPALVGWR---WRNHWIYWVGPLIGGGLAGLVYFY   |
| <b>BpeTIP4;1</b>  | EVILTFSLFTVYATIVDPKKG-----ALDGLGPTLTGFVVGANILAGG--AFSGASMNPVAVSFGPALISGD---WTDHWVYWVGPLIGGGLAGFIYEN  |
| <b>BpeTIP5;1</b>  | EGVLTFALVYTVYA-AGDTRRG-----TMGAIGPIAIGSIAGANVLAAG--PFSGGSMNPACAFGSAVTAGS---FKNQAVYWVGPLIGAAAAGLVYDN  |
| <b>BpeXIP2;1*</b> | EIICTFVLLFASIWIALDHRQARALGRVIFSVIGIVVGLLVFVSTTVTGAKGYAGAGMNPVAVSFGPALISGD---WNGHWVFWAGPSIASVAFYLYTKI |
| <b>BpeXIP1;1</b>  | EFCCTFVLLFVGVTVAFDKKRCKELGLAVVCAVVAAAWALAVFVSITVTGQVGYAGVGLNPARCLGPALLHGGVL-WDGHVWVFWGPFACIVYYGYSMS  |
| <b>BpeXIP1;2</b>  | EFCCTFVVLVVGVTVAFDKKRCKELGLAVVCVVVAGAMALAVFVSITVTGQASYAGVGLNPARCLGPVLLQGGVL-WDGHVWLWVGPFACIVYYGYSMN  |
| <b>BpeXIP1;3</b>  | EFCCTFVVLVVGVTVAFDKKRCKELGVAVVCVVVAGAMALAVFVSITVTGQAGYAGVGLNPARCLGPALLQGGVL-WDGHVWVFWGPFACIVYYGYSMN  |

## Silicic Acid Transporters

**NIP**

10 20 30 40 50 60 70 80 90 100

*HvNIP2;1* -MASNSRSNSRATFSSEIHDIGTVQNSTTPSMVYYTERSIA DYFP PHL LKKVVSEVVSTFLLVFVTCGAAAISAHDVTRISQLGQSVAGGLIVVMIYAV  
*ZmNIP2;1* -MSTNSRSNSRANFNNEIHDIGTAQNSSMPPT--YY-DRSLADIF P PHL LKKVVSEVVSTFLLVFVTCGAAGIYGSDKDRI SQLGQSVAGGLIVTVMYIYAV  
*OsNIP2;1* MASNNSRTNSRANYSNEI HDLSTVQNGTMPTM--YYGEKAIADFF P PHL LKKVVSEVVATFLLVFMT CGAAGISGSDLRSISQLGQSIAGGLIVTVMYIYAV  
***BpeNIP2;1*** -MATDPKPKNLAEANEVFSLENPI SRKPKPGLL--RALLEEHYP PGFLSKVVAETIATYLLVFVTCGSAALSAADENKVKSLAASVAGGLIVTVMYIYAV

110 120 130 140 150 160 170 180 190 200

*HvNIP2;1* GHISGAHMNP AVTLAFAIFRHFPWIQVPFYWAAQFTGAICASFVLKAVLHPITVIGTTPEVGP HWHALVIEVVVTFNMMFVTLAVATDTRAVGELAGLAV  
*ZmNIP2;1* GHISGAHMNP AVTLAFAVFRHFPWIQVPFYWAAQFTGSICASFVLKAVLHP IAVLGTTTPTGPHWHS LVIEIIVTFNMMFVTLAVATDTRAVGELAGLAV  
*OsNIP2;1* GHISGAHMNP AVTLAFAVFRHFPWIQVPFYWAAQFTGAICASFVLKAVIHPVDVIGTTTTPVGP HWHSLVVEVIVTFNMMFVTLAVATDTRAVGELAGLAV  
***BpeNIP2;1*** GHISGAHMNP AVTLAFAAVRHF PWKQVPLYAAAQLAGAISAAFTLRVILNPIKELGTTSP TGTEIEALVMEIVVTF TMFTASAVATDTKAIGELAGLAV

210 220 230 240 250 260 270 280 290 300

*HvNIP2;1* GSAVCITSIFAGAVSGGSMNPARTLGPALASNLYTGLWLWYFLGPVLGTL SGAWTYTYIRFEDPP--KDAPQKLSSF KLRRLQSQ-SVAADD-DELDHIPV  
*ZmNIP2;1* GSAVCITSIFAGAVSGGSMNPARTLGPALASNLYTGLWYIYFLGPVLGTL SGAWTYTYIRFEEAPSHKDMSQKLSSF KLRRLQSQ-SVAVDD-DELDHIQV  
*OsNIP2;1* GSAVCITSIFAGAISSGSMNPARTLGPALASNKFDGLWYIYFLGPVMGTL SGAWTYTFIRFEDTPK-EGSSQKLSSF KLRRLRSQQSIAADDVDEMENIQV  
***BpeNIP2;1*** GSAVCITSILAGPISGGSMNPARTIGPAIASASYKGIWVYLVGPVVTGTL LGAWSYKLIRVSD EPLYPMSKEGHSKEMVNKYPNN-SV-----

## PIP1 & PIP2

|                  | 110                                                                                                  | 120 | 130 | 140 | 150 | 160 | 170 | 180 | 190 | 200 |
|------------------|------------------------------------------------------------------------------------------------------|-----|-----|-----|-----|-----|-----|-----|-----|-----|
| <i>NtAQP1</i>    | TVMGLKRSDSL-----CSSVGIQGVAWAFGGMIFALVYCTAGISGGHINPAVTFGLFLARKLSLTRAIFYIVMQCLGAICGAGVVKGMVGPYQRLGGG   |     |     |     |     |     |     |     |     |     |
| <i>NtTIPa</i>    | SAMAANKLNGD-----AMAHALVVAVTISAGFRISGGHINPAVTLGLCMGGHITVFRSILYWIDQLLASVAACALLNYLTAG----LETP           |     |     |     |     |     |     |     |     |     |
| <i>AtTIP4;1</i>  | SAMATDSLNG-----TLVGLFAVAVAHAFVAVMISAG-HISGGHINPAVTLGLLLGGHISVFRFLYWIDQLLASSAACFLLSYLTGG----MGTP      |     |     |     |     |     |     |     |     |     |
| <i>CpNIP1</i>    | AAALNGSDAQR-----VSQLGASVAGGLIVTVMIIYAVGHISGAHMNPAVTTAFATRHFPWKQVPLYAAAQLSGATCAAFTRLRLLLHPIKHLGT--    |     |     |     |     |     |     |     |     |     |
| <i>AtNIP6;1</i>  | TAIVNQKTDGA-----ETLIGCAASAGLAVMIVILSTGHISGAHLNPAVTIAFAALKHFPWKHVPVYIGAQVMASVSAAFALKAVFEPTMSGGV--     |     |     |     |     |     |     |     |     |     |
| <i>AtNIP2;1</i>  | AIAVNAQHNHV-----VTLVGIAVVWGIVIMVLVYCLGHLA-AHFNPVATLALASSQRFPLNQVPAYITVQVIGSTLASATLRLLLFDLNDVCSKK     |     |     |     |     |     |     |     |     |     |
| <i>BpePIP1;2</i> | TVMGVKRSSSV-----CASVGIQGIAWAFGGMIFALVYCTAGISGGHINPAVTFGLLLARKLSLTRAIFYIIMQCLGAICGAGVVKGFQKTPFEINVG   |     |     |     |     |     |     |     |     |     |
| <i>BpePIP1;4</i> | TVMGVSRAPSK-----CASVGVQGIAWAFGGMIFALVYCTAGISGGHINPAVTFGLFLARKLSLTRAIFYIIMQCLGAICGAGVVKGFQKTQYERVGG   |     |     |     |     |     |     |     |     |     |
| <i>BpePIP1;1</i> | TVMGVSKSPSK-----CSTVGIQGIAWAFGGMIFALVYCTAGISGGHINPAVTFGLFLARKLSLTRAIFYIIMQCLGAICGAGVVKGFQKNQYERLGG   |     |     |     |     |     |     |     |     |     |
| <i>BpePIP1;3</i> | TVMGVAKSPSK-----CSTVGIQGIAWAFGGMIFALVYCTAGISGGHINPAVTFGLFLARKLSLTRAIFYIIMQCLGAICGAGVVKGFQKSQYEILGG   |     |     |     |     |     |     |     |     |     |
| <i>BpePIP2;1</i> | TVIGHKKATGP-----CDGVGLLGIAWAFGGMIFVLVYCTAGISGGHINPAVTFGLFLARKVSLIRAVSYMVAQCLGAICGVGLVKAFMKHDYNNQGGG  |     |     |     |     |     |     |     |     |     |
| <i>BpePIP2;2</i> | TVIGYKKQTDQ-----CETVGLLGVAWAFGGMIFVLVYSTAGISGGHINPAVTFGLFLARKVSLIRAICYMVAQCLGAICGAGLVKGIMKDSYDAFGG   |     |     |     |     |     |     |     |     |     |
| <i>BpePIP2;3</i> | TVIGYKKQNDQ-----CETVGLLGVAWAFGGMIFVLVYSTAGISGGHINPAVTFGLFLARKVSLIRAICYMVAQCLGAICGAGLVKGIMKDYYDALGG   |     |     |     |     |     |     |     |     |     |
| <i>BpePIP2;4</i> | TVIGYKSQIDPANDGEACGGVGLGIAWAFGGMIFVLVYCTAGISGGHINPAVTFGLFLARKVSLVRAVSYMVAQCLGAISGVGLVKAFNKAHYTRYGGG  |     |     |     |     |     |     |     |     |     |
| <i>BpePIP2;5</i> | TVIGYKSQTDPSKNPDQCGGVGILGIAWAFGGMIFVLVYCTAGISGGHINPAVTFGLFLARKVSLIRALLYMVAQCLGAICGVGLVKAFQKSDYNRYGGG |     |     |     |     |     |     |     |     |     |
| <i>BpePIP2;6</i> | TVIGYRAQSDTTRGGDDCGGVGILGIALAFGGMIFVLVYCTAGISGGHINPAVTFGLFLARKVSLVRAILYMVAQCLGAICGGLVKAFQRAHYTRYGGG  |     |     |     |     |     |     |     |     |     |

  

|                  | 210                                                                                                    | 220 | 230 | 240 | 250 | 260 | 270 | 280 | 290 | 300 |
|------------------|--------------------------------------------------------------------------------------------------------|-----|-----|-----|-----|-----|-----|-----|-----|-----|
| <i>NtAQP1</i>    | ANV---VNHGYTKGDGLGAEIIGTFVLVYTVFSA-TDAKRNARDSYVPILAPLPIGFAVFLVHLATIPITGTGINPARSLGAALIIYNTDQAWDDHWIFWV  |     |     |     |     |     |     |     |     |     |
| <i>NtTIPa</i>    | VHT---LANGVSYQGQIIMEVILTFSLFTVYTTIVDPKKGILEGMGPLLTGLVVGANI-----MAGGPFSGASMPARSFPGPAFVSGI---WTDHWVYVW   |     |     |     |     |     |     |     |     |     |
| <i>AtTIP4;1</i>  | VHT---LASGSYTYQGIWEIILTFSLFTVYATIVDPKKGSLDGFGPLLTGFVVGANI-----LAGGAFSGASMPARSFPGPALVSGN---WTDHWVYVW    |     |     |     |     |     |     |     |     |     |
| <i>CpNIP1</i>    | -----TPPSGSDLQALVMEIVVTFSMMFVTCAVATDTKA-----VGELAGLAVGSAVCITSILAGPVSGGSMNPVRTLGPAASDN---YKGLWVYFV      |     |     |     |     |     |     |     |     |     |
| <i>AtNIP6;1</i>  | -----TVPTVGLSQAFALEFIISFNLMFVVTAVATDTRA-----VGELAGIAGVATVMLNLIAGPATASAMNPVRTLGPAIAANN---YRAIWVYLT      |     |     |     |     |     |     |     |     |     |
| <i>AtNIP2;1</i>  | HDVFLGSSPSGSDLQAFVMEFIITGFLMLVCAVTTTKRT-----TEELEGLIIGATVTLNVIFAGEVSGASMPARSIGPALVWGC---YKGIWIYLL      |     |     |     |     |     |     |     |     |     |
| <i>BpePIP1;2</i> | ANV---VNHGYTKGDGLGAEIVGTFVLVYTVFSA-TDAKRNARDSHVPILAPLPIGFAVFLVHLATIPITGTGINPARSLGAALIIYNKDHAWDHWIFWV   |     |     |     |     |     |     |     |     |     |
| <i>BpePIP1;4</i> | ANV---VNHGYSKGDGLGAEIVGTFVLVYTVFSA-TDAKRNARDSHVPVLLAPLPIGFAVFLVHLATIPITGTGINPARSLGAALIIYNKDHAWDQWIFWV  |     |     |     |     |     |     |     |     |     |
| <i>BpePIP1;1</i> | ANT---ISSGYSKGDGLGAEIVGTFVLVYTVFSA-TDAKRNARDSHVPILAPLPIGFAVFLVHLATIPITGTGINPARSLGAALIFNKEQAWHNNHWIFWV  |     |     |     |     |     |     |     |     |     |
| <i>BpePIP1;3</i> | ANF---VNPGYTKGDGLGAEIVGTFVLVYTVFSA-TDAKRSARDSHVPILAPLPIGFAVFLVHLATIPITGTGINPARSLGAALIIYNRDRWDHWIFWV    |     |     |     |     |     |     |     |     |     |
| <i>BpePIP2;1</i> | ANS---VSPGYSTGTALGAEIIGTFVLVYTVFTA-TDPKRSARDSHVPVLAAPLPIGFAVFMVHLATIPITGTGINPARSLGAALIIYNNKQWDDQWIFWV  |     |     |     |     |     |     |     |     |     |
| <i>BpePIP2;2</i> | TNT---VSPTYSGKTALGAEIIGTFVLVYTVFTA-TDPKRNARDSYVPVLAAPLPIGFAVFMVHLATIPITGTGINPARSFGVAVIYNNDKVWDDQWIFWA  |     |     |     |     |     |     |     |     |     |
| <i>BpePIP2;3</i> | TNT---VSPTYNGKTALGAEIIGTFVLVYTVFSA-TDPKRNARDSHVPVLAAPLPIGFAVFMVHLATIPITGTGINPARSFGAAVIYNNDKVWDDQWIFWV  |     |     |     |     |     |     |     |     |     |
| <i>BpePIP2;4</i> | ANT---LADGYSTGVGLGAEIIGTFVLVYTVFSA-TDPKRNARDSHVPVLAAPLPIGFAVFMVHLATIPITGTGINPARSLGAALIIYNKAKWDDQWLFVW  |     |     |     |     |     |     |     |     |     |
| <i>BpePIP2;5</i> | ANE---LSVGYNKGVLGAEIIGTFVLVYTVFSA-TDPKRSARDSHVPVLAAPLPIGFAVFMVHLATIPITGTGINPARSFGAAVIYNNDKWDDQWIFWV    |     |     |     |     |     |     |     |     |     |
| <i>BpePIP2;6</i> | ANE---LSVGYSKGTGLAAEIIIGTFVLVYTVFSA-TDPKRSARDSHVPVLAAPLPIGFAVFMVHLATIPITGTGINPARSFGAAVMYGKTKAWDDQWIFWV |     |     |     |     |     |     |     |     |     |

**TIP & XIP**

|                  | 110                | 120           | 130       | 140     | 150     | 160    | 170    | 180    | 190        | 200      |              |             |     |      |      |       |    |    |     |     |         |      |      |      |     |        |     |     |    |           |     |            |     |      |        |        |        |     |       |   |   |     |     |         |     |   |   |   |   |     |      |     |      |   |   |      |      |      |        |         |   |   |   |   |   |   |    |   |   |        |   |        |        |   |        |        |        |   |   |   |   |   |   |   |   |        |
|------------------|--------------------|---------------|-----------|---------|---------|--------|--------|--------|------------|----------|--------------|-------------|-----|------|------|-------|----|----|-----|-----|---------|------|------|------|-----|--------|-----|-----|----|-----------|-----|------------|-----|------|--------|--------|--------|-----|-------|---|---|-----|-----|---------|-----|---|---|---|---|-----|------|-----|------|---|---|------|------|------|--------|---------|---|---|---|---|---|---|----|---|---|--------|---|--------|--------|---|--------|--------|--------|---|---|---|---|---|---|---|---|--------|
| <i>CpNIP1</i>    | AAALNGSDAQRVS----- | QLGASVAGGLIVT | VMIYAVGHI | SGAHMNP | PAVTTAF | AATRHF | PWKQV  | PLYAAA | QLSGATCAAF | TLRLLLHP | IKHLGT-----  |             |     |      |      |       |    |    |     |     |         |      |      |      |     |        |     |     |    |           |     |            |     |      |        |        |        |     |       |   |   |     |     |         |     |   |   |   |   |     |      |     |      |   |   |      |      |      |        |         |   |   |   |   |   |   |    |   |   |        |   |        |        |   |        |        |        |   |   |   |   |   |   |   |   |        |
| <i>AtNIP6;1</i>  | TAIVNQKTDGAET----- | LIGCAASAGL    | VMIVILST  | GHI     | SGAHLNP | PAVTIA | FALKH  | FPWKH  | VPVYIGA    | QVMASV   | SAAFALKAVFEP | TMSSGV----- |     |      |      |       |    |    |     |     |         |      |      |      |     |        |     |     |    |           |     |            |     |      |        |        |        |     |       |   |   |     |     |         |     |   |   |   |   |     |      |     |      |   |   |      |      |      |        |         |   |   |   |   |   |   |    |   |   |        |   |        |        |   |        |        |        |   |   |   |   |   |   |   |   |        |
| <i>AtNIP2;1</i>  | AIAVNAQHNHVVT----- | LVGI          | AVVWGIV   | IMVLV   | YCLGHL  | S-AHFN | PAVT   | LALASS | QRFPL      | NQVPAYIT | VQVIGSTLAS   | ATLRL       | FDL | NND  | VCSK | KHDVF |    |    |     |     |         |      |      |      |     |        |     |     |    |           |     |            |     |      |        |        |        |     |       |   |   |     |     |         |     |   |   |   |   |     |      |     |      |   |   |      |      |      |        |         |   |   |   |   |   |   |    |   |   |        |   |        |        |   |        |        |        |   |   |   |   |   |   |   |   |        |
| <i>NtAQP1</i>    | TVMGLKRS           | DSL           | CS        | SS      | --VGI   | QGV    | AWAF   | GGMIF  | ALVY       | CTAGIS   | GGHIN        | PAVT        | FG  | L    | LARK | LSL   | TR | AI | FY  | I   | VMQ     | CL   | GAIC | GAGV | VKG | FM---V | GPY | QRL | G  | GGA       |     |            |     |      |        |        |        |     |       |   |   |     |     |         |     |   |   |   |   |     |      |     |      |   |   |      |      |      |        |         |   |   |   |   |   |   |    |   |   |        |   |        |        |   |        |        |        |   |   |   |   |   |   |   |   |        |
| <i>AtTIP4;1</i>  | SAMATDS            | LV            | GN        | TL      | V---GL  | FAV    | AVAH   | AFV    | V          | AVMIS    | AG--HIS      | GGH         | LN  | PAVT | L    | G     | L  | L  | G   | HIS | V       | F    | RAFL | Y    | WID | Q      | L   | L   | A  | S         | AAC | F          | L   | S    | Y      | L      | T      | G   | G     | M | G | T   | P   | VH----- |     |   |   |   |   |     |      |     |      |   |   |      |      |      |        |         |   |   |   |   |   |   |    |   |   |        |   |        |        |   |        |        |        |   |   |   |   |   |   |   |   |        |
| <i>NtTIPa</i>    | SAMAANK            | L             | NGD       | -----   | AM      | A      | H      | L      | V          | V        | A            | V           | T   | I    | S    | A     | G  | F  | RIS | GGH | LN      | PAVT | L    | G    | L   | C      | M   | G   | G  | HIT       | V   | F          | R   | S    | I      | L      | Y      | WID | Q     | L | L | A   | S   | V       | A   | A | C | L | L | N   | Y    | L   | T    | A | G | L    | E    | T    | P      | VH----- |   |   |   |   |   |   |    |   |   |        |   |        |        |   |        |        |        |   |   |   |   |   |   |   |   |        |
| <i>BpeTIP1;1</i> | SGMAFN             | K             | L         | T       | D       | N      | G      | S      | T          | T        | P            | S           | G   | L    | V    | Q     | A  | A  | L   | A   | H       | A    | F    | G    | L   | F      | V   | A   | S  | I         | S   | A          | NIS | GGH  | V      | N      | PAVT   | F   | G     | A | F | I   | G   | G       | NIT | L | L | R | G | I   | V    | Y   | WIA  | Q | L | L    | G    | S    | T      | V       | A | C | L | L | K | F | A  | T | N | G      | L | T      | T      | S | A      | F----- |        |   |   |   |   |   |   |   |   |        |
| <i>BpeTIP1;2</i> | SGVAFN             | K             | L         | T       | D       | N      | G      | S      | T          | T        | P            | A           | G   | L    | V    | A     | A  | L  | A   | H   | A       | F    | G    | L    | F   | V      | A   | S   | I  | S         | A   | NIS        | GGH | V    | N      | PAVT   | F      | G   | A     | F | L | G   | G   | HIS     | L   | I | R | G | L | L   | Y    | W   | V    | A | Q | L    | L    | G    | S      | V       | V | A | C | L | L | K | F  | S | T | G      | G | L      | E      | T | P      | A      | F----- |   |   |   |   |   |   |   |   |        |
| <i>BpeTIP1;3</i> | SGMAFN             | K             | L         | T       | D       | N      | G      | S      | T          | T        | P            | S           | G   | L    | V    | A     | A  | L  | A   | H   | A       | F    | A    | L    | F   | V      | A   | S   | V  | G         | A   | NIS        | GGH | V    | N      | PAVT   | F      | G   | A     | F | I | G   | G   | NIT     | L   | L | R | T | I | L   | Y    | WIA | Q    | L | L | G    | S    | V    | V      | A       | C | L | L | K | F | A | T  | G | G | L      | E | T      | S      | A | F----- |        |        |   |   |   |   |   |   |   |   |        |
| <i>BpeTIP3;1</i> | SLLALI             | -Y            | K         | D       | T       | G      | S      | T      | -P         | S        | E            | L           | V   | A    | I    | A     | L  | A  | H   | A   | F       | S    | L    | F    | A   | V      | A   | A   | S  | L         | NIS | GGH        | V   | N    | PAVT   | F      | G      | T   | L     | L | G | RIS | V   | L       | R   | A | V | F | Y | WIA | Q    | L   | L    | G | A | V    | V    | A    | S      | L       | L | R | L | V | T | N | N  | M | R | P      | V | G      | F----- |   |        |        |        |   |   |   |   |   |   |   |   |        |
| <i>BpeTIP2;1</i> | SAIAYN             | K             | L         | T       | S       | N      | A      | L      | D          | P        | S            | G           | L   | V    | GIA  | I     | C  | H  | G   | F   | A       | L    | F    | V    | A   | V      | A   | G   | A  | NIS       | GGH | V          | N   | PAVT | F      | G      | L      | A   | L     | G | G | QIT | L   | T       | L   | T | G | I | F | Y   | WIA  | Q   | L    | L | G | S    | I    | A    | A      | C       | F | L | K | A | V | T | -G | L | A | I      | P | T      | H----- |   |        |        |        |   |   |   |   |   |   |   |   |        |
| <i>BpeTIP2;2</i> | SAISY              | G             | K         | L       | T       | S      | D      | A      | L          | D        | P            | A           | G   | L    | V    | A     | V  | A  | H   | A   | F       | A    | L    | F    | V   | G      | V   | S   | I  | A         | A   | NIS        | GGH | V    | N      | PAVT   | F      | G   | L     | A | L | G   | G   | NIT     | I   | L | T | G | I | F   | Y    | WIA | Q    | C | L | G    | S    | I    | V      | A       | C | L | L | L | Q | F | V  | T | N | G      | L | S      | I      | P | T      | H----- |        |   |   |   |   |   |   |   |   |        |
| <i>BpeTIP4;1</i> | SAMAAD             | K             | L         | D       | S       | G      | S      | L      | V---GL     | FAV      | A            | I           | T   | H    | A    | L     | V  | V  | A   | MIS | AG--HIS | GGH  | LN   | PAVT | L   | G      | L   | A   | G  | HIT       | I   | F          | R   | S    | F      | L      | Y      | WID | Q     | L | L | A   | A   | S       | A   | C | I | I | L | Y   | I    | T   | G    | G | L | T    | P    | I    | H----- |         |   |   |   |   |   |   |    |   |   |        |   |        |        |   |        |        |        |   |   |   |   |   |   |   |   |        |
| <i>BpeTIP5;1</i> | SAMSSR             | K             | L         | M       | P       | D      | V      | A      | S          | D        | A            | S           | S   | L    | V    | V     | V  | A  | I   | T   | N       | A    | F    | A    | L   | S      | A   | A   | V  | Y         | A   | A          | NIS | GGH  | V      | N      | PAVT   | F   | G     | M | A | V   | G   | G       | HIS | V | P | T | A | L   | F    | Y   | W    | L | S | Q    | M    | L    | A      | S       | V | M | A | S | L | L | K  | M | T | V      | V | G      | H      | V | P      | T      | Y----- |   |   |   |   |   |   |   |   |        |
| <i>BpeXIP1;1</i> | SIIACL             | D             | S         | Q       | E       | V      | D      | P      | K--LL---   | V        | P            | L           | A   | V    | F    | I     | I  | A  | F   | L   | L       | A    | T    | I    | P   | L      | S   | G   | G  | H         | M   | N          | P   | I    | L      | T      | F      | I   | A     | C | L | K   | G   | L       | I   | T | L | A | R | A   | S    | I   | Y    | V | L | A    | Q    | C    | L      | G       | S | I | I | G | F | F | I  | I | K | N      | V | M      | N      | H | Q      | T      | G      | H | N | Y | F | L | G | G | C | T----- |
| <i>BpeXIP1;2</i> | SIIACL             | D             | S         | H       | E       | V      | D      | P      | K--LL---   | V        | P            | L           | A   | V    | F    | I     | I  | A  | F   | L   | M       | A    | T    | A    | P   | L      | S   | G   | G  | H         | M   | S          | P   | I    | F      | T      | F      | I   | A     | C | L | K   | G   | L       | I   | T | L | A | R | A   | S    | I   | Y    | V | L | A    | Q    | C    | L      | G       | S | I | I | G | F | F | I  | I | K | N      | V | M      | N      | H | Q      | I      | G      | H | K | Y | F | L | G | G | C | T----- |
| <i>BpeXIP1;3</i> | SIIACL             | D             | S         | H       | E       | V      | D      | P      | K--LL---   | V        | P            | L           | A   | V    | F    | I     | I  | A  | F   | L   | M       | A    | T    | V    | P   | L      | S   | G   | G  | H         | M   | S          | P   | I    | F      | T      | F      | I   | A     | C | L | K   | G   | L       | I   | T | L | A | R | A   | S    | M   | Y    | V | L | A    | Q    | C    | L      | G       | S | I | I | G | F | F | I  | I | K | N      | V | M      | N      | H | Q      | T      | G      | H | K | Y | F | L | G | G | C | T----- |
| <i>BpeXIP2;1</i> | IVISS              | F             | E         | T       | K       | T      | E      | S      | P          | K--LI--- | M            | S           | L   | L    | I    | A     | I  | T  | A   | I   | L       | L    | A    | N    | P   | I      | S   | G   | G  | H         | M   | N          | P   | A    | I      | T      | L      | A   | A     | L | V | G   | VIS | V       | S   | R | A | V | I | L   | A    | Q   | C    | A | V | L    | G    | A    | L      | K       | A | V | N | S | T | I | E  | D | T | F      | S | L      | G      | G | C      | T----- |        |   |   |   |   |   |   |   |   |        |
|                  | 210                | 220           | 230       | 240     | 250     | 260    | 270    | 280    | 290        | 300      |              |             |     |      |      |       |    |    |     |     |         |      |      |      |     |        |     |     |    |           |     |            |     |      |        |        |        |     |       |   |   |     |     |         |     |   |   |   |   |     |      |     |      |   |   |      |      |      |        |         |   |   |   |   |   |   |    |   |   |        |   |        |        |   |        |        |        |   |   |   |   |   |   |   |   |        |
| <i>CpNIP1</i>    | --TTP              | S             | G         | S       | D       | L----- | Q      | A      | L          | V        | M            | E           | I   | V    | V    | T     | F  | S  | M   | F   | V       | T    | C    | A    | V   | A      | T   | D   | T  | K--A----- | V   | G          | E   | L    | A      | G      | L      | A   | V     | G | S | A   | V   | C       | I   | T | S | I | L | A   | G--P | V   | S    | G | G | S    | M    | N    | P      | V       | R | T | L | G | P | A | M  | A | S | D----- | N |        |        |   |        |        |        |   |   |   |   |   |   |   |   |        |
| <i>AtNIP6;1</i>  | --TV               | P             | T         | V       | G       | L      | S----- | Q      | A          | F        | A            | L           | E   | F    | I    | I     | S  | F  | N   | L   | M       | F    | V    | V    | T   | A      | V   | A   | T  | D         | T   | R--A-----  | V   | G    | E      | L      | A      | G   | I     | A | V | G   | A   | T       | V   | M | L | N | I | L   | I    | A   | G--P | A | T | S    | A    | S    | M      | N       | P | V | R | T | L | G | P  | A | I | A      | A | N----- | N      |   |        |        |        |   |   |   |   |   |   |   |   |        |
| <i>AtNIP2;1</i>  | L                  | G             | S         | S       | P       | S      | G      | S      | D          | L-----   | Q            | A           | F   | V    | M    | E     | F  | I  | I   | T   | G       | F    | L    | M    | V   | C      | A   | V   | T  | T         | T   | KR--T----- | T   | E    | E      | L      | E      | G   | L     | I | I | G   | A   | T       | V   | T | L | N | V | I   | F    | A   | G--E | V | S | G    | A    | S    | M      | N       | P | A | R | S | I | G | P  | A | L | V      | W | G---C  |        |   |        |        |        |   |   |   |   |   |   |   |   |        |
| <i>AtTIP4;1</i>  | -T                 | L             | A         | S       | G       | V      | S      | Y      | T-----     | Q        | G            | I           | I   | W    | E    | I     | I  | L  | T   | F   | S       | L    | L    | F    | T   | V      | Y   | A   | T  | I         | V   | D          | P   | K    | K      | G      | S----- | L   | D     | G | F | G   | P   | L       | L   | T | G | F | V | V   | G    | A   | N    | I | L | A    | G    | G--A | F      | S       | G | A | S | M | N | P | A  | R | S | F      | G | P      | A      | L | V      | S      | G---N  |   |   |   |   |   |   |   |   |        |
| <i>NtAQP1</i>    | N                  | V             | V         | N       | H       | G      | Y      | T      | K          | G-----   | D            | G           | L   | G    | A    | E     | I  | I  | G   | T   | F       | V    | L    | V    | Y   | T      | V   | F   | S  | A         | T   | D          | A   | K    | R      | N      | A      | R   | D---S | Y | V | P   | I   | L       | A   | P | L | P | I | G   | F    | A   | V    | F | L | V    | H    | L    | A      | T--I    | P | I | T | G | T | G | I  | N | P | A      | R | S      | I      | G | A      | A      | I      | I | Y | N | T | D | Q | A |   |        |
| <i>NtTIPa</i>    | -T                 | L             | A         | N       | G       | V      | S      | Y      | G-----     | Q        | G            | I           | I   | M    | E    | V     | I  | L  | T   | F   | S       | L    | L    | F    | T   | V      | Y   | T   | T  | I         | V   | D          | P   | K    | K      | G      | I----- | L   | E     | G | M | G   | P   | L       | L   | T | G | L | V | V   | G    | A   | N    | I | M | A    | G    | G--P | F      | S       | G | A | S | M | N | P | A  | R | S | F      | G | P      | A      | F | V      | S      | G---I  |   |   |   |   |   |   |   |   |        |
| <i>BpeTIP1;1</i> | -S                 | L             | S         | S       | G       | V      | G      | V      | W-----     | N        | A            | F           | V   | L    | E    | I     | V  | M  | T   | F   | G       | L    | V    | Y    | T   | V      | Y   | A   | T  | A         | V   | D          | P   | K    | R      | G      | S----- | V   | G     | V | I | A   | P   | I       | A   | I | G | F | I | V   | G    | A   | N    | I | L | A    | G    | G--A | F      | D       | G | A | S | M | N | P | A  | V | S | F      | G | P      | A      | L | V      | S      | W---T  |   |   |   |   |   |   |   |   |        |
| <i>BpeTIP1;2</i> | -S                 | L             | S         | S       | D       | V      | S      | V      | W-----     | N        | A            | V           | V   | L    | E    | I     | V  | M  | T   | F   | G       | L    | V    | Y    | T   | V      | Y   | A   | T  | A         | V   | D          | P   | K    | K      | G      | N----- | I   | G     | I | L | A   | P   | I       | A   | I | G | L | I | V   | G    | A   | N    | I | L | A    | G    | G--A | F      | D       | G | A | S | M | N | P | A  | V | S | F      | G | P      | A      | V | V      | S      | W---S  |   |   |   |   |   |   |   |   |        |
| <i>BpeTIP1;3</i> | -S                 | L             | S         | S       | G       | V      | S      | V      | W-----     | N        | A            | V           | V   | F    | E    | I     | V  | M  | T   | F   | G       | L    | V    | Y    | T   | V      | Y   | A   | T  | A         | V   | D          | P   | K    | K      | G      | N----- | V   | G     | T | V | A   | P   | I       | A   | I | G | F | I | V   | G    | A   | N    | I | L | V    | G    | G--A | F      | D       | G | A | S | M | N | P | A  | V | S | F      | G | P      | A      | V | V      | S      | W---S  |   |   |   |   |   |   |   |   |        |
| <i>BpeTIP3;1</i> | -Y                 | V             | T         | S       | G       | V      | G      | E      | W-----     | H        | G            | L           | F   | E    | I    | V     | M  | T  | F   | T   | L       | V    | Y    | T    | V   | F      | A   | T   | A  | I         | D   | P          | K   | R    | G      | S----- | L      | G   | T     | I | A | P   | I   | A       | I   | G | F | I | V | G   | A    | N   | I    | L | A | G    | G--P | F    | D      | G       | A | C | M | N | P | A | R  | A | F | G      | P | A      | L      | V | W---R  |        |        |   |   |   |   |   |   |   |   |        |
| <i>BpeTIP2;1</i> | -S                 | V             | A         | S       | G       | V      | G      | A      | I-----     | E        | G            | V           | M   | E    | I    | I     | T  | F  | A   | L   | V       | Y    | T    | V    | Y   | A      | T   | A   | A  | D         | P   | K          | K   | G    | S----- | L      | G      | T   | I     | A | P | I   | A   | I       | G   | F | I | V | G | A   | N    | I   | L    | A | G | G--P | F    | S    | G      | G       | S | M | N | P | A | R | S  | F | G | P      | A | V      | A      | S | G---D  |        |        |   |   |   |   |   |   |   |   |        |
| <i>BpeTIP2;2</i> | -G                 | V             | A         | S       | G       | M      | N      | A      | V-----     | E        | G            | V           | M   | E    | I    | V     | T  | F  | A   | L   | V       | Y    | T    | V    | Y   | A      | T   | A   | A  | D         | P   | K          | K   | G    | S----- | L      | G      | I   | I     | A | P | I   | A   | I       | G   | F | I | V | G | A   | N    | I   | L    | A | G | G--P | F    | S    | G      | G       | S | M | N | P | A | R | S  | F | G | P      | A | V      | V      | S | G---D  |        |        |   |   |   |   |   |   |   |   |        |
| <i>BpeTIP4;1</i> | -S                 | L             | A         | S       | G       | V      | G      | Y      | L-----     | Q        | G            | V           | I   | M    | E    | V     | I  | L  | T   | F   | S       | L    | L    | F    | T   | V      | Y   | A   | T  | I         | V   | D          | P   | K    | K      | G      | A----- | L   | D     | G | L | G   | P   | T       | L   | T | G | F | V | V   | G    | A   | N    | I | L | A    | G    | G--A | F      | S       | G | A | S | M | N | P | A  | R | S | F      | G | P      | A      | L | I      | S      | G---D  |   |   |   |   |   |   |   |   |        |
| <i>BpeTIP5;1</i> | -V                 | I             | A         | E       | E       | M      | T      | G      | F-----     | G        | A            | S           | L   | M    | E    | G     | V  | L  | T   | F   | A       | L    | V    | Y    | T   | V      | Y   | A   | -A | G         | D   | T          | R   | R    | G      | T----- | M      | G   | A     | I | G | I   | A   | I       | G   | S | I | A | G | A   | N    | V   | L    | A | A | G--P | F    | S    | G      | G       | S | M | N | P | A | C | A  | F | G | S      | A | V      | T      | A | G---S  |        |        |   |   |   |   |   |   |   |   |        |
| <i>BpeXIP1;1</i> | I                  | S             | A         | L       | N       | R      | G      | T----- | A          | L        | V            | L           | E   | F    | C    | C     | T  | F  | V   | L   | L       | F    | V    | G    | V   | T      | V   | A   | F  | D         | K   | K          | R   | C    | K      |        |        |     |       |   |   |     |     |         |     |   |   |   |   |     |      |     |      |   |   |      |      |      |        |         |   |   |   |   |   |   |    |   |   |        |   |        |        |   |        |        |        |   |   |   |   |   |   |   |   |        |

110 120 130 140 150 160 170 180 190 200  
 | | | | | | | | | |  
*NtAQP1* VMGLKRSDSLCSVGIQGVAWAFGGMIFALVYCTAGISGGHINPAVTFGLFLARKLSLTRAIFYIVMQCLGAICGAGVVKGMVGPYQRLGGG---ANVV  
*NtTIPa* AMAANKLNG-D-----AMAHALVVAVTISAGFRISGGHLNPAVTLGLCMGGHITVFRSILYWIWDQLLASVAACALLNYLTAG---LETP---VHTL  
*AtTIP4;1* AMATDSLVG-NTLVGLFAVAVAHAFVAVMISAG-HISGGHLNPAVTLGLLLGGHISVFRAFLYWIWDQLLASSAACFLLSYLTGG---MGTP---VHTL  
*AtNIP6;1* AIVNQKTGDGAETLIG---CAASAGLAVMIVILSTGHISGAHLNPAVTIAFAALKHFPPWKHVPVYIGAQVMASVSAAFALKAVFEPTMSG-----GVT  
*AtNIP2;1* IAVNAQHNHVVTLVG---IAVVWGVIVIMVLVYCLGHLNPAVTLALASSQRFPLNQVPAYITVQVIGSTLASATLRLFFDLNNDVCSKKHDFVLGSG  
*CpNIP1* AALNGSDAQRVSQLG---ASVAGGLIVTVMIIYAVGHISGAHMNPAVTTAFATRHFPWKQVPLYAAAQLSGATCAAFTRLRLLLHPIKH-----LGTT  
*BpeNIP1;1* VAVNKIYGSV-TFPG---ICVTWGLIVTVMIIYTVGHISGAHFNPAVTITSAIFRRFPYKEVPLYIAAQLMGSILASGTLALVFDVTPDA-----YFGT  
*BpeNIP4;1* VVVNKIYGSV-SFPG---ICVVWGLIVMVMIIYSVGHISGAHFNPAVTITFAIFRRFPPLKQVPLYIVAQMIGSTLASATLCALFPVDKKS-----FFGT  
*BpeNIP1;2* VVVNLGNDKVVTPAG---VSIVWGLAVMVLVYSVGHISGAHFNPAVTIAFATCRRFPWKQVPLYVSAQVLGSTMASGTLRLIFNGHENR-----FVGT  
*BpeNIP2;1* AALSAADENKVSCLA---ASVAGGLIVTVMIIYAVGHISGAHMNPAVTLAFAAVRHFPWKQVPLYAAAQLAGAI SAAFTLRVILNPIKE-----LGTT  
*BpeNIP5;1* PIVNQKYNGAESLIG---NAACAGLAVMVLVILSTGHISGAHLNPSLTIAFATLRHFPWLQVPAYIAAQVSGSICASFALKGVFHPYMSG-----GVT  
*BpeNIP5;2* PIVNEKYQGAETLIG---SAACAGLAVMVLVILSTGHISGAHFNPSVTIAFAALRHFPWKVPGYLVQAQVSASICAFTLRKGVFHPFMSG-----GVT  
*BpeNIP6;1* AMVNQKTHGSETLLG---CAASSGLAVMVLVILSTGHISGAHLNPAVTIAFAALKHFPPWKHVPVYIGAQVVASFCAAFALKGVFHPIMGG-----GVT  
*BpeNIP7;1* IACTQLSKGEVGLLE---YAATAGLTVVVVIFSIGHISCAHVNPAVTIAFATFGHFPWSKVPLYILAQTLGSLVLTATCIGQSVYDVKSE-----FMTT

210 220 230 240 250 260 270 280 290 300  
 | | | | | | | | | |  
*NtAQP1* NHGYTKGDGLGAEIIGTFVLVYTVFSA-TDAKRNARDSYVPILAPLPIGFAVFLVHLATIPITGTGINPARSLGAAIYNTDQAWDDHWIFWVGPFIGAA  
*NtTIPa* ANGVSYGQGIIMEVILTFSLFTVYTTIVDPKKGILEGMGPLLTGLVVGANI---MAGGPFSGASMNPARSFGPAFVSGI---WTDHWVYVWGPLIGGG  
*AtTIP4;1* ASGVSYTQGIIEWEIIILTFSLFTVYATIVDPKKGSLDGFGLLTGFVVGANI---LAGGAFSGASMNPARSFGPALVSGN---WTDHWVYVWGPLIGGG  
*AtNIP2;1* SPSGSDLQAFVMEFIITGFLMLVCAVTTTKRT-----TEELEGLIIGATVTNLNVI FAGEVSGASMNPARSIGPALVWGC---YKGIWIYLLAPTLGAV  
*AtNIP6;1* VPTVGLSQAFALEFIISFNLMFVVTVAVATDTRA-----VGELAGIAVGATVMLNIIAGPATSSASMNPVRTLGPPIAANN---YRAIWVYLTAPILGAL  
*CpNIP1* TSPGSDLQALVMEIVVTFSMFMFVTCVAVATDTKA-----VGELAGLAVGSAVCITSILAGPVSGGSMNPVRTLGPAMASDN---YKGLWVYFVGPTGTGL  
*BpeNIP1;1* VPTGSNSQSLVLEILCSFLLMFVISGVTTDSRA-----ISEVAGIAVGMTILLNVFIAGPVSGASMNPARSIRPAVIKHV---YKGLWVYIVGPIIGTI  
*BpeNIP4;1* APVGSNFQALIIIEIIISFLLMFVICGVATDNRA-----IGELAGIAVGMTITLNVFVAGPVSGASMNPARSIGPALLTHM---YKGLWIYILGPLAGTI  
*BpeNIP1;2* IPAGSNLQSFALFIITFYLMFVISGVATDNRA-----IGELAGLAVGSTILLNVMFAGPISGASMNPARSLGPAIVHNK---YESIWWVYLVATTLGAI  
*BpeNIP2;1* SPTGTIEIALVMEIVVTFMTMTASAVATDTKA-----IGELAGLAVGSAVCITSILAGPISGGSMPARTIGPAIASAS---YKGIWVYLVGPVGTGL  
*BpeNIP5;1* VPSVTEGQAFALEFIITFNLLFVTVAVATDTRA-----VGELAGIAVGATVMLNIIAGPVSSGGSMPVRTLGPPIAAGN---YKSLWIYLVAPTGLAL  
*BpeNIP5;2* VPAVGIGQAFALEFIVTFTLLFVITAVATDTCA-----VGEFAGIAIGTVMLNIIAGVTTTGASMNPVRTIGPAIAAGT---YKGFWIYMVAPILGAL  
*BpeNIP6;1* VPSGSYGQAFALEFIISFNLMFVVTVAVATDTRA-----VGELAGIAVGATVMLNIIAGPTTGASMNPVRTLGPPIAANN---YKAIWVYLTAPILGAL  
*BpeNIP7;1* RPLRGCSAFAWVELIATFIIMFLAASVTYQHQS-----VGHLSGFVVGIAISL---AVPVSGGSMNPARS LGPAIISGK---FNDIWIYMTAPTIGAV
