# Supplementary material for: Genome-Wide Identification, Structure Characterization, and Expression Pattern Profiling of the Aquaporin Gene Family in Betula pendula
Source: MDPI journal article supplement (doi:10.3390/ijms22147269), 2021-07-06

**Figure S4. Manual analysis of the *BpeXIP2* group leading to the theoretical redefinition of a *BpeXIP2;1* used in this work.**

This manual reconstruction took into account orthologous sequences from *B. platyphylla* and *B. nana* species, and related reads from the RNA sequencing used for the transcriptional expression analyses.

The original *B. pendula* sequences which were retrieval in the public databases (CoGe, NCBI) are : Bpev01.c2937.g0004 for a full-length sequence (named in this Figure *BpeXIP2;1*), and Bpev01.c1577.g0027 for a truncated sequence (named in this Figure *BpeXIP2;1*-like, “-like” in reference to a pseudogene sequence).

The redefined “*BpeXIP2;1*” sequence used for this work was named *BpeXIP2;1*.

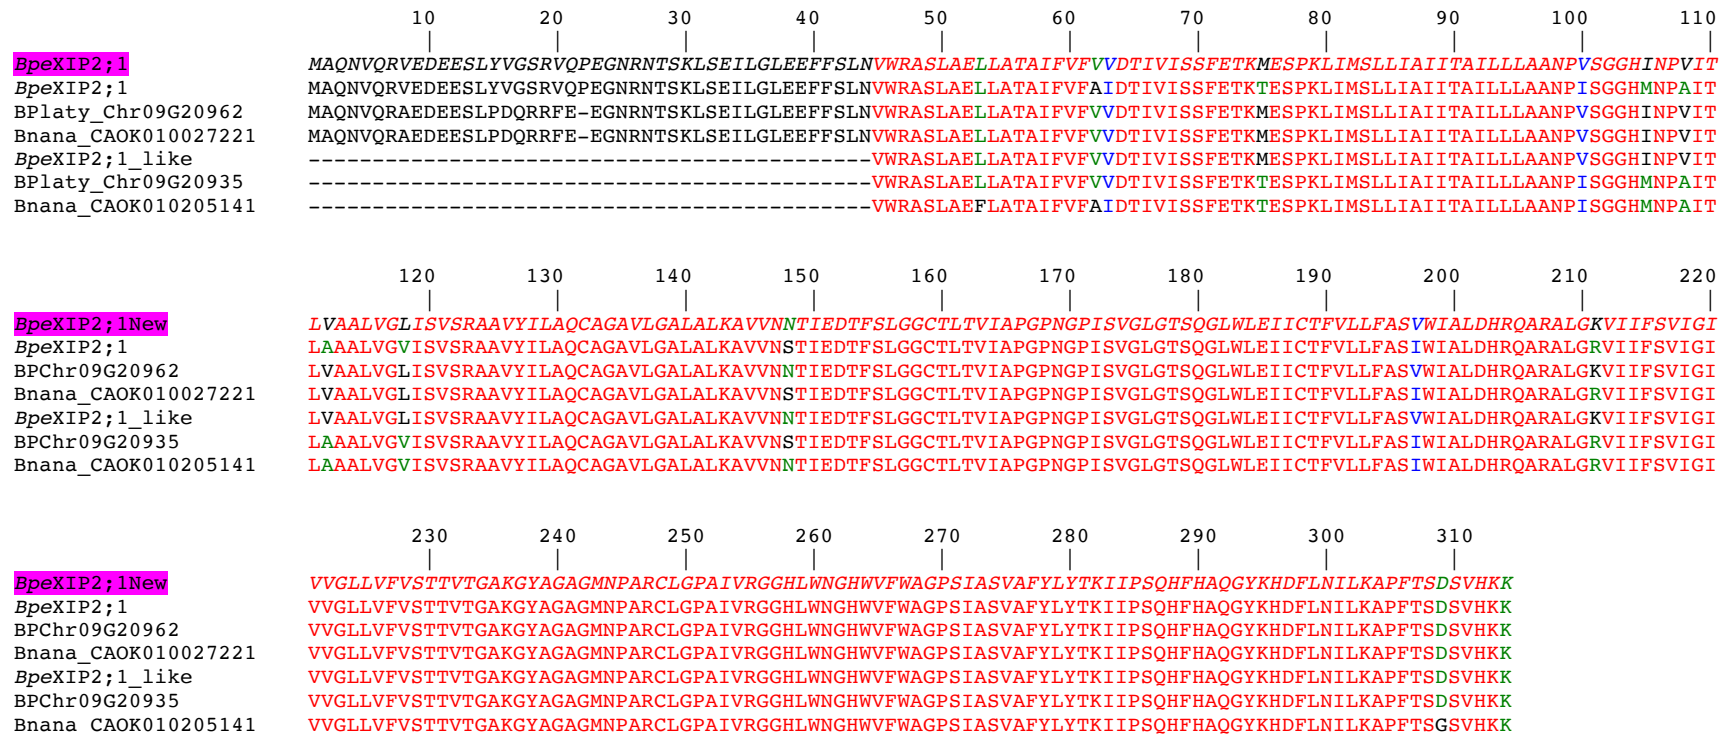

Supplement: s1 [file s1]
